# Supplementary material for: Characterizing conjugative plasmids from an antibiotic-resistant dataset for use as broad-host delivery vectors
Source: Front Microbiol. 2023 Jun 14;14:1199640. doi: 10.3389/fmicb.2023.1199640 (PMC10301749; doi:10.3389/fmicb.2023.1199640)
Supplement: Supplementary file 1 [file Table_1.XLSX]

## Sheet: All_Plasmids
Genus	Organism	AR_Bank_ID	Plasmid_ID	Length	GC	ARGs	Inc_Type	Relaxase_type(s)	MPF_type	oriT_type(s)	Predicted_mobility	Predicted_host_range_overall_rank	Methyltransferases	Par	PSI	MPS	Toxins	Antitoxins	RNA_antitoxins	Virulence
Enterobacter	Enterobacter cloacae complex sp. AR_0002	AR_0002	NZ_CP018815.1	139942	54.04	dfrA14 sul2 APH(3'')-Ib APH(6)-Id TEM-1 OXA-9 ANT(3'')-IIa AAC(6')-Ib9 KPC-3	IncFI(RepE) IncFII(RepA1)	MOBF,MOBF	MPF_F		conjugative	order		ParB	psiB_ECOLX psiB_ECOLX	traN_F
Klebsiella	Klebsiella pneumoniae	AR_0049	NZ_CP018817.1	140825	51.92	BRP(MBL) NDM-1 rmtC sul1 qacEdelta1 AAC(6')-Ib10 CMY-6	IncA/C (=IncP-3)	MOBH,MOBH	MPF_F	MOBH	conjugative	phylum								htpB
Klebsiella	Klebsiella pneumoniae	AR_0049	NZ_CP018818.1	117755	51.21	tet(A) mphA	pCD1 IncFI(RepB)				non-mobilizable	order		sopB sopB	psiB_ECOLX		STM3651	STM3652		ibeB
Klebsiella	Klebsiella pneumoniae	AR_0049	NZ_CP018819.1	85161	52.74	sul2 APH(3'')-Ib APH(6)-Id TEM-1 CTX-M-15 AAC(3)-IIe OXA-1 AAC(6')-Ib-cr6 SHV-11 QnrB6 dfrA14 AAC(6')-Ib10	IncFI(RepE) IncR			MOBF	mobilizable	order		ParB
Escherichia	Escherichia coli	AR_0118	NZ_CP020049.1	141885	52.02	BRP(MBL) NDM-1 rmtC sul1 qacEdelta1 AAC(6')-Ib10 CMY-6	IncA/C (=IncP-3)	MOBH,MOBH	MPF_F	MOBH	conjugative	phylum	REBASE:M.XmnI							htpB
Escherichia	Escherichia coli	AR_0118	NZ_CP020050.1	113431	52.53		IncT	MOBP	MPF_I		conjugative	order					XOC_RS18085 D616_p97105	D616_p97106		mrkF mrkJ
Escherichia	Escherichia coli	AR_0118	NZ_CP020051.1	91291	47.67		IncFI(RepE)				non-mobilizable	family		ParM			VCA0391
Enterobacter	Enterobacter cloacae complex sp.	AR_0065	NZ_CP020054.1	69729	52.15		IncN				non-mobilizable	order					b1563 hok(hok)	b1564	NG_034386.1
Klebsiella	Klebsiella pneumoniae	AR_0117	NZ_CP020062.1	152697	50.47	SHV-5 sul1 qacEdelta1 catB3 ANT(2'')-Ia dfrA19	IncZ IncFI(RepB)	MOBF			mobilizable	order		sopB sopB	psiB_ECOLX		STM4031			ibeB
Klebsiella	Klebsiella pneumoniae	AR_0117	NZ_CP020063.1	109019	49.16		IncFI(RepB)				non-mobilizable	order
Klebsiella	Klebsiella pneumoniae	AR_0117	NZ_CP020064.1	83376	54.03	AAC(6')-Ib' ANT(3'')-IIa OXA-9 TEM-1	IncFII(RepA1)	MOBF	MPF_F		conjugative	order			psiB_ECOLX	traN_F
Klebsiella	Klebsiella pneumoniae	AR_0117	NZ_CP020065.1	74540	51.5		IncFI(RepE) pCD1	MOBF,MOBF	MPF_F		conjugative	order			psiB_ECOLX		hok(hok)
Klebsiella	Klebsiella pneumoniae	AR_0117	NZ_CP020066.1	72663	53.42	dfrA14 KPC-3 AAC(6')-Ib10	IncN	MOBC,MOBF	MPF_T	MOBF	conjugative	class
Klebsiella	Klebsiella pneumoniae	AR_0068	NZ_CP020068.1	276460	46.6	sul2 APH(3'')-Ib APH(6)-Id SHV-11 AAC(3)-IId BRP(MBL) NDM-1 APH(3')-VI mphE msrE armA sul1 qacEdelta1 aadA2 dfrA12	GR5	MOBH	MPF_F		conjugative	class	REBASE:M.Pae10332II				b1563 hok(hok)	VCA0445 STM3652		PA3142 htpB
Klebsiella	Klebsiella pneumoniae	AR_0068	NZ_CP020069.1	213013	52.36	catI	IncFI(RepB) pCD1	MOBF,MOBF	MPF_F		conjugative	order		sopB sopB	psiB_ECOLX	traN_F	hok(hok) XOC_RS18085 XOC_RS18085 STM3651	STM3652		ibeB
Klebsiella	Klebsiella pneumoniae	AR_0068	NZ_CP020070.1	37875	52.26	TEM-1 OXA-9 ANT(3'')-IIa AAC(6')-Ib10 CTX-M-15	IncR				non-mobilizable	order		ParB
Escherichia	Escherichia coli	AR_0061	NZ_CP020059.1	87982	53.01	sul2 APH(3'')-Ib APH(6)-Id TEM-1 OXA-9 ANT(3'')-IIa AAC(6')-Ib9 KPC-3 dfrA14	IncFII(RepA1) IncN	MOBF	MPF_T	MOBF	conjugative	class
Escherichia	Escherichia coli	AR_0061	NZ_CP020060.1	50999	52.2	tet(A) TEM-1 sul3 sul1 qacEdelta1 aadA2 dfrA12				MOBF	mobilizable	order					b1563	VCA0445
Escherichia	Escherichia coli	AR_0069	NZ_CP020056.1	136975	52.13	BRP(MBL) NDM-1 sul1 qacEdelta1 AAC(6')-Ib10 CMY-6	IncA/C (=IncP-3)	MOBH,MOBH	MPF_F	MOBH	conjugative	phylum								htpB PA3142
Escherichia	Escherichia coli	AR_0069	NZ_CP020057.1	31196	52.65	tet(A) TEM-1 APH(6)-Id APH(3'')-Ib sul2 TEM-1 dfrA8	IncZ		MPF_F		non-mobilizable	order
Klebsiella	Klebsiella pneumoniae	AR_0115	NZ_CP020072.1	209424	52.88	APH(3')-Ia mphA sul1 qacEdelta1 aadA2 dfrA12 catI	pCD1 IncFI(RepB)	MOBF,MOBF	MPF_F		conjugative	order		sopB sopB	psiB_ECOLX	traN_F	STM3651 XOC_RS18085 XOC_RS18085 hok(hok)	STM3652		ibeB
Klebsiella	Klebsiella pneumoniae	AR_0115	NZ_CP020073.1	39762	53.62	APH(4)-Ia AAC(3)-IV sul3 qacL ANT(3'')-IIa cmlA1 aadA2	IncR			MOBF	mobilizable	order		ParB
Klebsiella	Klebsiella pneumoniae	AR_0115	NZ_CP020074.1	43380	46.83	SHV-12		MOBP	MPF_T		conjugative	order
Klebsiella	Klebsiella pneumoniae	AR_0115	NZ_CP020075.1	22062	57.29	TEM-1 KPC-3		MOBC			mobilizable	class
Klebsiella	Klebsiella pneumoniae	AR_0098	NZ_CP020109.1	169952	52.7	catI dfrA12 aadA2 qacEdelta1 sul1 mphA	IncFI(RepB) pCD1	MOBF,MOBF	MPF_F		conjugative	order		sopB sopB	psiB_ECOLX	traN_F	XOC_RS18085 XOC_RS18085 hok(hok) XOC_RS18085 STM3651	STM3652		ibeB
Klebsiella	Klebsiella pneumoniae	AR_0098	NZ_CP020110.1	73467	54.73	TEM-1 KPC-2 APH(4)-Ia AAC(3)-IV sul3 qacL ANT(3'')-IIa cmlA1 aadA2 AAC(6')-Ib10	IncR			MOBF	mobilizable	order		ParB			XOC_RS18085
Klebsiella	Klebsiella pneumoniae	AR_0098	NZ_CP020111.1	43381	46.84	SHV-12		MOBP	MPF_T		conjugative	order
Klebsiella	Klebsiella pneumoniae	AR_0098	NZ_CP020112.1	13841	53.68	AAC(6')-Ib10		MOBC			mobilizable	order
Escherichia	Escherichia coli	AR_0104	NZ_CP020117.1	107210	52.32	TEM-1 tet(A) APH(6)-Id APH(3'')-Ib sul2 mphA sul1 qacEdelta1 aadA5 dfrA17	pCD1 IncFI(RepE)	MOBF	MPF_F	MOBF	conjugative	order		sopB sopB	psiB_ECOLX		D616_p97086(srnB) D616_p97105	D616_p97106	NG_034386.1	AAA92657 senB
Escherichia	Escherichia coli	AR_0104	NZ_CP020118.1	111212	46.28		IncFI(RepB)				non-mobilizable	order					Z4832	Z4833
Escherichia	Escherichia coli	AR_0104	NZ_CP020119.1	51515	52.86	KPC-4 TEM-1 APH(3')-Ia dfrA14	IncN	MOBF	MPF_T	MOBF	conjugative	class
Klebsiella	Klebsiella oxytoca	AR_0147	NZ_CP020359.1	110705	54.1	KPC-3 sul1 dfrA3b sul1 qacEdelta1 ANT(2'')-Ia	IncFII(RepA1)	MOBF	MPF_F		conjugative	order		ParG	psiB_ECOLX	traN_F
Escherichia	Escherichia coli	AR_0149	NZ_CP021533.1	48528	49.98	CMY-42	IncK	MOBP	MPF_I	MOBP	conjugative	order			psiA psiB_ECOLX		D616_p112058(pndA)		NC_023329.1
Escherichia	Escherichia coli	AR_0149	NZ_CP021534.1	46161	46.65	BRP(MBL) NDM-7		MOBP	MPF_T		conjugative	order					XOC_RS18085
Klebsiella	Klebsiella pneumoniae	AR_0047	NZ_CP021540.1	201874	53.02	mphA sul1 qacEdelta1 aadA2 dfrA12 catI	IncFI(RepB)	MOBF,MOBF	MPF_F		conjugative	order		sopB sopB	psiB_ECOLX	traN_F	STM3651 XOC_RS18085 XOC_RS18085 hok(hok)	STM3652		ibeB
Klebsiella	Klebsiella pneumoniae	AR_0047	NZ_CP021541.1	111531	53.01	TEM-1 tet(D) SHV-5	IncK	MOBF,MOBF	MPF_F		conjugative	order			psiB_ECOLX	traN_F	XOC_RS18085 XOC_RS18085
Klebsiella	Klebsiella pneumoniae	AR_0047	NZ_CP021542.1	43379	46.83	SHV-12		MOBP	MPF_T		conjugative	order
Klebsiella	Klebsiella pneumoniae	AR_0047	NZ_CP021543.1	15271	53.47	AAC(6')-Ib10		MOBC			mobilizable	order
Escherichia	Escherichia coli	AR_0119	NZ_CP021536.1	244955	51.43	AAC(6')-Ib10 qacEdelta1 sul1 NDM-1 BRP(MBL) sul1 rmtC CTX-M-15 AAC(3)-IIe TEM-1 CMY-6	IncA/C (=IncP-3) IncZ IncFI(RepE) IncFI(RepB)	MOBF,MOBH,MOBH	MPF_F	MOBH	conjugative	phylum	REBASE:M.EcoGIX	sopB sopB		traN_F	D616_p97086(srnB) D616_p97105	D616_p97106	NC_002483.1	htpB
Escherichia	Escherichia coli	AR_0119	NZ_CP021537.1	97474	47.84		IncFI(RepE)				non-mobilizable	family		ParM			VCA0391
Escherichia	Escherichia coli	AR_0119	NZ_CP021538.1	64372	50.16	CTX-M-15 OXA-1 AAC(6')-Ib-cr6 AAC(6')-Ib10 ANT(3'')-IIa OXA-9	pCD1		MPF_F		non-mobilizable	order			psiB_ECOLX		b1563
Proteus	Proteus mirabilis	AR_0159	NZ_CP021551.1	161830	51.23	mphE msrE armA sul1 BRP(MBL) NDM-1 sul1 BRP(MBL) NDM-1 sul1 qacEdelta1 aadA2 dfrA12	IncA/C (=IncP-3) GR5	MOBH,MOBH	MPF_F	MOBH	conjugative	phylum
Escherichia	Escherichia coli	AR_0162	NZ_CP021680.1	23332	51.12						non-mobilizable
Escherichia	Escherichia coli	AR_0162	NZ_CP021681.1	95850	51.04	APH(6)-Id APH(3'')-Ib sul2 tet(A) QnrS1 CTX-M-15	IncT	MOBC	MPF_T		conjugative	order						b1564		PA3142
Escherichia	Escherichia coli	AR_0162	NZ_CP021682.1	49828	47.34	BRP(MBL) NDM-7		MOBP	MPF_T		conjugative	order					XOC_RS18085
Escherichia	Escherichia coli	AR_0162	NZ_CP021684.1	84929	52.07	ErmB mphA TEM-1	pCD1	MOBF,MOBF	MPF_F	MOBP	conjugative	order	REBASE:M.XphI	ParM	psiB_ECOLX	traN_F			NG_034386.1
Klebsiella	Klebsiella pneumoniae	AR_0112	NZ_CP021544.1	208223	52.88	APH(3')-Ia mphA sul1 qacEdelta1 aadA2 dfrA12 catI	pCD1 IncFI(RepB)	MOBF,MOBF	MPF_F		conjugative	order		sopB sopB	psiB_ECOLX	traN_F	STM3651 XOC_RS18085 hok(hok)	STM3652		ibeB
Klebsiella	Klebsiella pneumoniae	AR_0112	NZ_CP021545.1	125536	53.62	SHV-12	IncFII(RepA1) IncT	MOBF	MPF_F		conjugative	order			psiB_ECOLX	traN_F	D616_p97105	D616_p97106
Klebsiella	Klebsiella pneumoniae	AR_0112	NZ_CP021546.1	74660	45.2	KPC-3 TEM-1	IncFII(RepA1)	MOBP	MPF_T		conjugative	family				pilV_KLPN pilS_TP114
Klebsiella	Klebsiella pneumoniae	AR_0112	NZ_CP021547.1	45740	53.26	aadA2 cmlA1 ANT(3'')-IIa qacL sul3 AAC(3)-IV APH(4)-Ia AAC(6')-Ib10	IncR			MOBF	mobilizable	order		ParB
Klebsiella	Klebsiella pneumoniae	AR_0112	NZ_CP021548.1	22633	57.39	KPC-3 AAC(6')-Ib10		MOBC			mobilizable	class
Klebsiella	Klebsiella pneumoniae	AR_0146	NZ_CP021686.1	183376	51.1	tet(A) mphA	IncFI(RepB) pCD1	MOBF,MOBF	MPF_F		conjugative	order	REBASE:M.BstXI	sopB sopB	psiB_ECOLX	traN_F	hok(hok) STM3651 XOC_RS18085	STM3652		ibeB
Klebsiella	Klebsiella pneumoniae	AR_0146	NZ_CP021687.1	96814	53.23	BRP(MBL) NDM-1 AAC(6')-Ib10	IncT	MOBP	MPF_I		conjugative	order					D616_p97105 XOC_RS18085	D616_p97106
Klebsiella	Klebsiella pneumoniae	AR_0146	NZ_CP021688.1	90199	51.9	QnrB6 dfrA14 catII_K12 AAC(6')-Ib-cr6 OXA-1 CTX-M-15 sul2 APH(3'')-Ib APH(6)-Id	IncFI(RepE) IncR			MOBF	mobilizable	order	REBASE:M.EcoRII	ParB
Escherichia	Escherichia coli	AR_0058	NZ_CP021690.1	163045	51.06	dfrA17 aadA5 qacEdelta1 sul1 mphA sul2 APH(3'')-Ib APH(6)-Id tet(A) AAC(3)-IId TEM-20 TEM-20 TEM-20 TEM-20 TEM-20 TEM-20 TEM-20	IncFI(RepE) IncFI(RepB) pCD1	MOBF,MOBP	MPF_F	MOBF	conjugative	order		sopB sopB	psiB_ECOLX	traN_F	D616_p97105 XOC_RS18085 D616_p97086(srnB) XOC_RS18085	D616_p97106	NG_034386.1	AAA92657 senB
Escherichia	Escherichia coli	AR_0151	NZ_CP021692.1	46161	46.65	BRP(MBL) NDM-5		MOBP	MPF_T		conjugative	order					XOC_RS18085
Escherichia	Escherichia coli	AR_0151	NZ_CP021693.1	50228	50.75	TEM-1 CMY-42	IncFII(RepA1)	MOBP	MPF_I	MOBP	conjugative	order			psiB_ECOLX psiA		D616_p112058(pndA)		NC_023329.1
Proteus	Proteus mirabilis	AR_0155	NZ_CP021695.1	214441	51.67	sul2 floR APH(3')-Ia sul2 KPC-6 sul1 qacEdelta1 aadA5 dfrA17	IncA/C (=IncP-3)	MOBC,MOBH,MOBH	MPF_F	MOBH	conjugative	phylum					XOC_RS18085
Klebsiella	Klebsiella pneumoniae	AR_0158	NZ_CP021697.1	191266	49.78		IncFI(RepB)				non-mobilizable	phylum		sopB sopB			XOC_RS18085 STM4031 XOC_RS18085			PA3142 pla PA3142 ibeB
Klebsiella	Klebsiella pneumoniae	AR_0158	NZ_CP021698.1	87411	51.92	sul2 APH(3'')-Ib APH(6)-Id TEM-1 CTX-M-15 dfrA14	IncR			MOBF	mobilizable	order		ParB			D616_p97105	D616_p97106		PA3142
Klebsiella	Klebsiella pneumoniae	AR_0158	NZ_CP021699.1	354705	47.85	adeF NDM-1 BRP(MBL) tetR tet(B) OXA-1 AAC(6')-Ib-cr6 QnrB1 QnrB1 AAC(3)-IId SHV-2A qacE dfrA30		MOBH	MPF_F		conjugative	order	REBASE:M.Pae10332II				XOC_RS18085 XOC_RS18085 XOC_RS18085 hok(hok) b1563 b1563 b2005(yeeV)	b1564 VCA0445 b2004(yeeU)		adeG htpB PA3142 lpxC
Klebsiella	Klebsiella pneumoniae	AR_0158	NZ_CP021700.1	8364	49.23						non-mobilizable	multi-phylla
Escherichia	Escherichia coli	AR_0128	NZ_CP021719.1	128094	51.59	rmtC sul1 qacEdelta1 AAC(6')-Ib10 CMY-6	IncA/C (=IncP-3)	MOBH,MOBH	MPF_F	MOBH	conjugative	phylum	REBASE:M.EaeI(M.EaeIB) REBASE:M3.BstXII
Escherichia	Escherichia coli	AR_0128	NZ_CP021720.1	216378	50.69	BRP(MBL) NDM-1	IncFI(RepE) IncT	MOBP	MPF_I		conjugative	order	REBASE:M.PfrJS9II	ParM			XOC_RS18085 VCA0391 D616_p97105	D616_p97106		mrkJ mrkF htpB
Escherichia	Escherichia coli	AR_0128	NZ_CP021721.1	9396	46.57		Rep(pSC101)	MOBQ			mobilizable	order
Klebsiella	Klebsiella pneumoniae	AR_0129	NZ_CP021713.1	208224	52.88	APH(3')-Ia mphA sul1 qacEdelta1 aadA2 dfrA12 catI	pCD1 IncFI(RepB)	MOBF,MOBF	MPF_F		conjugative	order		sopB sopB	psiB_ECOLX	traN_F	hok(hok) STM3651 XOC_RS18085	STM3652		ibeB
Klebsiella	Klebsiella pneumoniae	AR_0129	NZ_CP021714.1	106541	49.5		IncFI(RepB)				non-mobilizable	order
Klebsiella	Klebsiella pneumoniae	AR_0129	NZ_CP021715.1	43378	46.84	SHV-12		MOBP	MPF_T		conjugative	order
Klebsiella	Klebsiella pneumoniae	AR_0129	NZ_CP021716.1	43500	48.31	KPC-3 TEM-163		MOBC			mobilizable	order
Klebsiella	Klebsiella pneumoniae	AR_0129	NZ_CP021717.1	15271	53.47	AAC(6')-Ib10		MOBC			mobilizable	order
Klebsiella	Klebsiella pneumoniae	AR_0143	NZ_CP021709.1	186758	50.84	CMY-4 NDM-1 BRP(MBL) sul1 armA msrE mphE	GR5 IncA/C (=IncP-3)	MOBH,MOBH	MPF_F	MOBH	conjugative	phylum
Klebsiella	Klebsiella pneumoniae	AR_0143	NZ_CP021710.1	214114	52.34	catI	pCD1 IncFI(RepB)	MOBF,MOBF	MPF_F		conjugative	order		sopB sopB	psiB_ECOLX	traN_F	STM3651 XOC_RS18085 hok(hok) XOC_RS18085	STM3652		ibeB
Klebsiella	Klebsiella pneumoniae	AR_0143	NZ_CP021711.1	78638	51.77	CTX-M-15 TEM-1	pCD1	MOBF	MPF_F	MOBP	conjugative	order		ParM	psiB_ECOLX	traN_F			NG_034386.1
Klebsiella	Klebsiella pneumoniae	AR_0143	NZ_CP021712.1	70457	52.9	ANT(3'')-IIa cmlA5 qacEdelta1 sul1 AAC(6')-Ib10 ANT(3'')-IIa OXA-9 TEM-1 sul2 APH(3'')-Ib APH(6)-Id CTX-M-15 AAC(3)-IId SHV-11 arr-2	IncR IncFI(RepE)			MOBF	mobilizable	order		ParB			XOC_RS18085
Escherichia	Escherichia coli	AR_0114	NZ_CP021733.1	114267	51.66	sul1 qacEdelta1 cmlA6 ANT(3'')-IIa ANT(2'')-Ia TEM-1 sul2 APH(3'')-Ib APH(6)-Id	IncFI(RepE) IncFI(RepB) IncZ IncZ	MOBF	MPF_F	MOBF	conjugative	order		sopB sopB	psiB_ECOLX	traN_F	D616_p97105 D616_p97086(srnB)	D616_p97106	NC_002483.1
Escherichia	Escherichia coli	AR_0114	NZ_CP021734.1	85195	53.74	TEM-1 KPC-3 sul1 qacEdelta1 dfrA5	IncT IncN	MOBC	MPF_T		conjugative	class					ST585_p263
Escherichia	Escherichia coli	AR_0114	NZ_CP021735.1	31765	41.33			MOBP	MPF_T		conjugative	family
Escherichia	Escherichia coli	AR_0150	NZ_CP021737.1	117703	52.98	tet(A) dfrA17 aadA5 qacEdelta1 sul1 mphA	IncZ IncFI(RepE)	MOBF	MPF_F		conjugative	order		sopB sopB		traN_F	STM3033 XOC_RS18085 D616_p97086(srnB) D616_p97105	STM3034 D616_p97106	NC_002483.1
Escherichia	Escherichia coli	AR_0150	NZ_CP021738.1	46159	46.65	BRP(MBL) NDM-5		MOBP	MPF_T		conjugative	order					XOC_RS18085
Escherichia	Escherichia coli	AR_0150	NZ_CP021739.1	50235	50.74	CMY-42 TEM-1	IncFII(RepA1)	MOBP	MPF_I	MOBP	conjugative	order			psiA psiB_ECOLX		D616_p112058(pndA)		NC_023329.1
Klebsiella	Klebsiella pneumoniae	AR_0126	NZ_CP021741.1	89621	54.81	dfrA1 ANT(3'')-IIa qacEdelta1 sul1	IncR				non-mobilizable	order		ParB	psiB_ECOLX		D616_p97105 hok(hok)	D616_p97106	NG_034386.1
Klebsiella	Klebsiella pneumoniae	AR_0126	NZ_CP021742.1	76179	52.69	SHV-30 sul1 qacEdelta1 arr-3 catB3 OXA-1 AAC(6')-Ib-cr6	IncL/M	MOBP	MPF_I		conjugative	phylum
Klebsiella	Klebsiella pneumoniae	AR_0126	NZ_CP021743.1	43620	48.27	KPC-2 TEM-1		MOBC			mobilizable	order
Klebsiella	Klebsiella pneumoniae	AR_0113	NZ_CP021752.1	209550	52.85	APH(3')-Ia mphA sul1 qacEdelta1 aadA2 dfrA12 catI	pCD1 IncFI(RepB)	MOBF,MOBF	MPF_F		conjugative	order		sopB sopB	psiB_ECOLX	traN_F	hok(hok) STM3651 XOC_RS18085	STM3652		ibeB
Klebsiella	Klebsiella pneumoniae	AR_0113	NZ_CP021753.1	116187	53.31		IncFII(RepA1) IncT	MOBF	MPF_F		conjugative	order			psiB_ECOLX	traN_F	D616_p97105	D616_p97106
Klebsiella	Klebsiella pneumoniae	AR_0113	NZ_CP021754.1	74751	45.21	KPC-3 TEM-1	IncFII(RepA1)	MOBP	MPF_T		conjugative	family				pilV_KLPN pilS_TP114
Klebsiella	Klebsiella pneumoniae	AR_0113	NZ_CP021755.1	45740	53.26	AAC(6')-Ib10 aadA2 cmlA1 ANT(3'')-IIa qacL sul3 AAC(3)-IV APH(4)-Ia	IncR			MOBF	mobilizable	order		ParB
Klebsiella	Klebsiella pneumoniae	AR_0113	NZ_CP021756.1	22632	57.4	AAC(6')-Ib10 KPC-3		MOBC			mobilizable	class
Enterobacter	Enterobacter cloacae complex sp.	AR_0163	NZ_CP021750.1	43620	48.27	KPC-2 TEM-1		MOBC			mobilizable	order
Klebsiella	Klebsiella pneumoniae	AR_0138	NZ_CP021758.1	121057	53.24	arr-2 AAC(6')-Ib rmtF	IncT	MOBP	MPF_I		conjugative	order					D616_p97105	D616_p97106
Klebsiella	Klebsiella pneumoniae	AR_0138	NZ_CP021759.1	46161	46.65	BRP(MBL) NDM-7		MOBP	MPF_T		conjugative	order					XOC_RS18085
Klebsiella	Klebsiella pneumoniae	AR_0138	NZ_CP021760.1	54404	53.18						non-mobilizable	family
Klebsiella	Klebsiella pneumoniae	AR_0138	NZ_CP021761.1	79767	52.48	APH(3'')-Ib APH(6)-Id sul2 APH(3'')-Ib APH(6)-Id TEM-1 dfrA14 CTX-M-15 mphA sul1 qacEdelta1 aadA2 dfrA12 catII_K12 QnrB1	IncR				non-mobilizable	order	REBASE:M.EcoRII	ParB						PA3142
Enterobacter	Enterobacter cloacae complex sp.	AR_0053	NZ_CP021777.1	70882	54.76		IncT IncFII(RepA1)	MOBF	MPF_F		conjugative	order		ParM
Enterobacter	Enterobacter cloacae complex sp.	AR_0053	NZ_CP021778.1	71949	53.92	dfrA14 sul2 APH(3'')-Ib APH(6)-Id TEM-1 OXA-9 ANT(3'')-IIa AAC(6')-Ib9 KPC-3	IncFI(RepE)				non-mobilizable	order		ParB	psiB_ECOLX
Enterobacter	Enterobacter cloacae complex sp.	AR_0053	NZ_CP021779.1	15028	53.59	AAC(6')-Ib10		MOBC			mobilizable	order
Klebsiella	Klebsiella pneumoniae	AR_0120	NZ_CP021834.1	212837	52.78	APH(3')-Ia mphA sul1 qacEdelta1 aadA2 dfrA12	IncFI(RepB) pCD1	MOBF,MOBF	MPF_F		conjugative	order		sopB sopB	psiB_ECOLX	traN_F	hok(hok) STM3651 XOC_RS18085	STM3652		ibeB
Klebsiella	Klebsiella pneumoniae	AR_0120	NZ_CP021835.1	210045	53.25	floR sul2 KPC-2 sul1 qacEdelta1 AAC(6')-33 ANT(2'')-Ia TEM-1	IncA/C (=IncP-3)	MOBH,MOBH	MPF_F	MOBH	conjugative	phylum	REBASE:M.XmnI				XOC_RS18085
Klebsiella	Klebsiella pneumoniae	AR_0120	NZ_CP021836.1	43378	46.84	SHV-11		MOBP	MPF_T		conjugative	order
Klebsiella	Klebsiella pneumoniae	AR_0120	NZ_CP021837.1	15271	53.47	AAC(6')-Ib10		MOBC			mobilizable	order
Proteus	Proteus mirabilis	AR_0156	NZ_CP021853.1	180262	53.24	qacEdelta1 sul1 KPC-2 AAC(6')-Ib10 tet(D) floR sul2 dfrA14 arr-2 cmlA5 OXA-10	IncA/C (=IncP-3)	MOBH,MOBH	MPF_F	MOBH	conjugative	phylum	REBASE:M.NgoMV
Proteus	Proteus mirabilis	AR_0156	NZ_CP021854.1	26816	40.78			MOBC			mobilizable	order
Proteus	Proteus mirabilis	AR_0156	NZ_CP021855.1	23946	33.06			MOBP			mobilizable	family					b1563 D616_p97086(srnB)	VCA0445
Klebsiella	Klebsiella pneumoniae	AR_0125	NZ_CP021856.1	146168	53.02	dfrA12 aadA2 qacEdelta1 sul1 mphA APH(3')-Ia catI	IncFI(RepB)				non-mobilizable	order		sopB sopB			XOC_RS18085 STM3651	STM3652		ibeB
Klebsiella	Klebsiella pneumoniae	AR_0125	NZ_CP021857.1	106331	54.12	SHV-12	IncFII(RepA1) IncT	MOBF	MPF_F		conjugative	order			psiB_ECOLX	traN_F	D616_p97105	D616_p97106
Klebsiella	Klebsiella pneumoniae	AR_0125	NZ_CP021858.1	47277	53.74	APH(4)-Ia AAC(3)-IV sul3 qacL ANT(3'')-IIa cmlA1 aadA2	IncR			MOBF	mobilizable	order		ParB
Klebsiella	Klebsiella pneumoniae	AR_0125	NZ_CP021860.1	24749	56.59	KPC-3 AAC(6')-Ib10		MOBC			mobilizable	class
Klebsiella	Klebsiella pneumoniae	AR_0125	NZ_CP021861.1	79489	45.62	TEM-1 OXA-9 ANT(3'')-IIa AAC(6')-Ib9 KPC-3	IncFII(RepA1)	MOBP	MPF_T		conjugative	family				pilS_TP114 pilV_KLPN
Enterobacter	Enterobacter cloacae complex sp.	AR_0050	NZ_CP021897.1	112496	51.89	dfrA15 qacEdelta1 sul1	IncFI(RepB)				non-mobilizable	order
Enterobacter	Enterobacter cloacae complex sp.	AR_0050	NZ_CP021898.1	106696	51.9	QnrS1 LAP-2	pCD1	MOBP		MOB_unknown	mobilizable	family					hok(hok)		NG_034386.1	pilQ
Enterobacter	Enterobacter cloacae complex sp.	AR_0050	NZ_CP021899.1	69635	54.29	APH(3')-Ia TEM-1 KPC-4 sul1 qacEdelta1 qacL AAC(3)-Ib dfrA14	IncN	MOBF	MPF_T	MOBF	conjugative	class
Escherichia	Escherichia coli	AR_0137	NZ_CP021880.1	169449	51.64	AAC(6')-Ib-cr6 OXA-1 AAC(3)-IIe CTX-M-15 dfrA17 aadA5 qacEdelta1 sul1 mphA tetR tet(B)	IncFI(RepB) IncFI(RepE) IncZ IncZ	MOBF	MPF_F	MOBF	conjugative	order		sopB sopB	psiB_ECOLX	traN_F	D616_p97105 D616_p97086(srnB)	D616_p97106	NC_002483.1	iucA iucB iucC iucD iutA
Escherichia	Escherichia coli	AR_0137	NZ_CP021881.1	101165	51.99	TEM-1 OXA-9 ANT(3'')-IIa AAC(6')-Ib10 CTX-M-15 QnrS1 APH(3')-VI NDM-6 BRP(MBL)	pCD1 IncR	MOBF	MPF_T	MOBF	conjugative	class		ParB
Escherichia	Escherichia coli	AR_0137	NZ_CP021882.1	67973	48.87	CMY-42	IncK	MOBP	MPF_I	MOBP	conjugative	order			psiB_ECOLX psiA	pilV_KLPN	D616_p112058(pndA)		NC_023329.1	pilQ pilS pilV
Escherichia	Escherichia coli	AR_0055	NZ_CP021936.1	138340	51.96	CMY-6 AAC(6')-Ib10 qacEdelta1 sul1 rmtC NDM-1 BRP(MBL)	IncA/C (=IncP-3)	MOBH,MOBH	MPF_F	MOBH	conjugative	phylum								htpB
Escherichia	Escherichia coli	AR_0055	NZ_CP021937.1	151110	54.5	mphA sul1 qacEdelta1 aadA5 dfrA17 dfrA17 aadA5 qacEdelta1 sul1 mphA AAC(3)-IIe tet(A) AAC(6')-Ib-cr6 OXA-1 sul1 qacEdelta1 aadA5 dfrA17 dfrA17 aadA5 qacEdelta1 sul1 mphA	IncFI(RepE) pCD1	MOBF			mobilizable	order		sopB sopB			D616_p97105	D616_p97106
Escherichia	Escherichia coli	AR_0055	NZ_CP021938.1	75318	51.66		IncZ	MOBF	MPF_F	MOBF	conjugative	order			psiB_ECOLX	traN_F	D616_p97105 D616_p97086(srnB)	D616_p97106	NG_034386.1
Klebsiella	Klebsiella pneumoniae	AR_0139	NZ_CP021958.1	128920	51.12	arr-2 cmlA5 OXA-10 ANT(3'')-IIa qacEdelta1 sul1 armA msrE mphE	GR5				non-mobilizable	class								ibeB
Klebsiella	Klebsiella pneumoniae	AR_0139	NZ_CP021959.1	89382	52.82	CTX-M-15	IncK IncT	MOBF,MOBF	MPF_F		conjugative	order			psiB_ECOLX	traN_F	XOC_RS18085 D616_p97105	D616_p97106
Klebsiella	Klebsiella pneumoniae	AR_0139	NZ_CP021961.1	97389	52.88	APH(3')-VI NDM-1 BRP(MBL) tet(A) arr-2 cmlA5 OXA-10 ANT(3'')-IIa qacEdelta1 sul1	IncFI(RepB)				non-mobilizable	order		sopB sopB			XOC_RS18085			htpB
Klebsiella	Klebsiella pneumoniae	AR_0139	NZ_CP021962.1	132217	49.12	NDM-1 BRP(MBL)	IncFI(RepB)				non-mobilizable	order								htpB
Klebsiella	Klebsiella pneumoniae	AR_0145	NZ_CP021940.1	112868	48.96		IncFI(RepB)				non-mobilizable	order	REBASE:M.PfrJS9III
Klebsiella	Klebsiella pneumoniae	AR_0145	NZ_CP021941.1	54064	52.29	BRP(MBL) NDM-1 APH(3')-VI QnrS1 CTX-M-15 sul1 qacEdelta1 arr-3 catB3 OXA-1 AAC(6')-Ib-cr6					non-mobilizable	order
Klebsiella	Klebsiella pneumoniae	AR_0145	NZ_CP021942.1	76739	52.28						non-mobilizable	family	REBASE:M.EcoGII
Klebsiella	Klebsiella pneumoniae	AR_0145	NZ_CP021943.1	38384	51.76	TEM-1 OXA-9 ANT(3'')-IIa AAC(6')-Ib10	IncR			MOBF	mobilizable	order		ParB
Klebsiella	Klebsiella pneumoniae	AR_0152	NZ_CP021945.1	112868	48.96		IncFI(RepB)				non-mobilizable	order	REBASE:M.PfrJS9III
Klebsiella	Klebsiella pneumoniae	AR_0152	NZ_CP021946.1	120345	53.58	QnrS1 LAP-2 tet(A) floR sul2 dfrA14	IncK IncT	MOBF,MOBF	MPF_F		conjugative	order			psiB_ECOLX	traN_F
Klebsiella	Klebsiella pneumoniae	AR_0152	NZ_CP021947.1	54064	52.29	NDM-1 BRP(MBL) AAC(6')-Ib-cr6 OXA-1 catB3 arr-3 qacEdelta1 sul1 CTX-M-15 QnrS1					non-mobilizable	order
Klebsiella	Klebsiella pneumoniae	AR_0152	NZ_CP021948.1	38384	51.76	TEM-1 OXA-9 ANT(3'')-IIa AAC(6')-Ib10	IncR			MOBF	mobilizable	order		ParB
Klebsiella	Klebsiella pneumoniae	AR_0152	NZ_CP021949.1	81698	52.72						non-mobilizable	family
Klebsiella	Klebsiella pneumoniae	AR_0148	NZ_CP021951.1	181589	51.08	mphA tet(A)	pCD1 IncFI(RepB)	MOBF,MOBF	MPF_F		conjugative	order	REBASE:M.BstXI	sopB sopB		traN_F	XOC_RS18085 STM3651 hok(hok)	STM3652		ibeB
Klebsiella	Klebsiella pneumoniae	AR_0148	NZ_CP021952.1	176349	51.94	AAC(6')-Ib10 qacEdelta1 sul1 SHV-11 AAC(3)-IId sul1 BRP(MBL) NDM-1 rmtC QnrB6 CMY-6	IncFI(RepE) IncA/C (=IncP-3)	MOBH,MOBH	MPF_F	MOBF,MOBH	conjugative	phylum	REBASE:M3.BstXII REBASE:M.XmnI
Klebsiella	Klebsiella pneumoniae	AR_0148	NZ_CP021953.1	69541	52.96	sul2 APH(3'')-Ib APH(6)-Id TEM-1 CTX-M-15 AAC(3)-IIe OXA-1 AAC(6')-Ib-cr6 dfrA14 AAC(6')-Ib10	IncR				non-mobilizable	order		ParB
Klebsiella	Klebsiella pneumoniae	AR_0148	NZ_CP021954.1	42816	34.72						non-mobilizable	order
Klebsiella	Klebsiella pneumoniae	AR_0107	NZ_CP021956.1	153527	51.71	AAC(6')-Ib9 ANT(3'')-IIa OXA-9 TEM-1 arr-2 cmlA5 OXA-10 ANT(3'')-IIa qacEdelta1 sul1 OXA-10 ANT(3'')-IIa qacEdelta1 sul1 CTX-M-2 qacEdelta1 rmtG sul2	IncA/C (=IncP-3)	MOBH,MOBH	MPF_F	MOBH	conjugative	phylum
Klebsiella	Klebsiella pneumoniae	AR_0107	NZ_CP021957.1	72122	52.98						non-mobilizable	family
Enterobacter	Enterobacter cloacae complex sp.	AR_0136	NZ_CP021900.1	63482	54.31	sul2 APH(3'')-Ib APH(6)-Id TEM-1 OXA-9 ANT(3'')-IIa AAC(6')-Ib9 KPC-3	IncFI(RepE)				non-mobilizable	order		ParB	psiB_ECOLX
Enterobacter	Enterobacter cloacae complex sp.	AR_0136	NZ_CP021901.1	43379	46.83	SHV-12		MOBP	MPF_T		conjugative	order
Escherichia	Escherichia coli	AR_0006	NZ_CP024852.1	167974	50.15	tet(A) APH(6)-Id APH(3'')-Ib sul2 CTX-M-14 qacEdelta1 cmlA5 AAC(6')-Ib10 AAC(3)-IIe mphA sul1 qacEdelta1 aadA5 dfrA17 TEM-1	IncQ (=IncP-4) IncZ IncZ IncFI(RepB)	MOBF	MPF_F	MOBF	conjugative	phylum		sopB sopB	psiB_ECOLX	traN_F	D616_p97086(srnB)		NC_002483.1	mig-14
Escherichia	Escherichia coli	AR_0006	NZ_CP024853.1	35812	48.8			MOBF	MPF_T		conjugative	class					b2782
Escherichia	Escherichia coli	AR_0006	NZ_CP024854.1	96413	50.27	CMY-2	IncK	MOBP	MPF_I	MOBP	conjugative	order			psiB_ECOLX psiA	pilV_KLPN	D616_p112058(pndA)		NC_023329.1	pilV pilS pilQ
Escherichia	Escherichia coli	AR_0014	NZ_CP024860.1	172588	51.9	tet(A) CTX-M-15 AAC(3)-IIe OXA-1 AAC(6')-Ib-cr6	IncZ IncZ IncFI(RepB) IncFI(RepE)	MOBF,MOBP	MPF_F	MOBF	conjugative	order		sopB sopB	psiB_ECOLX	traN_F	D616_p97086(srnB) D616_p97105	D616_p97106	NC_002483.1	senB iucA iucB iucC iucD iutA
Escherichia	Escherichia coli	AR_0014	NZ_CP024861.1	33548	41.31			MOBP	MPF_T		conjugative	family
Escherichia	Escherichia coli	AR_0015	NZ_CP024863.1	139059	51.53	tetR tet(B) dfrA17 aadA5 qacEdelta1 sul1 dfrA17 aadA5 qacEdelta1 sul1 AAC(6')-Ib-cr6 OXA-1 CTX-M-15 TEM-1 mphA APH(6)-Id APH(3'')-Ib sul2 TEM-1 AAC(3)-IId	IncFI(RepE) IncFI(RepB) IncQ (=IncP-4) pCD1	MOBF	MPF_F	MOBF	conjugative	phylum	REBASE:M.XphI	sopB sopB	psiB_ECOLX		D616_p97105 D616_p97086(srnB)	D616_p97106	NC_002483.1	AAA92657
Escherichia	Escherichia coli	AR_0015	NZ_CP024864.1	88768	52.16	tet(A) TEM-169	IncZ	MOBF	MPF_F		conjugative	order			psiB_ECOLX		STM3033 hok(hok)	STM3034	NG_034386.1
Escherichia	Escherichia coli	AR_0015	NZ_CP024865.1	48511	44.72						non-mobilizable	genus
Escherichia	Escherichia coli	AR_0011	NZ_CP024856.1	181436	51.71	AAC(6')-Ib-cr6 OXA-1 AAC(3)-IIe CTX-M-15 tet(A)	IncFI(RepE) IncFI(RepB) ColE3 IncZ IncZ	MOBF,MOBP	MPF_F	MOBF	conjugative	order		sopB sopB	psiB_ECOLX	traN_F	D616_p97105 D616_p97086(srnB)	D616_p97106	NC_002483.1	iutA iucD iucC iucB iucA senB
Escherichia	Escherichia coli	AR_0011	NZ_CP024857.1	76680	50.99	APH(6)-Id APH(3'')-Ib sul2	IncR			MOBF	mobilizable	order		ParB						PA3142
Escherichia	Escherichia coli	AR_0011	NZ_CP024858.1	57991	42.13		IncFII(RepA1)	MOBP	MPF_T		conjugative	family				pilS_TP114 pilV_KLPN
Escherichia	Escherichia coli	AR_0019	NZ_CP024888.1	76754	50.87	TEM-1	pCD1	MOBF	MPF_F	MOBF	conjugative	order	REBASE:M.EcoGIX	ParM	psiB_ECOLX	traN_F	D616_p97086(srnB)		NG_034386.1
Citrobacter	Citrobacter freundii	AR_0022	NZ_CP024882.1	115736	48.4		pCD1 IncFI(RepE)		MPF_F		non-mobilizable	order		ParM			b1563 hok(hok)	b1564	NG_034386.1	ibeB
Klebsiella	Klebsiella aerogenes	AR_0009	NZ_CP024884.1	9294	55.18			MOBC			mobilizable	order
Escherichia	Escherichia coli	AR_0017	NZ_CP024887.1	102544	51.46		IncZ IncFI(RepB)	MOBP	MPF_I	MOBP	conjugative	order			psiB_ECOLX psiA	pilV_KLPN	D616_p112058(pndA) D616_p97105	D616_p97106		clbS
Citrobacter	Citrobacter koseri	AR_0025	NZ_CP026698.1	82058	54.36		pCD1 IncFI(RepB)	MOBF	MPF_F		conjugative	order		sopB	psiB_ECOLX	traN_F	Z4832	Z4833
Citrobacter	Citrobacter koseri	AR_0025	NZ_CP026699.1	42930	47.17		pCD1	MOBF			mobilizable	order
Salmonella	Salmonella enterica subsp. enterica serovar Typhimurium	AR_0031	NZ_CP026701.1	93832	53.12		pCD1 IncFI(RepB)	MOBF	MPF_F		conjugative	order	REBASE:M.EcoGIX	ParB	psiB_ECOLX	traN_F	STM3033 D616_p97105	STM3034 D616_p97106		AAA92657 rck pefD pefC pefA pefB spvD ospF spvB mig-5
Serratia	Serratia marcescens	AR_0027	NZ_CP026703.1	22569	65.15			MOBQ			mobilizable	phylum
Acinetobacter	Acinetobacter baumannii	AR_0056	NZ_CP026705.1	113706	42.79	mphE msrE					non-mobilizable	genus
Acinetobacter	Acinetobacter baumannii	AR_0056	NZ_CP026706.1	72105	33.62	OXA-23	GR6	MOBF	MPF_F		conjugative	genus
Acinetobacter	Acinetobacter baumannii	AR_0056	NZ_CP026708.1	8731	34.37		GR2 GR10				non-mobilizable	genus
Klebsiella	Klebsiella oxytoca	AR_0028	NZ_CP026716.1	189585	51.14		pCD1 IncFI(RepB)				non-mobilizable	order		sopB sopB			STM3651	STM3652		PA3142 ibeB
Klebsiella	Klebsiella oxytoca	AR_0028	NZ_CP026717.1	80970	56.88		pCD1	MOBF,MOBF	MPF_F		conjugative	order				traN_F
Klebsiella	Klebsiella oxytoca	AR_0028	NZ_CP026718.1	91175	50.64		pCD1 IncN	MOBF	MPF_F		conjugative	order					XOC_RS18085 STM3651	STM3652
Citrobacter	Citrobacter koseri	AR_0024	NZ_CP026710.1	9294	55.15			MOBC			mobilizable	order
Enterobacter	Enterobacter cloacae complex sp.	AR_0060	NZ_CP026720.1	77822	53.8		IncR				non-mobilizable	order	REBASE:M.Pae10332II	ParB			XOC_RS18085 D616_p97105 XOC_RS18085	D616_p97106		mrkC mrkB mrkA PA3142 mrkF
Acinetobacter	Acinetobacter baumannii	AR_0063	NZ_CP026712.1	72990	33.63	OXA-23	GR6	MOBF	MPF_F		conjugative	genus
Klebsiella	Klebsiella pneumoniae	AR_0066	NZ_CP026752.1	211813	52.36	catI	IncFI(RepB) pCD1	MOBF,MOBF	MPF_F		conjugative	order		sopB sopB	psiB_ECOLX	traN_F	XOC_RS18085 STM3651 hok(hok)	STM3652		ibeB
Klebsiella	Klebsiella pneumoniae	AR_0066	NZ_CP026753.1	70730	52.83	arr-2 EreA2 ANT(3'')-IIa cmlA5 qacEdelta1 sul1 APH(6)-Id APH(3'')-Ib sul2 TEM-1 OXA-9 ANT(3'')-IIa AAC(6')-Ib10 CTX-M-15 AAC(3)-IId SHV-11	IncR IncFI(RepE)			MOBF	mobilizable	order		ParB			XOC_RS18085
Escherichia	Escherichia coli	AR_0077	NZ_CP026754.1	90045	50.75		IncFI(RepE) IncZ	MOBF	MPF_F	MOBF	conjugative	order	REBASE:M.EcoGIX		psiB_ECOLX	traN_F	D616_p97105 D616_p97086(srnB) STM3033	D616_p97106 STM3034	NC_002483.1
Klebsiella	Klebsiella aerogenes	AR_0062	NZ_CP026760.1	67494	51.58						non-mobilizable	family
Klebsiella	Klebsiella aerogenes	AR_0062	NZ_CP032930.1	9294	55.15			MOBC			mobilizable	order
Klebsiella	Klebsiella aerogenes	AR_0062	NZ_CP026757.1	54418	52.15	tet(A) dfrA12 aadA2 qacEdelta1 sul1	IncN	MOBF	MPF_T	MOBF	conjugative	class					XOC_RS18085
Klebsiella	Klebsiella aerogenes	AR_0062	NZ_CP026758.1	32789	44.48			MOBP	MPF_T		conjugative	order
Klebsiella	Klebsiella aerogenes	AR_0062	NZ_CP026759.1	25674	40.18		pCD1	MOBC			mobilizable	order
Enterobacter	Enterobacter cloacae complex sp.	AR_0072	NZ_CP026851.1	150426	54.1		IncFII(RepA1) IncFI(RepB) IncK	MOBF	MPF_T		conjugative	order		sopB			b1563 STM3651	b1564 STM3652		PA3142 PA3142 ibeB
Enterobacter	Enterobacter cloacae complex sp.	AR_0072	NZ_CP026852.1	41246	51.21		IncR			MOBF	mobilizable	order		ParB
Enterobacter	Enterobacter hormaechei subsp. hoffmannii	AR_0365	NZ_CP027144.1	328871	49.15	sul2 sul1 qacEdelta1 EreA2 AAC(3)-IIg AAC(6')-IIc ANT(3'')-IIa qacEdelta1 sul1 dfrA19 APH(3'')-Ib APH(6)-Id MCR-9.1 AAC(6')-Ib10	IncP-2 IncH IncS (=IncHI2)	MOBH,MOBP	MPF_F	MOBH	conjugative	multi-phylla					XOC_RS18085 HP0894 XOC_RS18085 hok(hok) b1563	b1564
Enterobacter	Enterobacter hormaechei subsp. hoffmannii	AR_0365	NZ_CP027145.1	101548	54.44		IncK IncN	MOBF	MPF_F		conjugative	order					hok(hok)
Enterobacter	Enterobacter hormaechei subsp. hoffmannii	AR_0365	NZ_CP027143.1	51949	48.1	KPC-2 QnrS1		MOBC			mobilizable	order
Enterobacter	Enterobacter hormaechei subsp. hoffmannii	AR_0365	NZ_CP027141.1	4604	51.17			MOBP,MOBP		MOBP	mobilizable	multi-phylla
Klebsiella	Klebsiella pneumoniae	AR_0363	NZ_CP027152.1	208849	52.9	catI dfrA12 qacEdelta1 sul1 mphA APH(3')-Ia	IncFI(RepB) pCD1	MOBF,MOBF	MPF_F		conjugative	order	REBASE:M.Mhy14884I	sopB sopB	psiB_ECOLX	traN_F	hok(hok) XOC_RS18085 STM3651	STM3652		ibeB
Klebsiella	Klebsiella pneumoniae	AR_0363	NZ_CP027147.1	4223	48.85						non-mobilizable
Klebsiella	Klebsiella pneumoniae	AR_0363	NZ_CP027150.1	65684	55.3	AAC(6')-Ib10 aadA2 cmlA1 ANT(3'')-IIa qacL AAC(3)-IV APH(4)-Ia KPC-2	IncR			MOBF	mobilizable	order		ParB			XOC_RS18085
Klebsiella	Klebsiella pneumoniae	AR_0363	NZ_CP027156.1	184525	44.6	AAC(6')-Ib10		MOBH	MPF_F		conjugative	order	REBASE:M.Pae10332II				hok(hok)
Klebsiella	Klebsiella pneumoniae	AR_0363	NZ_CP027148.1	47286	51.47	AAC(6')-Ib10	IncL/M	MOBP	MPF_I		conjugative	phylum
Klebsiella	Klebsiella pneumoniae	AR_0363	NZ_CP027155.1	49000	50						non-mobilizable	genus
Klebsiella	Klebsiella pneumoniae	AR_0363	NZ_CP027153.1	6547	45.72						non-mobilizable
Klebsiella	Klebsiella pneumoniae	AR_0363	NZ_CP027149.1	33772	49.26	AAC(6')-Ib10	IncFI(RepB)				non-mobilizable	order
Klebsiella	Klebsiella pneumoniae	AR_0363	NZ_CP027154.1	11576	54.49						non-mobilizable	family
Klebsiella	Klebsiella pneumoniae	AR_0363	NZ_CP027151.1	6451	51.99						non-mobilizable
Klebsiella	Klebsiella pneumoniae	AR_0361	NZ_CP027161.1	207543	52.9	APH(3')-Ia mphA sul1 qacEdelta1 aadA2 dfrA12 catI	IncFI(RepB) pCD1	MOBF,MOBF	MPF_F		conjugative	order		sopB sopB	psiB_ECOLX	traN_F	hok(hok) STM3651 XOC_RS18085	STM3652		ibeB
Klebsiella	Klebsiella pneumoniae	AR_0361	NZ_CP027158.1	113639	53.93	TEM-1 KPC-2	pCD1	MOBF,MOBF	MPF_F		conjugative	order	REBASE:M.PfrJS9II		psiB_ECOLX	traN_F
Klebsiella	Klebsiella pneumoniae	AR_0361	NZ_CP027162.1	42420	53.25	AAC(6')-Ib10 aadA2 cmlA1 ANT(3'')-IIa qacL sul3 AAC(3)-IV APH(4)-Ia	IncR			MOBF	mobilizable	order		ParB
Klebsiella	Klebsiella pneumoniae	AR_0361	NZ_CP027164.1	5446	59.16	SHV-12					non-mobilizable	genus
Klebsiella	Klebsiella pneumoniae	AR_0361	NZ_CP027163.1	1207	48.96						non-mobilizable
Klebsiella	Klebsiella pneumoniae	AR_0361	NZ_CP027157.1	27546	45.71			MOBP	MPF_T		conjugative	order
Klebsiella	Klebsiella pneumoniae	AR_0361	NZ_CP027159.1	5563	41.94						non-mobilizable	order
Pseudomonas	Pseudomonas aeruginosa	AR_0353	NZ_CP027173.1	41559	60.8	GES-1		MOBP			mobilizable	phylum
Pseudomonas	Pseudomonas aeruginosa	AR_0230	NZ_CP027175.1	71782	59.69						non-mobilizable	genus
Pseudomonas	Pseudomonas aeruginosa	AR_0230	NZ_CP027176.1	1350	48						non-mobilizable	multi-phylla
Escherichia	Escherichia coli	AR_0369	NZ_CP027137.1	49534	46.82			MOBF	MPF_T		conjugative	class
Escherichia	Escherichia coli	AR_0369	NZ_CP027138.1	90735	43.17	TEM-1 TEM-1 dfrA8 sul3 qacL ANT(3'')-IIa SAT-2 catIII		MOBP	MPF_T	MOBP,MOBP	conjugative	order		ParG			b1563 b1563	VCA0445 VCA0445
Escherichia	Escherichia coli	AR_0369	NZ_CP027135.1	151026	49.73	AAC(6')-Ib-cr6 OXA-1 AAC(3)-IIe CTX-M-15 TEM-1	IncFI(RepB) IncK	MOBP	MPF_I	MOBP	conjugative	order			psiA psiB_ECOLX	pilV_KLPN	D616_p112058(pndA)		NC_023329.1	pilS pilV iutA iucD iucC iucB iucA pilQ pilS pilV
Escherichia	Escherichia coli	AR_0369	NZ_CP027136.1	1690	48.05			MOBV			mobilizable	order
Escherichia	Escherichia coli	AR_0369	NZ_CP027139.1	1197	49.12						non-mobilizable	order
Escherichia	Escherichia coli	AR_0372	NZ_CP027130.1	170292	51.65	tet(B) tetR mphA sul1 qacEdelta1 aadA5 dfrA17 CTX-M-15 AAC(3)-IIe OXA-1 AAC(6')-Ib-cr6	IncZ IncZ IncFI(RepE) IncFI(RepB)	MOBF	MPF_F	MOBF	conjugative	order		sopB sopB	psiB_ECOLX	traN_F	D616_p97086(srnB) D616_p97105	D616_p97106	NC_002483.1	iutA iucD iucC iucB iucA
Escherichia	Escherichia coli	AR_0372	NZ_CP027132.1	2101	47.17						non-mobilizable	family
Escherichia	Escherichia coli	AR_0372	NZ_CP027131.1	1552	51.74					MOBP,MOB_unknown	mobilizable	order
Escherichia	Escherichia coli	AR_0372	NZ_CP027133.1	97167	47.56						non-mobilizable	order		ParB
Escherichia	Escherichia coli	AR_0372	NZ_CP027129.1	5193	46.54						non-mobilizable
Pseudomonas	Pseudomonas paraeruginosa	AR_0356	NZ_CP027168.1	57053	60.86	KPC-2		MOBF	MPF_T		conjugative	genus
Pseudomonas	Pseudomonas paraeruginosa	AR_0356	NZ_CP027170.1	438531	57.14	AAC(6')-Ib9 aadA16 qacEdelta1 sul1 tet(D)	IncP-2		MPF_I		non-mobilizable	multi-phylla					XOC_RS18085			xcpA/pilD pilG csrA
Pseudomonas	Pseudomonas paraeruginosa	AR_0356	NZ_CP027167.1	165365	55.79		IncP-7	MOBH	MPF_F		conjugative	multi-phylla
Acinetobacter	Acinetobacter baumannii	AR_0083	NZ_CP027529.1	8731	34.37		GR2 GR10				non-mobilizable	genus
Escherichia	Escherichia coli	AR_0081	NZ_CP027535.1	101207	49.88	CMY-2	IncK	MOBP	MPF_I	MOBP	conjugative	order			psiA psiB_ECOLX	pilV_KLPN	D616_p112058(pndA)		NC_023329.1	pilQ pilS pilV
Escherichia	Escherichia coli	AR_0081	NZ_CP027537.1	100279	50.7	TEM-1	IncFI(RepE) pCD1	MOBF,MOBP	MPF_F	MOBF	conjugative	order	REBASE:M.XphI REBASE:M.BstXI	sopB sopB	psiB_ECOLX	traN_F	D616_p97105 XOC_RS18085 D616_p97086(srnB) XOC_RS18085	D616_p97106	NG_034386.1	AAA92657
Escherichia	Escherichia coli	AR_0081	NZ_CP027536.1	72482	50.73	TEM-1	pCD1	MOBF	MPF_F	MOBF	conjugative	order		ParM	psiB_ECOLX	traN_F traN_F	D616_p97086(srnB)		NG_034386.1
Escherichia	Escherichia coli	AR_0374	NZ_CP027128.1	1565	50.86					MOBP	mobilizable	order
Escherichia	Escherichia coli	AR_0374	NZ_CP027127.1	98987	49.94	CMY-2	IncK	MOBP	MPF_I		conjugative	order			psiA psiB_ECOLX	pilV_KLPN	D616_p97105 D616_p112058(pndA)	D616_p97106	NC_023329.1	pilQ pilS pilV
Escherichia	Escherichia coli	AR_0374	NZ_CP027125.1	44160	52.74				MPF_T	MOBF	mobilizable	class								CBU_0270
Acinetobacter	Acinetobacter baumannii	AR_0088	NZ_CP027531.1	146698	37.86	sul2 tet(B) tetR APH(6)-Id APH(3'')-Ib AAC(3)-IIe AAC(6')-Ian			MPF_I		non-mobilizable	genus	REBASE:M.TcoKWC4V
Acinetobacter	Acinetobacter baumannii	AR_0088	NZ_CP027532.1	41087	38.32	BRP(MBL) NDM-1 APH(3')-VI		MOBQ	MPF_T		conjugative	class
Acinetobacter	Acinetobacter baumannii	AR_0102	NZ_CP027608.1	106967	42.64						non-mobilizable	genus
Acinetobacter	Acinetobacter baumannii	AR_0102	NZ_CP027609.1	8731	34.37		GR19 GR10				non-mobilizable	genus
Acinetobacter	Acinetobacter baumannii	AR_0101	NZ_CP027610.1	16095	35.32		GR17	MOBQ	MPF_T		conjugative	genus
Klebsiella	Klebsiella pneumoniae subsp. ozaenae	AR_0096	NZ_CP027613.1	191856	51.59	sul1 qacEdelta1 aadA2 dfrA12 SHV-1	pCD1 IncFI(RepB)	MOBF,MOBF	MPF_F		conjugative	order		sopB sopB	psiB_ECOLX	traN_F				ibeB
Klebsiella	Klebsiella pneumoniae subsp. ozaenae	AR_0096	NZ_CP027614.1	100759	55.91		pCD1	MOBF,MOBF	MPF_F		conjugative	order			psiB_ECOLX	traN_F
Klebsiella	Klebsiella pneumoniae subsp. ozaenae	AR_0096	NZ_CP027615.1	108623	49.33		IncFI(RepB)				non-mobilizable	genus
Klebsiella	Klebsiella pneumoniae subsp. ozaenae	AR_0096	NZ_CP027616.1	129985	54.15	dfrA14 sul2 APH(3'')-Ib APH(6)-Id TEM-1 OXA-9 ANT(3'')-IIa AAC(6')-Ib9 KPC-3	IncFI(RepE) IncFII(RepA1)	MOBF,MOBF	MPF_F		conjugative	order		ParB	psiB_ECOLX	traN_F
Klebsiella	Klebsiella pneumoniae subsp. ozaenae	AR_0096	NZ_CP027617.1	54242	51.76			MOBF	MPF_T	MOBF	conjugative	class								CBU_0270
Acinetobacter	Acinetobacter baumannii	AR_0056	NZ_CP027122.1	113706	42.79	mphE msrE					non-mobilizable	genus
Acinetobacter	Acinetobacter baumannii	AR_0056	NZ_CP027121.1	72105	33.62	OXA-23	GR6	MOBF	MPF_F		conjugative	genus		incC2
Acinetobacter	Acinetobacter baumannii	AR_0056	NZ_CP027124.1	8731	34.37		GR2 GR10				non-mobilizable	genus
Enterobacter	Enterobacter cloacae complex sp.	AR_0093	NZ_CP027605.1	118226	51.34	TEM-1	IncFI(RepB)				non-mobilizable	order					Z4832	Z4833
Enterobacter	Enterobacter cloacae complex sp.	AR_0093	NZ_CP027606.1	87025	54.07	APH(3')-Ia mphA AAC(3)-Ib qacL qacEdelta1 sul1 AAC(6')-Ib-cr6 OXA-1 catB3 arr-3 qacEdelta1 sul1 KPC-6 TEM-1 APH(3')-Ia	IncT IncFI(RepE)			MOBF	mobilizable	order
Klebsiella	Klebsiella pneumoniae	AR_0153	NZ_CP028929.1	283371	46.41	dfrA14 OXA-1 AAC(6')-Ib-cr6 QnrB1 BRP(MBL) NDM-1 APH(3')-VI mphE msrE armA sul1 qacEdelta1 aadA2 dfrA12	GR5	MOBH	MPF_F		conjugative	class	REBASE:M.EcoRII				hok(hok) b1563	STM3652 VCA0445		htpB PA3142
Klebsiella	Klebsiella pneumoniae	AR_0153	NZ_CP028930.1	103694	51		IncFI(RepB)	MOBF,MOBF	MPF_F		conjugative	order		sopB sopB	psiB_ECOLX	traN_F	hok(hok)
Klebsiella	Klebsiella pneumoniae	AR_0153	NZ_CP028931.1	70829	52.92	EreA2 arr-2 SHV-11 AAC(3)-IId CTX-M-15 AAC(6')-Ib10 ANT(3'')-IIa OXA-9 TEM-1 sul2 APH(3'')-Ib APH(6)-Id sul1 qacEdelta1 cmlA5	IncFI(RepE) IncR			MOBF	mobilizable	order		ParB			XOC_RS18085 XOC_RS18085
Klebsiella	Klebsiella pneumoniae	AR_0141	NZ_CP028954.1	214704	51.61	ANT(3'')-IIa qacEdelta1 sul1	pCD1 IncFI(RepB)	MOBF,MOBF	MPF_F		conjugative	order		sopB sopB	psiB_ECOLX	traN_F	hok(hok) STM3651	STM3652		PA3142 ibeB
Klebsiella	Klebsiella pneumoniae	AR_0141	NZ_CP028955.1	134346	52.89	tet(A) dfrA14 AAC(6')-Ib-cr6 tet(D) sul2	IncR pCD1 IncT	MOBF		MOBF	mobilizable	order	REBASE:M.EcoRII	ParB	psiB_ECOLX		XOC_RS18085			PA3142
Morganella	Morganella morganii	AR_0133	NZ_CP028957.1	5884	48.52			MOBQ			mobilizable	genus
Morganella	Morganella morganii	AR_0133	NZ_CP028958.1	71304	53.55	dfrA14 tet(D) KPC-2 KPC-2	IncN	MOBF	MPF_T	MOBF	conjugative	class
Klebsiella	Klebsiella pneumoniae	AR_0142	NZ_CP028991.1	85698	51.5	sul2 AAC(6')-Ib-cr6 tet(D) dfrA14	IncT			MOBF	mobilizable	order			psiB_ECOLX					PA3142
Klebsiella	Klebsiella pneumoniae	AR_0142	NZ_CP028992.1	68953	52.47						non-mobilizable	family
Klebsiella	Klebsiella pneumoniae	AR_0142	NZ_CP028993.1	49476	55.3	tet(A)	pCD1 IncR	MOBF			mobilizable	order		ParB			XOC_RS18085
Klebsiella	Klebsiella pneumoniae	AR_0079	NZ_CP029000.1	125913	52.3	TEM-1 QnrB4 DHA-1	pCD1	MOBF,MOBF	MPF_F		conjugative	order			psiB_ECOLX	traN_F
Klebsiella	Klebsiella pneumoniae	AR_0079	NZ_CP028999.1	46504	49.73	CTX-M-14		MOBF	MPF_T		conjugative	class					b2782
Klebsiella	Klebsiella pneumoniae	AR_0079	NZ_CP028998.1	10077	55.04			MOBC			mobilizable	order
Klebsiella	Klebsiella pneumoniae	AR_0079	NZ_CP028997.1	109938	49.26		IncFI(RepB)				non-mobilizable	order
Klebsiella	Klebsiella pneumoniae	AR_0079	NZ_CP028996.1	176325	51.91	Erm(42) TEM-1 rmtB tet(D) cmlA9 qacEdelta1 aadA2 dfrA12 AAC(3)-IId TEM-1 APH(6)-Id APH(3'')-Ib sul2 CTX-M-14	IncA/C (=IncP-3)	MOBH,MOBH	MPF_F	MOBH	conjugative	phylum
Klebsiella	Klebsiella pneumoniae	AR_0079	NZ_CP028995.1	152176	51.46	DHA-1 QnrB4 TEM-1	IncFI(RepB) pCD1	MOBF,MOBF	MPF_F		conjugative	order		sopB sopB	psiB_ECOLX	traN_F	STM3651 hok(hok)	STM3652		ibeB
Staphylococcus	Staphylococcus aureus	AR_0466	NZ_CP029079.1	24653	28.65	PC1_beta-lactamase_(blaZ)	Rep-family_5 Rep-family_16	MOBV		MOBQ	mobilizable	class
Staphylococcus	Staphylococcus aureus	AR_0465	NZ_CP029081.1	27246	27.2	PC1_beta-lactamase_(blaZ)	Rep-family_22 Rep-family_20			MOBV,MOBV	mobilizable	class								sea sea
Klebsiella	Klebsiella pneumoniae	AR_0438	NZ_CP029098.1	11611	45.16				MPF_T		non-mobilizable	order
Klebsiella	Klebsiella pneumoniae	AR_0438	NZ_CP029100.1	29625	47.71	SHV-11		MOBP			mobilizable	order
Klebsiella	Klebsiella pneumoniae	AR_0438	NZ_CP029101.1	208035	52.92	APH(3')-Ia mphA sul1 qacEdelta1 aadA2 dfrA12 catI	IncFI(RepB) pCD1	MOBF,MOBF	MPF_F		conjugative	order		sopB sopB	psiB_ECOLX	traN_F	hok(hok) STM3651 XOC_RS18085 XOC_RS18085	STM3652		ibeB
Klebsiella	Klebsiella pneumoniae	AR_0438	NZ_CP029102.1	135655	54.15	TEM-1 KPC-3 KPC-3 TEM-1	pCD1	MOBF,MOBF	MPF_F		conjugative	order			psiB_ECOLX	traN_F
Pseudomonas	Pseudomonas paraeruginosa	AR_0441	NZ_CP029091.1	165365	55.79		IncP-7	MOBH	MPF_F		conjugative	multi-phylla
Pseudomonas	Pseudomonas paraeruginosa	AR_0441	NZ_CP029092.1	57052	60.86	KPC-2		MOBF	MPF_T		conjugative	genus
Pseudomonas	Pseudomonas paraeruginosa	AR_0441	NZ_CP029094.1	438529	57.14	tet(D) sul1 qacEdelta1 aadA16 AAC(6')-Ib9	IncP-2		MPF_I		non-mobilizable	multi-phylla					XOC_RS18085			csrA pilG xcpA/pilD
Staphylococcus	Staphylococcus aureus	AR_0464	NZ_CP029083.1	20730	28.37	PC1_beta-lactamase_(blaZ)	Rep-family_16	MOBV		MOBQ	mobilizable	genus
Staphylococcus	Staphylococcus aureus	AR_0462	NZ_CP029085.1	27267	27.18	PC1_beta-lactamase_(blaZ)	Rep-family_22 Rep-family_20			MOBV	mobilizable	class								sea
Escherichia	Escherichia coli	AR_0437	NZ_CP029103.1	89643	47.5		IncT				non-mobilizable	family		ParB
Escherichia	Escherichia coli	AR_0437	NZ_CP029104.1	76919	53.19	dfrA8 tet(A)	IncZ	MOBF	MPF_F	MOBF	conjugative	order		ParM	psiB_ECOLX	traN_F	hok(hok)		NG_034386.1
Escherichia	Escherichia coli	AR_0437	NZ_CP029105.1	2101	47.17						non-mobilizable	family
Escherichia	Escherichia coli	AR_0437	NZ_CP029106.1	1546	51.42					MOB_unknown	mobilizable	order
Escherichia	Escherichia coli	AR_0437	NZ_CP029107.1	93435	52.14	tet(A) AAC(6')-Ib-cr6 OXA-1 CTX-M-15 mphA	IncZ IncZ IncFI(RepB) IncFI(RepE)				non-mobilizable	order		sopB sopB			D616_p97086(srnB) D616_p97105	D616_p97106	NC_002483.1	iucA iucB iucC iucD iutA
Escherichia	Escherichia coli	AR_0435	NZ_CP029113.1	114412	52.94	tet(A) aadA5 qacEdelta1 sul1 mphA	IncZ IncFI(RepE)	MOBF	MPF_F		conjugative	order		sopB sopB		traN_F	STM3033 D616_p97086(srnB) D616_p97105	STM3034 D616_p97106	NC_002483.1
Escherichia	Escherichia coli	AR_0435	NZ_CP029114.1	3656	46.12						non-mobilizable	multi-phylla
Escherichia	Escherichia coli	AR_0435	NZ_CP029116.1	25348	48.2	CMY-42		MOBP	MPF_I		conjugative	family							NC_023329.1	pilV pilS pilQ
Escherichia	Escherichia coli	AR_0435	NZ_CP029117.1	120846	47.48		IncT				non-mobilizable	family		ParB
Escherichia	Escherichia coli	AR_0435	NZ_CP029118.1	187909	52.28	TEM-1 OXA-9 ANT(3'')-IIa AAC(6')-Ib10 SHV-12 BRP(MBL) NDM-1 mphE msrE armA sul1 qacEdelta1 aadA2 dfrA12	IncA/C (=IncP-3) GR5	MOBH,MOBH	MPF_F	MOBH	conjugative	phylum	REBASE:M.XmnI							htpB
Escherichia	Escherichia coli	AR_0435	NZ_CP029119.1	35284	48.97		IncK				non-mobilizable	order			psiA psiB_ECOLX		D616_p112058(pndA)		NC_023329.1
Escherichia	Escherichia coli	AR_0435	NZ_CP029120.1	6172	52.53	sul2 APH(3'')-Ib APH(6)-Id				MOBP	mobilizable	multi-phylla
Escherichia	Escherichia coli	AR_0435	NZ_CP029121.1	3174	46.79			MOBF		MOB_unknown	mobilizable	multi-phylla
Escherichia	Escherichia coli	AR_0436	NZ_CP029109.1	1565	50.86					MOBP	mobilizable	order
Escherichia	Escherichia coli	AR_0436	NZ_CP029110.1	91246	49.6	CMY-2	IncK	MOBP	MPF_I		conjugative	order			psiB_ECOLX psiA	pilV_KLPN	D616_p112058(pndA) D616_p97105	D616_p97106	NC_023329.1	pilV pilS pilQ
Escherichia	Escherichia coli	AR_0436	NZ_CP029112.1	59626	52.12			MOBF	MPF_T	MOBF	conjugative	class								CBU_0270
Pseudomonas	Pseudomonas aeruginosa	AR_0439	NZ_CP029095.1	1129	54.38						non-mobilizable	order
Pseudomonas	Pseudomonas aeruginosa	AR_0439	NZ_CP029096.1	437392	56.88	sul1 qacEdelta1 ANT(3'')-IIa IMP-18 qacL AAC(6')-Il			MPF_I		non-mobilizable	genus	REBASE:M.PfrJS9III				XOC_RS18085 XOC_RS18085			pilG csrA galE xcpA/pilD
Proteus	Proteus mirabilis	AR_0379	NZ_CP029129.1	12439	33.58						non-mobilizable	family					D616_p97086(srnB)
Proteus	Proteus mirabilis	AR_0379	NZ_CP029130.1	1131	49.25						non-mobilizable
Proteus	Proteus mirabilis	AR_0379	NZ_CP029131.1	1059	52.03						non-mobilizable
Proteus	Proteus mirabilis	AR_0379	NZ_CP029132.1	911	52.58						non-mobilizable
Proteus	Proteus mirabilis	AR_0379	NZ_CP029134.1	3125	52.64				MPF_T		non-mobilizable
Escherichia	Escherichia coli	AR_0434	NZ_CP029123.1	97471	51.93	AAC(3)-IId sul1 qacEdelta1 VEB-5 tet(C) sul1 qacEdelta1 AAC(6')-Ib10	IncA/C (=IncP-3)			MOBH	mobilizable	phylum
Klebsiella	Klebsiella oxytoca	AR_0380	NZ_CP029127.1	78352	49.22		IncFI(RepE) pCD1				non-mobilizable	order								PA3142
Enterobacter	Enterobacter hormaechei	AR_0432	NZ_CP029124.1	2692	46.88			MOBV			mobilizable	order
Enterobacter	Enterobacter hormaechei	AR_0432	NZ_CP029125.1	4096	55.52			MOBP		MOBP	mobilizable	multi-phylla
Klebsiella	Klebsiella pneumoniae	AR_0376	NZ_CP029135.1	70613	51.62	dfrA14 TEM-1 APH(6)-Id APH(3'')-Ib sul2	IncT IncFI(RepE) IncR			MOBF	mobilizable	order		ParB						PA3142
Klebsiella	Klebsiella pneumoniae	AR_0376	NZ_CP029136.1	190416	52.46		pCD1 IncFI(RepB)	MOBF,MOBF	MPF_F		conjugative	order		sopB sopB	psiB_ECOLX	traN_F	XOC_RS18085 STM3651 hok(hok) XOC_RS18085	STM3652		ibeB
Klebsiella	Klebsiella pneumoniae	AR_0376	NZ_CP029138.1	81137	53.64	mphA ANT(2'')-Ia SHV-7	IncL/M	MOBP	MPF_I		conjugative	phylum
Klebsiella	Klebsiella pneumoniae	AR_0376	NZ_CP029139.1	2058	56.51						non-mobilizable	order
Staphylococcus	Staphylococcus aureus	AR_0472	NZ_CP029648.1	2473	30.81	ErmC	Rep-family_10b				non-mobilizable	class
Staphylococcus	Staphylococcus aureus	AR_0223	NZ_CP029668.1	3125	28.74		Rep-family_22			MOB_unknown	mobilizable	class
Staphylococcus	Staphylococcus aureus	AR_0219	NZ_CP029674.1	25109	28.93	AAC(6')-Ie-APH(2'')-Ia qacA	Rep-family_20	MOBQ			mobilizable	genus
Staphylococcus	Staphylococcus aureus	AR_0216	NZ_CP029676.1	3127	28.72		Rep-family_22			MOB_unknown	mobilizable	class
Staphylococcus	Staphylococcus aureus	AR_0216	NZ_CP029677.1	27067	30.54	msrA mphC APH(3')-IIIa SAT-4	Rep-family_16 Rep-family_5			MOBQ	mobilizable	class								cylR2
Staphylococcus	Staphylococcus aureus	AR_0471	NZ_CP029650.1	40931	30.71	PC1_beta-lactamase_(blaZ)	Rep-family_22			MOB_unknown	mobilizable	class								sell
Staphylococcus	Staphylococcus aureus	AR_0471	NZ_CP029651.1	8012	30.44			MOBP		MOBP	mobilizable	genus
Staphylococcus	Staphylococcus aureus	AR_0467	NZ_CP029659.1	27244	27.21	PC1_beta-lactamase_(blaZ)	Rep-family_22 Rep-family_20			MOBV,MOBV	mobilizable	class								sea sea
Staphylococcus	Staphylococcus aureus	AR_0225	NZ_CP029666.1	27063	30.54	PC1_beta-lactamase_(blaZ) APH(3')-IIIa SAT-4 msrA mphC	Rep-family_5 Rep-family_16			MOBQ	mobilizable	class								cylR2
Staphylococcus	Staphylococcus aureus	AR_0469	NZ_CP029654.1	27267	27.18	PC1_beta-lactamase_(blaZ)	Rep-family_22 Rep-family_20			MOBV,MOBV	mobilizable	class								sea sea
Staphylococcus	Staphylococcus aureus	AR_0215	NZ_CP029679.1	27267	27.17	PC1_beta-lactamase_(blaZ)	Rep-family_20 Rep-family_22			MOBV,MOBV	mobilizable	class								sea
Staphylococcus	Staphylococcus aureus	AR_0226	NZ_CP029665.1	26984	30.53	msrA mphC PC1_beta-lactamase_(blaZ) APH(3')-IIIa	Rep-family_16 Rep-family_5			MOBQ	mobilizable	class								cylR2
Staphylococcus	Staphylococcus aureus	AR_0468	NZ_CP029656.1	27245	27.2	PC1_beta-lactamase_(blaZ)	Rep-family_20 Rep-family_22			MOBV,MOBV	mobilizable	class								sea sea
Staphylococcus	Staphylococcus aureus	AR_0228	NZ_CP029661.1	28166	29.94	qacJ ANT(4')-Ib S.aureus_mupA	Rep-family_24 Rep-family_22 Rep-family_22	MOBV			mobilizable	multi-phylla
Staphylococcus	Staphylococcus aureus	AR_0228	NZ_CP029662.1	27238	27.18	PC1_beta-lactamase_(blaZ)	Rep-family_22 Rep-family_20			MOBV,MOBV	mobilizable	class								sea sea
Staphylococcus	Staphylococcus aureus	AR_0222	NZ_CP029670.1	27276	27.17	PC1_beta-lactamase_(blaZ)	Rep-family_20 Rep-family_22			MOBV,MOBV	mobilizable	class								sea sea
Staphylococcus	Staphylococcus aureus	AR_0220	NZ_CP029672.1	27269	27.17	PC1_beta-lactamase_(blaZ)	Rep-family_20 Rep-family_22			MOBV,MOBV	mobilizable	class								sea sea
Enterobacter	Enterobacter cloacae complex sp.	AR_0154	NZ_CP029719.1	138933	52.75		IncFI(RepB) IncK IncFII(RepA1)	MOBF	MPF_F		conjugative	order		sopB			STM3651 hok(hok) b1563	STM3652 b1564		ibeB
Enterobacter	Enterobacter cloacae complex sp.	AR_0154	NZ_CP029720.1	65672	52.3	SHV-30 ANT(2'')-Ia	IncL/M	MOBP	MPF_I		conjugative	phylum
Enterobacter	Enterobacter cloacae complex sp.	AR_0154	NZ_CP029721.1	18990	53.25		IncN				non-mobilizable	order	REBASE:M.EcoRII
Enterobacter	Enterobacter cloacae complex sp.	AR_0154	NZ_CP029717.1	315949	47.99	AAC(6')-IIc AAC(3)-IIg EreA2 qacEdelta1 sul1 sul2 SHV-12 catII_K12 TEM-1 catII_K12 tet(D) AAC(6')-Ib10 ANT(3'')-IIa qacEdelta1 sul1 QnrB20 sul1 dfrA19 APH(3'')-Ib APH(6)-Id ANT(3'')-IIa qacEdelta1 sul1 QnrB20 sul1 dfrA19 APH(3'')-Ib APH(6)-Id MCR-9.1	IncS (=IncHI2) IncH	MOBH	MPF_F	MOBH	conjugative	order					hok(hok) b1563 XOC_RS18085	b1564
Enterobacter	Enterobacter cloacae complex sp.	AR_0154	NZ_CP029718.1	158987	52.56	dfrA12 aadA2 qacEdelta1 sul1 QnrA1 sul1 mphA ANT(3'')-IIa dfrA1 AAC(6')-Il VIM-1	IncA/C (=IncP-3)	MOBH,MOBH	MPF_F	MOBH	conjugative	phylum	REBASE:M.XmnI
Proteus	Proteus mirabilis	AR_0029	NZ_CP029726.1	10024	42.31		Rep(pSC101)	MOBQ			mobilizable	order
Providencia	Providencia rettgeri	AR_0082	NZ_CP029737.1	144970	52.05	NDM-1 BRP(MBL) sul1 qacEdelta1 aadA2 dfrA12	IncA/C (=IncP-3)	MOBH,MOBH	MPF_F	MOBH	conjugative	phylum								htpB
Escherichia	Escherichia coli	AR_0085	NZ_CP029742.1	139740	51.5		IncZ	MOBP,MOBP,MOBP	MPF_I	MOBP	conjugative	order			psiA psiB_ECOLX		D616_p112058(pndA) D616_p112058(pndA) b1563 D616_p97105	VCA0445 D616_p97106
Escherichia	Escherichia coli	AR_0085	NZ_CP029743.1	104555	51.47	CMY-2 floR tet(A) APH(6)-Id APH(3'')-Ib sul2	IncA/C (=IncP-3)	MOBH,MOBH	MPF_F	MOBH	conjugative	phylum
Escherichia	Escherichia coli	AR_0085	NZ_CP029744.1	117192	49.35	tetR tet(B)	IncFI(RepB) IncZ	MOBF,MOBP	MPF_F	MOBF	conjugative	order		sopB sopB	psiB_ECOLX	traN_F	XOC_RS18085 XOC_RS18085 STM3033	STM3034	NG_034386.1	mig-14 icsP/sopA iroB iroC iroD iroE iroN
Klebsiella	Klebsiella pneumoniae	AR_0087	NZ_CP029739.1	175746	50.27		IncFI(RepB)				non-mobilizable	phylum		sopB sopB			XOC_RS18085 STM4031			ibeB
Klebsiella	Klebsiella pneumoniae	AR_0087	NZ_CP029740.1	103250	53.91	QnrB1 SHV-12 tet(A)	IncT pCD1	MOBF,MOBF	MPF_F		conjugative	order			psiB_ECOLX	traN_F	D616_p97105	D616_p97106
Citrobacter	Citrobacter sp. CRE-46	AR_0157	NZ_CP029729.1	250887	46.78	CTX-M-15 mphE msrE armA sul1 qacEdelta1 aadA2 dfrA12 AAC(6')-Ib9 ANT(3'')-IIa OXA-9 TEM-1	IncH GR5	MOBH	MPF_F		conjugative	class	REBASE:M.PfrJS9III				XOC_RS18085			PA3142
Citrobacter	Citrobacter sp. CRE-46	AR_0157	NZ_CP029730.1	136246	55.72		IncP-2 IncA/C (=IncP-3)	MOBH,MOBP	MPF_T	MOBH	conjugative	multi-phylla	REBASE:M3.BstXII							mtrD
Citrobacter	Citrobacter sp. CRE-46	AR_0157	NZ_CP029731.1	108148	54.29	sul1 rmtC NDM-1 BRP(MBL)	pCD1 IncFI(RepB)	MOBF	MPF_F		conjugative	order			psiB_ECOLX	traN_F	XOC_RS18085 XOC_RS18085 XOC_RS18085 Z4832 XOC_RS18085 D616_p97105	Z4833 D616_p97106		LPG_RS06795 PA3142 htpB
Citrobacter	Citrobacter sp. CRE-46	AR_0157	NZ_CP029732.1	68384	53.6		pCD1	MOBF	MPF_F		conjugative	order			psiB_ECOLX		XOC_RS18085
Citrobacter	Citrobacter sp. CRE-46	AR_0157	NZ_CP029733.1	83094	51.51		pCD1	MOBP		MOB_unknown	mobilizable	family					hok(hok)			pilQ pilS
Citrobacter	Citrobacter sp. CRE-46	AR_0157	NZ_CP029734.1	76953	52.39	TEM-1 mphA ErmB	pCD1	MOBF	MPF_F	MOBP	conjugative	order		ParM	psiB_ECOLX	traN_F			NG_034386.1
Citrobacter	Citrobacter sp. CRE-46	AR_0157	NZ_CP029735.1	63868	44.35	catI		MOBP	MPF_T		conjugative	order					XOC_RS18085 XOC_RS18085			cps4J cap8G gndA rfbC rfbA rffG
Citrobacter	Citrobacter sp. CRE-46	AR_0157	NZ_CP029728.1	31764	41.34			MOBP	MPF_T		conjugative	family
Klebsiella	Klebsiella pneumoniae	AR_0140	NZ_CP029723.1	183663	52.89	AAC(6')-Ib-cr6 tet(D) sul2 ANT(3'')-IIa qacEdelta1 sul1 tet(A) dfrA14	IncR pCD1 IncT	MOBF		MOBF	mobilizable	order		ParB	psiB_ECOLX					PA3142
Klebsiella	Klebsiella pneumoniae	AR_0140	NZ_CP029724.1	178561	51.38	catI EreA2 arr-2	IncFI(RepB) pCD1	MOBF,MOBF	MPF_F		conjugative	order		sopB sopB	psiB_ECOLX	traN_F	STM3651 XOC_RS18085 hok(hok)	STM3652		PA3142 ibeB
Klebsiella	Klebsiella pneumoniae	AR_0362	NZ_CP030343.1	207546	52.9	catI dfrA12 aadA2 qacEdelta1 sul1 mphA APH(3')-Ia	IncFI(RepB) pCD1	MOBF,MOBF	MPF_F		conjugative	order		sopB sopB	psiB_ECOLX	traN_F	XOC_RS18085 STM3651 hok(hok)	STM3652		ibeB
Klebsiella	Klebsiella pneumoniae	AR_0362	NZ_CP030342.1	113639	53.93	TEM-1 KPC-2	pCD1	MOBF,MOBF	MPF_F		conjugative	order			psiB_ECOLX	traN_F
Klebsiella	Klebsiella pneumoniae	AR_0362	NZ_CP030344.1	8667	43.03			MOBP			mobilizable	order
Staphylococcus	Staphylococcus aureus	AR_0475	NZ_CP030324.1	27168	30.56	mphC msrA SAT-4 APH(3')-IIIa PC1_beta-lactamase_(blaZ)	Rep-family_5 Rep-family_16			MOBQ	mobilizable	class								cylR2
Escherichia	Escherichia coli	AR_0452	NZ_CP030329.1	128762	50.83	QepA4 dfrA12 aadA2 qacEdelta1 sul1 BRP(MBL) NDM-5 mphA TEM-1 tet(B) tetR	IncFI(RepB) IncZ	MOBF	MPF_F	MOBF	conjugative	order				traN_F	Z4832 XOC_RS18085 STM3033 D616_p97086(srnB)	Z4833 STM3034	NC_002483.1	PA3142
Escherichia	Escherichia coli	AR_0452	NZ_CP030332.1	4593	50.45			MOBP		MOBP	mobilizable	multi-phylla
Escherichia	Escherichia coli	AR_0452	NZ_CP030330.1	6395	42.61					MOBF,MOB_unknown	mobilizable	multi-phylla					pECA1039_03b(toxN)		NC_011767.1
Escherichia	Escherichia coli	AR_0451	NZ_CP030335.1	75281	52.66	dfrA14 QnrS1 KPC-3 AAC(6')-Ib9 ANT(3'')-IIa OXA-9 TEM-1	IncN	MOBF	MPF_T	MOBF	conjugative	class
Escherichia	Escherichia coli	AR_0451	NZ_CP030340.1	34927	48.59				MPF_I		non-mobilizable	family					D616_p112058(pndA)		NC_023329.1
Escherichia	Escherichia coli	AR_0451	NZ_CP030339.1	35509	50.91		IncFI(RepE)		MPF_F	MOBF	mobilizable	order	REBASE:M.EcoGIX	sopB sopB	psiB_ECOLX		D616_p97105	D616_p97106	NG_034386.1	AAA92657
Escherichia	Escherichia coli	AR_0451	NZ_CP030336.1	16907	48.95						non-mobilizable
Escherichia	Escherichia coli	AR_0451	NZ_CP030338.1	1549	51					MOB_unknown	mobilizable	order
Escherichia	Escherichia coli	AR_0451	NZ_CP030333.1	4082	49.49			MOBQ		MOBQ,MOBQ	mobilizable	family
Escherichia	Escherichia coli	AR_0451	NZ_CP030334.1	7588	45.03		ColE3	MOBQ			mobilizable	family
Enterobacter	Enterobacter hormaechei	AR_0038	NZ_CP030345.1	152715	50.13	mphE msrE armA sul1 qacEdelta1 NDM-1 BRP(MBL) sul1 qacEdelta1 aadA2 dfrA12 AAC(3)-IId TEM-1 CTX-M-15 OXA-1 AAC(6')-Ib-cr6 AAC(6')-Ib10 ANT(3'')-IIa OXA-9 mphE sul1 qacEdelta1 aadA2	GR5 IncR pCD1 GR5				non-mobilizable	class	REBASE:M.EcoRII	ParB	psiB_ECOLX		b1563 D616_p97105 b1563	D616_p97106
Enterobacter	Enterobacter hormaechei	AR_0038	NZ_CP030346.1	4858	52.37			MOBP		MOBP	mobilizable	multi-phylla
Enterobacter	Enterobacter hormaechei	AR_0038	NZ_CP030348.1	2089	50.45					MOBP	mobilizable	family
Enterobacter	Enterobacter hormaechei	AR_0038	NZ_CP030349.1	1917	52.27					MOBP	mobilizable	multi-phylla
Enterobacter	Enterobacter hormaechei	AR_0038	NZ_CP030350.1	106698	51.89	QnrS1 LAP-2	pCD1	MOBP		MOB_unknown	mobilizable	family	REBASE:M.EcoGIX				hok(hok)		NG_034386.1	pilQ
Staphylococcus	Staphylococcus aureus	AR_0474	NZ_CP030325.1	30429	29.64	AAC(6')-Ie-APH(2'')-Ia PC1_beta-lactamase_(blaZ)	Rep-family_16 Rep-family_5			MOBQ	mobilizable	class								gndA
Acinetobacter	Acinetobacter baumannii	AR_0070	NZ_CP027179.1	39535	39.95	OXA-58 OXA-58 OXA-58	GR7	MOBP			mobilizable	genus					VCA0478	VCA0445
Acinetobacter	Acinetobacter baumannii	AR_0070	NZ_CP027180.1	73018	35.45		GR19 GR19 GR8 GR8 GR8 GR8 GR8	MOBQ,MOBQ			mobilizable	class
Acinetobacter	Acinetobacter baumannii	AR_0070	NZ_CP027181.1	6078	39.26	ANT(2'')-Ia		MOBP			mobilizable	class
Acinetobacter	Acinetobacter baumannii	AR_0070	NZ_CP027182.1	105127	39.36			MOBP,MOBP			mobilizable	genus
Acinetobacter	Acinetobacter baumannii	AR_0052	NZ_CP027185.1	105128	39.36			MOBP,MOBP			mobilizable	genus
Acinetobacter	Acinetobacter baumannii	AR_0052	NZ_CP027184.1	60699	38.83	OXA-58 OXA-58 OXA-58	GR7 GR19	MOBP			mobilizable	genus					VCA0478	VCA0445
Acinetobacter	Acinetobacter baumannii	AR_0052	NZ_CP027187.1	6078	39.26	ANT(2'')-Ia		MOBP			mobilizable	class
Acinetobacter	Acinetobacter baumannii	AR_0052	NZ_CP027186.1	38505	35.26		GR8 GR8 GR8	MOBQ,MOBQ			mobilizable	class
Klebsiella	Klebsiella pneumoniae	AR_0076	NZ_CP032168.1	158987	52.56	VIM-1 AAC(6')-Il dfrA1 ANT(3'')-IIa mphA sul1 QnrA1 sul1 qacEdelta1 aadA2 dfrA12	IncA/C (=IncP-3)	MOBH,MOBH	MPF_F	MOBH	conjugative	phylum	REBASE:M.NgoMV REBASE:M1.SmoLVII
Klebsiella	Klebsiella pneumoniae	AR_0076	NZ_CP032169.1	171589	52.12		IncFI(RepB) IncFI(RepE)			MOBF	mobilizable	order	REBASE:M.EcoGIX	sopB sopB	psiB_ECOLX		D616_p97105 XOC_RS18085 b1563 hok(hok) STM3651	D616_p97106 b1564 STM3652		PA3142 ibeB
Klebsiella	Klebsiella pneumoniae	AR_0076	NZ_CP032170.1	65672	52.3	SHV-30 ANT(2'')-Ia	IncL/M	MOBP	MPF_I		conjugative	phylum
Klebsiella	Klebsiella pneumoniae	AR_0076	NZ_CP032171.1	25510	51.89		IncR				non-mobilizable	order		ParB
Klebsiella	Klebsiella pneumoniae	AR_0076	NZ_CP032172.1	25871	40.24			MOBC			mobilizable	order
Klebsiella	Klebsiella pneumoniae	AR_0135	NZ_CP032176.1	90682	53.47	dfrA14 tet(D) sul1 qacJ catB2 ANT(3'')-IIa VIM-1 SHV-12 AAC(6')-Ib10 ANT(3'')-IIa OXA-9 TEM-1 AAC(3)-IIe	IncFI(RepE) IncT IncR			MOBF	mobilizable	order		ParB						PA3142
Klebsiella	Klebsiella pneumoniae	AR_0135	NZ_CP032177.1	9294	55.19			MOBC			mobilizable	order
Klebsiella	Klebsiella pneumoniae	AR_0160	NZ_CP032173.1	153522	51.79		IncFI(RepB)				non-mobilizable	order		sopB sopB			b1563 STM3651	VCA0445 STM3652		ibeB
Klebsiella	Klebsiella pneumoniae	AR_0160	NZ_CP032174.1	63589	51.22	OXA-48	IncL/M	MOBP	MPF_I		conjugative	phylum
Klebsiella	Klebsiella pneumoniae	AR_0075	NZ_CP032186.1	202373	52.75	AAC(6')-Ib-cr6 OXA-1 tet(A)	pCD1 IncFI(RepB)	MOBF,MOBF	MPF_F		conjugative	order	REBASE:M.BstXI	sopB sopB	psiB_ECOLX	traN_F	XOC_RS18085 STM3651 STM3651 hok(hok)	STM3652 STM3652		ibeB
Klebsiella	Klebsiella pneumoniae	AR_0075	NZ_CP032187.1	110928	48.94		IncFI(RepB)				non-mobilizable	order
Klebsiella	Klebsiella pneumoniae	AR_0075	NZ_CP032188.1	93870	53.55	arr-2 AAC(6')-Ib rmtF CTX-M-15 CTX-M-15	IncT	MOBP	MPF_I		conjugative	order					D616_p97105	D616_p97106
Klebsiella	Klebsiella pneumoniae	AR_0075	NZ_CP032189.1	127285	52.89	arr-3 dfrA1 qacEdelta1 sul1	IncK IncR	MOBF,MOBF	MPF_F		conjugative	order		ParB	psiB_ECOLX	traN_F	XOC_RS18085
Klebsiella	Klebsiella pneumoniae	AR_0075	NZ_CP032190.1	36889	45.13			MOBP	MPF_T		conjugative	order
Klebsiella	Klebsiella pneumoniae	AR_0075	NZ_CP032191.1	78188	52.11						non-mobilizable	family
Salmonella	Salmonella enterica subsp. enterica serovar Senftenberg	AR_0127	NZ_CP032192.1	159356	51.54	AAC(6')-Ib10 qacEdelta1 sul1 APH(6)-Id APH(3'')-Ib AAC(3)-IIe TEM-1 CMY-4	IncA/C (=IncP-3)	MOBH,MOBH	MPF_F	MOBH	conjugative	phylum
Salmonella	Salmonella enterica subsp. enterica serovar Senftenberg	AR_0127	NZ_CP032193.1	87450	51.52	sul1 armA msrE mphE AAC(3)-IId TEM-1 NDM-1 BRP(MBL)	GR5 IncL/M	MOBP	MPF_I		conjugative	phylum
Klebsiella	Klebsiella pneumoniae	AR_0097	NZ_CP032195.1	143515	51.25	dfrA12 aadA2 qacEdelta1 sul1	IncFI(RepB) pCD1	MOBF,MOBF	MPF_F		conjugative	order		sopB sopB	psiB_ECOLX	traN_F				ibeB
Klebsiella	Klebsiella pneumoniae	AR_0097	NZ_CP032196.1	109398	49.35		IncFI(RepB)				non-mobilizable	genus
Klebsiella	Klebsiella pneumoniae	AR_0097	NZ_CP032197.1	73502	53.89	KPC-3 AAC(6')-Ib10 ANT(3'')-IIa OXA-9 TEM-1 APH(6)-Id APH(3'')-Ib sul2 dfrA14	IncFI(RepE)				non-mobilizable	order		ParB	psiB_ECOLX
Klebsiella	Klebsiella pneumoniae	AR_0097	NZ_CP032198.1	58029	54.44		IncFII(RepA1)	MOBF,MOBF	MPF_F		conjugative	order				traN_F
Klebsiella	Klebsiella pneumoniae	AR_0097	NZ_CP032199.1	9294	55.16			MOBC			mobilizable	order
Escherichia	Escherichia coli	AR_0086	NZ_CP032202.1	140509	52.04	TEM-1 AAC(3)-IId tet(A) APH(6)-Id APH(3'')-Ib sul2 mphA sul1 qacEdelta1 aadA5 dfrA17	pCD1 IncFI(RepB) IncFI(RepE)	MOBF,MOBP	MPF_F	MOBF	conjugative	order	REBASE:M.EcoGIX	sopB sopB	psiB_ECOLX		D616_p97086(srnB) XOC_RS18085 D616_p97105	D616_p97106	NG_034386.1	senB AAA92657
Escherichia	Escherichia coli	AR_0086	NZ_CP032203.1	41865	51.14		IncN	MOBF	MPF_T	MOBF	conjugative	class
Escherichia	Escherichia coli	AR_0013	NZ_CP032205.1	70275	52.27	CTX-M-14	pCD1	MOBF,MOBF	MPF_F	MOBF	conjugative	order		ParM	psiB_ECOLX	traN_F			NG_034386.1
Klebsiella	Klebsiella pneumoniae	AR_0109	NZ_CP032206.1	42202	34.88						non-mobilizable	order
Klebsiella	Klebsiella pneumoniae	AR_0109	NZ_CP032208.1	310872	47.3			MOBH	MPF_F		conjugative	order					b1563 hok(hok)	b1564		CBU_0270
Klebsiella	Klebsiella pneumoniae	AR_0109	NZ_CP032209.1	161618	52.08		IncFI(RepB) pCD1	MOBF,MOBF	MPF_F		conjugative	order		sopB sopB	psiB_ECOLX	traN_F	hok(hok) STM3651 XOC_RS18085	STM3652		ibeB
Klebsiella	Klebsiella pneumoniae	AR_0109	NZ_CP032210.1	40448	42.57						non-mobilizable	order
Klebsiella	Klebsiella pneumoniae	AR_0109	NZ_CP032211.1	5861	47.07						non-mobilizable	multi-phylla					VCA0391
Klebsiella	Klebsiella pneumoniae	AR_0109	NZ_CP032212.1	83015	51.64	dfrA14 sul2 APH(3'')-Ib APH(6)-Id catII_K12 CTX-M-15 TEM-1 AAC(3)-IId TEM-1 tet(D) AAC(3)-IIe OXA-1 AAC(6')-Ib-cr6 QnrB1	IncT IncFI(RepE) IncR			MOBF	mobilizable	order								PA3142
Klebsiella	Klebsiella pneumoniae	AR_0046	NZ_CP032223.1	201149	44.83			MOBH	MPF_F		conjugative	order					hok(hok)
Klebsiella	Klebsiella pneumoniae	AR_0046	NZ_CP032224.1	73056	51.06						non-mobilizable	family
Klebsiella	Klebsiella pneumoniae	AR_0046	NZ_CP032225.1	108879	49.31		IncFI(RepB)				non-mobilizable	order
Klebsiella	Klebsiella pneumoniae	AR_0046	NZ_CP032226.1	85410	52.76	tet(A) AAC(6')-Ib-cr6 OXA-1 AAC(3)-IIe CTX-M-15	pCD1	MOBF	MPF_F	MOBP	conjugative	order		ParM	psiB_ECOLX	traN_F			NG_034386.1
Klebsiella	Klebsiella pneumoniae	AR_0046	NZ_CP032227.1	49701	53.01	APH(3'')-Ib APH(6)-Id APH(3')-Ia sul1 qacEdelta1 ANT(3'')-IIa dfrA1 AAC(6')-Il VIM-27 mphA	IncR			MOBF	mobilizable	order		ParB						PA3142
Escherichia	Escherichia coli	AR_0067	NZ_CP032258.1	128033	50.95	TEM-1	pCD1 IncFI(RepB) IncFI(RepE)	MOBF,MOBP	MPF_F	MOBF	conjugative	order	REBASE:M.BstXI	sopB sopB	psiB_ECOLX	traN_F	D616_p97086(srnB) XOC_RS18085 D616_p97105 hok(hok) XOC_RS18085	D616_p97106	NG_034386.1	senB AAA92657
Escherichia	Escherichia coli	AR_0067	NZ_CP032259.1	49921	44.82						non-mobilizable	genus
Escherichia	Escherichia coli	AR_0067	NZ_CP032260.1	87423	53.04	TEM-1	IncK	MOBP	MPF_I	MOBP	conjugative	order			psiB_ECOLX psiA	pilV_KLPN	D616_p112058(pndA)
Escherichia	Escherichia coli	AR_0067	NZ_CP032262.1	75026	50.42	TEM-1	pCD1	MOBF	MPF_F	MOBF	conjugative	order		ParM	psiB_ECOLX	traN_F	D616_p97086(srnB)		NC_002483.1
Pseudomonas	Pseudomonas aeruginosa	AR_0111	NZ_CP032256.1	129422	57.51				MPF_I		non-mobilizable	genus						BW25113_RS01145		pilO
Escherichia	Escherichia coli	AR_0089	NZ_CP032263.1	155784	49.91		pCD1 IncFI(RepB)	MOBF	MPF_F	MOBF	conjugative	order		sopB sopB	psiB_ECOLX	traN_F	STM3033 D616_p97086(srnB) b1563	STM3034 VCA0477	NC_002483.1	pic iroN iroE iroD iroC iroB icsP/sopA mig-14
Escherichia	Escherichia coli	AR_0089	NZ_CP032264.1	101614	50.04	CMY-2	IncK	MOBP	MPF_I	MOBP	conjugative	order			psiA psiB_ECOLX		D616_p112058(pndA) D616_p97105	D616_p97106	NC_023329.1	pilQ pilS pilV
Enterobacter	Enterobacter cloacae	AR_0073	NZ_CP032292.1	105998	52.3		IncFI(RepB)		MPF_T	MOBF	mobilizable	order		sopB sopB			XOC_RS18085 XOC_RS18085 XOC_RS18085 D616_p97105	D616_p97106		PA3142 kpsS rfbC rfbA rffG hasB
Enterobacter	Enterobacter cloacae	AR_0073	NZ_CP032293.1	52591	47.03		IncX	MOBP	MPF_T		conjugative	order		ParG
Enterobacter	Enterobacter cloacae	AR_0073	NZ_CP032294.1	119757	53.13		IncK IncN	MOBF	MPF_F		conjugative	order					XOC_RS18085 hok(hok) b1563 XOC_RS18085	b1564	NG_034386.1	PA3142 PA3142
Shigella	Shigella sonnei	AR_0030	NZ_CP032524.1	94537	50.08	TEM-1	IncK	MOBP	MPF_I	MOBP	conjugative	order			psiB_ECOLX psiA		D616_p112058(pndA)		NC_023329.1	pilV pilS pilQ
Shigella	Shigella sonnei	AR_0030	NZ_CP032525.1	5933	46.65			MOBF		MOB_unknown	mobilizable	multi-phylla
Escherichia	Escherichia coli O157	AR_0430	NZ_CP044137.1	88229	50.28	CMY-2	IncK	MOBP	MPF_I	MOBP	conjugative	order			psiA psiB_ECOLX		D616_p112058(pndA)		NC_023329.1	pilQ pilS pilV
Escherichia	Escherichia coli O157	AR_0430	NZ_CP044138.1	34677	41.19			MOBP	MPF_T		conjugative	family
Escherichia	Escherichia coli O157	AR_0430	NZ_CP044139.1	92728	47.59		IncFI(RepB) IncZ				non-mobilizable	order		sopB sopB	psiB_ECOLX		D616_p97105	D616_p97106	NG_034386.1	hlyD hlyB hlyA hlyC yst1O xcpT yst1F yst1E yst1D stcE ibeC sigA katG
Escherichia	Escherichia coli O157	AR_0430	NZ_CP044141.1	50155	49.66			MOBP			mobilizable	order								stxB stxA
Escherichia	Escherichia coli O157	AR_0429	NZ_CP044142.1	152532	52.48	aadA7 qacEdelta1 sul1 floR tet(A) APH(6)-Id APH(3'')-Ib sul2 CMY-2	IncA/C (=IncP-3)	MOBH,MOBH	MPF_F	MOBH	conjugative	phylum	REBASE:M1.SmoLVII REBASE:M.XmnI
Escherichia	Escherichia coli O157	AR_0429	NZ_CP044144.1	92690	47.6		IncFI(RepB) IncZ				non-mobilizable	order		sopB sopB	psiB_ECOLX		D616_p97105	D616_p97106	NG_034386.1	katG sigA ibeC stcE yst1D yst1E yst1F xcpT exeJ tapD/pilD hlyC hlyA hlyB
Escherichia	Escherichia coli O157	AR_0428	NZ_CP044146.1	92722	47.6		IncZ IncFI(RepB)				non-mobilizable	order		sopB sopB	psiB_ECOLX		D616_p97105	D616_p97106	NG_034386.1	hlyA hlyC tapD/pilD yst1G yst1F yst1E yst1D stcE ibeC sigA katG toxB barB
Escherichia	Escherichia coli O157	AR_0428	NZ_CP044147.1	46899	47.23						non-mobilizable						b0233	BW25113_RS01145 b0232	AE005174.2	gmhA/lpcA lfhA
Escherichia	Escherichia coli O157	AR_0427	NZ_CP044149.1	74819	51.83	dfrA8 TEM-1 sul2 APH(3'')-Ib APH(6)-Id tet(A) floR tetR	pCD1	MOBF	MPF_F	MOBP	conjugative	order		ParM	psiB_ECOLX	traN_F			NG_034386.1	AAA92657
Escherichia	Escherichia coli O157	AR_0427	NZ_CP044150.1	85887	47.97		IncFI(RepB)	MOBP,MOBP			mobilizable	order		sopB sopB	psiB_ECOLX		D616_p97105	D616_p97106	NG_034386.1	hlyB hlyA hlyC tapD/pilD xcpT yst1F yst1E yst1D stcE ibeC sigA
Shigella	Shigella flexneri	AR_0425	NZ_CP044153.1	27094	42.23			MOBP	MPF_T		conjugative	order		ParG				VCA0445
Shigella	Shigella flexneri	AR_0425	NZ_CP044154.1	222114	45.86		IncZ	MOBF,MOBF,MOBP			mobilizable	order		ParB			STM3033 D616_p97105 STM3651	STM3034 D616_p97106 STM3652		ospC1 ospD3/senA ipaH ipaH pic ospC1 ipgB2 ospF ospD2 ospC1 icsP/sopA ospZ ospE2 ipaH YE_RS12240 ipaH ospI icsA/virG virA spa40 spa29 ysaS ysaR spa33 spa32 spa13 spa15 ysaV mxiC mxiD mxiE mxiM mxiL mxiN mxiK mxiJ mxiI mxiH mxiG ipgF ipgE ipgD icsB ipgA ipgB1 sycB ipaB ipaC ipaD ipaA virB ipaJ ospC1
Shigella	Shigella flexneri	AR_0424	NZ_CP044156.1	79831	51.67	ErmB mphA sul1 qacEdelta1 aadA5 dfrA17 TEM-1	IncZ	MOBF	MPF_F	MOBF	conjugative	order		ParM	psiB_ECOLX	traN_F	D616_p97086(srnB)		NG_034386.1
Shigella	Shigella flexneri	AR_0424	NZ_CP044157.1	226601	46.02		IncZ	MOBF,MOBF,MOBP			mobilizable	order		ParB			STM3033 D616_p97105 STM3651	STM3034 D616_p97106 STM3652		ipaH pic ospC1 ipaH ospE2 ipgB2 ospD1 ospF ospD2 ospC1 ospB icsP/sopA ospZ ospE2 ipaH YE_RS12240 ipaH ospI icsA/virG virA spa40 spa29 ysaS ysaR spa33 spa32 spa13 ysaN spa15 ysaV mxiC mxiD mxiE mxiM mxiL mxiN mxiK mxiJ mxiI mxiH mxiG ipgF ipgE ipgD icsB ipgA ipgB1 sycB ipaB ipaC ipaD virB ipaJ ospC1 ospC1 ipaH
Shigella	Shigella flexneri	AR_0423	NZ_CP044159.1	59694	52.5	AAC(6')-Ib-cr6 arr-3 dfrA27 aadA16 qacEdelta1 sul1 QnrB6 qacEdelta1 sul1 tet(A)	IncN	MOBF,MOBP	MPF_T	MOBF,MOBP	conjugative	multi-phylla
Shigella	Shigella flexneri	AR_0423	NZ_CP044160.1	146462	47.82		IncZ	MOBF,MOBF,MOBP			mobilizable	order		ParB			D616_p97105 STM3033	D616_p97106 STM3034		ipaH ospE2 ospZ icsP/sopA ospB ospC1 ospD2 ospF ospD1 ipgB2 ospE2 ipaH ospC1 pic virA icsA/virG ospI ipaH YE_RS12240
Campylobacter	Campylobacter coli	AR_0416	NZ_CP044166.1	192651	27.34	tet(O) APH(2'')-If APH(3')-IIIa		MOBP	MPF_T		conjugative	genus								vipB/mglB vipA/mglA hcp-1 virB11
Campylobacter	Campylobacter jejuni	AR_0415	NZ_CP044168.1	49902	29.53	APH(3')-IIIa APH(2'')-If tet(O)		MOBP	MPF_T		conjugative	genus								virB11
Campylobacter	Campylobacter jejuni	AR_0413	NZ_CP044170.1	72808	30.35	tet(O) APH(3')-IIIa SAT-4 APH(2'')-If tet(O)		MOBP	MPF_T		conjugative	genus
Campylobacter	Campylobacter jejuni	AR_0413	NZ_CP044172.1	25131	28.47			MOBP	MPF_T		conjugative	genus
Campylobacter	Campylobacter coli	AR_0411	NZ_CP044176.1	95141	26.24						non-mobilizable	genus	REBASE:M1.BtsI				CJSA_pVir0046 CJSA_pVir0046
Salmonella	Salmonella enterica subsp. enterica serovar Corvallis	AR_0406	NZ_CP044201.1	11045	61.74	sul2 APH(3'')-Ib APH(6)-Id tet(A)	IncQ (=IncP-4)	MOBQ		MOBQ	mobilizable	phylum
Salmonella	Salmonella enterica subsp. enterica serovar Corvallis	AR_0406	NZ_CP044202.1	10046	50.58	QnrS1		MOBP			mobilizable	multi-phylla
Salmonella	Salmonella enterica subsp. enterica serovar Senftenberg	AR_0405	NZ_CP044204.1	60896	54.73	ANT(2'')-Ia qacL SHV-12 AAC(6')-Ib10 ANT(3'')-IIa OXA-9 TEM-1	IncR			MOBF	mobilizable	order		ParB
Salmonella	Salmonella enterica subsp. enterica serovar Heidelberg	AR_0404	NZ_CP044182.1	37696	41.18			MOBP	MPF_T		conjugative	order					b1563	VCA0445
Salmonella	Salmonella enterica subsp. enterica serovar Heidelberg	AR_0404	NZ_CP044183.1	101684	50.01	CMY-2	IncK	MOBP	MPF_I	MOBP	conjugative	order	REBASE:M.EcoGIX		psiB_ECOLX psiA	pilV_KLPN	D616_p97105 D616_p112058(pndA)	D616_p97106	NC_023329.1	pilV pilS pilQ
Salmonella	Salmonella enterica subsp. enterica serovar Stanley	AR_0403	NZ_CP044185.1	49153	49.25						non-mobilizable
Salmonella	Salmonella enterica subsp. enterica serovar Cubana	AR_0402	NZ_CP044187.1	62424	52.81	dfrA14 KPC-2 TEM-1 APH(6)-Id APH(3'')-Ib sul2	IncN	MOBF	MPF_T	MOBF	conjugative	class
Salmonella	Salmonella enterica subsp. enterica serovar Albert	AR_0401	NZ_CP044189.1	90935	52.07	CMY-2 sul2 APH(3'')-Ib APH(6)-Id tet(A) floR	IncA/C (=IncP-3)	MOBH,MOBH	MPF_F	MOBH	conjugative	phylum
Salmonella	Salmonella enterica subsp. enterica serovar Albert	AR_0401	NZ_CP044190.1	120390	50.98	APH(3'')-Ib APH(6)-Id APH(3')-Ia sul2 tet(B) tetR	IncZ IncFI(RepE) IncFI(RepB)	MOBF	MPF_F	MOBF	conjugative	order	REBASE:M.EcoGIX	sopB sopB	psiB_ECOLX	traN_F	D616_p97086(srnB) STM3033 D616_p97105	STM3034 D616_p97106	NC_002483.1	iutA iucD iucC iucB iucA
Enterococcus	Enterococcus faecalis	AR_0780	NZ_CP063981.1	65096	35.14	ErmA fexA	Rep-family_9	MOBC			mobilizable	genus					CJSA_pVir0046			ctrD asa1
