# Supplementary material for: Characterizing conjugative plasmids from an antibiotic-resistant dataset for use as broad-host delivery vectors
Source: Front Microbiol. 2023 Jun 14;14:1199640. doi: 10.3389/fmicb.2023.1199640 (PMC10301749; doi:10.3389/fmicb.2023.1199640)
Supplement: Supplementary file 2 [file Table_2.XLSX]

## Sheet: Rep
Protein ID	Incompatibility Type		Obtained from Shintani et al 2015
YP_002995501	IncA/C (=IncP-3)
AAA98176	IncB/O
NP_061424	IncFI(RepE)
BAA97903	IncFI(RepB)
AAB17112	IncFII(RepA1)
YP_006953797	IncFII(RepA4)
ABD64829	IncG/U (=IncP-6)
AAF69874	IncH
AAZ76529	IncI
AAA98310	IncK
AAN87697	IncL/M
AAB36884	IncN
AAA16606	IncP (=IncP-1)
ADB23351	IncQ (=IncP-4)
ABG56801	IncR
AAB67987	IncS (=IncHI2)
AAA91589	IncT
YP_001874895	IncW
AAA98317	IncX
AAA98134	IncZ
YP_008532401	IncP-2
BAC41582	IncP-7
CAC86738	IncP-9
YP_003813101	Inc1
CAA26366	Inc4
NP_932180	Inc7
NP_040436	Inc8
AAA98216	Inc9 (partial)
NP_943086	Inc10
AAA25603	Inc11
NP_040434	Inc13
AAA26669	Inc14
YP_003864107	Inc18
J01566	RNAII(ColE1 family)
BAA06292	ColE2
BAA06293	ColE3
ACT97177	PromA
CAA41700	Rep(pPS10)
CAA71788	Rep(pECB2)
AAB59157	Rep(pSC101)
CAA60390	Rep(pIP417)
AAA27381	Rep(pTF-FC2)
AAA98077	Rep(pFA3)
AAS58528	pCD1
YP_001700720	GR1
YP_001840858	GR2
ADM89091	GR3
ADM89093	GR4
ADM89094	GR5
YP_001840886	GR6
YP_001705678	GR7
AAT09649	GR8
YP_001705685	GR9
YP_001840859	GR10
YP_001708679	GR11
YP_001700728	GR12
YP_001708702	GR13
YP_001708697	GR14
YP_001705694	GR15
AAA99423	GR16
YP_001083085	GR17
YP_001700748	GR18
ACX70400	GR19
CAA28527	RepA(pRiAb)
CAA28530	RepB(pRiAb)
CAA28532	RepC(pRiAb)
YP_001542302	RepA(DFL12)
YP_001542301	RepB(DFL12)
YP_001542300	RepC(DFL12)
YP_001642333	Rep7
YP_008411027	Rep20
YP_001165688	pNL1
YP_001165975	pNL2
YP_001260151	pSWIT01
YP_003546976	pCHQ1
YP_003543403	pUT1
YP_003550320	pUT2
YP_740299	pLB1
YP_008431386	Rep(pBt40)
CAA35647	Rep-family_1
CAC29157	Rep-family_2
YP_009075935	Rep-family_3
YP_009074603	Rep-family_4
BAB43870	Rep-family_5
CAA11136	Rep-family_6
YP_492686	Rep-family_7
NP_943086	Rep-family_7b
NP_071995	Rep-family_8
AAA25553	Rep-family_9
AAA98135	Rep-family_10
AAC98833	Rep-family_10b
AAN76344	Rep-family_11
ABD24335	Rep-family_12
NC_002013	Rep-family_13
ABZ01942	Rep-family_14
YP_492687	Rep-family_15
CAG43240	Rep-family_16
AAO52855	Rep-family_17
AAL05545	Rep-family_18
NP_932180	Rep-family_19
BAC54493	Rep-family_20
AAS50176	Rep-family_21
CAA27141	Rep-family_22
EU366902	Rep-family_23
ACZ58693	Rep-family_24
NP_863188	RepA(pNG2)
NP_862300	RepA(pCG4)
AAD08690	Rep(pBL1)
NP_776227	RepA(pCG2)
NP_776218	RepA(pAG3)
NP_776231	RepA(pGA2)
BAA78091	Rep(pCG1)
AAO18205	RepA(pCRY4)
YP_025523	Rep(pMUM001)
NP_862580	Rep(pCLP)
YP_707798	Rep(pRHL1)
YP_709072	Rep(pRHL3)
YP_345115	Rep(pREC1)
YP_345164	Rep(pREC2)
NP_954861	Rep(pB264)
NP_639791	Rep1A
NP_639731	Rep2A
NP_639658	Rep3A
NP_639698	Tac
NP_639700	Tpc
YP_008995504	Rep(pRL2)
YP_008995504	Rep(pFRL2)
NP_851517	Rep(pSLA2-L)
NP_851523	TapR1
NP_851524	TpgR1
NP_053439	Rep(pSNA1)
YP_328727	Rep(pSVH1)
YP_008998137	Rep(pZL12)
NP_040441	Rep(pIJ101)
NP_044352	Rep(pJV1)
YP_001965207	Rep(pFRL1_1)
YP_001965219	Rep(pFRL1_2)
NP_862684	Rep(pKJ50)
NP_848158	Rep(pNAC2)
NP_848150	Rep(pNAC3)
NP_694604	Rep(pDOJH10S)
NP_052879	Rep(pCIBb1)
NP_613078	Rep(p4M)
NP_067615	Rep(p545)
NP_775693	Rep(pPG01)
YP_003329157	Rep(pC1)
YP_783836	Rep(pDU1)
AAA99876	Rep(pFDA)
AII99715	Rep(pDC1)
AII99713	Rep(pANS)

## Sheet: Virulence
Protein ID	Virulence Gene			Obtained from VFDB Core Dataset
VFG037176(gb_WP_001081735)	plc1
VFG037177(gb_WP_000632986)	plc2
VFG037203(gb_WP_000079188)	plcD
VFG037218(gb_WP_000983821)	basJ
VFG037232(gb_WP_001093095)	basI
VFG037246(gb_WP_001032906)	basH
VFG037260(gb_WP_001095752)	barB
VFG037274(gb_WP_001281538)	barA
VFG037288(gb_WP_000603876)	basG
VFG037302(gb_WP_001018264)	basF
VFG037316(gb_WP_000744381)	entE
VFG037330(gb_WP_001177743)	basD
VFG037344(gb_WP_000717759)	basC
VFG037358(gb_WP_001073030)	bauA
VFG037372(gb_WP_001104139)	bauB
VFG037386(gb_WP_000582115)	bauE
VFG037400(gb_WP_001223274)	bauC
VFG037414(gb_WP_012391956)	bauD
VFG037428(gb_WP_000939834)	basB
VFG037442(gb_WP_000910253)	basA
VFG037456(gb_WP_000160878)	bauF
VFG037470(gb_WP_001105554)	ACICU_RS04565
VFG037482(gb_WP_004748062)	ACICU_RS04570
VFG037490(gb_WP_001240499)	ACICU_RS04575
VFG037497(gb_WP_085947929)	ACICU_RS04580
VFG037505(gb_WP_002002089)	ACICU_RS04585
VFG037513(gb_WP_085947930)	ACICU_RS04590
VFG037521(gb_WP_000837764)	ACICU_RS04595
VFG037529(gb_WP_002062720)	hemO
VFG037537(gb_WP_000359621)	ACICU_RS04605
VFG037547(gb_WP_000061137)	ACICU_RS04610
VFG037560(gb_WP_000790104)	csuA/B
VFG037586(gb_WP_000876480)	csuB
VFG037599(gb_WP_001988023)	csuC
VFG037612(gb_WP_000603301)	csuD
VFG037625(gb_WP_001022730)	csuE
VFG037638(gb_WP_193759656)	bap
VFG037664(gb_WP_001061322)	pgaB
VFG037678(gb_WP_000866237)	pgaC
VFG037692(gb_WP_000786639)	pgaD
VFG037705(gb_WP_000010636)	adeF
VFG037720(gb_WP_001027056)	adeG
VFG037735(gb_WP_000633124)	adeH
VFG037747(gb_WP_001984639)	lpxM
VFG037762(gb_WP_000078878)	lpxL
VFG037777(gb_WP_000867091)	lpsB
VFG037792(gb_WP_000064875)	lpxA
VFG037807(gb_WP_000013434)	lpxB
VFG037822(gb_WP_000240700)	lpxC
VFG037837(gb_WP_000868104)	lpxD
VFG037852(gb_WP_001075965)	ACICU_RS00395
VFG037867(gb_WP_001165990)	ACICU_RS00400
VFG037882(gb_WP_000872593)	ACICU_RS00405
VFG037897(gb_WP_001165095)	tviB
VFG037912(gb_WP_000939040)	pseB
VFG037927(gb_WP_000470518)	pseC
VFG037942(gb_WP_001175206)	pseF
VFG037957(gb_WP_000666850)	pseG
VFG037972(gb_WP_000886731)	pseH
VFG037987(gb_WP_000037963)	pseI
VFG038002(gb_WP_000172211)	ACICU_RS00445
VFG038017(gb_WP_001010045)	ACICU_RS00450
VFG038047(gb_WP_000994240)	ACICU_RS00460
VFG038062(gb_WP_000515955)	ACICU_RS00465
VFG038091(gb_WP_000826956)	ACICU_RS00475
VFG038105(gb_WP_000591436)	galU
VFG038119(gb_WP_000686134)	ACICU_RS00485
VFG038132(gb_WP_000045495)	pgi
VFG038144(gb_WP_001062908)	galE
VFG038155(gb_WP_000209960)	ACICU_RS00500
VFG038176(gb_WP_000777882)	ompA
VFG038191(gb_WP_002023245)	abaI
VFG038205(gb_WP_000446779)	abaR
VFG038249(gb_WP_003384760)	pbpG
VFG050303(gb_WP_001045628.1)	ata
VFG050313(gb_WP_004644147.1)	pilM
VFG050328(gb_WP_000201227.1)	pilN
VFG050342(gb_WP_000076098.1)	pilO
VFG050357(gb_WP_000695065.1)	pilP
VFG050372(gb_WP_001017033.1)	pilQ
VFG050386(gb_WP_000355489.1)	pilT
VFG050400(gb_WP_000347039.1)	pilU
VFG050414(gb_WP_002027454.1)	pilF
VFG050428(gb_WP_000128073.1)	fimV
VFG050443(gb_WP_000993715.1)	pilA
VFG050457(gb_WP_001274990.1)	pilB
VFG050470(gb_WP_000279216.1)	pilC
VFG050484(gb_WP_001152285.1)	gspO/pilD
VFG050499(gb_WP_000755268.1)	tsaP
VFG050514(gb_WP_001214067.1)	fimU
VFG050527(gb_WP_002194578.1)	pilV
VFG050540(gb_WP_000079192.1)	pilW
VFG050554(gb_WP_000149377.1)	pilX
VFG050567(gb_WP_000768964.1)	pilY1
VFG050581(gb_WP_001046420.1)	ACICU_RS16840
VFG050595(gb_WP_000788342.1)	pilE
VFG050610(gb_WP_000477147.1)	fimT
VFG050625(gb_WP_000389061.1)	pilG
VFG050640(gb_WP_000101096.1)	pilH
VFG050655(gb_WP_000729757.1)	pilI
VFG050670(gb_WP_000505931.1)	pilJ
VFG050685(gb_WP_001160337.1)	pilS
VFG050699(gb_WP_000840548.1)	pilR
VFG050712(gb_WP_000730343.1)	gspN
VFG050727(gb_WP_000870033.1)	gspC
VFG050742(gb_WP_001196426.1)	gspD
VFG050757(gb_WP_001166319.1)	gspE1
VFG050772(gb_WP_001020922.1)	gspE2
VFG050787(gb_WP_001112089.1)	gspF
VFG050802(gb_WP_000865310.1)	gspG
VFG050817(gb_WP_000841373.1)	gspH
VFG050832(gb_WP_000836911.1)	gspI
VFG050860(gb_WP_000301479.1)	gspK
VFG050874(gb_WP_001989189.1)	gspL
VFG050889(gb_WP_000783000.1)	gspM
VFG050901(gb_WP_005119983.1)	cpaA
VFG050910(gb_WP_001178477.1)	vgrG/tssI
VFG050911(gb_WP_000934999.1)	vgrG/tssI
VFG050912(gb_WP_000898330.1)	vgrG/tssI
VFG050946(gb_WP_000083625.1)	tssL
VFG050959(gb_WP_000556915.1)	tssM
VFG050972(gb_WP_000972583.1)	tagX
VFG050986(gb_WP_001047031.1)	tssE
VFG051000(gb_WP_000568832.1)	tssF
VFG051014(gb_WP_001190395.1)	tssG
VFG051028(gb_WP_000471445.1)	tssK
VFG051042(gb_WP_000653195.1)	hcp/tssD
VFG051056(gb_WP_001119042.1)	tssB
VFG051070(gb_WP_001066523.1)	tssC
VFG051084(gb_WP_000020713.1)	tssA
VFG051098(gb_WP_002001416.1)	clpV/tssH
VFG051109(gb_YP_001083177.1)	tse1
VFG051110(gb_YP_001083606.1)	tse2
VFG051111(gb_YP_001084320.1)	tse3
VFG051112(gb_YP_001086354.1)	tse4
VFG038261(gb_WP_016352107)	exeA
VFG038265(gb_WP_016352108)	exeB
VFG038269(gb_WP_075384415)	exeC
VFG038273(gb_WP_016349335)	exeD
VFG038277(gb_WP_016349336)	exeE
VFG038281(gb_WP_016349337)	exeF
VFG038285(gb_WP_005308483)	exeG
VFG038289(gb_WP_016349339)	exeH
VFG038293(gb_WP_016349340)	exeI
VFG038297(gb_WP_016349341)	exeJ
VFG038301(gb_WP_016349342)	exeK
VFG038305(gb_WP_016349343)	exeL
VFG038309(gb_WP_016349344)	exeM
VFG038313(gb_WP_043118380)	exeN
VFG038317(gb_WP_016352170)	tapD/pilD
VFG038320(gb_WP_005320812)	ascL
VFG038321(gb_WP_005320811)	ascK
VFG038322(gb_WP_180975055)	ascJ
VFG038323(gb_WP_005320806)	ascI
VFG038324(gb_WP_005320804)	ascH
VFG038325(gb_WP_005320802)	ascG
VFG038326(gb_WP_005320800)	ascF
VFG038327(gb_WP_005320797)	ascE
VFG038328(gb_WP_005320795)	ascD
VFG038329(gb_WP_011899438)	ascC
VFG038330(gb_WP_011899439)	ascB
VFG038331(gb_WP_005320790)	exsD
VFG038332(gb_WP_192914500)	exsA
VFG038333(gb_WP_011899440)	exsB
VFG038334(gb_WP_005320785)	exsE
VFG038335(gb_WP_005320783)	exsC
VFG038336(gb_WP_005320781)	aopD
VFG038337(gb_WP_005320780)	aopB
VFG038338(gb_WP_005320778)	acrH
VFG038339(gb_WP_005320777)	acrV
VFG038340(gb_WP_005320774)	acrG
VFG038341(gb_WP_005320772)	acrR
VFG038342(gb_WP_005320770)	ascV
VFG038343(gb_WP_005320768)	ascY
VFG038344(gb_WP_005320766)	ascX
VFG038345(gb_WP_005320764)	acr2
VFG038346(gb_WP_005320760)	acr1
VFG038347(gb_WP_005320757)	aopN
VFG038348(gb_WP_005320755)	ascN
VFG038349(gb_WP_005320751)	ascO
VFG038350(gb_WP_005320749)	ascP
VFG038351(gb_WP_005320747)	ascQ
VFG038352(gb_WP_005320745)	ascR
VFG038353(gb_WP_005320743)	ascS
VFG038354(gb_WP_005320741)	ascT
VFG038355(gb_WP_005320739)	ascU
VFG038357(gb_WP_005320736)	sycX
VFG038358(gb_WP_005321603)	sycH
VFG038359(gb_WP_005321607)	aopH
VFG038360(gb_WP_011899436)	ati2
VFG038361(gb_WP_005320818)	ati1
VFG038362(gb_WP_005321180)	sycO
VFG038363(gb_WP_005321178)	aopO
VFG038364(gb_WP_005320615)	aexT
VFG038365(gb_WP_011705044)	hcp1
VFG038367(gb_WP_011705045)	vgrG1
VFG038369(gb_WP_011705706)	hcp
VFG038371(gb_WP_011705707)	vgrG2
VFG038373(gb_WP_011705708)	atsA
VFG038374(gb_WP_011705709)	atsB
VFG038375(gb_WP_011705710)	atsC
VFG038376(gb_WP_164927604)	atsD
VFG038378(gb_WP_011705712)	vipA
VFG038380(gb_WP_043163044)	vipB
VFG038381(gb_WP_011705714)	atsG
VFG038383(gb_WP_011705715)	atsH
VFG038385(gb_WP_011705716)	atsI
VFG038387(gb_WP_011705717)	atsJ
VFG038389(gb_WP_011705718)	atsK
VFG038391(gb_WP_011705719)	atsL
VFG038393(gb_WP_010634228)	dotU
VFG038395(gb_WP_011705721)	clpB
VFG038397(gb_WP_011705722)	vasH
VFG038399(gb_WP_011705723)	atsP
VFG038401(gb_WP_011705724)	atsQ
VFG038402(gb_WP_011705725)	vasK/icmF
VFG038403(gb_WP_011705726)	atsS
VFG038405(gb_WP_011705727)	AHA_RS09305
VFG038407(gb_WP_011705728)	vgrG3
VFG038409(gb_WP_011704492)	fimA
VFG038413(gb_WP_043118350)	fimC
VFG038417(gb_WP_016349294)	fimD
VFG038421(gb_WP_043118352)	fimE
VFG038425(gb_WP_016349296)	fimF
VFG038429(gb_WP_016352167)	tapA
VFG038432(gb_WP_016352168)	tapB
VFG038436(gb_WP_016352169)	tapC
VFG038444(gb_WP_075384315)	tapM
VFG038448(gb_WP_016351632)	tapN
VFG038452(gb_WP_016351631)	tapO
VFG038456(gb_WP_016351630)	tapP
VFG038460(gb_WP_043119325)	tapQ
VFG038464(gb_WP_011707389)	tapT
VFG038468(gb_WP_016351972)	tapU
VFG038472(gb_WP_011706550)	tapW
VFG038476(gb_WP_016349433)	tppA
VFG038480(gb_WP_016349429)	tppB
VFG038488(gb_WP_016349432)	tapY1
VFG038493(gb_WP_016349428)	tppE
VFG038497(gb_WP_016351992)	tppF
VFG038501(gb_WP_043119142)	tapV
VFG038505(gb_WP_011705643)	tapF
VFG038509(gb_WP_016350158)	flpL
VFG038513(gb_WP_016350157)	flpK
VFG038517(gb_WP_016350156)	flpJ
VFG038521(gb_WP_016350155)	flpI
VFG038525(gb_WP_043118801)	flpH
VFG038529(gb_WP_016350153)	flpG
VFG038533(gb_WP_016350152)	flpF
VFG038537(gb_WP_016350151)	flpE
VFG038541(gb_WP_016350150)	flpD
VFG038545(gb_WP_043118798)	flpC
VFG038549(gb_WP_016350148)	flpB
VFG038553(gb_WP_016350147)	flpA
VFG038557(gb_WP_011705350)	flp1
VFG038561(gb_WP_016349168)	mshQ
VFG038564(gb_WP_016349167)	mshP
VFG038568(gb_WP_016349166)	mshO
VFG038572(gb_WP_016349165)	mshD
VFG038576(gb_WP_016349164)	mshC
VFG038578(gb_WP_016349163)	mshA
VFG038581(gb_WP_043118279)	mshB
VFG038584(gb_WP_016349161)	mshF
VFG038587(gb_WP_016349160)	mshG
VFG038590(gb_WP_043118275)	mshE
VFG038593(gb_WP_016349158)	mshN
VFG038596(gb_WP_016349157)	mshM
VFG038600(gb_WP_016349156)	mshL
VFG038603(gb_WP_016349155)	mshK
VFG038607(gb_WP_016349154)	mshJ
VFG038611(gb_WP_016349153)	mshI1
VFG038615(gb_WP_016349152)	mshI
VFG038619(gb_WP_016349413)	motX
VFG038623(gb_WP_011705271)	fliE
VFG038627(gb_WP_016350050)	fliF
VFG038631(gb_WP_011705273)	fliG
VFG038635(gb_WP_016350051)	fliH
VFG038639(gb_WP_011705275)	fliI
VFG038643(gb_WP_011705276)	fliJ
VFG038647(gb_WP_016350053)	fliK
VFG038651(gb_WP_011705278)	fliL
VFG038655(gb_WP_011705279)	fliM
VFG038659(gb_WP_011705280)	fliN
VFG038663(gb_WP_005298795)	fliO
VFG038667(gb_WP_016350054)	fliP
VFG038671(gb_WP_011705282)	fliQ
VFG038675(gb_WP_011705283)	fliR
VFG038679(gb_WP_016350055)	flhB
VFG038683(gb_WP_016350056)	flhA
VFG038687(gb_WP_016350057)	flhF
VFG038691(gb_WP_010634619)	flhG
VFG038695(gb_WP_017409955)	fliA
VFG038699(gb_WP_010634617)	cheY
VFG038703(gb_WP_011705289)	cheZ
VFG038707(gb_WP_016350059)	cheA-2
VFG038711(gb_WP_016350060)	cheB-2
VFG038715(gb_WP_024943899)	motA
VFG038719(gb_WP_016350061)	pomB
VFG038723(gb_WP_011705294)	AHML_RS07540
VFG038727(gb_WP_011705295)	cheW
VFG038731(gb_WP_016350347)	flaA
VFG038740(gb_WP_043118910)	flaG
VFG038743(gb_WP_016350352)	flaH
VFG038747(gb_WP_016350353)	flaJ
VFG038753(gb_WP_024944879)	motY
VFG038756(gb_WP_011706626)	flrC
VFG038760(gb_WP_016351312)	flrB
VFG038764(gb_WP_017409846)	flrA
VFG038768(gb_WP_016351318)	flgL
VFG038772(gb_WP_016351319)	flgK
VFG038776(gb_WP_016351320)	flgJ
VFG038780(gb_WP_011706637)	flgI
VFG038784(gb_WP_011706638)	flgH
VFG038788(gb_WP_011706639)	flgG
VFG038792(gb_WP_011706640)	flgF
VFG038796(gb_WP_016351321)	flgE
VFG038800(gb_WP_016351322)	flgD
VFG038804(gb_WP_011706643)	flgC
VFG038808(gb_WP_011706644)	flgB
VFG038812(gb_WP_011706645)	cheR-3
VFG038816(gb_WP_011706646)	cheV
VFG038820(gb_WP_161785096)	flgA
VFG038824(gb_WP_011706648)	flgM
VFG038828(gb_WP_011706649)	flgN
VFG038832(gb_WP_016351724)	pomB2
VFG038836(gb_WP_011707085)	pomA2
VFG038840(gb_WP_005300916)	flmH
VFG038845(gb_WP_016351249)	nueA
VFG038848(gb_WP_016350360)	flmD
VFG038851(gb_WP_016350359)	nueB
VFG038855(gb_WP_005314317)	lfiM
VFG038856(gb_WP_005314315)	lfiN
VFG038857(gb_WP_005314307)	fliP
VFG038858(gb_WP_005314303)	lfiQ
VFG038859(gb_WP_005314301)	lfiR
VFG038860(gb_WP_005314298)	lfhB
VFG038861(gb_WP_005314296)	lfhA
VFG038862(gb_WP_011898282)	lafK
VFG038863(gb_WP_005314292)	lfiE
VFG038864(gb_WP_073531776)	fliF
VFG038865(gb_WP_005314289)	fliG
VFG038866(gb_WP_005314286)	lfiH
VFG038867(gb_WP_005314284)	lfiI
VFG038868(gb_WP_005314282)	lfiJ
VFG038869(gb_WP_005314279)	lfgN
VFG038870(gb_WP_005314277)	lfgM
VFG038871(gb_WP_005314274)	lfgA
VFG038872(gb_WP_005314272)	lfgB
VFG038873(gb_WP_005314270)	flgC
VFG038874(gb_WP_005314263)	flgE
VFG038875(gb_WP_005314261)	lfgF
VFG038876(gb_WP_005314259)	lfgG
VFG038877(gb_WP_005314257)	lfgH
VFG038878(gb_WP_005314254)	flgI
VFG038879(gb_WP_005314251)	flgJ
VFG038880(gb_WP_005314250)	lfgK
VFG038881(gb_WP_005314249)	lfgL
VFG038882(gb_WP_005314247)	maf-5
VFG038883(gb_WP_005314227)	lafB
VFG038884(gb_WP_005314225)	lafC
VFG038885(gb_WP_005314224)	lafX
VFG038886(gb_WP_005314222)	lafE
VFG038887(gb_WP_005314220)	lafF
VFG038888(gb_WP_011898286)	lafS
VFG038889(gb_WP_005314215)	lafT
VFG038890(gb_WP_005314213)	lafU
VFG038892(gb_WP_043118302)	aerA/act
VFG038922(gb_WP_011450238)	virB9-2
VFG038929(gb_WP_011450501)	virB3
VFG038936(gb_WP_011450502)	virB4-1
VFG038943(gb_WP_011450503)	virB6-1
VFG038950(gb_WP_052689204)	virB6-2
VFG038957(gb_WP_011450505)	virB6-3
VFG038964(gb_WP_011450506)	virB6-4
VFG038972(gb_WP_020848864)	virB8-2
VFG038979(gb_WP_020849092)	virB4-2
VFG038986(gb_WP_011451179)	virB2-8
VFG038993(gb_WP_011451180)	virB2-7
VFG038997(gb_WP_011451181)	virB2-6
VFG039001(gb_WP_011451182)	virB2-5
VFG039005(gb_WP_011451183)	virB2-4
VFG039009(gb_WP_044104324)	virB2-3
VFG039014(gb_WP_011451193)	virB2-2
VFG039018(gb_WP_011451194)	virB2-1
VFG039025(gb_WP_011451400)	virD4
VFG039032(gb_WP_011451401)	virB11
VFG039039(gb_WP_011451402)	virB10
VFG039046(gb_WP_021799173)	virB9-1
VFG039053(gb_WP_080502932)	virB8-1
VFG039059(gb_WP_155238385)	virB7
VFG039063(gb_WP_011450840)	ankA
VFG039070(gb_WP_020848986)	ats-1
VFG039077(gb_WP_011450469)	ompA
VFG039084(gb_WP_011450388)	asp14
VFG039088(gb_WP_011451002)	aipA
VFG045355(gb_WP_155237521)	APH_RS00765
VFG045357(gb_WP_080502891)	APH_RS00770
VFG045360(gb_WP_044104250)	APH_RS02770
VFG045361(gb_WP_011450766)	APH_RS02775
VFG045362(gb_WP_101631099)	APH_RS02780
VFG045365(gb_WP_011451169)	APH_RS04435
VFG045368(gb_WP_044108165)	APH_RS04625
VFG045369(gb_WP_011451214)	APH_RS04690
VFG045370(gb_WP_080502912)	APH_RS04695
VFG045372(gb_WP_011451222)	APH_RS04720
VFG045373(gb_WP_044108207)	APH_RS04800
VFG045374(gb_WP_011451253)	APH_RS04890
VFG045375(gb_WP_044108210)	APH_RS04925
VFG045376(gb_WP_011451266)	APH_RS04960
VFG045377(gb_WP_155237524)	APH_RS05000
VFG045378(gb_WP_011451280)	APH_RS05055
VFG045379(gb_WP_044108213)	APH_RS05075
VFG045381(gb_WP_080502923)	APH_RS05145*
VFG045383(gb_WP_044108215)	APH_RS05155
VFG045384(gb_WP_011451309)	APH_RS05210
VFG045385(gb_WP_155237525)	APH_RS05320
VFG045386(gb_WP_011451361)	APH_RS05515
VFG045387(gb_WP_011451394)	APH_RS05670
VFG045388(gb_WP_155237504)	APH_RS00135
VFG045390(gb_WP_020848750)	APH_RS00360
VFG045391(gb_WP_020848765)	APH_RS00540
VFG045393(gb_WP_020848772)	APH_RS00595
VFG045395(gb_WP_020848796)	APH_RS06240
VFG045396(gb_WP_020848801)	APH_RS06730
VFG045400(gb_WP_020848897)	APH_RS06355
VFG045402(gb_WP_020848997)	APH_RS03565
VFG045403(gb_WP_020849018)	APH_RS05870
VFG045407(gb_WP_020849024)	APH_RS03760
VFG045408(gb_WP_020849031)	APH_RS03875
VFG045409(gb_WP_020849032)	APH_RS03880
VFG045411(gb_WP_020849062)	APH_RS04215
VFG045413(gb_WP_133121395)	APH_RS06575
VFG045414(gb_WP_020849070)	APH_RS04275
VFG045418(gb_WP_020849075)	APH_RS04305
VFG045424(gb_WP_020849091)	APH_RS06750
VFG045425(gb_WP_080502910)	APH_RS04610
VFG045426(gb_WP_020849102)	APH_RS06755
VFG045428(gb_WP_080502914)	APH_RS04725
VFG045431(gb_WP_080502916)	APH_RS04765
VFG045432(gb_WP_155237519)	APH_RS04795
VFG045437(gb_WP_080502919)	APH_RS04995
VFG045438(gb_WP_155237404)	APH_RS05015
VFG045439(gb_WP_080502920)	APH_RS05020
VFG045440(gb_WP_080502921)	APH_RS05050
VFG045441(gb_WP_080502922)	APH_RS05065
VFG045452(gb_WP_020849172)	APH_RS05455
VFG045453(gb_WP_080502927)	APH_RS05460
VFG045454(gb_WP_080502929)	APH_RS05495
VFG045462(gb_WP_020849198)	APH_RS05705
VFG045463(gb_WP_080502933)	APH_RS05735
VFG045469(gb_WP_011451366)	APH_RS05540
VFG000676(gb_AAD32411)	lef
VFG000677(gb_AAD32414)	pagA
VFG000678(gb_AAD32426)	cya
VFG000679(gb_AAF13660)	dep/capD
VFG000680(gb_AAF13661)	capA
VFG000681(gb_AAF13662)	capC
VFG000682(gb_AAF13663)	capB
VFG002040(gb_AAD32423)	AAD32423
VFG016216(gb_WP_000576719)	alo
VFG016223(gb_WP_000830634)	cytK
VFG016254(gb_WP_000976151)	hblA
VFG016260(gb_WP_000714434)	hblD
VFG016263(gb_WP_000850151)	hblC
VFG016268(gb_WP_000751851)	nheA
VFG016276(gb_WP_000162971)	nheB
VFG016338(gb_WP_001253006)	inhA
VFG016346(gb_WP_001035927)	BAS_RS06430
VFG016362(gb_WP_000959117)	hal
VFG040864(gb_WP_001172770)	essC
VFG040865(gb_WP_000807831)	esxB
VFG040867(gb_WP_001050360)	BAS_RS10600
VFG040868(gb_WP_000404139)	esxL
VFG049919(gb_AAD32394)	bslA
VFG049956(gb_WP_000679659)	asbA
VFG049962(gb_WP_011053144)	asbB
VFG049968(gb_WP_000909602)	asbC
VFG049974(gb_WP_001250565)	asbD
VFG049980(gb_WP_000200715)	asbE
VFG049986(gb_WP_000877695)	asbF
VFG049993(gb_WP_001100504)	dhbA
VFG050004(gb_WP_001001950)	dhbC
VFG050015(gb_WP_000955350)	dhbE
VFG050026(gb_WP_001007279)	dhbB
VFG050037(gb_WP_001133943)	dhbF
VFG050111(gb_WP_050412751)	cer
VFG050112(gb_WP_001008264)	cesD
VFG050113(gb_WP_000590108)	cesC
VFG050114(gb_WP_000953496)	cesB
VFG050115(gb_WP_002081542)	cesA
VFG050116(gb_WP_000764755)	cesT
VFG050117(gb_WP_000680399)	cesP
VFG050118(gb_WP_000291846)	cesH
VFG002231(gb_WP_011181127)	virB2
VFG002232(gb_WP_011181128)	virB3
VFG002233(gb_WP_011181129)	virB4
VFG002234(gb_WP_011181130)	virB5
VFG002235(gb_WP_011181131)	virB6
VFG002236(gb_WP_034448084)	virB7
VFG002237(gb_WP_193581815)	virB8
VFG002238(gb_WP_034448090)	virB9
VFG002239(gb_WP_011181135)	virB10
VFG002240(gb_WP_011181136)	virB11
VFG002241(gb_WP_011181138)	bepA
VFG002242(gb_WP_011181139)	virD4
VFG002243(gb_WP_011181140)	bepB
VFG002244(gb_WP_011181141)	bepC
VFG002245(gb_WP_011181142)	bepD
VFG002246(gb_WP_011181143)	bepE
VFG002247(gb_WP_011181144)	bepF
VFG002248(gb_WP_011181145)	bepG
VFG002249(gb_WP_011181321)	trwN
VFG002250(gb_WP_011181323)	trwL1
VFG002251(gb_WP_011181324)	trwL2
VFG002252(gb_WP_011181325)	trwL3
VFG002253(gb_WP_011181326)	trwL4
VFG002254(gb_WP_011181327)	trwL5
VFG002255(gb_WP_011181328)	trwL6
VFG002256(gb_WP_011181329)	trwL7
VFG002257(gb_WP_196230014)	trwL8
VFG002258(gb_WP_011181331)	trwM
VFG002259(gb_WP_011181332)	trwK
VFG002260(gb_WP_011181333)	trwJ1
VFG002261(gb_WP_011181334)	trwI1
VFG002262(gb_WP_011181335)	trwH1
VFG002263(gb_WP_011181336)	trwJ2
VFG002264(gb_WP_011181337)	trwI2
VFG002265(gb_WP_011181338)	trwH2
VFG002266(gb_WP_011181339)	trwG
VFG002267(gb_WP_011181340)	trwF
VFG002268(gb_WP_011181341)	trwE
VFG002269(gb_WP_011181342)	trwD
VFG002270(gb_WP_011180104)	badA/vomp/brp
VFG016757(gb_WP_011807398)	flaA
VFG016758(gb_WP_005767719)	fliQ
VFG016759(gb_WP_005767721)	flgD
VFG016760(gb_WP_005767722)	flbT
VFG016761(gb_WP_005767724)	flaF
VFG016762(gb_WP_005767726)	flgL
VFG016763(gb_WP_005767728)	flgK
VFG016764(gb_WP_005767730)	flgE
VFG016765(gb_WP_005767744)	motB
VFG016766(gb_WP_005767748)	fliF
VFG016767(gb_WP_005767758)	fliP
VFG016768(gb_WP_005767760)	fliL
VFG016769(gb_WP_005767762)	flgH
VFG016770(gb_WP_005767766)	flgI
VFG016771(gb_WP_005767768)	flgA
VFG016772(gb_WP_005767770)	flgG
VFG016773(gb_WP_005767773)	fliE
VFG016774(gb_WP_005767776)	flgC
VFG016775(gb_WP_005767779)	flgB
VFG016776(gb_WP_005767781)	fliI
VFG016777(gb_WP_005767784)	flgF
VFG016778(gb_WP_005767791)	motA
VFG016779(gb_WP_005767793)	fliM
VFG016780(gb_WP_035453371)	fliY
VFG016781(gb_WP_005767802)	fliG
VFG016782(gb_WP_005767804)	flhB
VFG016783(gb_WP_005767815)	fliR
VFG016784(gb_WP_005767817)	flhA
VFG016802(gb_WP_034448447)	korB
VFG018683(gb_WP_034448453)	korA
VFG041370(gb_WP_011181137)	AYT27_RS06815
VFG000001(gb_WP_010930610)	fhaB
VFG000002(gb_WP_010930159)	prn
VFG000003(gb_WP_019248935)	fim2
VFG000004(gb_WP_010930436)	fim3
VFG000005(gb_WP_010931071)	fimX
VFG000007(gb_WP_010930611)	fimB
VFG000008(gb_WP_010930612)	fimC
VFG000009(gb_WP_050849356)	fimD
VFG000010(gb_WP_010930243)	tcfA
VFG000011(gb_WP_010931648)	ptxA
VFG000012(gb_WP_010931649)	ptxB
VFG000013(gb_WP_010929491)	ptxD
VFG000014(gb_WP_023853616)	ptxE
VFG000015(gb_WP_010931651)	ptxC
VFG000025(gb_WP_010929995)	cyaA
VFG000026(gb_WP_010931478)	dnt
VFG000027(gb_WP_010931506)	brkA
VFG000028(gb_WP_003808614)	brkB
VFG000029(gb_WP_010929608)	bplL
VFG000030(gb_WP_003807102)	bplI
VFG000031(gb_WP_010929609)	bplH
VFG000032(gb_WP_010929610)	bplG
VFG000033(gb_WP_010929611)	bplF
VFG000034(gb_WP_010929612)	bplE
VFG000035(gb_WP_010929613)	bplD
VFG000036(gb_WP_010929614)	bplC
VFG000037(gb_WP_003807114)	bplB
VFG000038(gb_WP_003807115)	bplA
VFG000039(gb_WP_010930813)	bscC
VFG000040(gb_WP_010930814)	bscW
VFG000041(gb_WP_010930815)	bscU
VFG000042(gb_WP_010930816)	bscT
VFG000043(gb_WP_010930817)	bscS
VFG000044(gb_WP_004568087)	bscR
VFG000045(gb_WP_010930818)	bscQ
VFG000046(gb_WP_010930819)	bscP
VFG000047(gb_WP_003820063)	bscO
VFG000048(gb_WP_003820061)	bscN
VFG000049(gb_WP_010930820)	bscL
VFG000050(gb_WP_003820059)	bscK
VFG000051(gb_WP_010930821)	bscJ
VFG000052(gb_WP_010930822)	bscI
VFG000053(gb_WP_010930823)	bcr4
VFG000054(gb_WP_003809889)	bcrH2
VFG000055(gb_WP_010930824)	bopB
VFG000056(gb_WP_010930825)	bopD
VFG000057(gb_WP_004568102)	bcrH1
VFG000058(gb_WP_010930826)	btc22
VFG000059(gb_WP_003820049)	bsp22
VFG000060(gb_WP_010930827)	bopN
VFG000061(gb_WP_010930828)	orf4
VFG000062(gb_WP_010930829)	bscX
VFG000063(gb_WP_010930830)	bscY
VFG000064(gb_WP_010930831)	bcrD
VFG000065(gb_WP_010930832)	bscD
VFG000066(gb_WP_003820040)	bscE
VFG000067(gb_WP_003809869)	bscF
VFG000158(gb_WP_010929994)	cyaC
VFG001269(gb_WP_010929996)	cyaB
VFG001270(gb_WP_010929997)	cyaD
VFG001271(gb_WP_010929998)	cyaE
VFG001272(gb_WP_010930614)	fhaC
VFG002044(gb_WP_010930609)	bvgA
VFG002045(gb_WP_010930608)	bvgS
VFG011072(gb_WP_003809919)	btrS
VFG011087(gb_WP_010929841)	bopC/bteA
VFG042069(gb_WP_010930811)	BP_RS11160
VFG042070(gb_WP_010930812)	btrU/bspR
VFG042071(gb_WP_010930810)	BP_RS11155
VFG042072(gb_WP_010930809)	BP_RS11150
VFG042075(gb_WP_003814626)	btcA
VFG002208(gb_WP_004681227)	virB1
VFG002209(gb_WP_002967165)	virB2
VFG002210(gb_WP_002966512)	virB3
VFG002211(gb_WP_004681223)	virB4
VFG002212(gb_WP_002966514)	virB5
VFG002213(gb_WP_004686828)	virB6
VFG002214(gb_WP_002966516)	virB7
VFG002215(gb_WP_002966517)	virB8
VFG002216(gb_WP_041594649)	virB9
VFG002217(gb_WP_041594650)	virB10
VFG002218(gb_WP_005972055)	virB11
VFG002219(gb_WP_011005413)	cgs
VFG002220(gb_WP_004686741)	pgm
VFG002221(gb_WP_002963690)	manAoAg
VFG002222(gb_WP_004683228)	manCoAg
VFG002223(gb_WP_004686778)	pmm
VFG002224(gb_WP_002963682)	wbkA
VFG002225(gb_WP_002963680)	gmd
VFG002226(gb_WP_002963679)	per
VFG002227(gb_WP_004683211)	wzm
VFG002228(gb_WP_002963677)	wzt
VFG002229(gb_WP_002963676)	wbkB
VFG002230(gb_WP_002963675)	wbkC
VFG011389(gb_WP_004684016)	lpxC
VFG011394(gb_WP_002964281)	lpxD
VFG011399(gb_WP_004683864)	fabZ
VFG011404(gb_WP_002964279)	lpxA
VFG011409(gb_WP_002964277)	lpxB
VFG011414(gb_WP_002964262)	kdsA
VFG011419(gb_WP_004683664)	htrB
VFG011424(gb_WP_002971781)	kdsB
VFG011429(gb_WP_002963985)	acpXL
VFG011430(gb_WP_002963616)	acpXL
VFG011439(gb_WP_004685554)	lpxE
VFG011444(gb_WP_002966810)	wboA
VFG011453(gb_WP_002969456)	wbpZ
VFG011505(gb_WP_004683330)	lpsA
VFG011510(gb_WP_002964609)	lpsB/lpcC
VFG011515(gb_WP_004683743)	wbdA
VFG011519(gb_WP_002963669)	wbpL
VFG011524(gb_WP_002966241)	manBcore
VFG011528(gb_WP_004681680)	manCcore
VFG011533(gb_WP_002966366)	lpxK
VFG011535(gb_WP_004681469)	waaA/kdtA
VFG011626(gb_WP_002965156)	bvrR
VFG011631(gb_WP_004684547)	bvrS
VFG041369(gb_WP_004681215)	virB12
VFG041431(gb_WP_002964730)	vceA
VFG041432(gb_WP_004683775)	vceC
VFG045340(gb_WP_002964382)	ricA
VFG045465(gb_WP_004684737)	btpA
VFG045466(gb_WP_002963876)	btpB
VFG051113(gb_WP_080515433.1)	bigA
VFG051120(gb_WP_004684498.1)	bigB
VFG051123(gb_WP_032449063.1)	bmaA
VFG051125(gb_WP_004684499.1)	bmaB/omaA
VFG051131(gb_WP_006191504.1)	bmaC
VFG051134(gb_WP_002969669.1)	btaE
VFG051142(gb_WP_006278782.1)	btaF
VFG051149(gb_WP_002966733.1)	bspA
VFG051158(gb_WP_004683443.1)	bspB
VFG051167(gb_WP_002963960.1)	bspC
VFG051176(gb_WP_002964749.1)	bspE
VFG051185(gb_WP_004684470.1)	bspF
VFG051202(gb_WP_004684061.1)	bspL
VFG051235(gb_WP_002965067.1)	BPE005
VFG051244(gb_WP_004683766.1)	BPE043
VFG051253(gb_WP_004681330.1)	BPE123
VFG051262(gb_WP_002964379.1)	BPE275
VFG051271(gb_WP_004684041.1)	sepA
VFG002424(gb_WP_011205626)	bimA
VFG002425(gb_WP_004526211)	pilA
VFG002426(gb_WP_004194352)	pilB
VFG002427(gb_WP_004549962)	pilC
VFG002428(gb_WP_004194127)	pilD
VFG002429(gb_WP_004548643)	pilV
VFG002430(gb_WP_004530613)	pilS
VFG002431(gb_WP_004187516)	pilR
VFG002432(gb_WP_004537540)	pilQ
VFG002433(gb_WP_004187526)	pilO
VFG002434(gb_WP_011205650)	pilN
VFG002435(gb_WP_004556283)	pilT
VFG002436(gb_WP_080341181)	boaA
VFG002437(gb_WP_011325557)	boaB
VFG002438(gb_WP_011205635)	bprC
VFG002439(gb_WP_004203128)	bprD
VFG002440(gb_WP_011204593)	bprB
VFG002441(gb_WP_004187648)	bicP
VFG002442(gb_WP_004528810)	bopA
VFG002443(gb_WP_004528812)	bopE
VFG002444(gb_WP_004188424)	bapC
VFG002445(gb_WP_004525324)	bapB
VFG002446(gb_WP_011205636)	bapA
VFG002447(gb_WP_004188590)	bipD
VFG002448(gb_WP_004187356)	bprA
VFG002449(gb_WP_004203135)	bipC
VFG002450(gb_WP_004533397)	bipB
VFG002451(gb_WP_004188618)	bicA
VFG002452(gb_WP_004525318)	bsaZ
VFG002453(gb_WP_011205637)	bsaY
VFG002454(gb_WP_004187417)	bsaX
VFG002455(gb_WP_004188067)	spaP
VFG002456(gb_WP_004530590)	bsaV
VFG002457(gb_WP_011205638)	bsaU
VFG002458(gb_WP_004525314)	bsaT
VFG002459(gb_WP_004525313)	bsaS
VFG002460(gb_WP_004187509)	bsaR
VFG002461(gb_WP_004188490)	bsaQ
VFG002462(gb_WP_004555023)	bsaP
VFG002463(gb_WP_011205639)	bsaO
VFG002464(gb_WP_011205640)	bsaN
VFG002465(gb_WP_009940818)	bsaM
VFG002466(gb_WP_004528826)	bsaL
VFG002467(gb_WP_004525308)	bsaK
VFG002468(gb_WP_004530593)	basJ
VFG002469(gb_WP_004533227)	orgA
VFG002470(gb_WP_004533272)	orgB
VFG002471(gb_WP_004533443)	bprP
VFG002472(gb_WP_004198142)	bprQ
VFG002473(gb_WP_004533180)	bopC
VFG002474(gb_WP_004530571)	tssB-5
VFG002475(gb_WP_004200974)	tssC-5
VFG002476(gb_WP_004525344)	tssD-5
VFG002477(gb_WP_004530572)	tssE-5
VFG002478(gb_WP_004551874)	tssF-5
VFG002479(gb_WP_004533373)	tssG-5
VFG002480(gb_WP_011205629)	tssH-5/clpV
VFG002481(gb_WP_009940775)	vgrG-5
VFG002482(gb_WP_011205630)	tagAB-5
VFG002483(gb_WP_004556233)	tagB-5
VFG002484(gb_WP_004551877)	tagC-5
VFG002485(gb_WP_004200966)	tagD-5
VFG002486(gb_WP_004533362)	tssJ-5
VFG002487(gb_WP_004536933)	tssK-5
VFG002488(gb_WP_004551879)	tssL-5
VFG002489(gb_WP_181937968)	tssM-5
VFG002490(gb_WP_004196785)	fliL
VFG002491(gb_WP_004524547)	fliM
VFG002492(gb_WP_004184995)	fliN
VFG002493(gb_WP_045606430)	fliO
VFG002494(gb_WP_011204732)	fliP
VFG002495(gb_WP_004199882)	fliQ
VFG002496(gb_WP_004525780)	fliR
VFG002497(gb_WP_011204776)	fliK
VFG002498(gb_WP_004197162)	fliJ
VFG002499(gb_WP_004197164)	fliI
VFG002500(gb_WP_004556525)	fliH
VFG002501(gb_WP_004197167)	fliG
VFG002502(gb_WP_004523066)	fliF
VFG002503(gb_WP_004534368)	fliE
VFG002504(gb_WP_004203429)	fliS
VFG002505(gb_WP_162486660)	flgN
VFG002506(gb_WP_004200257)	flgM
VFG002507(gb_WP_004534277)	flgA
VFG002508(gb_WP_004525899)	flgB
VFG002509(gb_WP_004197251)	flgC
VFG002510(gb_WP_011204781)	flgD
VFG002511(gb_WP_004197255)	flgE
VFG002512(gb_WP_004185014)	flgF
VFG002513(gb_WP_004197257)	flgG
VFG002514(gb_WP_004523041)	flgH
VFG002515(gb_WP_004550967)	flgI
VFG002516(gb_WP_004197262)	flgJ
VFG002517(gb_WP_004203463)	flgK
VFG002518(gb_WP_004200262)	flgL
VFG002519(gb_WP_004198636)	fliA
VFG002520(gb_WP_004198637)	flhG
VFG002521(gb_WP_004525693)	flhF
VFG002522(gb_WP_004198639)	flhA
VFG002523(gb_WP_004198640)	flhB
VFG002524(gb_WP_004524402)	cheZ
VFG002525(gb_WP_004185006)	cheY
VFG002526(gb_WP_004198645)	cheB
VFG002527(gb_WP_004524404)	cheD
VFG002528(gb_WP_004525698)	cheR
VFG002529(gb_WP_011205290)	tsr
VFG002530(gb_WP_004199265)	cheW
VFG002531(gb_WP_011205291)	cheA
VFG002532(gb_WP_004198195)	cheY1
VFG002533(gb_WP_009938926)	motB
VFG002534(gb_WP_004198197)	motA
VFG002535(gb_WP_004198207)	fliC
VFG002536(gb_WP_004530401)	fliD
VFG002537(gb_WP_004523992)	pmlI/bspI1
VFG002538(gb_WP_004184923)	pmlR/bspR1
VFG002539(gb_WP_004528416)	bspI2
VFG002540(gb_WP_004558040)	bspR2
VFG002541(gb_WP_004528852)	bspI3
VFG002542(gb_WP_004188690)	bspR3
VFG002543(gb_WP_011205386)	bspR4
VFG002544(gb_WP_004532123)	bspR5
VFG002545(gb_WP_004194345)	BPSL2786
VFG002546(gb_WP_004194209)	wcbT
VFG002547(gb_WP_004527661)	wcbS
VFG002548(gb_WP_004550042)	wcbR
VFG002549(gb_WP_004527663)	wcbQ
VFG002550(gb_WP_009938563)	wcbP
VFG002551(gb_WP_004522170)	wcbO
VFG002552(gb_WP_004194255)	wcbN
VFG002553(gb_WP_004194086)	wcbM
VFG002554(gb_WP_011205222)	gmhA
VFG002555(gb_WP_004194045)	wcbL
VFG002556(gb_WP_004194087)	wcbK
VFG002557(gb_WP_004194206)	wcbJ
VFG002558(gb_WP_004550035)	wcbI
VFG002559(gb_WP_004194348)	wcbH
VFG002560(gb_WP_004546402)	wcbG
VFG002561(gb_WP_004550031)	wcbF
VFG002562(gb_WP_004522161)	wcbE
VFG002563(gb_WP_004194035)	wzt2
VFG002564(gb_WP_004194135)	wzm
VFG002565(gb_WP_004196469)	wcbD
VFG002566(gb_WP_004194378)	wcbC
VFG002567(gb_WP_009938575)	wcbB
VFG002568(gb_WP_011205226)	wcbA
VFG002569(gb_WP_004522157)	manC
VFG041118(gb_WP_045606108)	tssA-5
VFG041119(gb_WP_004528788)	BPS_RS26875
VFG041120(gb_WP_011205628)	BPS_RS26880
VFG041780(gb_WP_009934508)	chbp
VFG042964(gb_WP_004188293)	pilM
VFG042965(gb_WP_004188396)	pilP
VFG042966(gb_WP_004536546)	pilL
VFG045467(gb_WP_011204972)	cdpA
VFG001890(gb_YP_002343513)	flgD
VFG001891(gb_YP_002343514)	flgE
VFG001892(gb_YP_002343523)	fliY
VFG001893(gb_YP_002343524)	fliM
VFG001894(gb_YP_002343525)	fliA
VFG001895(gb_YP_002343528)	flhF
VFG001896(gb_YP_002343653)	fliI
VFG001897(gb_YP_002343756)	fliF
VFG001898(gb_YP_002343757)	fliG
VFG001899(gb_YP_002343758)	fliH
VFG001900(gb_YP_002343773)	flhB
VFG001901(gb_YP_002343774)	motB
VFG001902(gb_YP_002343775)	motA
VFG001903(gb_YP_002343789)	fliN
VFG001904(gb_YP_002343808)	Cj0371
VFG001905(gb_YP_002343957)	fliE
VFG001906(gb_YP_002343958)	flgC
VFG001907(gb_YP_002343959)	flgB
VFG001908(gb_YP_002343978)	flaG
VFG001909(gb_YP_002343979)	fliD
VFG001910(gb_YP_002343980)	fliS
VFG001911(gb_YP_002344105)	flgH
VFG001912(gb_YP_002344115)	flgG2
VFG001913(gb_YP_002344116)	flgG
VFG001914(gb_YP_002344138)	flaC
VFG001915(gb_YP_002344227)	fliP
VFG001916(gb_YP_002344282)	flhA
VFG001917(gb_YP_002344286)	flgL
VFG001918(gb_YP_002344570)	fliR
VFG001919(gb_YP_002344702)	pseG
VFG001920(gb_YP_002344703)	pseH
VFG001921(gb_YP_002344720)	ptmB
VFG001922(gb_YP_002344721)	ptmA
VFG001923(gb_YP_002344726)	flaB
VFG001924(gb_YP_002344727)	flaA
VFG001925(gb_YP_002344791)	fliL
VFG001926(gb_YP_002344844)	flgI
VFG001927(gb_YP_002344848)	flgK
VFG001928(gb_YP_002344934)	pflA
VFG001929(gb_YP_002345043)	fliQ
VFG001930(gb_YP_002345095)	flgE2
VFG001931(gb_YP_002344858)	cadF
VFG001932(gb_YP_002343539)	cdtC
VFG001933(gb_YP_002343540)	cdtB
VFG001934(gb_YP_002343541)	cdtA
VFG001935(gb_YP_002344312)	ciaB
VFG001936(gb_YP_002344528)	Cj1135
VFG001937(gb_YP_002344529)	Cj1136
VFG001938(gb_YP_002344530)	Cj1137c
VFG001939(gb_YP_002344531)	Cj1138
VFG001940(gb_YP_002344532)	wlaN
VFG001941(gb_YP_002344533)	cstIII
VFG001942(gb_YP_002344534)	neuB1
VFG001943(gb_YP_002344535)	neuC1
VFG001944(gb_YP_002344536)	neuA1
VFG001945(gb_YP_002344537)	Cj1145c
VFG001947(gb_YP_002344538)	waaV
VFG001948(gb_YP_002344539)	waaF
VFG001949(gb_YP_002344804)	Cj1421c
VFG001950(gb_YP_002344805)	Cj1422c
VFG001951(gb_YP_002344806)	hddC
VFG001952(gb_YP_002344807)	gmhA2
VFG001953(gb_YP_002344808)	hddA
VFG001954(gb_YP_002344809)	Cj1426c
VFG001955(gb_YP_002344810)	Cj1427c
VFG001956(gb_YP_002344811)	fcl
VFG001957(gb_YP_002344812)	Cj1429c
VFG001958(gb_YP_002344813)	rfbC
VFG001959(gb_YP_002344814)	hddC
VFG001960(gb_YP_002344815)	Cj1432c
VFG001961(gb_YP_002344816)	Cj1433c
VFG001962(gb_YP_002344817)	Cj1434c
VFG001963(gb_YP_002344818)	Cj1435c
VFG001964(gb_YP_002344819)	Cj1436c
VFG001965(gb_YP_002344820)	Cj1437c
VFG001966(gb_YP_002344821)	Cj1438c
VFG001967(gb_YP_002344822)	glf
VFG001968(gb_YP_002344823)	Cj1440c
VFG001969(gb_YP_002344824)	kfiD
VFG001970(gb_YP_002344825)	Cj1442c
VFG001971(gb_YP_002344826)	kpsF
VFG001972(gb_YP_002344827)	kpsD
VFG001973(gb_YP_002344828)	kpsE
VFG001974(gb_YP_002344829)	kpsT
VFG001975(gb_YP_002344830)	kpsM
VFG001976(gb_WP_011117548)	virB8
VFG001977(gb_WP_011117549)	virB9
VFG001978(gb_WP_011117550)	virB10
VFG001980(gb_WP_011117553)	virD4
VFG001983(gb_YP_002344319)	pebA
VFG001984(gb_YP_002344378)	jlpA
VFG001985(gb_YP_002344650)	porA
VFG001986(gb_YP_002344796)	kpsS
VFG001987(gb_YP_002344797)	kpsC
VFG001988(gb_YP_002344798)	cysC
VFG001989(gb_YP_002344799)	Cj1416c
VFG002024(gb_YP_002344526)	waaC
VFG002025(gb_YP_002344527)	htrB
VFG002026(gb_YP_002344540)	gmhA
VFG002027(gb_YP_002344541)	hldE
VFG002028(gb_YP_002344542)	hldD
VFG011668(gb_YP_002344800)	Cj1417c
VFG011671(gb_YP_002344801)	Cj1418c
VFG011674(gb_YP_002344802)	Cj1419c
VFG011677(gb_YP_002344803)	Cj1420c
VFG011757(gb_WP_011117594)	virB4
VFG011823(gb_YP_002344543)	gmhB
VFG011826(gb_YP_002343512)	fliK
VFG011850(gb_YP_002343527)	flhG
VFG011938(gb_YP_002344283)	Cj0883c
VFG011946(gb_YP_002344419)	flgR
VFG012002(gb_YP_002344683)	pseB
VFG012006(gb_YP_002344684)	pseC
VFG012009(gb_YP_002344701)	pseF
VFG012019(gb_YP_002344706)	pseA
VFG012022(gb_YP_002344707)	pseI
VFG012033(gb_YP_002344722)	pseD/maf2
VFG012036(gb_YP_002344725)	pseE/maf5
VFG043392(gb_YP_002343698)	eptC
VFG043393(gb_YP_002343724)	cheW
VFG043394(gb_YP_002343725)	cheA
VFG043395(gb_YP_002343726)	cheV
VFG043396(gb_YP_002344093)	rpoN
VFG043397(gb_YP_002344176)	flgA
VFG043398(gb_YP_002344200)	flgS
VFG043399(gb_YP_002344420)	flgQ
VFG043400(gb_YP_002344421)	flgP
VFG043401(gb_YP_002344468)	fliW
VFG043402(gb_YP_002344511)	cheY
VFG043403(gb_YP_002344724)	maf4
VFG043404(gb_YP_002344845)	flgJ
VFG043405(gb_YP_002344846)	flgM
VFG043472(gb_YP_002344670)	Cj1279c
VFG045341(gb_YP_002344633)	ciaC
VFG002124(gb_NP_219591)	scc1
VFG002125(gb_NP_219592)	copN
VFG002126(gb_NP_219593)	cdsV
VFG002127(gb_NP_219594)	cdsU
VFG002128(gb_NP_220074)	cdsJ
VFG002129(gb_NP_220075)	CT_560
VFG002130(gb_NP_220076)	cdsL
VFG002131(gb_NP_220077)	cdsR
VFG002132(gb_NP_220078)	cdsS
VFG002133(gb_NP_220079)	cdsT
VFG002134(gb_NP_220091)	scc2
VFG002135(gb_NP_220092)	CT_577
VFG002136(gb_NP_220093)	copB
VFG002137(gb_NP_220094)	copD
VFG002138(gb_NP_220182)	scc4
VFG002139(gb_NP_220183)	cdsD
VFG002140(gb_NP_220184)	cdsE
VFG002141(gb_NP_220185)	cdsF
VFG002142(gb_NP_220186)	cdsG
VFG002143(gb_NP_220187)	CT_668
VFG002144(gb_NP_220188)	cdsN
VFG002145(gb_NP_220189)	cdsO
VFG002146(gb_NP_220190)	cdsP
VFG002147(gb_NP_220191)	cdsQ
VFG002148(gb_NP_220192)	pkn5
VFG002149(gb_NP_220193)	cdsC
VFG002150(gb_NP_220382)	copD2
VFG002151(gb_NP_220383)	copB2
VFG002152(gb_NP_220384)	scc3
VFG002153(gb_NP_220385)	CT_863
VFG002154(gb_NP_219969)	tarp
VFG016998(gb_NP_220368)	CT_847
VFG017038(gb_NP_219622)	incA
VFG017049(gb_NP_219737)	incB
VFG017059(gb_NP_219738)	incC
VFG042183(gb_NP_220333)	inaC
VFG042184(gb_NP_220238)	filF
VFG042185(gb_NP_220236)	filI
VFG042186(gb_NP_220237)	CT_718
VFG042187(gb_NP_220213)	tmeA
VFG042196(gb_NP_220127)	cadD
VFG042197(gb_NP_220138)	CT_621
VFG042200(gb_NP_219734)	cpoS
VFG042201(gb_NP_219619)	incE
VFG042202(gb_NP_219563)	flhA
VFG042203(gb_NP_219564)	CT_061
VFG043572(gb_NP_219955)	omcB
VFG043574(gb_NP_220200)	ompA
VFG044455(gb_NP_219546)	slc1
VFG044456(gb_NP_219765)	mcsc
VFG044457(gb_NP_219779)	CT274
VFG044458(gb_NP_220099)	CT_584
VFG044459(gb_NP_220139)	CT_622
VFG049554(gb_NP_219908)	cdsZ
VFG049610(gb_NP_219618)	incD
VFG049619(gb_NP_219621)	incG
VFG049624(gb_NP_219733)	CT_228
VFG049637(gb_NP_220372)	CT_850
VFG049649(gb_NP_220256)	NUE
VFG049661(gb_NP_219502)	tepP
VFG049666(gb_NP_219585)	CT_082
VFG049684(gb_NP_220380)	CT_858
VFG050220(gb_NP_219507)	incV
VFG050221(gb_NP_219508)	CT_006
VFG050222(gb_NP_219545)	glgX
VFG050223(gb_NP_219556)	CT_053
VFG050224(gb_NP_219586)	CT_083
VFG050225(gb_NP_219604)	mrcA
VFG050226(gb_NP_219608)	cteG
VFG050227(gb_NP_219620)	CT_117
VFG050228(gb_NP_219637)	CT_134
VFG050229(gb_NP_219638)	CT_135
VFG050230(gb_NP_219645)	CT_142
VFG050231(gb_NP_219646)	CT_143
VFG050232(gb_NP_219647)	CT_144
VFG050233(gb_NP_219650)	CT_147
VFG050234(gb_NP_219659)	CT_156
VFG050235(gb_NP_219664)	CT_161
VFG050236(gb_NP_219666)	CT_163
VFG050237(gb_NP_219683)	CT_179
VFG050238(gb_NP_219696)	CT_192
VFG050239(gb_NP_219707)	CT_203
VFG050240(gb_AAC67814)	CT_222
VFG050241(gb_NP_219728)	IPAM
VFG050242(gb_NP_219729)	CT_224
VFG050243(gb_NP_219730)	CT_225
VFG050244(gb_NP_219731)	CT_226
VFG050245(gb_NP_219732)	CT_227
VFG050246(gb_NP_219754)	CT_249
VFG050247(gb_NP_219793)	CT_288
VFG050248(gb_NP_219852)	CT_345
VFG050249(gb_NP_219867)	CT_358
VFG050250(gb_NP_219893)	CT_383
VFG050251(gb_NP_219941)	CT_429
VFG050252(gb_NP_219952)	CT_440
VFG050253(gb_NP_219954)	crpA
VFG050254(gb_NP_219962)	CT_449
VFG050255(gb_NP_219986)	CT_473
VFG050256(gb_NP_219997)	CT_483
VFG050257(gb_NP_220044)	CT_529
VFG050258(gb_NP_220065)	CT_550
VFG050259(gb_NP_220080)	CT_565
VFG050260(gb_NP_220123)	CT_606.1
VFG050261(gb_NP_220135)	CT_618
VFG050262(gb_NP_220136)	CT_619
VFG050263(gb_NP_220137)	CT_620
VFG050264(gb_NP_220171)	CT_652.1
VFG050265(gb_NP_220175)	CT_656
VFG050266(gb_NP_220214)	CT_695
VFG050267(gb_NP_220230)	CT_711
VFG050268(gb_NP_220231)	CT_712
VFG050269(gb_NP_220257)	yycJ
VFG050270(gb_NP_220318)	glgA
VFG050271(gb_NP_220369)	CT_848
VFG050272(gb_NP_220370)	CT_849
VFG051291(gb_NP_219922.1)	pmpA
VFG051303(gb_NP_219923.1)	pmpB
VFG051314(gb_NP_219924.1)	pmpC
VFG051319(gb_NP_220332.1)	pmpD
VFG051330(gb_NP_220391.1)	pmpE
VFG051360(gb_NP_220392.1)	pmpF
VFG051368(gb_NP_220393.1)	pmpG
VFG051435(gb_NP_220394.1)	pmpH
VFG051447(gb_NP_220396.1)	pmpI
VFG051474(gb_NP_219519.1)	ctad1
VFG002274(gb_WP_011009584)	plc
VFG002275(gb_WP_003467630)	pfoA
VFG002276(gb_WP_011009653)	colA
VFG002277(gb_WP_011009663)	nagH
VFG002278(gb_WP_011010095)	nagI
VFG002279(gb_WP_003467250)	nagJ
VFG002280(gb_WP_011010361)	nagK
VFG002281(gb_WP_003468301)	nagL
VFG002282(gb_WP_041707714)	cloSI
VFG002285(gb_WP_011590492)	nanH
VFG002286(gb_WP_003470007)	cpe
VFG002287(gb_WP_011860904)	toxA
VFG002288(gb_WP_009902069)	toxB
VFG002289(gb_WP_011100836)	tetX
VFG002290(gb_WP_004456321)	cpb
VFG002291(gb_WP_003458888)	ext
VFG002292(gb_CAA51959)	iap
VFG002293(gb_CAA51960)	ibp
VFG002296(gb_CAA41768)	C3bot1
VFG002300(gb_CAA88565)	tcnA
VFG012088(gb_WP_011861686)	slpA
VFG012089(gb_WP_011861682)	cwp66
VFG012095(gb_WP_003435012)	groEL
VFG012104(gb_WP_011861612)	fbpA/fbp68
VFG012114(gb_WP_004454925)	cdtA
VFG012122(gb_WP_010968250)	cpb2
VFG012160(gb_WP_011590331)	nanI
VFG012162(gb_WP_011590241)	nanJ
VFG012191(gb_WP_011948511)	bont
VFG019178(gb_WP_012291519)	bont
VFG019180(gb_WP_011987710)	bont
VFG043656(gb_WP_003377818)	C2I
VFG043666(gb_CAA60674)	C3lim
VFG043773(gb_YP_398516)	bont
VFG043774(gb_AAB24244)	bont
VFG043775(gb_BAB86845)	bont
VFG043778(gb_CAA52275)	bont
VFG044015(gb_ACN73257)	netB
VFG044024(gb_ACA60977)	ACA60977
VFG044025(gb_WP_012669495)	C2II
VFG050212(gb_WP_011861707)	CD2831
VFG050213(gb_WP_011861889)	CD3246
VFG050214(gb_WP_011860844)	cwpV
VFG050215(gb_WP_011861680)	cwp84
VFG050216(gb_WP_011861847)	cbpA
VFG050217(gb_WP_011860976)	CD0873
VFG050218(gb_WP_011861706)	zmp1
VFG051287(gb_WP_003366488.1)	C3bot2
VFG002198(gb_WP_003850266)	tox
VFG002199(gb_WP_010935501)	spaC
VFG002200(gb_WP_010935502)	spaB
VFG002201(gb_WP_010935504)	spaA
VFG013668(gb_WP_010935503)	srtA
VFG050289(gb_WP_010934515)	DIP_RS14950
VFG050290(gb_WP_010934947)	DIP_RS17590
VFG050291(gb_WP_014302131)	DIP_RS19245
VFG050292(gb_WP_010935564)	DIP_RS23695
VFG050293(gb_WP_010935399)	DIP_RS20575
VFG039101(gb_NP_819363)	icmH/dotU
VFG039106(gb_NP_820604)	icmB/dotO
VFG039111(gb_NP_820605)	icmJ/dotN
VFG039116(gb_NP_820606)	icmD/dotP
VFG039121(gb_NP_820607)	icmC/dotE
VFG039126(gb_NP_820608)	icmG/dotF
VFG039131(gb_NP_820609)	icmE/dotG
VFG039136(gb_NP_820610)	icmK/dotH
VFG039141(gb_NP_820611)	icmL.1/dotI
VFG039146(gb_NP_820612)	icmL.2/dotI
VFG039151(gb_NP_820613)	icmN/dotK
VFG039156(gb_NP_820614)	icmO/dotL
VFG039161(gb_NP_820615)	icmP/dotM
VFG039166(gb_NP_820616)	icmQ
VFG039171(gb_YP_002333017)	coxigA/icmR
VFG039176(gb_NP_820623)	icmT
VFG039181(gb_NP_820624)	icmS
VFG039186(gb_NP_820625)	dotD
VFG039191(gb_NP_820626)	dotC
VFG039196(gb_NP_820627)	dotB
VFG039201(gb_NP_820630)	dotA
VFG039206(gb_NP_820631)	icmV
VFG039211(gb_NP_820632)	icmW
VFG039216(gb_NP_820634)	icmX
VFG039226(gb_NP_819077)	cetCb1
VFG039231(gb_NP_819096)	cirA/coxCC1
VFG039236(gb_NP_819115)	cem1
VFG039240(gb_NP_819125)	ankA
VFG039245(gb_NP_819130)	mceA
VFG039255(gb_NP_819163)	CBU_0113
VFG039269(gb_NP_819221)	coxK1
VFG039274(gb_NP_819247)	CBU_0201
VFG039282(gb_NP_819314)	CBU_0270
VFG039287(gb_NP_819338)	CBU_0295
VFG039302(gb_NP_819412)	CBU_0372
VFG039311(gb_NP_819427)	cetCb2
VFG039316(gb_NP_819448)	coxCC3
VFG039326(gb_NP_819463)	cirB
VFG039331(gb_NP_819484)	ankF
VFG039336(gb_NP_819504)	CBU_0469
VFG039341(gb_NP_819545)	CBU_0513
VFG039345(gb_NP_819620)	CBU_0590
VFG039351(gb_NP_819656)	cetCb3
VFG039356(gb_NP_819665)	CBU_0635
VFG039361(gb_NP_819667)	CBU_0637
VFG039366(gb_NP_819695)	cvpA
VFG039371(gb_NP_819795)	phnB
VFG039376(gb_NP_819802)	ankG
VFG039381(gb_NP_819814)	coxCC4
VFG039386(gb_NP_819821)	coxH2/rimL
VFG039395(gb_NP_819899)	coxCC5
VFG039400(gb_NP_819902)	cetCB4
VFG039405(gb_NP_819950)	cirC/coxDFB1
VFG039410(gb_NP_819986)	cem3
VFG039425(gb_NP_820063)	cem4
VFG039430(gb_NP_820078)	CBU_1079
VFG039446(gb_NP_820193)	CBU_1198
VFG039449(gb_NP_820208)	ankI
VFG039454(gb_NP_820212)	coxU2
VFG039459(gb_NP_820305)	coxCC6
VFG039464(gb_NP_820359)	CBU_1370
VFG039474(gb_NP_820376)	cem6
VFG039481(gb_NP_820393)	CBU_1409
VFG039486(gb_NP_820409)	coxDFB4
VFG039491(gb_NP_820417)	CBU_1434
VFG039496(gb_NP_820440)	coxTPR1
VFG039501(gb_NP_820443)	coxCC7/cig44
VFG039526(gb_NP_820526)	coxCC10/cig49
VFG039531(gb_NP_820539)	coxCC11
VFG039536(gb_NP_820549)	CBU_1566
VFG039541(gb_NP_820552)	coxCC12
VFG039545(gb_NP_820559)	CBU_1576
VFG039549(gb_NP_820577)	CBU_1594
VFG039558(gb_NP_820589)	CBU_1607
VFG039563(gb_NP_820618)	coxCC14
VFG039568(gb_NP_820621)	CBU_1639
VFG039572(gb_NP_820647)	CBU_1665
VFG039575(gb_NP_820658)	cem9
VFG039580(gb_NP_820659)	CBU_1677
VFG039585(gb_NP_820667)	CBU_1685
VFG039590(gb_NP_820668)	cetCb5
VFG039595(gb_NP_820705)	cetCb6
VFG039600(gb_NP_820731)	coxDFB5/cig57
VFG039605(gb_NP_820734)	CBU_1754
VFG039615(gb_NP_820749)	coxH3
VFG039623(gb_NP_820769)	CBU_1789
VFG039626(gb_NP_820770)	CBU_1790
VFG039631(gb_NP_820773)	CBU_1794
VFG039636(gb_NP_820797)	CBU_1818
VFG039641(gb_NP_820802)	coxH4/cig61
VFG039646(gb_NP_820804)	coxDFB6
VFG039656(gb_NP_820982)	cem12
VFG039661(gb_NP_820988)	cem13
VFG039666(gb_NP_820990)	CBU_2016
VFG039671(gb_NP_821001)	CBU_2028
VFG039676(gb_NP_821023)	coxCC15
VFG039681(gb_NP_821027)	CBU_2056
VFG039691(gb_NP_821046)	CBU_2076
VFG039696(gb_NP_821048)	coxFIC1
VFG039700(gb_NP_819024)	cpeA
VFG039704(gb_NP_819030)	cpeB
VFG039706(gb_NP_819031)	cpeC/coxU3
VFG039708(gb_NP_819032)	cpeD
VFG039710(gb_NP_819033)	cpeE
VFG039714(gb_NP_819040)	cpeF
VFG039716(gb_NP_819042)	cpeG
VFG039719(gb_NP_819050)	cpeH
VFG041423(gb_WP_158300522)	CBUD_RS12405
VFG041424(gb_WP_005768624)	CBUD_RS05145
VFG041425(gb_WP_011996917)	CBUD_RS11275
VFG041426(gb_WP_005772782)	CBUD_RS06720
VFG041427(gb_WP_143343646)	CBUD_RS08635
VFG041429(gb_WP_005771199)	CBUK_RS06760
VFG041433(gb_WP_012569786)	CBUG_RS02435
VFG046157(gb_NP_819172)	CBU_0122
VFG046162(gb_NP_819229)	CBU_0183
VFG046166(gb_NP_819566)	CBU_0534
VFG046177(gb_NP_820262)	CBU_1268
VFG046182(gb_NP_820338)	CBU_1349
VFG046187(gb_NP_820476)	CBU_1493
VFG046194(gb_NP_820513)	CBU_1530
VFG046196(gb_NP_820596)	CBU_1614
VFG046201(gb_NP_820732)	CBU_1752
VFG046206(gb_NP_820798)	CBU_1819
VFG046211(gb_NP_820840)	CBU_1863
VFG046214(gb_NP_819037)	CBUA0020
VFG002164(gb_WP_002395058)	prgB/asc10
VFG002165(gb_WP_002356954)	efaA
VFG002166(gb_WP_010714416)	ace
VFG002171(gb_WP_011109430)	EF0149
VFG002172(gb_WP_010710127)	EF0485
VFG002173(gb_WP_010785625)	asa1
VFG002174(gb_WP_002369251)	gelE
VFG002175(gb_AAM75248)	cylR1
VFG002176(gb_AAM75252)	cylB
VFG002177(gb_AAM75253)	cylA
VFG002178(gb_AAM75254)	cylI
VFG002179(gb_AAD09858)	esp
VFG002180(gb_WP_002362627)	cpsK
VFG002181(gb_WP_002387127)	cpsJ
VFG002182(gb_WP_002376666)	cpsI
VFG002183(gb_WP_002387128)	cpsH
VFG002184(gb_WP_002359685)	cpsG
VFG002185(gb_WP_002367100)	cpsF
VFG002186(gb_WP_002387129)	cpsE
VFG002187(gb_WP_002370472)	cpsD
VFG002188(gb_WP_002362618)	cpsC
VFG002189(gb_WP_002359680)	cpsB/cdsA
VFG002190(gb_WP_002362225)	cpsA/uppS
VFG002191(gb_WP_002369252)	sprE
VFG002192(gb_WP_002386893)	fsrC
VFG002193(gb_WP_002369249)	fsrB
VFG002194(gb_WP_011109506)	fsrA
VFG002195(gb_WP_002399773)	EF0818
VFG002196(gb_WP_011109578)	EF3023
VFG002197(gb_WP_002387027)	bopD
VFG042976(gb_WP_154081516)	ebpA
VFG042977(gb_WP_002379309)	ebpB
VFG042978(gb_WP_011109477)	ebpC
VFG042979(gb_WP_002379311)	srtC
VFG043518(gb_AAN12397)	acm
VFG045470(gb_AAM75247)	cylR2
VFG045472(gb_AAM75249)	cylL
VFG045473(gb_AAM75250)	cylS
VFG045474(gb_AAM75251)	cylM
VFG045626(gb_WP_014748741)	scm
VFG045632(gb_WP_002286924)	ecbA/fss3
VFG045635(gb_WP_002296629)	sgrA
VFG000710(gb_AAC38364)	AAC38364
VFG000739(gb_AAC38392)	eae
VFG000750(gb_WP_001261182)	bfpG
VFG000751(gb_WP_000766020)	bfpB
VFG000752(gb_WP_000594644)	bfpC
VFG000755(gb_WP_000660204)	bfpE
VFG000757(gb_WP_001158204)	bfpP
VFG000760(gb_WP_000619594)	bfpJ
VFG000762(gb_WP_000896065)	bfpL
VFG000763(gb_BAA84859)	bfpT
VFG000764(gb_BAA84860)	bfpV
VFG000765(gb_BAA84861)	bfpW
VFG000794(gb_WP_000931693)	espF
VFG000795(gb_WP_000245816)	escG
VFG000796(gb_WP_001053840)	escF
VFG000797(gb_WP_000228583)	cesD2
VFG000799(gb_WP_000935759)	espD
VFG000800(gb_WP_000381516)	espA
VFG000801(gb_WP_001273445)	sepL
VFG000802(gb_WP_000953255)	escD
VFG000803(gb_WP_000627885)	eae
VFG000804(gb_WP_000098793)	cesT
VFG000805(gb_WP_001301454)	tir
VFG000806(gb_WP_000492638)	map
VFG000807(gb_WP_001003065)	cesF
VFG000808(gb_WP_001302249)	espH
VFG000809(gb_WP_000803687)	sepQ/escQ
VFG000810(gb_WP_001303723)	escP
VFG000811(gb_WP_001062956)	escO
VFG000812(gb_WP_000622545)	escN
VFG000813(gb_WP_001037814)	escV
VFG000814(gb_WP_001050992)	cesL
VFG000815(gb_WP_000386949)	sepZ/espZ
VFG000816(gb_WP_001302733)	escI
VFG000817(gb_WP_000716189)	escJ
VFG000818(gb_WP_001063681)	sepD
VFG000819(gb_WP_000723942)	escC
VFG000820(gb_WP_000087467)	cesD
VFG000821(gb_WP_000444180)	glrA
VFG000822(gb_WP_000605370)	glrR
VFG000823(gb_WP_000720639)	etgA
VFG000824(gb_WP_001291694)	escU
VFG000825(gb_WP_001002833)	escT
VFG000826(gb_WP_000379425)	escS
VFG000827(gb_WP_001299599)	escR
VFG000828(gb_WP_000780681)	escL
VFG000829(gb_WP_000151812)	escK
VFG000830(gb_WP_001301632)	cesAB
VFG000831(gb_WP_000628731)	escE
VFG000832(gb_WP_001055728)	ler
VFG000833(gb_WP_001301460)	espG
VFG000834(gb_WP_000823897)	rorf1
VFG000835(gb_WP_000691354)	stx1A
VFG000836(gb_WP_000752026)	stx1B
VFG000837(gb_WP_000649753)	stx2A
VFG000838(gb_WP_000738068)	stx2B
VFG000839(gb_WP_001449026)	paa
VFG000840(gb_WP_000217739)	hlyA
VFG000841(gb_WP_000987091)	hlyB
VFG000842(gb_WP_000839950)	hlyC
VFG000843(gb_WP_001213545)	hlyD
VFG000844(gb_WP_001034100)	espP
VFG000845(gb_WP_000581721)	toxB
VFG000846(gb_WP_001358886)	stcE
VFG000859(gb_CBG37421)	set1A
VFG000860(gb_CBG37420)	set1B
VFG000861(gb_WP_001045649)	pic
VFG000862(gb_WP_014639426)	pet
VFG000871(gb_WP_000790574)	fimB
VFG000872(gb_WP_000044711)	fimE
VFG000873(gb_WP_000695571)	fimA
VFG000874(gb_WP_000824100)	fimI
VFG000875(gb_WP_000066579)	fimC
VFG000876(gb_WP_000120946)	fimD
VFG000877(gb_WP_001244821)	fimF
VFG000878(gb_WP_000872015)	fimG
VFG000879(gb_WP_000832235)	fimH
VFG000880(gb_WP_000006206)	papI
VFG000881(gb_WP_000930062)	papB
VFG000882(gb_WP_000597756)	papA
VFG000883(gb_WP_001239363)	papH
VFG000884(gb_WP_000654937)	papC
VFG000885(gb_WP_000265729)	papD
VFG000886(gb_WP_000261297)	papJ
VFG000887(gb_WP_000597713)	papK
VFG000888(gb_WP_000723799)	papE
VFG000889(gb_WP_000113351)	papF
VFG000890(gb_WP_000758683)	papG
VFG000891(gb_WP_000006208)	papI
VFG000893(gb_WP_021528706)	papA
VFG000901(gb_WP_000758684)	papG
VFG000902(gb_WP_001034089)	sat
VFG000903(gb_WP_001045652)	pic
VFG000905(gb_WP_001546261)	hlyC
VFG000906(gb_WP_001142375)	hlyA
VFG000907(gb_WP_000376545)	hlyB
VFG000908(gb_WP_000860472)	hlyD
VFG000909(gb_WP_000768217)	focA
VFG000910(gb_WP_000703304)	focI
VFG000911(gb_WP_000975445)	focC
VFG000912(gb_WP_001443207)	focD
VFG000913(gb_WP_000237770)	focF
VFG000914(gb_WP_000767894)	focG
VFG000915(gb_WP_001234179)	focH
VFG000916(gb_WP_001017192)	chuS
VFG000917(gb_WP_000089583)	chuA
VFG000918(gb_WP_001312167)	chuT
VFG000919(gb_WP_001095619)	chuW
VFG000920(gb_WP_000020034)	chuX
VFG000921(gb_WP_000189356)	chuY
VFG000922(gb_WP_000910402)	chuU
VFG000923(gb_WP_001034892)	fepA
VFG000924(gb_WP_001234311)	fepB
VFG000925(gb_WP_000140634)	fepC
VFG000926(gb_WP_001443194)	fepD
VFG000927(gb_WP_000096764)	fepE
VFG000928(gb_WP_000640938)	fepG
VFG000929(gb_WP_001375021)	entD
VFG000930(gb_WP_000077767)	entF
VFG000931(gb_WP_001336900)	entC
VFG000932(gb_WP_000026784)	entE
VFG000933(gb_WP_001007140)	entB
VFG000934(gb_WP_000348393)	entA
VFG000935(gb_WP_001222189)	iroN
VFG000936(gb_WP_016265865)	iutA
VFG000937(gb_WP_000750139)	iucD
VFG000938(gb_WP_001015709)	iucC
VFG000939(gb_WP_001287497)	iucB
VFG000940(gb_WP_001299620)	iucA
VFG000942(gb_AAK16475)	draA
VFG000943(gb_AAK16476)	draB
VFG000944(gb_AAK16477)	draC
VFG000945(gb_AAK16478)	draD
VFG000946(gb_AAK16479)	draP
VFG001424(gb_AAB65153)	draE2
VFG001428(gb_AAK16480)	draE
VFG001443(gb_AAF37887)	ompA
VFG001444(gb_AAG10151)	aslA
VFG001445(gb_AAA92657)	AAA92657
VFG001446(gb_WP_000768218)	sfaA
VFG001447(gb_CAA50007)	cnf1
VFG001713(gb_WP_001298062)	papX
VFG002039(gb_WP_001353651)	estIa
VFG002121(gb_WP_001025672)	nleA/espI
VFG002122(gb_WP_115801843)	nleC
VFG002123(gb_WP_001247926)	nleD
VFG002412(gb_WP_000716386)	yagY/ecpB
VFG002413(gb_WP_000389022)	ykgK/ecpR
VFG002414(gb_WP_000730972)	yagZ/ecpA
VFG002415(gb_WP_001131063)	yagX/ecpC
VFG002416(gb_WP_001265657)	yagW/ecpD
VFG002417(gb_WP_001301550)	yagV/ecpE
VFG012327(gb_WP_011076307)	sfaC
VFG012329(gb_WP_000046976)	sfaB
VFG012333(gb_WP_000703306)	sfaD
VFG012335(gb_WP_000975448)	sfaE
VFG012337(gb_WP_001370792)	sfaF
VFG012339(gb_WP_000237768)	sfaG
VFG012341(gb_WP_000767895)	sfaS
VFG012343(gb_WP_001234182)	sfaH
VFG012362(gb_WP_001092000)	espB
VFG012436(gb_WP_010904784)	espFu/tccP
VFG012438(gb_WP_000022458)	espJ
VFG012493(gb_WP_000528123)	cnf1
VFG012501(gb_WP_000271272)	iroE
VFG012505(gb_WP_000933673)	iroD
VFG012509(gb_WP_001111200)	iroC
VFG012513(gb_WP_001221122)	iroB
VFG012591(gb_WP_001017167)	chuS
VFG012597(gb_WP_000089593)	chuA
VFG012603(gb_WP_001302516)	chuT
VFG012609(gb_WP_000993317)	chuW
VFG012615(gb_WP_000020049)	chuX
VFG012621(gb_WP_000189352)	chuY
VFG012627(gb_WP_000910392)	chuU
VFG033389(gb_WP_000237766)	sfaG
VFG033393(gb_WP_001234181)	sfaH
VFG033422(gb_WP_000245814)	escG
VFG033439(gb_WP_000228584)	cesD2
VFG033448(gb_WP_001091991)	espB
VFG033457(gb_WP_000935757)	espD
VFG033466(gb_WP_000381567)	espA
VFG033475(gb_WP_001273446)	sepL
VFG033484(gb_WP_000953248)	escD
VFG033493(gb_WP_000098791)	cesT
VFG033502(gb_WP_001005220)	cesF
VFG033511(gb_WP_000803678)	sepQ/escQ
VFG033520(gb_WP_012579021)	escP
VFG033536(gb_WP_000622543)	escN
VFG033545(gb_WP_001037821)	escV
VFG033562(gb_WP_001059798)	escI
VFG033579(gb_WP_001063678)	sepD
VFG033587(gb_WP_000723931)	escC
VFG033604(gb_WP_000444178)	glrA
VFG033612(gb_WP_000605364)	glrR
VFG033621(gb_WP_000720637)	etgA
VFG033630(gb_WP_001291693)	escU
VFG033639(gb_WP_001002835)	escT
VFG033666(gb_WP_000780672)	escL
VFG033675(gb_WP_000151816)	escK
VFG033738(gb_WP_013009301)	espF
VFG033747(gb_WP_001359418)	tir
VFG033773(gb_WP_013009221)	espFu/tccP
VFG033788(gb_WP_001025657)	nleA/espI
VFG033805(gb_WP_001247931)	nleD
VFG034541(gb_WP_001080112)	etpA
VFG034574(gb_WP_000721278)	aap
VFG034575(gb_WP_000715633)	aafB
VFG034576(gb_WP_049794100)	aafC
VFG034577(gb_WP_014639428)	aafD
VFG034578(gb_WP_014639430)	aafA
VFG034612(gb_WP_000225871)	cfaA
VFG034624(gb_WP_000755097)	cfaB
VFG034636(gb_WP_000358674)	cfaC
VFG034648(gb_WP_001245988)	cfaD/cfaE
VFG034679(gb_WP_000074207)	ibeB
VFG034721(gb_WP_000556298)	ibeC
VFG034746(gb_WP_000938118)	espK
VFG034754(gb_WP_000081129)	espL1
VFG034761(gb_WP_001121629)	espL2
VFG034764(gb_WP_001121624)	espL2
VFG034772(gb_WP_000627910)	espL4
VFG034778(gb_WP_001144877)	espM1
VFG034780(gb_WP_001132163)	espM1
VFG034786(gb_WP_001132157)	espM2
VFG034788(gb_WP_001132161)	espM2
VFG034803(gb_NP_309594)	espO1-1
VFG034804(gb_ADD54989)	espO1-1
VFG034810(gb_NP_309848)	espO1-2
VFG034815(gb_WP_000671689)	espR1
VFG034817(gb_WP_000671691)	espR1
VFG034825(gb_WP_000484279)	espR3
VFG034826(gb_WP_000484292)	espR3
VFG034831(gb_WP_000484243)	espR4
VFG034837(gb_WP_024184430)	espV
VFG034840(gb_WP_001301665)	espW
VFG034849(gb_WP_000129338)	espX1
VFG034851(gb_WP_000129342)	espX1
VFG034859(gb_WP_010904544)	espX2
VFG034861(gb_WP_000340625)	espX2
VFG034866(gb_WP_000900547)	espX4
VFG034873(gb_WP_001270084)	espX5
VFG034875(gb_WP_001270087)	espX5
VFG034880(gb_WP_000535069)	espX6
VFG034882(gb_WP_000535079)	espX6
VFG034887(gb_WP_010904627)	espX7/nleL
VFG034895(gb_WP_001304001)	espY1
VFG034897(gb_WP_013009101)	espY1
VFG034901(gb_WP_000868321)	espY2
VFG034908(gb_WP_000978349)	espY3
VFG034910(gb_WP_000978351)	espY3
VFG034915(gb_WP_000225947)	espY4
VFG034917(gb_WP_000225946)	espY4
VFG034922(gb_WP_001303732)	espY5
VFG034928(gb_WP_001239082)	lifA/efa1
VFG034929(gb_WP_001239101)	lifA/efa1
VFG034932(gb_WP_000953022)	nleB1
VFG034942(gb_WP_000950813)	nleB2
VFG034951(gb_WP_000950786)	nleB2-2
VFG034954(gb_WP_000609742)	nleE
VFG034966(gb_WP_000938103)	nleF
VFG034975(gb_WP_001303944)	nleG-1
VFG034977(gb_WP_001144082)	nleG-1
VFG034984(gb_WP_001117986)	nleG-2
VFG034985(gb_WP_001131659)	nleG2-2
VFG034987(gb_WP_001131657)	nleG2-2
VFG034992(gb_WP_001131658)	nleG2-3
VFG035000(gb_WP_001131642)	nleG2-4
VFG035006(gb_WP_001117988)	nleG-3
VFG035012(gb_WP_001143784)	nleG5-1
VFG035020(gb_WP_001143808)	nleG5-2
VFG035025(gb_WP_001443810)	nleG6-1
VFG035027(gb_WP_013009182)	nleG6-1
VFG035032(gb_WP_010904693)	nleG6-2
VFG035037(gb_WP_000442132)	nleG6-3
VFG035043(gb_WP_010904670)	nleG7
VFG035045(gb_WP_001121226)	nleG7
VFG035053(gb_WP_001144077)	nleG8-2
VFG035062(gb_WP_000951026)	nleH1
VFG035073(gb_WP_000950979)	nleH2
VFG035902(gb_WP_000209220)	aatP
VFG035909(gb_WP_001216023)	aatA
VFG035916(gb_WP_032490785)	aatB
VFG035923(gb_WP_000621745)	aatC
VFG035929(gb_WP_014639418)	aatD
VFG036066(gb_WP_001426678)	eltA
VFG036068(gb_WP_012846869)	eltB
VFG042218(gb_AAN07916)	cif
VFG042219(gb_CAX32470)	espT
VFG042336(gb_WP_001034000)	espC
VFG042382(gb_WP_000260524)	etpB
VFG042389(gb_WP_000012013)	sfaY
VFG042390(gb_WP_011478152)	sfaX
VFG042567(gb_WP_000046975)	C_RS05810
VFG042568(gb_WP_000012016)	sfaY
VFG042569(gb_WP_001445604)	sfaX
VFG042784(gb_WP_000253757)	bfpA
VFG042788(gb_WP_000464849)	bfpU
VFG042789(gb_WP_012477166)	bfpD
VFG042791(gb_WP_001183608)	bfpF
VFG042793(gb_WP_012477167)	bfpH
VFG042794(gb_WP_000470346)	bfpI
VFG042796(gb_WP_000575683)	bfpK
VFG043732(gb_CAD48849)	cdtA
VFG043733(gb_CAD48850)	cdtB
VFG043734(gb_CAD48851)	cdtC
VFG044159(gb_WP_000125846)	fes
VFG044165(gb_WP_001041793)	entS
VFG044172(gb_WP_000622316)	chuV
VFG045328(gb_AHY03744)	east1
VFG045349(gb_WP_000092542)	fdeC
VFG045464(gb_WP_000562556)	tcpC
VFG045788(gb_WP_001189322)	cgsG
VFG045789(gb_WP_001264082)	cgsF
VFG045790(gb_WP_000833288)	cgsE
VFG045791(gb_WP_000481500)	cgsD
VFG045792(gb_WP_000791650)	csgB
VFG045793(gb_WP_000771429)	csgA
VFG045794(gb_WP_000992818)	csgC
VFG045818(gb_WP_001528154)	tsh
VFG050157(gb_WP_001331698)	kpsF
VFG050158(gb_WP_000905916)	kpsE
VFG050159(gb_WP_001331697)	kpsD
VFG050160(gb_WP_000030755)	kpsU
VFG050161(gb_WP_000579525)	kpsC
VFG050162(gb_WP_001161829)	kpsS
VFG050163(gb_WP_000197083)	neuE
VFG050164(gb_WP_000723250)	neuC
VFG050165(gb_WP_001259305)	neuA
VFG050166(gb_WP_000066003)	neuB
VFG050167(gb_WP_000038461)	neuD
VFG050168(gb_WP_000590258)	kpsT
VFG050169(gb_WP_000124301)	kpsM
VFG042845(gb_WP_003019818)	pilT
VFG042846(gb_WP_003021793)	pilE5
VFG042847(gb_WP_003015759)	pilD
VFG042848(gb_WP_003029368)	pilE4
VFG042850(gb_WP_003020879)	pilE2/pilE
VFG042851(gb_WP_003020882)	pilE/pilA
VFG042852(gb_WP_003021177)	pilF
VFG042853(gb_WP_003021324)	pilB
VFG042854(gb_WP_003021326)	pilC
VFG042855(gb_WP_003021368)	pilQ
VFG042856(gb_WP_003021372)	pilP
VFG042857(gb_WP_003015347)	pilO
VFG042858(gb_WP_003018618)	pilN
VFG042859(gb_WP_003022044)	fimT/pilW
VFG044194(gb_WP_003028588)	FTT_RS09560
VFG044195(gb_WP_003022876)	fslE
VFG044196(gb_WP_003022879)	fslD
VFG044197(gb_WP_003022882)	fslC
VFG044198(gb_WP_003022885)	fslB
VFG044199(gb_WP_003022888)	fslA
VFG044346(gb_WP_003020942)	fupA
VFG046318(gb_WP_003020917)	FTT_RS04695
VFG046465(gb_WP_003028672)	tufA
VFG046483(gb_WP_003019870)	fsaP
VFG046501(gb_WP_003020782)	ompA
VFG046519(gb_WP_003020038)	dipA
VFG046537(gb_WP_003013806)	ripA
VFG046553(gb_WP_003021808)	acpA
VFG046569(gb_WP_003017204)	acpB
VFG046582(gb_WP_003023398)	acpC
VFG046595(gb_WP_003021189)	hapA
VFG046610(gb_WP_003020688)	rpe
VFG046628(gb_WP_003020689)	FTT_RS04105
VFG046645(gb_WP_003020694)	galE
VFG046662(gb_WP_003020697)	FTT_RS04115
VFG046680(gb_WP_003020700)	FTT_RS04120
VFG046694(gb_WP_003020703)	FTT_RS04125
VFG046706(gb_WP_003025505)	FTT_RS04130
VFG046718(gb_WP_003016706)	FTT_RS04135
VFG046732(gb_WP_003020707)	FTT_RS04140
VFG046747(gb_WP_003020709)	FTT_RS04145
VFG046763(gb_WP_003020711)	FTT_RS04150
VFG046781(gb_WP_003016697)	FTT_RS04155
VFG046799(gb_WP_003020726)	capA
VFG046817(gb_WP_003016687)	capC
VFG046835(gb_WP_003020724)	capB
VFG046853(gb_WP_003029539)	waaY
VFG046871(gb_WP_003021537)	waaL/rfaL
VFG046887(gb_WP_003021676)	lpxD2
VFG046903(gb_WP_003020229)	flmF2
VFG046921(gb_WP_003020232)	flmK
VFG046938(gb_WP_003014609)	lpxE
VFG046955(gb_WP_003021532)	lpcC
VFG046972(gb_WP_003018480)	waaZ
VFG046988(gb_WP_003022277)	manB
VFG047006(gb_WP_003022279)	manC
VFG047022(gb_WP_003029663)	wbtM
VFG047039(gb_WP_003018140)	wbtL
VFG047055(gb_WP_003022283)	wbtK
VFG047068(gb_WP_003022285)	wzx
VFG047082(gb_WP_003022287)	wbtJ
VFG047095(gb_WP_003014989)	wbtI
VFG047111(gb_WP_003022291)	wbtH
VFG047125(gb_WP_003022292)	wbtG
VFG047137(gb_WP_003022294)	wzy
VFG047149(gb_WP_003029668)	wbtF
VFG047162(gb_WP_003022298)	wbtE
VFG047176(gb_WP_003014978)	wbtD
VFG047189(gb_WP_003014975)	wbtC
VFG047204(gb_WP_003025211)	wbtB
VFG047221(gb_WP_003022302)	wbtA
VFG047239(gb_WP_003022463)	kdtA
VFG047256(gb_WP_003027098)	lpxA/glmU
VFG047274(gb_WP_003014857)	lpxD
VFG047401(gb_WP_011242229)	feoB
VFG047416(gb_WP_003026320)	fmvB
VFG047431(gb_WP_003016957)	bplA
VFG047461(gb_WP_003020969)	bioD
VFG047478(gb_WP_003020972)	bioC
VFG047495(gb_WP_003020974)	bioF
VFG047512(gb_WP_003020978)	bioB
VFG047529(gb_WP_003029409)	bioA
VFG047546(gb_WP_003016401)	bioJ
VFG047564(gb_WP_003020889)	purM
VFG047582(gb_WP_003020892)	purCD
VFG047600(gb_WP_003021415)	ggt
VFG047618(gb_WP_003019748)	ileP
VFG047636(gb_WP_003027757)	ansP
VFG047654(gb_WP_003020284)	gadC
VFG047672(gb_WP_003021043)	argP
VFG047690(gb_WP_003022616)	pyrB
VFG047708(gb_WP_003022611)	carB
VFG047726(gb_WP_003013939)	carA
VFG047748(gb_WP_003022122)	pdpA
VFG047777(gb_WP_003022126)	pdpB
VFG047806(gb_WP_003022128)	iglE/tssJ
VFG047834(gb_WP_003016192)	vgrG
VFG047860(gb_WP_003022130)	iglF/clpV
VFG047889(gb_WP_003018233)	iglG
VFG047917(gb_WP_003022137)	iglH
VFG047945(gb_WP_003016181)	dotU/tssL
VFG047973(gb_WP_003016179)	iglI
VFG048002(gb_WP_003022141)	iglJ
VFG048030(gb_WP_003022143)	pdpC
VFG048055(gb_WP_003022145)	pdpE
VFG048082(gb_WP_003023944)	iglD/tssK
VFG048111(gb_WP_014367985)	iglC/hcp
VFG048140(gb_WP_003022151)	iglB/tssC
VFG048169(gb_WP_003022153)	iglA/tssB
VFG048194(gb_WP_003022155)	pdpD
VFG000326(gb_WP_105163169)	licA
VFG000327(gb_WP_005672105)	licB
VFG000328(gb_WP_005693563)	licC
VFG000329(gb_WP_005693564)	licD
VFG000330(gb_WP_005694491)	kdtA
VFG000331(gb_WP_005693548)	rfaE
VFG000332(gb_WP_005632797)	rfaD
VFG000333(gb_WP_005694147)	lic2A
VFG000334(gb_WP_005694343)	oapA
VFG000335(gb_WP_010869142)	ompP5
VFG000336(gb_WP_005694426)	ompP2
VFG000337(gb_WP_005693332)	iga1
VFG000338(gb_WP_005693337)	tbpA
VFG000339(gb_WP_005693338)	tbpB
VFG000340(gb_WP_005694039)	hxuA
VFG000341(gb_WP_005694040)	hxuB
VFG000343(gb_WP_164927854)	hitB
VFG000344(gb_WP_005693820)	hitC
VFG000347(gb_WP_010869038)	hgpC
VFG000348(gb_WP_005694042)	hxuC
VFG000685(gb_AAP42178)	bexB'
VFG000686(gb_AAP42179)	bexC
VFG000687(gb_AAP42180)	bexD
VFG000688(gb_AAP42181)	bcs1
VFG000689(gb_AAP42182)	bcs2
VFG000690(gb_AAP42183)	AAP42183
VFG000691(gb_AAP42184)	AAP42184
VFG000692(gb_AAP42185)	hcsA
VFG000693(gb_AAP42186)	hcsB
VFG000694(gb_AAP42187)	AAP42187
VFG000696(gb_AAP42188)	bexA
VFG000704(gb_AAP42196)	hscA
VFG001144(gb_CAA83905)	hifA
VFG001145(gb_CAA83901)	hifB
VFG001146(gb_CAA83902)	hifC
VFG001147(gb_CAA83903)	hifD
VFG001148(gb_CAA83904)	hifE
VFG001149(gb_AAB03707)	hap
VFG001151(gb_AAA20527)	hmw1A
VFG001152(gb_AAA20528)	hmw1B
VFG001153(gb_AAA20529)	hmw1C
VFG001154(gb_AAA20524)	hmw2A
VFG001155(gb_AAA20525)	hmw2B
VFG001156(gb_AAA20526)	hmw2C
VFG013236(gb_WP_005693864)	kdsB
VFG013242(gb_WP_005693863)	lpxK
VFG013248(gb_WP_010868928)	msbA
VFG013254(gb_WP_005694093)	msbB
VFG013260(gb_WP_010868968)	lgtC
VFG013265(gb_WP_005694045)	orfM
VFG013271(gb_WP_005694044)	kdkA
VFG013276(gb_WP_010868969)	opsX/rfaC
VFG013281(gb_WP_005694030)	lpt6
VFG013286(gb_WP_005694325)	galE
VFG013292(gb_WP_105163174)	lic3A
VFG013299(gb_WP_010868996)	waaQ
VFG013315(gb_WP_005694490)	lgtF
VFG013321(gb_WP_005693139)	lpxH
VFG013327(gb_WP_010869047)	manB/yhxB
VFG013342(gb_WP_010869051)	lpsA
VFG013346(gb_WP_005693178)	galU
VFG013352(gb_WP_005693216)	HI_RS04620
VFG013354(gb_WP_005648226)	kfiC
VFG013361(gb_WP_005693221)	siaA
VFG013365(gb_WP_010869077)	wbaP/rfbP
VFG013368(gb_WP_005693225)	rffG
VFG013374(gb_WP_005693262)	lpxD
VFG013380(gb_WP_005693345)	yhbX
VFG013384(gb_WP_010869121)	lpxB
VFG013390(gb_WP_005651701)	lpxA
VFG013400(gb_WP_005693429)	rfaF
VFG013412(gb_WP_005693459)	lpxC
VFG013418(gb_WP_005694260)	gmhA/lpcA
VFG013424(gb_WP_032828466)	neuA
VFG013436(gb_WP_005693550)	htrB
VFG013465(gb_WP_005693586)	kdsA
VFG013471(gb_WP_005693601)	lgtA
VFG013476(gb_WP_032828451)	kpsF
VFG013482(gb_WP_164927871)	lsgF
VFG013487(gb_WP_005694185)	lsgE
VFG013491(gb_WP_005694186)	lsgD
VFG013496(gb_WP_005694187)	lsgC
VFG013500(gb_WP_010869274)	lsgB
VFG013503(gb_WP_005694190)	lsgA
VFG013508(gb_WP_005694200)	wecA
VFG013594(gb_WP_164927859)	hgpB
VFG045329(gb_AAB36696)	hhuA
VFG000269(gb_WP_000779223)	ureA
VFG000270(gb_WP_000724295)	ureB
VFG000271(gb_WP_000901247)	ureI
VFG000272(gb_WP_000583097)	ureE
VFG000273(gb_WP_000357404)	ureF
VFG000274(gb_WP_000238762)	ureG
VFG000275(gb_WP_001099471)	ureH
VFG000276(gb_WP_000885496)	flaA
VFG000277(gb_WP_000010001)	flaB
VFG000278(gb_WP_000946389)	flgE_1
VFG000279(gb_WP_000405496)	vacA
VFG000280(gb_WP_000785752)	cag1
VFG000282(gb_WP_000488766)	cag3
VFG000283(gb_WP_000462193)	virB1/cag4
VFG000284(gb_WP_000389328)	virD4/cag5
VFG000285(gb_WP_000133885)	virB11
VFG000286(gb_WP_000418809)	cagZ
VFG000287(gb_WP_001001434)	virB10/cagY
VFG000288(gb_WP_000529349)	virB9/cagX
VFG000289(gb_WP_000481884)	virB6/cagW
VFG000290(gb_WP_000900785)	virB8/cagV
VFG000291(gb_WP_001000423)	cagU
VFG000292(gb_WP_000776464)	virB7/cagT
VFG000293(gb_WP_000069596)	cagS
VFG000294(gb_WP_000938081)	cagQ
VFG000295(gb_WP_001863356)	cagP
VFG000296(gb_WP_000879904)	cagM
VFG000297(gb_WP_000835501)	cagN
VFG000298(gb_WP_000855299)	virB5/cagL
VFG000299(gb_WP_000649592)	cagI
VFG000300(gb_WP_010875497)	cagH
VFG000301(gb_WP_000855900)	cagG
VFG000302(gb_WP_000814259)	cagF
VFG000303(gb_WP_000495985)	virB4/cagE
VFG000304(gb_WP_000609477)	cagD
VFG000305(gb_WP_000668162)	virB2/cagC
VFG000306(gb_WP_000180747)	cagA
VFG000307(gb_WP_000846461)	napA
VFG000308(gb_WP_000487428)	futA
VFG000309(gb_WP_000487430)	futB
VFG000310(gb_WP_001201399)	pseFG
VFG000311(gb_WP_000941291)	pseI
VFG000312(gb_WP_000542820)	sabA/hopP
VFG000313(gb_WP_001174195)	gluP
VFG000314(gb_WP_001186109)	gluE
VFG000315(gb_WP_000694809)	rfbM
VFG000316(gb_WP_000684682)	rfaC
VFG000317(gb_WP_000022419)	rfaJ
VFG000318(gb_WP_000380989)	HP_RS07005
VFG000320(gb_WP_001169234)	kdtB
VFG000321(gb_WP_000659810)	rfbD
VFG000322(gb_WP_001002442)	wbcJ
VFG000323(gb_WP_001142178)	lpxB
VFG001142(gb_WP_042960771)	hopZ
VFG001143(gb_WP_000709741)	oipA/hopH
VFG006339(gb_WP_000716249)	babA/hopS
VFG006342(gb_WP_000753173)	babB/hopT
VFG006349(gb_WP_000542818)	sabB/hopO
VFG006512(gb_WP_010875440)	futC1
VFG006528(gb_WP_000245963)	flaG
VFG006533(gb_WP_000883720)	fliR
VFG006538(gb_WP_000832067)	flgI
VFG006543(gb_WP_001266636)	flgL
VFG006548(gb_WP_000709989)	flgH
VFG006553(gb_WP_000742697)	pseH/flmH/flaG1
VFG006557(gb_WP_000364750)	fliF
VFG006562(gb_WP_000201853)	fliG
VFG006567(gb_WP_000056222)	fliH
VFG006572(gb_WP_001179202)	flgG
VFG006577(gb_WP_001262893)	flhA
VFG006582(gb_WP_001862801)	flhF
VFG006587(gb_WP_000602430)	fliA
VFG006592(gb_WP_000763575)	fliM
VFG006597(gb_WP_001150629)	fliY
VFG006602(gb_WP_000004827)	fliN
VFG006612(gb_WP_010875540)	fliD
VFG006617(gb_WP_001199081)	fliS
VFG006622(gb_WP_000796857)	flhB
VFG006627(gb_WP_000797017)	fliL
VFG006632(gb_WP_000366185)	motA
VFG006637(gb_WP_001085308)	motB
VFG006647(gb_WP_000963306)	flgD
VFG006652(gb_WP_001000225)	flgE
VFG006657(gb_WP_000508899)	flgK
VFG006662(gb_WP_000266337)	pflA
VFG006667(gb_WP_000445741)	fliQ
VFG006672(gb_WP_001128709)	fliI
VFG006677(gb_WP_000697639)	flgA
VFG006681(gb_WP_001147918)	fliE
VFG006686(gb_WP_000480097)	flgC
VFG006696(gb_WP_001044050)	flhB2
VFG006701(gb_WP_000946438)	flgG_2
VFG043364(gb_WP_000785454)	cheV1
VFG043365(gb_WP_000843374)	tlpC
VFG043366(gb_WP_000033553)	tlpA
VFG043367(gb_WP_000971620)	tlpB
VFG043368(gb_WP_000748581)	flgS
VFG043369(gb_WP_000712783)	HP0256
VFG043371(gb_WP_000657303)	pseC
VFG043372(gb_WP_000070768)	cheW
VFG043373(gb_WP_000342347)	cheA
VFG043374(gb_WP_000818647)	cheV2
VFG043375(gb_WP_000715711)	hpaA2
VFG043376(gb_WP_000442290)	HP_RS02435
VFG043377(gb_WP_000757130)	cds6
VFG043378(gb_WP_000467802)	cheV3
VFG043379(gb_WP_000251148)	HP_RS03030
VFG043381(gb_WP_000684509)	flgR
VFG043382(gb_WP_000996418)	HP_RS03480
VFG043383(gb_WP_001863409)	pseB
VFG043384(gb_WP_001091835)	HP_RS04690
VFG043385(gb_WP_001064464)	ylxH
VFG043386(gb_WP_000772151)	cheY
VFG043387(gb_WP_001863090)	flgM
VFG043389(gb_WP_000603368)	HP_RS07240
VFG043390(gb_WP_001210849)	pdxJ
VFG043391(gb_WP_001075036)	pdxA
VFG050273(gb_WP_000874844)	futC2
VFG043623(gb_WP_002916122)	mrkF
VFG043624(gb_WP_004149659)	mrkD
VFG043625(gb_WP_000813718)	mrkC
VFG043626(gb_WP_000820818)	mrkB
VFG043627(gb_WP_000756959)	mrkA
VFG044322(gb_WP_004190148)	iroE
VFG044323(gb_WP_015874960)	ybtS
[truncated: 2,189 more rows]

## Sheet: Par
Par Protein	Protein ID			Sequences obtained through UniRef50 cluster of each protein in the first column
incC2	INCC2_ECOLX
incC2	A0A022FP36_9BURK
incC2	A0A069IJR3_9BURK
incC2	A0A077KSU7_9BURK
incC2	A0A0C5BMF3_ALCXX
incC2	A0A0D3RKH8_PROMI
incC2	A0A0D3RKJ3_PROMI
incC2	A0A0D3RKR0_BORBO
incC2	A0A0D3RNE5_BORBO
incC2	A0A0F4FJU5_RHIRD
incC2	A0A0F6QFA8_9HYPH
incC2	A0A0K6IC84_9BURK
incC2	A0A0U1QTB1_YERP3
incC2	A0A0V8SM86_PSESD
incC2	A0A109C1B8_9BURK
incC2	A0A192XEL3_VARPD
incC2	A0A1A5DBK5_9PSED
incC2	A0A1G5PG09_9PSED
incC2	A0A1G9VX77_9BURK
incC2	A0A1H7CQ27_9PSED
incC2	A0A1M6Y0S6_9BURK
incC2	A0A1P8K4W7_9BURK
incC2	A0A1U9V3J7_CUPNE
incC2	A0A1V9HGZ6_9XANT
incC2	A0A244E4X5_9BURK
incC2	A0A259EBL4_9PROT
incC2	A0A2H4I9T7_9BACT
incC2	A0A2J7VJF5_9BURK
incC2	A0A2L0U0T1_9GAMM
incC2	A0A2N7XZW4_9PSED
incC2	A0A2N8K975_9BURK
incC2	A0A2R4AH21_ECOLX
incC2	A0A2R4BT13_THAAR
incC2	A0A2S1JKU1_PSEAI
incC2	A0A2S7EQV5_9XANT
incC2	A0A2S7FHQ2_PSEOL
incC2	A0A2Z6ITQ0_9BURK
incC2	A0A2Z6IU81_9BURK
incC2	A0A2Z6IUT0_9RALS
incC2	A0A4V1BZU8_9BURK
incC2	A0A510BP30_VIBAL
incC2	A0A515HHU8_9ZZZZ
incC2	A0A515HHV7_9ZZZZ
incC2	A0A515HI12_9ZZZZ
incC2	A0A515HI22_9ZZZZ
incC2	A0A515HIM6_9ZZZZ
incC2	A0A515HIV2_9ZZZZ
incC2	A0A515HIV7_9ZZZZ
incC2	A0A515HJ68_9ZZZZ
incC2	A0A515HJ69_9ZZZZ
incC2	A0A515HJI1_9ZZZZ
incC2	A0A515HK54_9ZZZZ
incC2	A0A515HKB5_9ZZZZ
incC2	A0A515HKC0_9ZZZZ
incC2	A0A6B9D1R6_9BACT
incC2	A0A6B9D5W7_9BACT
incC2	A0A6B9DB22_9BACT
incC2	A0A6C0L2Z8_PSEAI
incC2	A0A6M1MF43_9HYPH
incC2	A0A6M6ILM3_9BURK
incC2	A0A6N7D329_9BURK
incC2	A0A6P1IUQ3_9BURK
incC2	A0A6P1J3A9_9BURK
incC2	A0A6P2FTB6_9BURK
incC2	A0A6S7EB54_9BURK
incC2	A0A7D4E037_9BURK
incC2	A0A7G1LC94_AERHY
incC2	A0A7L8S7I6_9HYPH
incC2	A0A7M2HE89_9BURK
incC2	A0A7T0Q7Y0_MORMO
incC2	A0A7T1DZ18_9BURK
incC2	A0A7U1HQG8_PSEAI
incC2	A0A7Y1A8Q0_9PSED
incC2	A0A829HMQ7_9MYCO
incC2	A0A899NCH1_ECOLX
incC2	A0A899NCK1_ECOLX
incC2	A0A899ND76_ECOLX
incC2	A0A899NF22_ECOLX
incC2	A0A8B0RWM0_9BURK
incC2	A0A8D6MII2_AERCA
incC2	A6H990_9ZZZZ
incC2	A6H991_9ZZZZ
incC2	A7K7G4_COMTE
incC2	A7K7G5_COMTE
incC2	B2IAV1_XYLF2
incC2	C5NNC7_PHODP
incC2	D4N5L7_9BACT
incC2	E3HXU4_ACHXA
incC2	E8PRL4_9BACT
incC2	F2FB22_9ZZZZ
incC2	F2Q6B5_9BACT
incC2	G9C9I2_COMTE
incC2	G9C9I3_COMTE
incC2	G9C9R6_DELAC
incC2	G9C9R7_DELAC
incC2	G9CA64_DELAC
incC2	G9CA65_DELAC
incC2	G9FAN5_9BACT
incC2	G9FB78_9BACT
incC2	G9FBJ1_9BACT
incC2	H2EPN7_9BACT
incC2	H2EPS4_9BACT
incC2	I1Z0Z0_9BURK
incC2	I1Z0Z2_9BURK
incC2	I2ALI0_9MYCO
incC2	I3RYD9_9BURK
incC2	I3RYN0_RALPI
incC2	J9R775_9BACT
incC2	J9R8L7_BURCE
incC2	J9RP48_9BACT
incC2	J9RYM0_9BACT
incC2	J9S0G9_9BACT
incC2	J9S0N5_9BACT
incC2	J9Z6L3_9BACT
incC2	J9Z868_9BACT
incC2	J9Z8U7_9BACT
incC2	L7SVE7_XYLFS
incC2	M9UWZ9_9BURK
incC2	P97149_KLEAE
incC2	Q08L13_BORPT
incC2	Q08L14_BORPT
incC2	Q0B128_BURCM
incC2	Q0E675_PSEAI
incC2	Q0E676_PSEAI
incC2	Q1H9Z6_9BACT
incC2	Q1H9Z7_9BACT
incC2	Q3BL57_9BACT
incC2	Q3BL58_9BACT
incC2	Q4AC64_9SPHN
incC2	INCC1_ECOLX
incC2	Q52325_9ZZZZ
incC2	Q5GR92_ACHXA
incC2	Q5W3F5_9BACT
incC2	Q5W3F6_9BACT
incC2	Q5ZHC8_9BACT
incC2	Q6QHR1_ACHDE
incC2	Q6QHR2_ACHDE
incC2	Q6UPB4_CUPPJ
incC2	Q6UPB5_CUPPJ
incC2	Q76LY4_DELAC
incC2	Q76LZ3_DELAC
incC2	Q79BS7_PSESD
incC2	Q7X3C2_9BACT
incC2	Q7X3C4_9BACT
incC2	Q8RSN2_9BACT
incC2	Q8RSN3_9BACT
incC2	U1ZIM0_9PSED
korB	KORB1_ECOLX
korB	A0A022FQ45_9BURK
korB	A0A069IBP2_9BURK
korB	A0A077KUN1_9BURK
korB	A0A0C5C6B8_ALCXX
korB	A0A0C5XPN9_SPHYB
korB	A0A0D3RLI8_BORBO
korB	A0A0D3RN69_PROMI
korB	A0A0F4FJL3_RHIRD
korB	A0A0F6QCA9_9HYPH
korB	A0A0H3W1A6_9BACT
korB	A0A0K6IC33_9BURK
korB	A0A0M3B189_9HYPH
korB	A0A0Q2Q005_XYLFS
korB	A0A0Q4EYF2_9SPHN
korB	A0A0Q4IQE1_9SPHN
korB	A0A0U1QT75_YERP3
korB	A0A125NYC5_9BURK
korB	A0A142JWP5_9BURK
korB	A0A158J0R7_9BURK
korB	A0A158RY69_9SPHN
korB	A0A192XEK3_VARPD
korB	A0A193PYQ6_YERPE
korB	A0A1A5DA57_9PSED
korB	A0A1E1F911_9SPHN
korB	A0A1E4JAC4_9SPHN
korB	A0A1G5PG25_9PSED
korB	A0A1G9VX96_9BURK
korB	A0A1H3KK21_9PROT
korB	A0A1H7CDV5_9PSED
korB	A0A1I9ZJ99_KLEPN
korB	A0A1L1PJU4_HYDIT
korB	A0A1L4A0L6_9SPHN
korB	A0A1L5QZ20_9XANT
korB	A0A1M6Y0X4_9BURK
korB	A0A1P8K4V4_9BURK
korB	A0A1Q5VLN2_9GAMM
korB	A0A1Q8IKT8_9BURK
korB	A0A1R0FP65_CITBR
korB	A0A1U9V4J6_CUPNE
korB	A0A1V9HH03_9XANT
korB	A0A1W9KQ32_9BURK
korB	A0A244E4X8_9BURK
korB	A0A259EBK6_9PROT
korB	A0A263VLZ0_ENTAS
korB	A0A290ZVD2_9RHOO
korB	A0A2C9ZH95_9SPHN
korB	A0A2G8SYM6_9BURK
korB	A0A2J7VJG7_9BURK
korB	A0A2L0U0V5_9GAMM
korB	A0A2L0VW55_9SPHN
korB	A0A2N6G829_9GAMM
korB	A0A2N7XZL2_9PSED
korB	A0A2N8K980_9BURK
korB	A0A2P4RP90_RALPI
korB	A0A2P8L6G9_9PSED
korB	A0A2R4AH32_ECOLX
korB	A0A2R4BSM0_THAAR
korB	A0A2R4NXD0_9GAMM
korB	A0A2S1JKV7_PSEAI
korB	A0A2S7EQU0_9XANT
korB	A0A2S7FH55_PSEOL
korB	A0A2S8B048_9SPHN
korB	A0A2S9KCE6_9BURK
korB	A0A2V1H4L0_9GAMM
korB	A0A2W6WHN7_9SPHN
korB	A0A2Z6IT85_9BURK
korB	A0A2Z6ITL8_9BURK
korB	A0A2Z6ITR2_9BURK
korB	A0A2Z6ITY1_9BURK
korB	A0A2Z6IU66_9BURK
korB	A0A2Z6IUE0_9BURK
korB	A0A2Z6IUT6_9RALS
korB	A0A2Z6IV24_9BURK
korB	A0A318SI38_9BURK
korB	A0A379XXK4_SALDZ
korB	A0A3U3FNA5_SALTM
korB	A0A411GRZ0_ENTCL
korB	A0A494RAD6_9PSED
korB	A0A4D7DIT9_9SPHN
korB	A0A4P7LVS2_9BURK
korB	A0A4Q2QUK6_9ENTR
korB	A0A4R6DUG0_9ENTR
korB	A0A4U5ZR52_9HYPH
korB	A0A510BP35_VIBAL
korB	A0A514WRK7_9SPHN
korB	A0A515HHW4_9ZZZZ
korB	A0A515HII8_9ZZZZ
korB	A0A515HIP7_9ZZZZ
korB	A0A515HIX5_9ZZZZ
korB	A0A515HJ82_9ZZZZ
korB	A0A515HKB6_9ZZZZ
korB	A0A522DYR4_9GAMM
korB	A0A533I1P7_PARDE
korB	A0A533QIC3_9PROT
korB	A0A5B8CNX7_SPHSA
korB	A0A5J6LLA9_9GAMM
korB	A0A5S4ERF0_9PROT
korB	A0A5T4VFR5_SALER
korB	A0A5W7RYM7_SALET
korB	A0A634EZ04_SALEN
korB	A0A6B9D1M2_9BACT
korB	A0A6B9DB60_9BACT
korB	A0A6C0L127_PSEAI
korB	A0A6F8V780_9ENTR
korB	A0A6G8F535_KLEPN
korB	A0A6L6I703_ECOLX
korB	A0A6L6Q9F6_9BURK
korB	A0A6M1MD21_9HYPH
korB	A0A6M6IKS3_9BURK
korB	A0A6N1X8D0_9BURK
korB	A0A6N7D317_9BURK
korB	A0A6P1GQD5_SPHYA
korB	A0A6P1ITH3_9BURK
korB	A0A6P1J4V7_9BURK
korB	A0A6P2FT75_9BURK
korB	A0A6P2FZF4_9BURK
korB	A0A6P2G2L9_9BURK
korB	A0A6S6LES6_ECOLX
korB	A0A6S7E9I7_9BURK
korB	A0A6Y0Z8N9_SALET
korB	A0A6Y4WCB9_SALET
korB	A0A731N951_SALMU
korB	A0A736LIA5_SALET
korB	A0A7C9MTW5_9BURK
korB	A0A7D4DUH1_9BURK
korB	A0A7G1LEG0_AERHY
korB	A0A7I6N9X6_9BACT
korB	A0A7I8I5W3_AERCA
korB	A0A7L8S7G8_9HYPH
korB	A0A7M2HC32_9BURK
korB	A0A7T0Q800_MORMO
korB	A0A7T1DYX8_9BURK
korB	A0A7T2RYL7_DELAC
korB	A0A7U1DZ41_PSEAI
korB	A0A7W6BMP2_9SPHN
korB	A0A7X1WIG0_9PSED
korB	A0A7X1WVR6_9PSED
korB	A0A7Y1FAY4_9PSED
korB	A0A7Y2SHP7_9ACTN
korB	A0A7Y4ZDP2_9GAMM
korB	A0A7Z1D2S4_SHISO
korB	A0A806WSM1_XYLFS
korB	A0A822X4J9_9ENTR
korB	A0A829HLG8_9MYCO
korB	A0A833JU38_9GAMM
korB	A0A899NC07_ECOLX
korB	A0A899ND59_ECOLX
korB	A0A899NIT4_ECOLX
korB	A0A8B0RUD7_9BURK
korB	A0A8B6LZH6_9BURK
korB	A0A8B7NKJ5_HYAAZ
korB	A0A8D6MCG6_AERCA
korB	A6H989_9ZZZZ
korB	A7K7G3_COMTE
korB	B2IAV0_XYLF2
korB	C5NNC6_PHODP
korB	C7RVT8_ACCRE
korB	D4N5L6_9BACT
korB	E3HXU3_ACHXA
korB	E4PRS3_MARAH
korB	F2FB21_9ZZZZ
korB	F2Q6B4_9BACT
korB	G4T4H9_META2
korB	G9C9I1_COMTE
korB	G9C9R5_DELAC
korB	G9C9Y8_COMTE
korB	G9CA63_DELAC
korB	G9FB77_9BACT
korB	G9FBJ0_9BACT
korB	H2EQ12_9BACT
korB	I1YLS8_METFJ
korB	I1Z0Z3_9BURK
korB	I2ALH9_9MYCO
korB	I3RYD8_9BURK
korB	J9RNP6_9BACT
korB	J9RP87_9BACT
korB	J9RPH2_9BACT
korB	J9RQ17_BURCE
korB	J9RT80_9BACT
korB	J9Z7Z7_9BACT
korB	L0WCE1_9GAMM
korB	L7SSU9_XYLFS
korB	M9UX56_9BURK
korB	N1MPQ4_9SPHN
korB	Q08L15_BORPT
korB	Q0B127_BURCM
korB	Q0E677_PSEAI
korB	Q1H9Z8_9BACT
korB	Q2VLA3_BURCE
korB	Q4AC65_9SPHN
korB	Q5GR93_ACHXA
korB	Q5ZHC9_9BACT
korB	Q6QHR3_ACHDE
korB	Q6UPB6_CUPPJ
korB	Q76LZ4_DELAC
korB	Q7X3C5_9BACT
korB	Q8RSN4_9BACT
korB	Q937C5_PSESD
korB	S5TAY1_9GAMM
korB	T0I897_9SPHN
korB	U2A071_9PSED
korB	U3LPD7_9BACT
korB	V0YCL0_ECOLX
korB	W6AVN6_ECOLX
korB	W7WYM1_9BURK
ParB	PARB_ECOLX
ParB	A0A023L258_ECOLX
ParB	A0A024J4F1_SALEP
ParB	A0A060RF35_ECOLX
ParB	A0A071LQH6_9ENTR
ParB	A0A077SK15_9CAUD
ParB	A0A090N923_SHIDY
ParB	A0A0B1RB14_9GAMM
ParB	A0A0C4Y456_KLEPN
ParB	A0A0C5EWE4_ECOLX
ParB	A0A0D3RK11_KLEPN
ParB	A0A0E0SR99_ECOLX
ParB	A0A0E1CM07_KLEPN
ParB	A0A0E1M5R9_ECOLX
ParB	A0A0F0YQC0_ENTCL
ParB	A0A0F0ZY71_9ENTR
ParB	A0A0F6AW65_SALT1
ParB	A0A0G3Q5J7_9ENTR
ParB	A0A0H3GZ74_KLEPH
ParB	A0A0H3L408_PANAA
ParB	A0A0H3NYF3_SALTS
ParB	A0A0I0UTJ1_SHISO
ParB	A0A0J1M9E0_9ENTR
ParB	A0A0J8YAX7_9GAMM
ParB	A0A0K1L945_SALEN
ParB	A0A0K1L9I2_SALEN
ParB	A0A0K2P8X2_9ENTR
ParB	A0A0N9NJW0_PECCA
ParB	A0A0S4JSM4_SALEN
ParB	A0A0T7RXX5_SALET
ParB	A0A0U5LAD4_9GAMM
ParB	A0A0X8N974_SALER
ParB	A0A1B0V750_9CAUD
ParB	A0A1B7HGH1_9ENTR
ParB	A0A1B7HJX8_9ENTR
ParB	A0A1D9NAD7_KLEPN
ParB	A0A1I5B8H0_9GAMM
ParB	A0A1I5EKE1_9GAMM
ParB	A0A1Q8YLN7_9ENTR
ParB	A0A1S0Z9C6_SALET
ParB	A0A1S6L5B4_SALTM
ParB	A0A1S6XXR3_ENTCL
ParB	A0A1S7H7L3_SALTM
ParB	A0A1S9K599_SHIDY
ParB	A0A1V3YWN6_KLEAE
ParB	A0A1V9DA23_9GAMM
ParB	A0A1W6BB82_9GAMM
ParB	A0A1W6C1H4_9BACT
ParB	A0A1X1C2I2_9GAMM
ParB	A0A1X1D0L4_9GAMM
ParB	A0A1X1EGX1_PANCY
ParB	A0A1X3HYM3_ECOLX
ParB	A0A1X3M134_ECOLX
ParB	A0A1X7M5Z2_9ENTR
ParB	A0A1X9QAH7_ECOLX
ParB	A0A1Z1VX45_SALSP
ParB	A0A1Z3MME3_KLEOX
ParB	A0A200L3Q3_SHISO
ParB	A0A222ZCS2_CROSK
ParB	A0A246NE22_9GAMM
ParB	A0A251ZD37_PLUGE
ParB	A0A256DPD6_CITFR
ParB	A0A285L4A1_9ENTR
ParB	A0A286DPR8_9ENTR
ParB	A0A290FTM7_CITFR
ParB	A0A291E636_9ENTR
ParB	A0A2H4WJT8_KLEPN
ParB	A0A2I2H8F3_ECOLX
ParB	A0A2I2HRS2_ECOLX
ParB	A0A2I8QDU2_9ENTR
ParB	A0A2I8QFA9_9ENTR
ParB	A0A2J0QSG0_9ENTR
ParB	A0A2J9ER39_9GAMM
ParB	A0A2L1KQ48_ENTCL
ParB	A0A2M9WHP8_9GAMM
ParB	A0A2N4Z8L1_KLEVA
ParB	A0A2N5ADB5_KLEVA
ParB	A0A2P9E028_ECOLX
ParB	A0A2P9EN81_ECOLX
ParB	A0A2S1JHC8_ENTCL
ParB	A0A2S4RRD4_CITAM
ParB	A0A2S5K8F6_9GAMM
ParB	A0A2S8D6M4_SHIDY
ParB	A0A2S8DIN4_SHIBO
ParB	A0A2T6WXT7_SALET
ParB	A0A2T7AWX7_9ENTR
ParB	A0A2T7B3D1_9ENTR
ParB	A0A2T8T171_SALER
ParB	A0A2T8WUX3_SALET
ParB	A0A2U8SZY7_PSEAI
ParB	A0A2V2BJY6_9GAMM
ParB	A0A2V3Q5D9_9GAMM
ParB	A0A2V5CP92_9GAMM
ParB	A0A2W0FUA1_9ENTR
ParB	A0A2X1S5B4_KLEPN
ParB	A0A330DB43_9ENTR
ParB	A0A345JNZ7_SALET
ParB	A0A345X083_ECOLX
ParB	A0A346JD97_ECOLX
ParB	A0A348DML1_9ENTR
ParB	A0A370S0I0_SERFO
ParB	A0A372C140_KLEPN
ParB	A0A376KS20_9ENTR
ParB	A0A376WRK2_ECOLX
ParB	A0A376YJN6_ECOLX
ParB	A0A377BYA6_ECOLX
ParB	A0A377TDE0_HAFAL
ParB	A0A377TIB0_KLEPN
ParB	A0A377TIG1_ECOLX
ParB	A0A377YPM0_KLEPN
ParB	A0A377YWZ3_KLEPO
ParB	A0A379LTY0_ENTAG
ParB	A0A381KUA1_CITFR
ParB	A0A387K190_9ENTR
ParB	A0A3I6HA74_SALER
ParB	A0A3J2D9N1_SALER
ParB	A0A3K0WLG2_ECOLX
ParB	A0A3K0WLL9_ECOLX
ParB	A0A3K8YRT4_SALER
ParB	A0A3N4NKU0_9GAMM
ParB	A0A3Q0N4X6_ECOLX
ParB	A0A3Q8VKM6_CITBR
ParB	A0A3R0C2Y2_SALET
ParB	A0A3R0JSC9_SHIDY
ParB	A0A3R0X2T2_SHIDY
ParB	A0A3R9NE24_9ENTR
ParB	A0A3T0VET5_KLEPN
ParB	A0A3U2M8C5_SALET
ParB	A0A3U2S020_SALET
ParB	A0A3U2WFQ7_SALET
ParB	A0A3U4LKA4_SALET
ParB	A0A3V0JA49_SALTM
ParB	A0A3V0JQ52_SALET
ParB	A0A3V3GZ07_SALMU
ParB	A0A3V4AJX3_SALET
ParB	A0A3V8K584_SALER
ParB	A0A3V8SEM4_SALSE
ParB	A0A3V9NSG9_SALGL
ParB	A0A3W4K5W4_ECOLX
ParB	A0A3W4K6Q2_ECOLX
ParB	A0A3Y8Z4D3_SALNE
ParB	A0A410J3H4_KLEPN
ParB	A0A421H480_KLEPN
ParB	A0A423XY32_9ENTR
ParB	A0A427KE51_ENTCL
ParB	A0A443UF39_ENTCL
ParB	A0A447KKE5_SEROD
ParB	A0A455WA19_9ENTR
ParB	A0A483K5G9_9ENTR
ParB	A0A485C5F8_KLUCR
ParB	A0A485D3H4_RAOPL
ParB	A0A485JND6_ECOLX
ParB	A0A499QSY3_9CAUD
ParB	A0A4D6P1A2_SALET
ParB	A0A4D9IHM0_ECOLX
ParB	A0A4P7Y1V9_SALET
ParB	A0A4Q1RPW3_9BACI
ParB	A0A4R0GGA6_9ENTR
ParB	A0A4S3N205_SHIFL
ParB	A0A4S5VBV7_KLEPN
ParB	A0A4U3ES92_9GAMM
ParB	A0A4U9DI72_RAOTE
ParB	A0A501RXE1_9GAMM
ParB	A0A506P818_9GAMM
ParB	A0A506QJP2_9GAMM
ParB	A0A509D4B3_9ENTR
ParB	A0A514V6V9_9ENTR
ParB	A0A518XI08_9GAMM
ParB	A0A564U9H2_ESCFE
ParB	A0A5A4SCU9_9ENTR
ParB	A0A5B8KS10_9ENTR
ParB	A0A5C2M4U3_SALER
ParB	A0A5C5CLP4_9ENTR
ParB	A0A5C5H9Y6_SALET
ParB	A0A5C7QSN3_9GAMM
ParB	A0A5F1EUZ8_9ESCH
ParB	A0A5F1HU47_9ESCH
ParB	A0A5F2KRW7_ECOLX
ParB	A0A5H6E390_SALET
ParB	A0A5H7AMM1_SALET
ParB	A0A5H7LHB7_SALMC
ParB	A0A5H8S2V3_SALET
ParB	A0A5I1M6K6_SALVI
ParB	A0A5M7LUF3_9GAMM
ParB	A0A5M7QRZ4_9GAMM
ParB	A0A5Q9LN35_9ENTR
ParB	A0A5R1YQI1_SALEN
ParB	A0A5T2L8Z6_SALER
ParB	A0A5T3RB75_SALER
ParB	A0A5T5T980_SALER
ParB	A0A5T7CEX6_SALEN
ParB	A0A5T7KLQ5_SALRU
ParB	A0A5T8WHK1_SALER
ParB	A0A5T9MYU7_SALER
ParB	A0A5U2LZE1_SALER
ParB	A0A5U2NUP4_SALER
ParB	A0A5U2VAK8_SALER
ParB	A0A5U3G606_SALET
ParB	A0A5U3R0N0_SALER
ParB	A0A5U5VA52_SALER
ParB	A0A5U7V3M5_SALER
ParB	A0A5U8K9M5_SALET
ParB	A0A5U8V6V4_SALTM
ParB	A0A5U9SRM0_SALET
ParB	A0A5U9XAW3_SALET
ParB	A0A5V0LCV7_SALER
ParB	A0A5V0QD53_SALER
ParB	A0A5V1ACH9_SALER
ParB	A0A5V1PNE4_SALER
ParB	A0A5V9HGP0_SALAN
ParB	A0A5W0LAD7_SALET
ParB	A0A5W0X636_SALTM
ParB	A0A5W1Z5K7_SALNE
ParB	A0A5W2DS29_SALMO
ParB	A0A5W6KQ25_SALTM
ParB	A0A5X0PEB3_SALTM
ParB	A0A5X1GKH9_SALET
ParB	A0A5X3R6M0_SALET
ParB	A0A5X4PLW8_SALET
ParB	A0A5X8YPU1_SALET
ParB	A0A5X9MRW8_SALTM
ParB	A0A5Y2SEC6_SALHO
ParB	A0A5Y3N4P2_SALER
ParB	A0A5Y3Q5H3_SALER
ParB	A0A5Y3V4E2_SALER
ParB	A0A5Y7A8G1_SALET
ParB	A0A5Z7N189_SALET
ParB	A0A5Z9MJA8_SALEN
ParB	A0A601R1X1_SALTM
ParB	A0A602KH76_SALEN
ParB	A0A609HDD9_SALDE
ParB	A0A610WWM6_SALDE
ParB	A0A618F0Y0_SALTM
ParB	A0A622TYR9_SALER
ParB	A0A625M9K5_SALTM
ParB	A0A625U1H1_SALNE
ParB	A0A626RF25_SALET
ParB	A0A627DT55_SALSE
ParB	A0A630VIX0_SALET
ParB	A0A632PYE9_SALIN
ParB	A0A633LFM6_SALER
ParB	A0A634N8H2_SALSE
ParB	A0A635FEM4_SALNE
ParB	A0A636K0S2_SALET
ParB	A0A637QPM1_SALIN
ParB	A0A653CKH6_CALMS
ParB	A0A653XP50_9GAMM
ParB	A0A656I8E8_SALE2
ParB	A0A659LM30_9ESCH
ParB	A0A663AP43_9ENTR
ParB	A0A6A5B825_9GAMM
ParB	A0A6B2F5R3_KLEPN
ParB	A0A6B9GEP4_PANCY
ParB	A0A6C7AVP4_SALTU
ParB	A0A6C7I6J8_SALTD
ParB	A0A6G6JX33_9GAMM
ParB	A0A6H0A4L1_SERMA
ParB	A0A6H3AWK8_9ENTR
ParB	A0A6I2J3C9_9ENTR
ParB	A0A6I2JTW0_9ENTR
ParB	A0A6I4V9U3_9GAMM
ParB	A0A6I6B097_9GAMM
ParB	A0A6J4DJR7_KLEPN
ParB	A0A6L5EFE9_9ENTR
ParB	A0A6M3HB72_KLEPN
ParB	A0A6M8UR51_9GAMM
ParB	A0A6M9XP96_STRCH
ParB	A0A6N4KLI6_ECOLX
ParB	A0A6P1VA47_9ENTR
ParB	A0A6S4YEV0_RAOOR
ParB	A0A6Y0J1Z4_SALEN
ParB	A0A6Y0P9H6_SALEN
ParB	A0A6Y0UDV5_SALEN
ParB	A0A6Y1QUQ5_SALDZ
ParB	A0A6Y2I3N0_SALET
ParB	A0A6Y4JT05_SALET
ParB	A0A6Y4KBV2_SALEN
ParB	A0A701LKF0_SALTM
ParB	A0A701UZX1_SALER
ParB	A0A702B329_SALET
ParB	A0A703D9H8_SALER
ParB	A0A703G481_SALER
ParB	A0A704CBB2_SALEN
ParB	A0A704M1Y2_SALEN
ParB	A0A708TLP3_SALTM
ParB	A0A709PE38_SALTM
ParB	A0A711E7B3_SALET
ParB	A0A718LAY5_SALTS
ParB	A0A718S4H0_SALTS
ParB	A0A719A4H8_SALTS
ParB	A0A720VKN2_SALTI
ParB	A0A721I7Q4_SALER
ParB	A0A721PNL9_SALER
ParB	A0A724J998_SALEP
ParB	A0A725FB58_SALEN
ParB	A0A725JQ61_SALEN
ParB	A0A725X3N7_SALEN
ParB	A0A725XJ59_SALEN
ParB	A0A726ZUG5_SALDZ
ParB	A0A727QC55_SALER
ParB	A0A729X6N0_SALER
ParB	A0A729XGK6_SALER
ParB	A0A730K8H3_SALHO
ParB	A0A730U4G7_SALET
ParB	A0A731UWI1_SALET
ParB	A0A731YGS4_SALET
ParB	A0A734KN42_SALER
ParB	A0A734PAJ2_SALER
ParB	A0A734ZYC2_SALEN
ParB	A0A736I1C1_SALHO
ParB	A0A736UFB3_SALET
ParB	A0A737I9Z5_SALET
ParB	A0A737M839_SALHO
ParB	A0A738AK07_SALAE
ParB	A0A738S0W7_SALER
ParB	A0A739CVY1_SALET
ParB	A0A739L5Y6_SALER
ParB	A0A741CTV7_SALER
ParB	A0A741EH69_SALER
ParB	A0A741KT48_SALER
ParB	A0A741L3R4_SALER
ParB	A0A741NJR0_SALER
ParB	A0A741SI78_SALER
ParB	A0A742A0Y1_SALER
ParB	A0A747XMP4_SALER
ParB	A0A749FV92_SALER
ParB	A0A750IXQ1_SALER
ParB	A0A752T639_SALER
ParB	A0A754YNT5_SALER
ParB	A0A756B7M2_SALER
ParB	A0A756ERH3_SALER
ParB	A0A756PMW4_SALER
ParB	A0A756YGG5_SALER
ParB	A0A757CU57_SALER
ParB	A0A757JQ32_SALER
ParB	A0A759UPD0_SALER
ParB	A0A760ESR0_SALER
ParB	A0A760JJJ7_SALER
ParB	A0A760RRI1_SALER
ParB	A0A763MMC9_SALER
ParB	A0A763STK5_SALER
ParB	A0A764BEI1_SALER
ParB	A0A765EBY0_SALER
ParB	A0A765L1D2_SALER
ParB	A0A7A6TMI0_ECOLX
ParB	A0A7B4T2H0_ECOLX
ParB	A0A7H0EV03_KLEVA
ParB	A0A7H0ML60_9ENTR
ParB	A0A7H4N4B3_KLEVA
ParB	A0A7I0DYE0_KLEPN
ParB	A0A7I6YE99_9ENTR
ParB	A0A7U2H4T7_ECOLX
ParB	A0A7U4Q3K6_9GAMM
ParB	A0A7U9GWI2_KLEPN
ParB	A0A7U9NXU3_ECOLX
ParB	A0A7V7UU33_CROSK
ParB	A0A7V8NBE5_9GAMM
ParB	A0A7W4KPE4_9ESCH
ParB	A0A7X0T0A2_9GAMM
ParB	A0A7X2SXR4_ENTAG
ParB	A0A7X3SBN3_9GAMM
ParB	A0A7Y7VLP5_9GAMM
ParB	A0A7Y8XS48_SERFO
ParB	A0A7Y8YGE2_9GAMM
ParB	A0A7Z0I948_9GAMM
ParB	A0A7Z1D5J7_SHISO
ParB	A0A7Z1Y7F4_9GAMM
ParB	A0A7Z2H4N4_9GAMM
ParB	A0A822PPE5_SHIFL
ParB	A0A826SN90_ECOLX
ParB	A0A827LN59_ECOLX
ParB	A0A828GN38_ECOLX
ParB	A0A829CJ64_ECOLX
ParB	A0A830ZDJ1_9ENTR
ParB	A0A837FUK3_9GAMM
ParB	A0A839C076_9ENTR
ParB	A0A855WW33_CROSK
ParB	A0A855YWX5_9GAMM
ParB	A0A859RED0_9ENTR
ParB	A0A896Z9L8_SHIFL
ParB	A0A8A4K6G4_PANAN
ParB	A0A8A9FVL1_KLEPN
ParB	A0A8B4U105_9ENTR
ParB	A0A8D6S093_RAOOR
ParB	A0A8E1RX33_9GAMM
ParB	A0A8E5U4T1_9ENTR
ParB	A0A8E5UBZ3_9ENTR
ParB	A0A8E7D052_SALNE
ParB	A0A8E7P4M9_SALMU
ParB	A0A8E7S6M2_SALRU
ParB	A0A8E7SDW0_SALER
ParB	A0A8E7W038_SALER
ParB	A0A8E8FTH6_KLEPN
ParB	A0A8E9Y025_SALER
ParB	A0A8F2UWL6_SALET
ParB	A0A8F6S437_SALET
ParB	A0A8F7MTS2_9ENTR
ParB	A0A8F7TW68_KLEVA
ParB	A0A8F9HF10_9ESCH
ParB	A0A8F9I9Q6_ECOLX
ParB	A0A8G1Q072_PANAN
ParB	A0A8G2AHX2_9ENTR
ParB	A0A8S7B606_ECOLX
ParB	A0A8S7EQK7_ECOLX
ParB	A0A8S7GRH3_ECOLX
ParB	A0A8S7IQV0_ECOLX
ParB	A0A8S7PL06_ECOLX
ParB	A0A8T6PZN9_ECOLX
ParB	A0A8T7R9M8_KLEPN
ParB	A0A8X8DUI9_9GAMM
ParB	A0A8X8RBJ2_ECOLX
ParB	A6TJ31_KLEP7
ParB	A7MRK8_CROS8
ParB	A9QNS5_SALET
ParB	B2TSP7_SHIB3
ParB	B2VB65_ERWT9
ParB	B5RKQ2_KLEP3
ParB	B7L3W8_ESCF3
ParB	C0Q8L6_SALPC
ParB	C9Y5K2_CROTZ
ParB	D2AJ81_SHIF2
ParB	D4E9W5_SEROD
ParB	D4GFN5_PANAM
ParB	D6YRG6_PANVC
ParB	D7EZP3_KLEPN
ParB	D8L2L1_KLEPN
ParB	E0LSB9_9GAMM
ParB	E2X5A3_SHIDY
ParB	E5FD49_KLEPN
ParB	E6WJR2_PANSA
ParB	E8XLH9_SALT4
ParB	F0JYE4_ESCFE
ParB	F4SY06_ECOLX
ParB	G5NMK1_SALET
ParB	G5QKW0_SALRU
ParB	G5S5K6_SALET
ParB	G9CAD8_SALTM
ParB	H3RKG7_PANSE
ParB	H9AC61_SALEN
ParB	H9ACH5_SALPU
ParB	H9L4G2_SALTM
ParB	I2UJK1_ECOLX
ParB	I4T1G5_ECOLX
ParB	J2DES8_KLEPN
ParB	J2M3X5_9GAMM
ParB	J3HE67_9GAMM
ParB	J6HYL3_9ENTR
ParB	K0GYN8_PROST
ParB	K4VTW2_ECOLX
ParB	K8A8E5_9ENTR
ParB	K8B3G5_9ENTR
ParB	K8BBE9_9ENTR
ParB	Q0QCC8_KLEPN
ParB	Q2ET32_ECOLX
ParB	Q2ET37_SHIDY
ParB	Q2ET38_SHIDY
ParB	Q2ET41_SHIDY
ParB	Q2ET42_SHIDY
ParB	Q2ET49_SHIFL
ParB	Q2ET62_SHIBO
ParB	Q31SP2_SHIBS
ParB	Q327G3_SHIDS
ParB	Q38407_BPP1Z
ParB	Q38420_BPP1Z
ParB	Q3YTW0_SHISS
ParB	Q4L1Q5_SALDU
ParB	Q5J492_SALCH
ParB	Q71TB0_BPP1
ParB	Q71TM0_BPP1
ParB	Q76VY9_BPP1Z
ParB	Q7BEG4_SHIFM
ParB	Q93GQ7_SALTY
ParB	Q99QN9_SHIFL
ParB	Q9EUI9_SALET
ParB	R4WBQ6_KLEPN
ParB	R9R6W9_KLEPN
ParB	S5NNV3_SALBN
ParB	U9YH13_ECOLX
ParB	U9YSJ9_ECOLX
ParB	U9ZSB8_ECOLX
ParB	V0AGL4_ECOLX
ParB	V5U5T4_9ENTR
ParB	V5Z2S8_9GAMM
ParB	W1F2T6_ECOLX
ParB	W8QST3_KLEPN
ParG	Q9KJ82_SALNE
ParG	A0A060RIR1_ECOLX
ParG	A0A068Z196_9GAMM
ParG	A0A0F5PHW8_CITFR
ParG	A0A0F7JHC1_SALTM
ParG	A0A0F8GEA6_METMZ
ParG	A0A0T9MZG7_YERIN
ParG	A0A0T9V3P8_YERFR
ParG	A0A0U5LAG3_9GAMM
ParG	A0A127STP7_9BACT
ParG	A0A140WY13_ECOLX
ParG	A0A1E7Z1D1_9GAMM
ParG	A0A1J7ZG68_CITFR
ParG	A0A1L4BM06_SALTI
ParG	A0A208ZZA2_YERIN
ParG	A0A249E094_9ENTR
ParG	A0A256DKS6_CITFR
ParG	A0A286DSQ2_9ENTR
ParG	A0A2A2M6N9_9GAMM
ParG	A0A2C5V9P6_RAOPL
ParG	A0A2D0AQM3_9GAMM
ParG	A0A2D0JZC8_9GAMM
ParG	A0A2D3SXT2_9ENTR
ParG	A0A2G8CHD0_9GAMM
ParG	A0A2H4YPM9_SALNE
ParG	A0A2H4ZGP4_RAOOR
ParG	A0A2J4YZR8_9ENTR
ParG	A0A2J4ZT62_9ENTR
ParG	A0A2M9WE52_9GAMM
ParG	A0A2N5DT03_9GAMM
ParG	A0A2R4NE71_KLEPN
ParG	A0A2T7B0L1_9ENTR
ParG	A0A370VB28_9ESCH
ParG	A0A377TES3_HAFAL
ParG	A0A378CHU6_KLEPN
ParG	A0A379SDY8_SALER
ParG	A0A379SQU7_SALER
ParG	A0A3E2KL72_9ENTR
ParG	A0A3G2I8P2_9ENTR
ParG	A0A3I8FT25_SALER
ParG	A0A3V3BFS0_SALET
ParG	A0A3Y2VQT4_SALET
ParG	A0A3Y4EGJ0_SALET
ParG	A0A3Y7NF85_SALEN
ParG	A0A418GBL5_ECOLX
ParG	A0A421H440_KLEPN
ParG	A0A455K5H6_SALET
ParG	A0A4V2HP00_SALET
ParG	A0A564UU00_ESCFE
ParG	A0A5B0K3Z2_9ENTR
ParG	A0A5H7LJN4_SALMC
ParG	A0A5H7WR60_SALET
ParG	A0A5I1CIY8_SALET
ParG	A0A5J1ECU3_SALET
ParG	A0A5J6V9J6_SALPU
ParG	A0A5U4CX61_SALER
ParG	A0A5V0T1B6_SALER
ParG	A0A5W0SA84_SALTM
ParG	A0A5W1SNT4_SALIN
ParG	A0A5W1Z6P0_SALNE
ParG	A0A5W8MM44_SALET
ParG	A0A5W9WCI8_SALET
ParG	A0A5Y1YFQ4_SALDZ
ParG	A0A5Y2SEC3_SALHO
ParG	A0A5Y3V3J3_SALER
ParG	A0A5Y4J8J8_SALER
ParG	A0A5Z6EMP4_SALTM
ParG	A0A5Z7ILQ0_SALET
ParG	A0A600UXS5_SALET
ParG	A0A607IDF9_SALET
ParG	A0A635CNC9_SALTM
ParG	A0A656YGR4_SALNE
ParG	A0A6C6ZT31_SALDC
ParG	A0A6H2GRH9_9ESCH
ParG	A0A6I6B0N0_9GAMM
ParG	A0A6L6IPD5_9ESCH
ParG	A0A6L6YE76_9ENTR
ParG	A0A6L7EX36_9ENTR
ParG	A0A6M4NRP8_9ENTR
ParG	A0A6S5KKH3_ENTCL
ParG	A0A6X7QRD4_SALEN
ParG	A0A6Y2JYG0_SALDZ
ParG	A0A6Y4QF27_SALTM
ParG	A0A6Y6LMS2_SALTI
ParG	A0A707Z3H0_SALTM
ParG	A0A719DES0_SALTS
ParG	A0A729G2R7_SALHO
ParG	A0A729YHM1_SALET
ParG	A0A735V3Z8_SALER
ParG	A0A736REM2_SALHO
ParG	A0A744EN56_SALER
ParG	A0A746HZZ8_SALER
ParG	A0A748E464_SALTI
ParG	A0A748WXR2_SALER
ParG	A0A751JTL8_SALPT
ParG	A0A754BCT5_SALER
ParG	A0A756IHF2_SALER
ParG	A0A759WKK8_SALER
ParG	A0A7D6FDR5_KLEPN
ParG	A0A7D6KCA2_9ENTR
ParG	A0A7D6U730_9ENTR
ParG	A0A7H0VXQ3_SALET
ParG	A0A7H1KPF7_SALET
ParG	A0A7H9K129_ENTCL
ParG	A0A7L6INR4_9ENTR
ParG	A0A7L7J016_9ENTR
ParG	A0A7U4K352_YEREN
ParG	A0A7U8WZ84_9ESCH
ParG	A0A7U9IF21_9GAMM
ParG	A0A7V7RFB5_CROSK
ParG	A0A7Z1CYF7_SHISO
ParG	A0A7Z1HNF1_SALDU
ParG	A0A831A502_ERWAM
ParG	A0A851G9F0_9ENTR
ParG	A0A873AVY4_9ENTR
ParG	A0A8B4U4H3_9ENTR
ParG	A0A8E5UC05_9ENTR
ParG	A0A8E6P103_KLESP
ParG	A0A8E6P1I6_9ENTR
ParG	A0A8E6P2W7_9ESCH
ParG	A0A8F5TMZ6_MORMO
ParG	A0A8I0HX73_ENTAG
ParG	A0A8I0HZ90_ENTAG
ParG	A0A8I0KIL0_9ENTR
ParG	A0A8I0QQA0_9ENTR
ParG	A0A8J7KXB6_9ENTR
ParG	A0A8S7E8M9_ECOLX
ParG	A0A8X6ER07_SALDU
ParG	A9LK87_SALEN
ParG	B0EYM2_ECOLX
ParG	B0ZE05_ECOLX
ParG	B1MUC0_SALDU
ParG	B2CBF1_KLEPN
ParG	B7UF62_YERPU
ParG	C4K638_HAMD5
ParG	C9Y5R7_CROTZ
ParG	D0QML3_ECOLX
ParG	D4I4P5_ERWAC
ParG	E5YNK1_9ENTR
ParG	E6WMF1_PANSA
ParG	F0JY99_ESCFE
ParG	G3CA69_MORMO
ParG	G3CAG9_9ENTR
ParG	G3CAS3_9ENTR
ParG	H3RLY1_PANSE
ParG	J5UN29_9ENTR
ParG	M7RET1_SALDU
ParG	Q70W75_YEREN
ParG	Q9F809_ERWAM
ParG	R4IT59_KLEPN
ParG	V5U7C5_9ENTR
ParM	PARM_ECOLX
ParM	A0A060VEN5_KLEPN
ParM	A0A060VGN2_KLEPN
ParM	A0A075MAR5_ECOLX
ParM	A0A078LRS9_CITKO
ParM	A0A080HQV4_ECOLX
ParM	A0A085NWB5_ECOLX
ParM	A0A086IC45_KLEPN
ParM	A0A087FTQ3_KLEVA
ParM	A0A0C5PP95_SHIFL
ParM	A0A0F0YQF3_KLEAE
ParM	A0A0F7JH69_SALTM
ParM	A0A0G3Q2J6_9ENTR
ParM	A0A0H3FPQ5_KLEAK
ParM	A0A0H3GQD3_KLEPH
ParM	A0A0J8VKR8_9ENTR
ParM	A0A0J9B3H6_9GAMM
ParM	A0A0P7PPC6_ECOLX
ParM	A0A0P8KA26_CITFR
ParM	A0A0S4G9S8_KLEPN
ParM	A0A131HLP1_SHISO
ParM	A0A140JYU4_ECOLX
ParM	A0A142CQG3_ECOLX
ParM	A0A156HXD9_9ENTR
ParM	A0A168QAY9_CITFR
ParM	A0A170TU73_ECOLX
ParM	A0A1B1LQ06_KLEPN
ParM	A0A1B8SMD4_PRORE
ParM	A0A1C0Y1D9_ECOLX
ParM	A0A1C1EKJ1_9ENTR
ParM	A0A1E7Z499_9GAMM
ParM	A0A1F2M2R7_9ENTR
ParM	A0A1V0LFX1_9ENTR
ParM	A0A1X3HXE6_ECOLX
ParM	A0A1X3I3E7_ECOLX
ParM	A0A1X3IC40_ECOLX
ParM	A0A1X3M1M7_ECOLX
ParM	A0A1X7BDD4_ECOLX
ParM	A0A222YXF2_9CAUD
ParM	A0A223UHB1_9ENTR
ParM	A0A2A3VQS8_ECOLX
ParM	A0A2G8D0F4_9GAMM
ParM	A0A2H4ZFY2_9BACT
ParM	A0A2I8QGH6_9ENTR
ParM	A0A2K1Q4L3_9GAMM
ParM	A0A2L1KUD1_PROMI
ParM	A0A2N4VI06_9ENTR
ParM	A0A2N4YT00_KLEVA
ParM	A0A2N4YZB0_KLEVA
ParM	A0A2N5A414_KLEVA
ParM	A0A2N5DT96_9GAMM
ParM	A0A2P1BQ24_9GAMM
ParM	A0A2R4AAG9_ECOLX
ParM	A0A2R4NHJ6_ECOLX
ParM	A0A2S0VEA4_9ENTR
ParM	A0A2S1PMR3_EDWTA
ParM	A0A2S5CDN8_9ENTR
ParM	A0A2S6K5L7_KLEPN
ParM	A0A2S8JYJ9_ECOLX
ParM	A0A2U3ESA3_9ENTR
ParM	A0A2U3EV67_9ENTR
ParM	A0A2U3EX74_9ENTR
ParM	A0A2U3F2Z8_9ENTR
ParM	A0A2W8G6Q5_ECOLX
ParM	A0A2W8GDE1_ECOLX
ParM	A0A2W8GFQ7_ECOLX
ParM	A0A2W8GJ64_ECOLX
ParM	A0A2W8HBV2_ECOLX
ParM	A0A2X1LCC6_ECOLX
ParM	A0A2X3CMP8_KLEPN
ParM	A0A2X3CSU1_KLEPN
ParM	A0A2X3LJW9_ECOLX
ParM	A0A2X5TMH9_ECOLX
ParM	A0A2X6S738_ECOLX
ParM	A0A2Z0MW37_KLEPN
ParM	A0A2Z3XI28_9ENTR
ParM	A0A348DML5_9ENTR
ParM	A0A377EBL7_ECOLX
ParM	A0A377HEX3_ECOLX
ParM	A0A377UTT0_KLEPN
ParM	A0A377WDH1_KLEPN
ParM	A0A377XIF3_KLEPN
ParM	A0A377YBK4_KLEPN
ParM	A0A377YVL4_KLEPO
ParM	A0A378AXA6_KLEPO
ParM	A0A378E808_KLEPR
ParM	A0A378FSB7_KLEPN
ParM	A0A3A6RQM0_ECOLX
ParM	A0A3F3BV85_KLEPN
ParM	A0A3K5K7L3_SALER
ParM	A0A3P1X0F8_ECOLX
ParM	A0A3P5HE05_ECOLX
ParM	A0A3Q8DKI9_MORMO
ParM	A0A3Q9UAR0_9ENTR
ParM	A0A3R0JPJ7_SHIDY
ParM	A0A3R8VUA1_PRORE
ParM	A0A3R9ANU8_ENTCL
ParM	A0A3S4MQB7_KLEAE
ParM	A0A3S7TGR2_9GAMM
ParM	A0A3S8XB42_SALDE
ParM	A0A3T2UWN6_SHIFL
ParM	A0A3W0AZT4_SALDE
ParM	A0A3Z2TVN3_ECOLX
ParM	A0A3Z6CGS6_SALET
ParM	A0A410J3D3_KLEPN
ParM	A0A483IP64_KLEPN
ParM	A0A4P0XQU5_KLEPN
ParM	A0A4P6WHC2_9ENTR
ParM	A0A4P7L6S8_9GAMM
ParM	A0A4P7L790_9GAMM
ParM	A0A4P7LA86_9GAMM
ParM	A0A4Q0DKM8_ECOLX
ParM	A0A4R2XQ05_RAOOR
ParM	A0A4S4TL59_KLEPN
ParM	A0A4V2W6J6_9ENTR
ParM	A0A4V4UWJ6_ECOLX
ParM	A0A4Y1YQR8_ECOLX
ParM	A0A542BFH9_SERFO
ParM	A0A5B8HR47_9GAMM
ParM	A0A5B9AGS0_ECOLX
ParM	A0A5C7BCF2_SERMA
ParM	A0A5C7CLQ4_SERMA
ParM	A0A5C7CRC7_SERMA
ParM	A0A5F1HUZ0_9ESCH
ParM	A0A5F1PML5_ECOLX
ParM	A0A5F1Q1K7_ECOLX
ParM	A0A5F1Q2H2_ECOLX
ParM	A0A5F1Q363_ECOLX
ParM	A0A5F1Q370_ECOLX
ParM	A0A5F1Q3E5_ECOLX
ParM	A0A5F1Q582_ECOLX
ParM	A0A5I8GDB4_SALET
ParM	A0A5J1LZG6_SALVI
ParM	A0A5T5ADV5_SALER
ParM	A0A5T7HL80_SALMO
ParM	A0A5U1RBI0_SALER
ParM	A0A5U6CH52_SALER
ParM	A0A5U9BVM9_SALET
ParM	A0A5V6D8I8_SALEN
ParM	A0A5X2B0R6_SALET
ParM	A0A5X9W9N1_SALET
ParM	A0A5Y2NTJ5_SALTM
ParM	A0A5Y2SEA2_SALHO
ParM	A0A5Y4VIJ9_SALTM
ParM	A0A5Z9VLG9_SALET
ParM	A0A608QKD3_SALTH
ParM	A0A612GMS3_SALET
ParM	A0A628KIF4_SALEN
ParM	A0A629I8V5_SALER
ParM	A0A631VB52_SALDE
ParM	A0A633RFS1_SALER
ParM	A0A636K170_SALET
ParM	A0A637A8D2_SALTM
ParM	A0A653D5F8_CALMS
ParM	A0A654DK01_9GAMM
ParM	A0A659PWC8_SALET
ParM	A0A6G6SQ30_PROVU
ParM	A0A6G6TMC6_9GAMM
ParM	A0A6H0A400_9ENTR
ParM	A0A6H0A6B5_KLEPN
ParM	A0A6H3E7H4_ACIBA
ParM	A0A6P1Q5X1_9GAMM
ParM	A0A6S4YDD1_RAOOR
ParM	A0A6S5XW16_ENTCL
ParM	A0A6W0H5L5_SALET
ParM	A0A6X7K8T0_SALET
ParM	A0A6Y2VWP4_SALET
ParM	A0A6Y2ZWI8_SALVI
ParM	A0A6Y6HQ06_SALER
ParM	A0A709WFD3_SALTM
ParM	A0A717FCZ5_SALTI
ParM	A0A719EAR6_SALTS
ParM	A0A730ECB1_SALON
ParM	A0A730UZ96_SALET
ParM	A0A731C8B6_SALON
ParM	A0A731YHP7_SALET
ParM	A0A734C119_SALET
ParM	A0A741AM51_SALTM
ParM	A0A758BWB4_SALER
ParM	A0A759BFJ9_SALER
ParM	A0A760CDP7_SALER
ParM	A0A7C0FKD5_ECOLX
ParM	A0A7D6YG40_9ENTR
ParM	A0A7G8AFT9_9ENTR
ParM	A0A7I0L291_ECOLX
ParM	A0A7I8HSZ8_9ENTR
ParM	A0A7U2ZQS0_9ENTR
ParM	A0A7U7F0F8_KLEPN
ParM	A0A7U8Y214_9ESCH
ParM	A0A7U9D392_KLEPN
ParM	A0A7U9DIL9_9ESCH
ParM	A0A7V7TYD2_CROSK
ParM	A0A7W2VC74_9ENTR
ParM	A0A7W3AN70_9ESCH
ParM	A0A7Y7EBC7_STRMO
ParM	A0A7Y8XRK4_SERFO
ParM	A0A827Q765_ECOLX
ParM	A0A827Y3J3_ECOLX
ParM	A0A828A8Y5_ECOLX
ParM	A0A828AAR3_ECOLX
ParM	A0A828BT87_ECOLX
ParM	A0A829CJ33_ECOLX
ParM	A0A829E135_ECOLX
ParM	A0A829IUF4_ECOLX
ParM	A0A837JPN1_KLEAE
ParM	A0A839BL16_9ESCH
ParM	A0A873ALW3_9ENTR
ParM	A0A896Z6D6_SHIFL
ParM	A0A8A6WAI2_KLEPN
ParM	A0A8B5QFF3_9ENTR
ParM	A0A8D5CM90_SALET
ParM	A0A8D5XH59_9ENTR
ParM	A0A8E0G0I9_ECOLX
ParM	A0A8E5U032_9ENTR
ParM	A0A8F4JJ04_9ENTR
ParM	A0A8F6ZK65_KLEPN
ParM	A0A8G1PMG9_ECOLX
ParM	A0A8H0QKB9_ECOLX
ParM	A0A8H8Z8N5_SHIFL
ParM	A0A8H9VXG7_ECOLX
ParM	A0A8H9ZT14_9ENTR
ParM	A0A8H9ZZM7_9ENTR
ParM	A0A8S5SKX4_9CAUD
ParM	A0A8S7IAK6_ECOLX
ParM	A0A8S7IDM4_ECOLX
ParM	A0A8S7NWZ4_ECOLX
ParM	A0A8S7X340_ECOLX
ParM	A0A8S7YH21_ECOLX
ParM	A0A8T7RKV7_KLEPN
ParM	A6TH28_KLEP7
ParM	A7ZGK8_ECO24
ParM	B5Y390_KLEP3
ParM	D0Z6S1_ECOH1
ParM	D2D992_KLEPN
ParM	D2U5R2_SHISO
ParM	D3H5F7_ECO44
ParM	D7GKE8_ECOLX
ParM	D9Z4Y6_ECOLX
ParM	E2GHH1_ECOLX
ParM	E9TEW2_ECOLX
ParM	F4SZJ0_ECOLX
ParM	F4V520_ECOLX
ParM	H1ZXM4_ECOLX
ParM	I1WZV8_ECOLX
ParM	I2UHY4_ECOLX
ParM	J2LXK9_KLEPN
ParM	K4P5X4_9BACT
ParM	K4VHC1_ECOLX
ParM	K4VTF9_ECOLX
ParM	K4WGD4_ECOLX
ParM	K8CGY3_CROSK
ParM	K8DE42_CROSK
ParM	Q6SJ56_ECOLX
ParM	Q7AK90_SHIFL
ParM	R4Y7Y4_KLEPR
ParM	R9S6Y5_KLEPN
ParM	S1DZA5_ECOLX
ParM	S1NH01_ECOLX
ParM	U5N331_PRORE
ParM	V0AX52_KLEPN
ParM	V0YDG8_ECOLX
ParM	V0Z4P1_ECOLX
ParM	V0ZVE1_ECOLX
ParM	W0BUI0_9ENTR
ParM	W0BUK3_9ENTR
ParM	W0BV86_9ENTR
ParM	W0FTC7_ECOLX
ParM	W1ESI0_KLEPN
ParM	W1HSP5_KLEPN
ParM	W8UPP3_KLEPN
ParM	W9BED0_KLEPN
ParR	A0A0C5BVQ8_STAAU
ParR	A0A0D4ZYK6_STAEP
ParR	A0A0H2XKQ4_STAA3
ParR	A0A0K0ME10_9STAP
ParR	A0A0N9NJL4_STAPS
ParR	A0A0U2CJ65_STAEP
ParR	A0A133QXU6_STASI
ParR	A0A141BHY3_STAXY
ParR	A0A141HMK9_STAA8
ParR	A0A1B1UXS0_STALU
ParR	A0A1S7BGJ1_STAAU
ParR	A0A418HED5_STAGA
ParR	A0A507SJ94_9STAP
ParR	A0A6N0I4W4_STAHO
ParR	A0A7G3L2E1_STAAU
ParR	A0A7G3T6L6_9STAP
ParR	A0A848F022_STACP
ParR	E4PYH1_STAAU
ParR	E4PYH2_STAAU
ParR	O87365_STAAU
sopB	SOPB_ECOLI
sopB	SOPB_ECO57
sopB	A0A090KKU2_9BACT
sopB	A0A0E1M5W1_ECOLX
sopB	A0A0H3PHR7_ECO5C
sopB	A0A142CLF4_SHIDY
sopB	A0A150I2R7_9GAMM
sopB	A0A1B6NTF0_9ZZZZ
sopB	A0A1D3LCA7_PLACH
sopB	A0A1X0YIB6_ECOLX
sopB	A0A1X0YIP3_ECOLX
sopB	A0A200H0B6_9ACTN
sopB	A0A2Z6FAY3_ECO57
sopB	A0A3P5HBQ1_ECOLX
sopB	A0A3V9J4P0_SALTM
sopB	A0A4Q2QSK4_9ENTR
sopB	A0A5W3A7Y3_SALHA
sopB	A0A6M9XM53_STRCH
sopB	A0A711IR30_SALET
sopB	A0A745NVA9_SALER
sopB	A0A7A6R0D7_ECOLX
sopB	A0A7G8ZY67_MUHV1
sopB	A0A7G9YNB9_9EURY
sopB	A0A7L9QCE1_9ZZZZ
sopB	A0A7T7DHK5_RHCM6
sopB	A0A7T7DHY5_9BETA
sopB	A0A7T7IKN4_9BETA
sopB	A0A7U9BHA7_ECOLX
sopB	A0A7Z1EPZ2_SHIFL
sopB	A0A7Z1KKT5_SALDU
sopB	A0A829CRK5_ECOLX
sopB	A0A854FBK7_9GAMM
sopB	A0A891SUD1_ECOLX
sopB	A0A8I0NHP1_ECOLX
sopB	A0A8T5Z4J9_ECOLX
sopB	A0A8T5Z4N6_ECOLX
sopB	A0A8T6A5R2_ECOLX
sopB	A7ZH40_ECO24
sopB	C5ZZH6_ECOLX
sopB	D2K3X4_HCMV
sopB	D7GKM2_ECOLX
sopB	D8EDF0_ECOLX
sopB	H9TJ78_SALET
sopB	I3WF22_9BETA
sopB	M4FJ19_BRARP
sopB	Q799C4_ECOLX
sopB	R8AQY1_PLESH
sopB	V0YUL3_ECOLX
sopB	X0S7W0_9ZZZZ
sopB	X0UKV0_9ZZZZ
sopB	X1B8B1_9ZZZZ
sopB	X1BF07_9ZZZZ
sopB	X1DZ99_9ZZZZ
sopB	X1K4G0_9ZZZZ
sopB	X1MIT9_9ZZZZ
TubR	A0A0D0NUP4_9BACI
TubR	A0A0F6FIE8_BACTK
TubR	A0A231HSV2_BACTU
TubR	A0A242Y751_BACTU
TubR	A0A243A2K8_BACTU
TubR	A0A243AXV4_BACTU
TubR	A0A243E8F3_BACTU
TubR	A0A243JIY0_BACTU
TubR	A0A243P0L5_BACTV
TubR	A0A2A7GH35_BACTU
TubR	A0A369CP30_9BACI
TubR	A0A433LVA0_9BACI
TubR	A0A454M5G2_BACTU
TubR	A0A4E7PZM4_BACTI
TubR	A0A5C1FPV3_9BACI
TubR	A0A7V7LK88_9BACI
TubR	A0A806I041_BACTU
TubR	J3ZXZ2_BACTU
TubR	J8EAN5_BACC6
TubR	M1PWS2_BACTU
TubR	R8MB10_BACCE

## Sheet: Psi
Plasmid SOS Inhibition Proteins	Protein ID			Sequences obtained through UniRef50 cluster of each protein in the first column
psiA	A0A075MBM9_ECOLX
psiA	A0A075UKJ9_ECOLX
psiA	A0A0D8W9I8_ECOLX
psiA	A0A0E0Y8E4_ECO1C
psiA	A0A0E2KX40_ECOU3
psiA	A0A0F6WG04_ECOLX
psiA	A0A0G3B3R0_ECOLX
psiA	A0A0H3P049_SALTS
psiA	A0A0I3ERP0_SHISO
psiA	A0A0K2CST8_KLEPN
psiA	A0A0S0ZQ27_SALEN
psiA	A0A140JYK7_ECOLX
psiA	A0A140WYY0_ECOLX
psiA	A0A142CMB0_SHIDY
psiA	A0A142CNC1_SHIDY
psiA	A0A163C8J1_ECOLX
psiA	A0A1C8HJ60_SALER
psiA	A0A1M0CWB0_ECOLX
psiA	A0A1S7B037_SALAN
psiA	A0A1S9ISE5_SHIBO
psiA	A0A1X3ISU5_ECOLX
psiA	A0A1X3KUP0_ECOLX
psiA	A0A220QI23_ECOLX
psiA	A0A220QJR9_ECOLX
psiA	A0A220SXI1_ECOLX
psiA	A0A244B904_ECOLX
psiA	A0A2J0RAF8_SALTM
psiA	A0A2J7KRL7_ECOLX
psiA	A0A2L1KL18_ECOLX
psiA	A0A2L1KL50_KLEPN
psiA	A0A2N5XEQ1_9ACTN
psiA	A0A2P9EGG4_ECOLX
psiA	A0A2S1J6U1_ECOLX
psiA	A0A2S1J953_ECOLX
psiA	A0A2X2JD17_SHIBO
psiA	A0A2Y0TY21_ECOLX
psiA	A0A314LID8_ECOLX
psiA	A0A376C487_CITKO
psiA	A0A3A6RK49_ECOLX
psiA	A0A3A6S9X8_ECOLX
psiA	A0A3G2C974_SALSP
psiA	A0A3G8EY16_SALET
psiA	A0A3K0WIV3_ECOLX
psiA	A0A3Q0N5L4_ECOLX
psiA	A0A3Q0PML7_ECOLX
psiA	A0A3Q8VPD7_SALDE
psiA	A0A3R0IDC1_SALET
psiA	A0A3R0JPZ5_SHIDY
psiA	A0A3S5YG57_SALER
psiA	A0A3T5APV2_SALET
psiA	A0A3U5NE98_SALET
psiA	A0A3U9HVN8_SALIN
psiA	A0A3V0X1B1_SALET
psiA	A0A3V0Y5K3_ECOLX
psiA	A0A3V7I2Z0_SALEN
psiA	A0A3W5Y7M3_ECOLX
psiA	A0A3Y8PK69_SALVI
psiA	A0A3Z3GE69_SALET
psiA	A0A3Z4V216_SALET
psiA	A0A4D6VLP5_ECOLX
psiA	A0A4U7PK02_SALET
psiA	A0A4Z0J597_ECOLX
psiA	A0A4Z0J5L3_ECOLX
psiA	A0A4Z0J6E0_ECOLX
psiA	A0A4Z0JD61_ECOLX
psiA	A0A4Z0JDU9_ECOLX
psiA	A0A5A4LZD5_SALTI
psiA	A0A5C9AJU5_ECOLX
psiA	A0A5C9ARH8_ECOLX
psiA	A0A5H3UNG0_SALET
psiA	A0A5H6T0J3_SALON
psiA	A0A5H6ZAV0_SALET
psiA	A0A5Q7DT16_SALMO
psiA	A0A5T3QC97_SALER
psiA	A0A5T4QIZ7_SALER
psiA	A0A5T4QJ20_SALER
psiA	A0A5T7DL82_SALET
psiA	A0A5U0DGX0_SALET
psiA	A0A5U0HEZ1_SALER
psiA	A0A5U8QWY0_SALET
psiA	A0A5U8RJG8_SALNE
psiA	A0A5U8SSS0_SALET
psiA	A0A5V0FC19_SALAB
psiA	A0A5V0FM20_SALNE
psiA	A0A5V1MNJ6_SALER
psiA	A0A5V7ENY0_SALET
psiA	A0A5V7ZQG0_SALET
psiA	A0A5V8WG21_SALTM
psiA	A0A5V9D463_SALET
psiA	A0A5V9F200_SALET
psiA	A0A5V9H286_SALAN
psiA	A0A5V9UW65_SALHA
psiA	A0A5W0P2U6_SALER
psiA	A0A5W0S9G9_SALTM
psiA	A0A5W0U8N6_SALTM
psiA	A0A5W2NWD1_SALET
psiA	A0A5W5E284_SALNE
psiA	A0A5W8FQT7_SALON
psiA	A0A5W8MV15_SALET
psiA	A0A5W8TE55_SALET
psiA	A0A5X1G811_SALTM
psiA	A0A5X1VB62_SALMO
psiA	A0A5X2B2X6_SALET
psiA	A0A5X5CAX1_SALET
psiA	A0A5X6SGP2_SALVI
psiA	A0A5X8ATX5_SALET
psiA	A0A5X9VNY7_SALET
psiA	A0A5Y0T8X3_SALBL
psiA	A0A5Y3W7T4_SALDZ
psiA	A0A5Z3B2P0_SALER
psiA	A0A5Z6G6W9_SALET
psiA	A0A5Z6V2M6_SALET
psiA	A0A5Z7PWD1_SALET
psiA	A0A5Z8ZCD5_SALDE
psiA	A0A601FVL2_SALET
psiA	A0A601NMX0_SALAN
psiA	A0A602TPK1_SALET
psiA	A0A603MMG9_SALER
psiA	A0A603VN41_SALMO
psiA	A0A604SMA4_SALIN
psiA	A0A604WEL6_SALEN
psiA	A0A610C122_SALET
psiA	A0A617YGJ6_SALEN
psiA	A0A627FA72_SALER
psiA	A0A629P4Y5_SALIN
psiA	A0A630VZC1_SALET
psiA	A0A632YVI4_SALER
psiA	A0A638GMZ5_SALET
psiA	A0A644RVC5_SALET
psiA	A0A650AAS6_KLEPN
psiA	A0A6C6ZGU9_SALHS
psiA	A0A6C8M1V4_SALET
psiA	A0A6D1Q988_SALET
psiA	A0A6D1SMT1_SALET
psiA	A0A6M4NQ54_KLEPN
psiA	A0A6N3R685_SHIFL
psiA	A0A6X8N1V7_SALET
psiA	A0A6Y0Z357_SALET
psiA	A0A6Y1VJM3_SALET
psiA	A0A6Y1YYZ5_SALIN
psiA	A0A6Y1Z4T7_SALIN
psiA	A0A6Y5CJ74_SALDE
psiA	A0A702E049_SALER
psiA	A0A702W5S9_SALIN
psiA	A0A708JU26_SALTM
psiA	A0A708R4K7_SALTM
psiA	A0A708TV68_SALTM
psiA	A0A709HX23_SALTM
psiA	A0A718R5X9_SALTS
psiA	A0A719E6U8_SALTS
psiA	A0A719LQP3_SALTS
psiA	A0A722HSX0_SALER
psiA	A0A722L9P0_SALER
psiA	A0A723QBV3_SALER
psiA	A0A724BG14_SALER
psiA	A0A725H9P4_SALMO
psiA	A0A728IWC2_SALMU
psiA	A0A728L0N0_SALET
psiA	A0A730IXX7_SALET
psiA	A0A730XTH0_SALMU
psiA	A0A731VPD7_SALTM
psiA	A0A732EZA7_SALET
psiA	A0A733EK73_SALET
psiA	A0A735LM07_SALET
psiA	A0A736KBD5_SALTH
psiA	A0A736NWC5_SALET
psiA	A0A737IAM3_SALET
psiA	A0A737SDI6_SALET
psiA	A0A737VQP3_SALET
psiA	A0A739MB70_SALDE
psiA	A0A741RU57_SALET
psiA	A0A742HQ69_SALET
psiA	A0A750QPN4_SALER
psiA	A0A752JZ15_SALMU
psiA	A0A753CD80_SALIN
psiA	A0A754VGZ9_SALER
psiA	A0A759XQW4_SALER
psiA	A0A7B5PCP2_ECOLX
psiA	A0A7B5PE48_ECOLX
psiA	A0A7B5TE10_ECOLX
psiA	A0A7B6F242_ECOLX
psiA	A0A7B6F2D5_ECOLX
psiA	A0A7D6F159_ECOLX
psiA	A0A7D6J4E3_ESCFE
psiA	A0A7G1GDJ4_SALET
psiA	A0A7I0L1Z7_ECOLX
psiA	A0A7I9AZ17_ECOLX
psiA	A0A7L9V0G3_SALET
psiA	A0A7L9V197_SALET
psiA	A0A7M3PPU7_ECOLX
psiA	A0A7R6U9L4_ECOLX
psiA	A0A7U9AQX5_ECOLX
psiA	A0A7U9BT07_ECOLX
psiA	A0A7U9QBL3_ECOLX
psiA	A0A7Z1I8C4_SHISO
psiA	A0A826L996_ECOLX
psiA	A0A826M7U5_ECOLX
psiA	A0A826MBX1_ECOLX
psiA	A0A826NGP5_ECOLX
psiA	A0A827BHM7_ECOLX
psiA	A0A827QWL7_ECOLX
psiA	A0A828ABL3_ECOLX
psiA	A0A828ACH0_ECOLX
psiA	A0A828BEL3_ECOLX
psiA	A0A829IUB1_ECOLX
psiA	A0A829L426_ECOLX
psiA	A0A858XW56_SALET
psiA	A0A862ZC04_ECOLX
psiA	A0A895NYA0_ECOLX
psiA	A0A896ZF32_SHISO
psiA	A0A8B0SWU8_SALET
psiA	A0A8B4NNE1_ECOLX
psiA	A0A8B5FHB3_ECOLX
psiA	A0A8E0IUL0_ECOLX
psiA	A0A8E2GSN8_ECOLX
psiA	A0A8E2KQ08_ECOLX
psiA	A0A8E5UBR1_9ENTR
psiA	A0A8E6JJF5_SALTM
psiA	A0A8F9H6J1_ECOLX
psiA	A0A8H0RDP6_ECOLX
psiA	A0A8H0RDT0_ECOLX
psiA	A0A8H0RDX9_ECOLX
psiA	A0A8H1RIW3_ECOLX
psiA	A0A8H9DET5_SHIFL
psiA	A0A8H9EEX2_9ESCH
psiA	A0A8S7K391_ECOLX
psiA	A0A8S7X2R5_ECOLX
psiA	A7ZH15_ECO24
psiA	C1J8H7_ECOLX
psiA	C1J8T1_ECOLX
psiA	C7SA23_ECOLX
psiA	D2WFG2_ECOLX
psiA	D7XH30_ECOLX
psiA	D8AFR2_ECOMS
psiA	E0J3A0_ECOLW
psiA	E0WGX6_ECOLX
psiA	E1JFK0_ECOLX
psiA	E6BSM6_ECOLX
psiA	E7BTF7_ECOLX
psiA	E8XLS1_SALT4
psiA	E9LM67_SALET
psiA	E9TIQ2_ECOLX
psiA	E9XU43_ECOLX
psiA	F5P4P8_SHIFL
psiA	G2HK56_SALTM
psiA	H9TKH8_SALET
psiA	I2UI60_ECOLX
psiA	I6E471_SHIBO
psiA	I7A4W1_ECOLX
psiA	K0GXT3_SALET
psiA	K4KBU9_SALDE
psiA	K4W6E6_ECOLX
psiA	L3Q778_ECOLX
psiA	N0GU44_SHISO
psiA	Q3ZU52_ECOLX
psiA	Q4FIJ7_SALER
psiA	Q5J3W9_SALCH
psiA	Q7B1W4_ECOLX
psiA	Q8L227_SALTM
psiA	Q9Z4D2_SHISO
psiA	S1PVE0_ECOLX
psiA	T1PXA4_SALEN
psiA	U9XRW1_ECOLX
psiA	U9XWU5_ECOLX
psiA	U9Z8B7_ECOLX
psiA	W1EY34_ECOLX
psiB_ECOLX	A0A023UKN0_ECOLX
psiB_ECOLX	A0A061YB40_ECOLX
psiB_ECOLX	A0A064CUV0_CITFR
psiB_ECOLX	A0A075MC72_ECOLX
psiB_ECOLX	A0A075MDW7_ECOLX
psiB_ECOLX	A0A085NWU8_ECOLX
psiB_ECOLX	A0A0A3YP54_9GAMM
psiB_ECOLX	A0A0C5EUA0_ECOLX
psiB_ECOLX	A0A0C5PC69_SHIFL
psiB_ECOLX	A0A0D7LBP5_CITFR
psiB_ECOLX	A0A0D7LGM0_CITFR
psiB_ECOLX	A0A0D8TX72_RAOPL
psiB_ECOLX	A0A0E0SRY1_ECOLX
psiB_ECOLX	A0A0E1CML7_KLEPN
psiB_ECOLX	A0A0E2KWF7_ECOU3
psiB_ECOLX	A0A0E2LB80_ECOU3
psiB_ECOLX	A0A0E3MRN9_KLEPN
psiB_ECOLX	A0A0F6AW79_SALT1
psiB_ECOLX	A0A0F6ZLE4_ECOLX
psiB_ECOLX	A0A0G3B3J0_9ENTR
psiB_ECOLX	A0A0G3VJE8_KLEPN
psiB_ECOLX	A0A0H2XJF5_ECOK1
psiB_ECOLX	A0A0H3ER87_ECO8N
psiB_ECOLX	A0A0H3H5X3_KLEPH
psiB_ECOLX	A0A0H3JD71_ECO57
psiB_ECOLX	A0A0H3P183_SALTS
psiB_ECOLX	A0A0H3PL43_ECO5C
psiB_ECOLX	A0A0J1M4W7_9ENTR
psiB_ECOLX	A0A0J1PQY4_9ENTR
psiB_ECOLX	A0A0J2D4W0_ECOLX
psiB_ECOLX	A0A0J2GJ35_9ENTR
psiB_ECOLX	A0A0J2JXS0_9ENTR
psiB_ECOLX	A0A0J8YCW7_9GAMM
psiB_ECOLX	A0A0K0NQ03_ENTCL
psiB_ECOLX	A0A0K2B7F8_ECOLX
psiB_ECOLX	A0A0K4NDR5_ECOLX
psiB_ECOLX	A0A0K4NT52_ECOLX
psiB_ECOLX	A0A0L1BLH8_ECOLX
psiB_ECOLX	A0A0M4KW30_RAOOR
psiB_ECOLX	A0A0P0G1X1_9BACT
psiB_ECOLX	A0A0P7SU86_ECOLX
psiB_ECOLX	A0A140KU56_SHISO
psiB_ECOLX	A0A140WYL2_ECOLX
psiB_ECOLX	A0A142CMY3_SHIDY
psiB_ECOLX	A0A142EB72_ECOLX
psiB_ECOLX	A0A142I4P1_PLUGE
psiB_ECOLX	A0A168QBB4_CITFR
psiB_ECOLX	A0A168QCR9_KLEPN
psiB_ECOLX	A0A192CME0_ECOLX
psiB_ECOLX	A0A1B0GXJ8_ENTCL
psiB_ECOLX	A0A1B1LQ03_KLEAE
psiB_ECOLX	A0A1D3KMY1_ECOLX
psiB_ECOLX	A0A1D9N9W6_KLEPN
psiB_ECOLX	A0A1E5WRZ9_ECOLX
psiB_ECOLX	A0A1F2LVL3_9ENTR
psiB_ECOLX	A0A1H8XJP3_9ENTR
psiB_ECOLX	A0A1L4J6D9_ECOLX
psiB_ECOLX	A0A1M0NER2_ECOLX
psiB_ECOLX	A0A1M2QQD4_ECOLX
psiB_ECOLX	A0A1P8VT85_KLEPN
psiB_ECOLX	A0A1Q6B304_ECOLX
psiB_ECOLX	A0A1Q8YUH7_9ENTR
psiB_ECOLX	A0A1Q8YV09_9ENTR
psiB_ECOLX	A0A1S0Z9A7_SALET
psiB_ECOLX	A0A1S5SKY4_ECOLX
psiB_ECOLX	A0A1S6L5B8_SALTM
psiB_ECOLX	A0A1S6XXZ6_ENTCL
psiB_ECOLX	A0A1S7H7P0_SALTM
psiB_ECOLX	A0A1U9Y6A2_KLEVA
psiB_ECOLX	A0A1W6QXY9_KLEPN
psiB_ECOLX	A0A1X3I3G9_ECOLX
psiB_ECOLX	A0A1X3IT17_ECOLX
psiB_ECOLX	A0A1X3J869_ECOLX
psiB_ECOLX	A0A1X3JN79_ECOLX
psiB_ECOLX	A0A1X3KUP5_ECOLX
psiB_ECOLX	A0A1Z1N1E5_KLEAE
psiB_ECOLX	A0A1Z3MM18_KLEOX
psiB_ECOLX	A0A1Z3N3G4_9ENTR
psiB_ECOLX	A0A220SXF2_ECOLX
psiB_ECOLX	A0A223LMT5_KLEPN
psiB_ECOLX	A0A228ZBS9_ECOLX
psiB_ECOLX	A0A234XMQ5_ECOLX
psiB_ECOLX	A0A241PY15_SALET
psiB_ECOLX	A0A251ZCW2_PLUGE
psiB_ECOLX	A0A256DV86_CITFR
psiB_ECOLX	A0A256DZQ2_CITFR
psiB_ECOLX	A0A263VLW2_ENTAS
psiB_ECOLX	A0A285B881_9ENTR
psiB_ECOLX	A0A286NCJ0_ENTCL
psiB_ECOLX	A0A291E384_9ENTR
psiB_ECOLX	A0A2A2C9W1_ECOLX
psiB_ECOLX	A0A2A3V1K1_ECOLX
psiB_ECOLX	A0A2A5MBQ5_9ENTR
psiB_ECOLX	A0A2A7U841_EDWTA
psiB_ECOLX	A0A2C5SUA3_MORMO
psiB_ECOLX	A0A2F0P9L4_SERMA
psiB_ECOLX	A0A2F0PB63_SERMA
psiB_ECOLX	A0A2G8CYX4_9GAMM
psiB_ECOLX	A0A2G8ED57_9GAMM
psiB_ECOLX	A0A2H4TK40_ECOLX
psiB_ECOLX	A0A2H4TLF1_ECOLX
psiB_ECOLX	A0A2I6FMV3_ECOLX
psiB_ECOLX	A0A2I7ZHM7_KLEPN
psiB_ECOLX	A0A2J0PZA9_9ENTR
psiB_ECOLX	A0A2J3DEL3_9ENTR
psiB_ECOLX	A0A2J4ZI79_9ENTR
psiB_ECOLX	A0A2J4ZK56_9ENTR
psiB_ECOLX	A0A2J4ZT57_9ENTR
psiB_ECOLX	A0A2J4ZVT0_9ENTR
psiB_ECOLX	A0A2K9V2B1_ECOLX
psiB_ECOLX	A0A2L1KT64_KLEPN
psiB_ECOLX	A0A2N4Z3J3_KLEVA
psiB_ECOLX	A0A2N4Z523_KLEVA
psiB_ECOLX	A0A2N5ABD9_KLEVA
psiB_ECOLX	A0A2N5AJI9_KLEVA
psiB_ECOLX	A0A2P9EA97_ECOLX
psiB_ECOLX	A0A2R4NG31_KLEAE
psiB_ECOLX	A0A2R4NHB2_KLEAE
psiB_ECOLX	A0A2R4PEM4_ECOLX
psiB_ECOLX	A0A2S1FVE3_9BACT
psiB_ECOLX	A0A2S1J6J8_ECOLX
psiB_ECOLX	A0A2S1J9C2_ECOLX
psiB_ECOLX	A0A2S1PMQ9_EDWTA
psiB_ECOLX	A0A2S1PR39_9ENTR
psiB_ECOLX	A0A2S4Q776_CITFR
psiB_ECOLX	A0A2S4RR71_CITAM
psiB_ECOLX	A0A2S4SJL0_9ENTR
psiB_ECOLX	A0A2S8JJU5_ECOLX
psiB_ECOLX	A0A2T2XX46_9ENTR
psiB_ECOLX	A0A2T8T151_SALER
psiB_ECOLX	A0A2T8WV21_SALET
psiB_ECOLX	A0A2T8X2B2_SALET
psiB_ECOLX	A0A2U8T036_PSEAI
psiB_ECOLX	A0A2W0FU69_9ENTR
psiB_ECOLX	A0A2X1N5G7_ECOLX
psiB_ECOLX	A0A2X3I1E5_KLEPN
psiB_ECOLX	A0A2X3KJJ4_KLEPN
psiB_ECOLX	A0A2X3MHN8_CITFR
psiB_ECOLX	A0A2X5UX97_ECOLX
psiB_ECOLX	A0A2X7G9F0_ECOLX
psiB_ECOLX	A0A2Y0FWJ2_ECOLX
psiB_ECOLX	A0A2Z0N063_KLEPN
psiB_ECOLX	A0A2Z3XFH2_9ENTR
psiB_ECOLX	A0A2Z3XFU8_9ENTR
psiB_ECOLX	A0A2Z3XGV4_9ENTR
psiB_ECOLX	A0A2Z5DZ81_KLEPN
psiB_ECOLX	A0A2Z5WRL2_ECOLX
psiB_ECOLX	A0A2Z6FAX4_ECO57
psiB_ECOLX	A0A315FW27_SALET
psiB_ECOLX	A0A328TU59_9GAMM
psiB_ECOLX	A0A330E0F0_9ENTR
psiB_ECOLX	A0A332KHP6_KLEPN
psiB_ECOLX	A0A345DKZ8_ECOLX
psiB_ECOLX	A0A346GSQ3_ECOLX
psiB_ECOLX	A0A370V515_9ESCH
psiB_ECOLX	A0A376J498_9GAMM
psiB_ECOLX	A0A376LRS3_ECOLX
psiB_ECOLX	A0A376UX35_ECOLX
psiB_ECOLX	A0A376YNZ1_ECOLX
psiB_ECOLX	A0A376ZNU7_ECOLX
psiB_ECOLX	A0A377YTX2_KLEPN
psiB_ECOLX	A0A377YWB9_KLEPO
psiB_ECOLX	A0A378BVW4_KLEPR
psiB_ECOLX	A0A378UEV7_KLEPO
psiB_ECOLX	A0A379CSL4_PLUGE
psiB_ECOLX	A0A379SEM4_SALER
psiB_ECOLX	A0A379SMB0_SALER
psiB_ECOLX	A0A381KTL7_CITFR
psiB_ECOLX	A0A384HHP8_9ENTR
psiB_ECOLX	A0A385JKU5_SALTM
psiB_ECOLX	A0A387K1L4_9ENTR
psiB_ECOLX	A0A387K255_9ENTR
psiB_ECOLX	A0A3G2CE38_SERMA
psiB_ECOLX	A0A3G4RVT3_ECOLX
psiB_ECOLX	A0A3H5UC94_SALER
psiB_ECOLX	A0A3J2NHE4_SALER
psiB_ECOLX	A0A3J5QWP9_SALER
psiB_ECOLX	A0A3K5NK77_SALER
psiB_ECOLX	A0A3K5RGE0_SALER
psiB_ECOLX	A0A3K9AEZ7_SALER
psiB_ECOLX	A0A3L5EEY9_ECOLX
psiB_ECOLX	A0A3N2RNT0_9ENTR
psiB_ECOLX	A0A3N2RSV3_9ENTR
psiB_ECOLX	A0A3P2ILW4_KLEPN
psiB_ECOLX	A0A3Q0N5T9_ECOLX
psiB_ECOLX	A0A3Q8D3Z6_9ENTR
psiB_ECOLX	A0A3Q8VL52_SALDE
psiB_ECOLX	A0A3Q9U790_9ENTR
psiB_ECOLX	A0A3R0EI46_SALET
psiB_ECOLX	A0A3R0X7T5_SALON
psiB_ECOLX	A0A3R1AWT7_SALET
psiB_ECOLX	A0A3R9AFN0_ENTCL
psiB_ECOLX	A0A3S5I3P3_9ENTR
psiB_ECOLX	A0A3T0ZC22_9ENTR
psiB_ECOLX	A0A3U4H4T6_SALET
psiB_ECOLX	A0A3V3GXF1_SALMU
psiB_ECOLX	A0A3V7Z124_SALER
psiB_ECOLX	A0A3X0HDS6_SALER
psiB_ECOLX	A0A3Y2G321_ECOLX
psiB_ECOLX	A0A3Y4YM01_SALET
psiB_ECOLX	A0A3Y6YGH6_SALET
psiB_ECOLX	A0A3Z1V875_SALTM
psiB_ECOLX	A0A3Z1VB08_SALTM
psiB_ECOLX	A0A3Z2P2S9_SALEN
psiB_ECOLX	A0A3Z3MKI8_SALET
psiB_ECOLX	A0A3Z6QNU3_SALET
psiB_ECOLX	A0A3Z6QQW9_SALET
psiB_ECOLX	A0A402PX16_SALER
psiB_ECOLX	A0A402TRU1_SALER
psiB_ECOLX	A0A403A5N8_SHIDY
psiB_ECOLX	A0A422WQR1_KLEPN
psiB_ECOLX	A0A428LGG7_9ENTR
psiB_ECOLX	A0A443UFR3_ENTCL
psiB_ECOLX	A0A443UWV8_9ENTR
psiB_ECOLX	A0A443VHI9_RAOPL
psiB_ECOLX	A0A443XDF3_ENTCL
psiB_ECOLX	A0A443XEL5_ENTCL
psiB_ECOLX	A0A483K7G2_9ENTR
psiB_ECOLX	A0A483ZE33_KLEPN
psiB_ECOLX	A0A485D554_RAOPL
psiB_ECOLX	A0A485E494_ECOLX
psiB_ECOLX	A0A486DNC1_KLEPN
psiB_ECOLX	A0A486QQ54_KLEPN
psiB_ECOLX	A0A486TFX7_KLEPN
psiB_ECOLX	A0A4C9C038_ECOLX
psiB_ECOLX	A0A4D0QST6_ECOLX
psiB_ECOLX	A0A4D6FVV1_RAOOR
psiB_ECOLX	A0A4D6P4N9_SALET
psiB_ECOLX	A0A4D9YEU1_ECOLX
psiB_ECOLX	A0A4P3K863_SALNE
psiB_ECOLX	A0A4P7Y0J3_SALET
psiB_ECOLX	A0A4P8WAU0_KLEPN
psiB_ECOLX	A0A4Q0WQ43_ECOLX
psiB_ECOLX	A0A4U9DD66_RAOTE
psiB_ECOLX	A0A4V6GGE5_SALET
psiB_ECOLX	A0A4Y1N8M4_SALET
psiB_ECOLX	A0A4Y1YPM5_ECOLX
psiB_ECOLX	A0A4Y9WPS0_ECOLX
psiB_ECOLX	A0A4Y9WSG4_ECOLX
psiB_ECOLX	A0A514EZP2_9ENTR
psiB_ECOLX	A0A514F086_9ENTR
psiB_ECOLX	A0A516IIS6_SALET
psiB_ECOLX	A0A5C5HAU7_SALET
psiB_ECOLX	A0A5D1Z809_SALEN
psiB_ECOLX	A0A5D3J6U5_KLEPN
psiB_ECOLX	A0A5E9ST25_ECOLX
psiB_ECOLX	A0A5F1EFJ9_9ESCH
psiB_ECOLX	A0A5F1PKF4_ECOLX
psiB_ECOLX	A0A5H3HGY3_SALMO
psiB_ECOLX	A0A5H6TKD7_SALAB
psiB_ECOLX	A0A5H7NUZ8_SALET
psiB_ECOLX	A0A5H8RZV7_SALET
psiB_ECOLX	A0A5I1ES48_SALET
psiB_ECOLX	A0A5I1M6U2_SALVI
psiB_ECOLX	A0A5I1PWQ2_SALON
psiB_ECOLX	A0A5I2MB81_SALET
psiB_ECOLX	A0A5I4QKD5_SALON
psiB_ECOLX	A0A5I4TFG1_SALET
psiB_ECOLX	A0A5I6PXW4_SALET
psiB_ECOLX	A0A5J0F148_SALET
psiB_ECOLX	A0A5J6W8S4_9ENTR
psiB_ECOLX	A0A5P2M696_9ENTR
psiB_ECOLX	A0A5P6KHK2_9ENTR
psiB_ECOLX	A0A5S9LY95_9ENTR
psiB_ECOLX	A0A5S9M0G9_9ENTR
psiB_ECOLX	A0A5T4MUS5_SALER
psiB_ECOLX	A0A5T8YBA8_SALER
psiB_ECOLX	A0A5U0P2L2_SALER
psiB_ECOLX	A0A5U2EDK7_SALER
psiB_ECOLX	A0A5U3C2N2_SALER
psiB_ECOLX	A0A5U3F0Y9_SALET
psiB_ECOLX	A0A5U3IQY8_SALER
psiB_ECOLX	A0A5U3R844_SALER
psiB_ECOLX	A0A5U3TSU3_SALER
psiB_ECOLX	A0A5U3TZ43_SALER
psiB_ECOLX	A0A5U3VJ59_SALER
psiB_ECOLX	A0A5U7LY96_SALER
psiB_ECOLX	A0A5U7RUL7_SALER
psiB_ECOLX	A0A5U9BPC7_SALET
psiB_ECOLX	A0A5V1PN00_SALER
psiB_ECOLX	A0A5V3AUS8_SALER
psiB_ECOLX	A0A5V6DN93_SALET
psiB_ECOLX	A0A5V6NGA2_SALET
psiB_ECOLX	A0A5V7V4U9_SALHA
psiB_ECOLX	A0A5W1Z5M6_SALNE
psiB_ECOLX	A0A5W2M109_SALET
psiB_ECOLX	A0A5W5JTE7_SALET
psiB_ECOLX	A0A5W6KQJ0_SALTM
psiB_ECOLX	A0A5W8A3X9_SALET
psiB_ECOLX	A0A5W8G3W7_SALON
psiB_ECOLX	A0A5X3P7V7_SALET
psiB_ECOLX	A0A5X4PKN6_SALET
psiB_ECOLX	A0A5X5PSY5_SALET
psiB_ECOLX	A0A5X7K565_SALET
psiB_ECOLX	A0A5X8YZ62_SALET
psiB_ECOLX	A0A5X9FF68_SALET
psiB_ECOLX	A0A5X9FN17_SALET
psiB_ECOLX	A0A5Y0RWH7_SALNE
psiB_ECOLX	A0A5Y1SS92_SALER
psiB_ECOLX	A0A5Y1WM02_SALER
psiB_ECOLX	A0A5Y1YHI1_SALDZ
psiB_ECOLX	A0A5Y2EGA7_SALET
psiB_ECOLX	A0A5Y2FL47_SALNE
psiB_ECOLX	A0A5Y2LY01_SALER
psiB_ECOLX	A0A5Y2N2J2_SALHA
psiB_ECOLX	A0A5Y3N215_SALER
psiB_ECOLX	A0A5Y3Q5E6_SALER
psiB_ECOLX	A0A5Y3V2D5_SALER
psiB_ECOLX	A0A5Y3V4F8_SALER
psiB_ECOLX	A0A5Y4Z0D1_SALER
psiB_ECOLX	A0A5Y9YE16_SALER
psiB_ECOLX	A0A5Z1TTA7_SALET
psiB_ECOLX	A0A5Z3BE63_SALER
psiB_ECOLX	A0A5Z5VI44_SALET
psiB_ECOLX	A0A5Z7MZS3_SALET
psiB_ECOLX	A0A5Z8LN30_SALER
psiB_ECOLX	A0A602MRA6_SALET
psiB_ECOLX	A0A602Z5P7_SALET
psiB_ECOLX	A0A603BHH8_SALER
psiB_ECOLX	A0A603BKH2_SALER
psiB_ECOLX	A0A603JEP9_SALTM
psiB_ECOLX	A0A603QCG1_SALTM
psiB_ECOLX	A0A607KEP0_SALET
psiB_ECOLX	A0A609J0P0_SALTM
psiB_ECOLX	A0A609NU38_SALET
psiB_ECOLX	A0A612C703_SALMO
psiB_ECOLX	A0A612GN09_SALET
psiB_ECOLX	A0A614N2L0_SALET
psiB_ECOLX	A0A618FHU0_SALMU
psiB_ECOLX	A0A619I2S0_SALER
psiB_ECOLX	A0A621UZJ3_SALER
psiB_ECOLX	A0A623PKD6_SALER
psiB_ECOLX	A0A624GNV5_SALER
psiB_ECOLX	A0A625ARY5_SALMU
psiB_ECOLX	A0A625TZ64_SALNE
psiB_ECOLX	A0A625VTU4_SALTM
psiB_ECOLX	A0A627B7N6_SALER
psiB_ECOLX	A0A627YVV1_SALER
psiB_ECOLX	A0A628KE34_SALEN
psiB_ECOLX	A0A628V6W9_SALER
psiB_ECOLX	A0A629HFH1_SALSE
psiB_ECOLX	A0A629TX27_SALNE
psiB_ECOLX	A0A633B0L6_SALER
psiB_ECOLX	A0A633C707_SALER
psiB_ECOLX	A0A633LE39_SALER
psiB_ECOLX	A0A633RDL6_SALER
psiB_ECOLX	A0A636IKG5_SALNE
psiB_ECOLX	A0A639WJQ8_SALER
psiB_ECOLX	A0A639ZCF4_SALER
psiB_ECOLX	A0A647APZ5_SALTM
psiB_ECOLX	A0A658NN89_9ENTR
psiB_ECOLX	A0A659H0A7_ECOLX
psiB_ECOLX	A0A660G310_9ENTR
psiB_ECOLX	A0A660HKN0_ECOLX
psiB_ECOLX	A0A663BEB9_9ENTR
psiB_ECOLX	A0A6B7Q852_9ENTR
psiB_ECOLX	A0A6C0NDW6_9ENTR
psiB_ECOLX	A0A6C7AW34_SALTU
psiB_ECOLX	A0A6C7D5S2_SALER
psiB_ECOLX	A0A6C7I8V5_SALTD
psiB_ECOLX	A0A6C8MCQ0_SALER
psiB_ECOLX	A0A6C8YGQ6_SALER
psiB_ECOLX	A0A6D1E4L6_ECOLX
psiB_ECOLX	A0A6G4KTC4_ECOLX
psiB_ECOLX	A0A6G6AQM8_9ENTR
psiB_ECOLX	A0A6G7ICV3_KLEAE
psiB_ECOLX	A0A6H0A6T6_ECOLX
psiB_ECOLX	A0A6H0A7G5_KLEPN
psiB_ECOLX	A0A6H2GSG3_9ESCH
psiB_ECOLX	A0A6I4YLE7_SERMA
psiB_ECOLX	A0A6L5EFV0_9ENTR
psiB_ECOLX	A0A6L6IKP9_9ESCH
psiB_ECOLX	A0A6L6SBC5_ECOLX
psiB_ECOLX	A0A6L6YC74_9ENTR
psiB_ECOLX	A0A6L6YDF8_9ENTR
psiB_ECOLX	A0A6L7EKW5_9ENTR
psiB_ECOLX	A0A6L7FFE6_ECOLX
psiB_ECOLX	A0A6M4NRF1_9ENTR
psiB_ECOLX	A0A6M4NRR5_9ENTR
psiB_ECOLX	A0A6M8UHG0_9GAMM
psiB_ECOLX	A0A6N7KLF6_ECOLX
psiB_ECOLX	A0A6S5GPT0_ECOLX
psiB_ECOLX	A0A6W0HB16_SALET
psiB_ECOLX	A0A6W0P0A9_SALRU
psiB_ECOLX	A0A6X7KK60_SALET
psiB_ECOLX	A0A6X8DUS0_SALET
psiB_ECOLX	A0A6Y2A631_SALTM
psiB_ECOLX	A0A6Y2ZWE8_SALVI
psiB_ECOLX	A0A6Y3H483_SALDU
psiB_ECOLX	A0A6Y4VKQ6_SALET
psiB_ECOLX	A0A706JLU1_SALTM
psiB_ECOLX	A0A707WTU0_SALTM
psiB_ECOLX	A0A708NLF7_SALTM
psiB_ECOLX	A0A709ASA1_SALTM
psiB_ECOLX	A0A718Y4C7_SALTS
psiB_ECOLX	A0A718Y5U5_SALTS
psiB_ECOLX	A0A723YZ03_SALER
psiB_ECOLX	A0A724CAM1_SALER
psiB_ECOLX	A0A724I937_SALEP
psiB_ECOLX	A0A729G5G5_SALHO
psiB_ECOLX	A0A729JUV6_SALER
psiB_ECOLX	A0A730HTB8_SALON
psiB_ECOLX	A0A730K2J8_SALHO
psiB_ECOLX	A0A731V014_SALET
psiB_ECOLX	A0A734GQ79_SALTM
psiB_ECOLX	A0A734HR18_SALER
psiB_ECOLX	A0A734MP97_SALER
psiB_ECOLX	A0A735MYC9_SALET
psiB_ECOLX	A0A736I1A9_SALHO
psiB_ECOLX	A0A737IDV4_SALHO
psiB_ECOLX	A0A737NUU9_SALHO
psiB_ECOLX	A0A737RHI1_SALET
psiB_ECOLX	A0A738E827_SALAE
psiB_ECOLX	A0A741RUI0_SALET
psiB_ECOLX	A0A741TK72_SALMO
psiB_ECOLX	A0A742DK55_SALMU
psiB_ECOLX	A0A742UFT6_SALER
psiB_ECOLX	A0A742ZPR0_SALER
psiB_ECOLX	A0A743FZT0_SALER
psiB_ECOLX	A0A743T4A5_SALER
psiB_ECOLX	A0A743ZVX8_SALER
psiB_ECOLX	A0A744Q980_SALER
psiB_ECOLX	A0A747TTH7_SALER
psiB_ECOLX	A0A749BZK9_SALER
psiB_ECOLX	A0A750HZ46_SALER
psiB_ECOLX	A0A750MRX0_SALER
psiB_ECOLX	A0A752UK26_SALTM
psiB_ECOLX	A0A753B5L2_SALHO
psiB_ECOLX	A0A753CNG1_SALET
psiB_ECOLX	A0A753JP25_SALER
psiB_ECOLX	A0A754B331_SALER
psiB_ECOLX	A0A756I8H9_SALER
psiB_ECOLX	A0A757RXL1_SALER
psiB_ECOLX	A0A759QPN4_SALER
psiB_ECOLX	A0A759RXS2_SALER
psiB_ECOLX	A0A759T9Y6_SALER
psiB_ECOLX	A0A759WJ17_SALER
psiB_ECOLX	A0A761L0U1_SALER
psiB_ECOLX	A0A763XIA3_SALER
psiB_ECOLX	A0A764FX26_SALER
psiB_ECOLX	A0A765GCU1_SALER
psiB_ECOLX	A0A765NQZ8_SALER
psiB_ECOLX	A0A775YY63_ECOLX
psiB_ECOLX	A0A787HXL7_ECOLX
psiB_ECOLX	A0A7A3BB95_ECOLX
psiB_ECOLX	A0A7B1P692_ECOLX
psiB_ECOLX	A0A7B9YTD5_ECOLX
psiB_ECOLX	A0A7D5FXB5_ENTCL
psiB_ECOLX	A0A7D6JN52_9ENTR
psiB_ECOLX	A0A7D6K5K4_9ENTR
psiB_ECOLX	A0A7D6U7B8_9ENTR
psiB_ECOLX	A0A7D7KHN4_ECOLX
psiB_ECOLX	A0A7G8AEL3_ECOLX
psiB_ECOLX	A0A7G9ABF3_KLEPN
psiB_ECOLX	A0A7H0EUQ2_KLEVA
psiB_ECOLX	A0A7H4N4D9_KLEVA
psiB_ECOLX	A0A7H4YQH4_ECOLX
psiB_ECOLX	A0A7H5A138_9ENTR
psiB_ECOLX	A0A7H9G3T7_CITFR
psiB_ECOLX	A0A7H9GIR5_9ENTR
psiB_ECOLX	A0A7H9K380_ENTCL
psiB_ECOLX	A0A7H9KDY5_9ESCH
psiB_ECOLX	A0A7H9SGX1_ECOLX
psiB_ECOLX	A0A7I0DMY7_KLEPN
psiB_ECOLX	A0A7I0KXB0_ECOLX
psiB_ECOLX	A0A7I0L271_ECOLX
psiB_ECOLX	A0A7I6TD27_9ENTR
psiB_ECOLX	A0A7I6TSV3_9ENTR
psiB_ECOLX	A0A7I6U7V4_9ENTR
psiB_ECOLX	A0A7I6Y030_9ENTR
psiB_ECOLX	A0A7I7AGX8_RAOPL
psiB_ECOLX	A0A7I7AH96_RAOPL
psiB_ECOLX	A0A7I7DRZ2_9ENTR
psiB_ECOLX	A0A7I7E6Y8_9ENTR
psiB_ECOLX	A0A7L6C169_9ENTR
psiB_ECOLX	A0A7L6DZV3_9ENTR
psiB_ECOLX	A0A7L6INB0_9ENTR
psiB_ECOLX	A0A7L6PT44_9ENTR
psiB_ECOLX	A0A7L6UN83_9ENTR
psiB_ECOLX	A0A7L7EKG9_ECOLX
psiB_ECOLX	A0A7L8QJD0_9ENTR
psiB_ECOLX	A0A7L9UZL2_SALET
psiB_ECOLX	A0A7R7ED24_CITFR
psiB_ECOLX	A0A7S8ZSM7_RAOTE
psiB_ECOLX	A0A7U1E367_ECOLX
psiB_ECOLX	A0A7U5YLL8_SALDZ
psiB_ECOLX	A0A7U8ZGU5_ECOLX
psiB_ECOLX	A0A7U9A0H6_ECOLX
psiB_ECOLX	A0A7U9AQX1_ECOLX
psiB_ECOLX	A0A7U9BD76_ECOLX
psiB_ECOLX	A0A7U9ITK2_ECOLX
psiB_ECOLX	A0A7W2X4Z1_9ENTR
psiB_ECOLX	A0A7W2ZE39_9ENTR
psiB_ECOLX	A0A7W3BAF0_9ENTR
psiB_ECOLX	A0A7W3BUU7_9ENTR
psiB_ECOLX	A0A7W3E3F2_9ENTR
psiB_ECOLX	A0A7W3GC18_9ENTR
psiB_ECOLX	A0A7W3H1Q3_9ENTR
psiB_ECOLX	A0A7W3HGN4_ENTAS
psiB_ECOLX	A0A7X5G4I3_9ENTR
psiB_ECOLX	A0A7Y7BBA9_STRMO
psiB_ECOLX	A0A7Y7EAZ0_STRMO
psiB_ECOLX	A0A7Z8DRC8_SHIFL
psiB_ECOLX	A0A811BT33_KLEPN
psiB_ECOLX	A0A826J725_ECOLX
psiB_ECOLX	A0A826LCD0_ECOLX
psiB_ECOLX	A0A826QBR8_ECOLX
psiB_ECOLX	A0A826W0B4_ECOLX
psiB_ECOLX	A0A826YWT3_ECOLX
psiB_ECOLX	A0A827G008_ECOLX
psiB_ECOLX	A0A827W1S3_ECOLX
psiB_ECOLX	A0A827WW45_ECOLX
psiB_ECOLX	A0A827Y3K0_ECOLX
psiB_ECOLX	A0A827ZIN2_ECOLX
psiB_ECOLX	A0A828ALP7_ECOLX
psiB_ECOLX	A0A828GUT2_ECOLX
psiB_ECOLX	A0A828PH77_ECOLX
psiB_ECOLX	A0A829CBR0_ECOLX
psiB_ECOLX	A0A829E0K0_ECOLX
psiB_ECOLX	A0A829FZ33_ECOLX
psiB_ECOLX	A0A829IVN7_ECOLX
psiB_ECOLX	A0A829L9G3_ECOLX
psiB_ECOLX	A0A831M7W5_ECOLX
psiB_ECOLX	A0A839BIT3_9ESCH
psiB_ECOLX	A0A839CSM7_9ENTR
psiB_ECOLX	A0A844PZP6_KLEPN
psiB_ECOLX	A0A851GBC1_9ENTR
psiB_ECOLX	A0A853E877_ECOLX
psiB_ECOLX	A0A855F1P4_RAOOR
psiB_ECOLX	A0A859RT52_9ENTR
psiB_ECOLX	A0A859X0R0_9ENTR
psiB_ECOLX	A0A873ALZ0_9ENTR
psiB_ECOLX	A0A891SVB5_ECOLX
psiB_ECOLX	A0A896ZFV2_SHIFL
psiB_ECOLX	A0A8B2S843_9ENTR
psiB_ECOLX	A0A8B2UGM6_9ENTR
psiB_ECOLX	A0A8B3JZB1_9ENTR
psiB_ECOLX	A0A8B4U2K4_9ENTR
psiB_ECOLX	A0A8B4U2Q0_9ENTR
psiB_ECOLX	A0A8B6AEU2_9ENTR
psiB_ECOLX	A0A8D5DZN2_SALET
psiB_ECOLX	A0A8D6N0S9_RAOOR
psiB_ECOLX	A0A8D6N2B9_RAOOR
psiB_ECOLX	A0A8D6N2E9_RAOOR
psiB_ECOLX	A0A8E0FZF5_ECOLX
psiB_ECOLX	A0A8E0KAM6_ECOLX
psiB_ECOLX	A0A8E0MF34_ECOLX
psiB_ECOLX	A0A8E2M2U3_ECOLX
psiB_ECOLX	A0A8E2PQD4_ECOLX
psiB_ECOLX	A0A8E5X7K7_9ENTR
psiB_ECOLX	A0A8E6L3M9_KLEPN
psiB_ECOLX	A0A8E6L640_9ESCH
psiB_ECOLX	A0A8E6XZQ5_SALNE
psiB_ECOLX	A0A8E7KE19_SALET
psiB_ECOLX	A0A8E7S6G2_SALRU
psiB_ECOLX	A0A8E7Y4C7_9ENTR
psiB_ECOLX	A0A8E9YUB8_SALET
psiB_ECOLX	A0A8F0D557_SALDZ
psiB_ECOLX	A0A8F6NU38_SALET
psiB_ECOLX	A0A8F7TWF2_KLEVA
psiB_ECOLX	A0A8F7WUM6_KLEPN
psiB_ECOLX	A0A8F9GLK9_ECOLX
psiB_ECOLX	A0A8F9I8K5_ECOLX
psiB_ECOLX	A0A8F9IPM9_ECOLX
psiB_ECOLX	A0A8F9N805_ECOLX
psiB_ECOLX	A0A8G1ILF4_SALER
psiB_ECOLX	A0A8G2LNT9_ECOLX
psiB_ECOLX	A0A8H0N7A1_ECOLX
psiB_ECOLX	A0A8H0QMV0_ECOLX
psiB_ECOLX	A0A8H1B8U2_ECOLX
psiB_ECOLX	A0A8H1ICH8_ECOLX
psiB_ECOLX	A0A8H1K625_ECOLX
psiB_ECOLX	A0A8H1MSY7_ECOLX
psiB_ECOLX	A0A8H8Z8M9_SHIFL
psiB_ECOLX	A0A8H9AGU5_SHIBO
psiB_ECOLX	A0A8H9QFP3_CITFR
psiB_ECOLX	A0A8H9TXG9_9ENTR
psiB_ECOLX	A0A8S7CV93_ECOLX
psiB_ECOLX	A0A8S7IAX1_ECOLX
psiB_ECOLX	A0A8S7NL41_ECOLX
psiB_ECOLX	A0A8S7RC28_ECOLX
psiB_ECOLX	A0A8S7SZ33_ECOLX
psiB_ECOLX	A0A8S7W5U6_ECOLX
psiB_ECOLX	A0A8S7YEG4_ECOLX
psiB_ECOLX	A0A8T6BCT9_ECOLX
psiB_ECOLX	A0A8T6Q3B9_ECOLX
psiB_ECOLX	A0A8T7R638_KLEPN
psiB_ECOLX	A0A8T7R6C5_KLEPN
psiB_ECOLX	A6TIE2_KLEP7
psiB_ECOLX	A6TIR9_KLEP7
psiB_ECOLX	A7ZGM2_ECO24
psiB_ECOLX	A7ZH33_ECO24
psiB_ECOLX	B1LRN4_ECOSM
psiB_ECOLX	B7LI55_ECO45
psiB_ECOLX	B9K6E3_ECOLX
psiB_ECOLX	C5ZZJ2_ECOLX
psiB_ECOLX	C7S9H6_ECOLX
psiB_ECOLX	C8CGP0_ECOLX
psiB_ECOLX	D2D9G6_KLEPN
psiB_ECOLX	D2U5T0_SHISO
psiB_ECOLX	D4HQI1_KLEPN
psiB_ECOLX	D4HR29_KLEPN
psiB_ECOLX	D5KTP5_KLEPN
psiB_ECOLX	D7GK48_ECOLX
psiB_ECOLX	D7GKH8_ECOLX
psiB_ECOLX	D7XH24_ECOLX
psiB_ECOLX	E0D8F2_SALTM
psiB_ECOLX	E1IYW2_ECOLX
psiB_ECOLX	E1J7P4_ECOLX
psiB_ECOLX	E1QMN9_SALET
psiB_ECOLX	E2GHJ3_ECOLX
psiB_ECOLX	E6BRE0_ECOLX
psiB_ECOLX	E8XLG4_SALT4
psiB_ECOLX	E9XTT4_ECOLX
psiB_ECOLX	F0JY72_ESCFE
psiB_ECOLX	F4SZL4_ECOLX
psiB_ECOLX	F4SZL6_ECOLX
psiB_ECOLX	F4TEB9_ECOLX
psiB_ECOLX	F4V536_ECOLX
psiB_ECOLX	F4V9L7_ECOLX
psiB_ECOLX	G5NMX3_SALET
psiB_ECOLX	G5QKT5_SALRU
psiB_ECOLX	G5S5A1_SALET
psiB_ECOLX	G7QEM9_ECOLX
psiB_ECOLX	G7RV54_KLEPN
psiB_ECOLX	G9CAC1_SALTM
psiB_ECOLX	G9G278_KLEPN
psiB_ECOLX	H1ZXK7_ECOLX
psiB_ECOLX	H3JT73_SALTM
psiB_ECOLX	I2UHU1_ECOLX
psiB_ECOLX	I3VZT4_ECOLX
psiB_ECOLX	I3W393_9ENTR
psiB_ECOLX	I3W4D2_SALER
psiB_ECOLX	K7QUA4_KLEPN
psiB_ECOLX	K7R4C1_KLEPN
psiB_ECOLX	L3PIX0_ECOLX
psiB_ECOLX	L4IZZ0_ECOLX
psiB_ECOLX	M4XZP0_KLEPN
psiB_ECOLX	M4Y2X5_KLEPN
psiB_ECOLX	PSIB2_ECOLX
psiB_ECOLX	Q0E840_ECOLX
psiB_ECOLX	Q1A2J9_ECOLX
psiB_ECOLX	Q1R1U3_ECOUT
psiB_ECOLX	Q2TTX4_ECOLX
psiB_ECOLX	Q6SJ40_ECOLX
psiB_ECOLX	Q7AK79_SHIFL
psiB_ECOLX	Q93GP4_SALTY
psiB_ECOLX	Q9ZGR7_ECO57
psiB_ECOLX	R4WBK9_KLEPN
psiB_ECOLX	R4WBR3_KLEPN
psiB_ECOLX	R4Y3K3_KLEPR
psiB_ECOLX	R9S702_KLEPN
psiB_ECOLX	S1ELA2_ECOLX
psiB_ECOLX	S1PB37_ECOLX
psiB_ECOLX	S1Q9C0_ECOLX
psiB_ECOLX	S4VGR6_9BACT
psiB_ECOLX	S5N499_SALBN
psiB_ECOLX	T2HU88_ECOLX
psiB_ECOLX	V0AEZ6_ECOLX
psiB_ECOLX	V0VIU1_ECOLX
psiB_ECOLX	V0YGI2_ECOLX
psiB_ECOLX	V0YIH4_ECOLX
psiB_ECOLX	W1DIU8_KLEPN
psiB_ECOLX	W1F8J2_ECOLX
psiB_ECOLX	W1X2B2_ECOLX
psiB_ECOLX	W1X7J9_ECOLX
psiB_ECOLX	W7NC73_9ENTR
psiB_ECOLX	W8QSY9_KLEPN
psiB_ECOLX	W8RAT7_KLEPN
psiB_ECOLX	W8UT92_KLEPN
psiB_ECOLX	W9BMJ9_KLEPN
psiB_ECOLX	X2JDL5_ECOLX
psiB_ECOLI	A0A075MFN7_ECOLX
psiB_ECOLI	A0A078LMK1_CITKO
psiB_ECOLI	A0A080HQ70_ECOLX
psiB_ECOLI	A0A0A7Y935_ECOLX
psiB_ECOLI	A0A0J2DVW8_ECOLX
psiB_ECOLI	A0A0S3PN74_ECOLX
psiB_ECOLI	A0A140JYD4_ECOLX
psiB_ECOLI	A0A145YX00_ECOLX
psiB_ECOLI	A0A163IHK7_ECOLX
psiB_ECOLI	A0A173GM87_ECOLX
psiB_ECOLI	A0A1C7CCL6_ECOLX
psiB_ECOLI	A0A1M1H6U4_ECOLX
psiB_ECOLI	A0A1X0Y5T4_ECOLX
psiB_ECOLI	A0A1X3M0X2_ECOLX
psiB_ECOLI	A0A2A3WKA3_ECOLX
psiB_ECOLI	A0A2H4ZFM7_9BACT
psiB_ECOLI	A0A2K0P3B6_ECOLX
psiB_ECOLI	A0A2R4NHL2_ECOLX
psiB_ECOLI	A0A2W8GMP9_ECOLX
psiB_ECOLI	A0A376JYW4_ECOLX
psiB_ECOLI	A0A377A252_ECOLX
psiB_ECOLI	A0A383H056_ECOLX
psiB_ECOLI	A0A3A6RJV9_ECOLX
psiB_ECOLI	A0A3A6RYG0_ECOLX
psiB_ECOLI	A0A3G4RTU5_ECOLX
psiB_ECOLI	A0A3R1ADH6_ECOLX
psiB_ECOLI	A0A3V2P0Y3_SALNE
psiB_ECOLI	A0A4D9FGG6_ECOLX
psiB_ECOLI	A0A4Y9WQH8_ECOLX
psiB_ECOLI	A0A5B9AI61_ECOLX
psiB_ECOLI	A0A5B9AVP9_ECOLX
psiB_ECOLI	A0A5F1SXB4_ECOLX
psiB_ECOLI	A0A5I3ET93_SALET
psiB_ECOLI	A0A5U9SZ02_SALET
psiB_ECOLI	A0A5W3ACB9_SALHA
psiB_ECOLI	A0A5X0W8Y0_SALIN
psiB_ECOLI	A0A5X2B3P5_SALET
psiB_ECOLI	A0A5Y4VHY0_SALTM
psiB_ECOLI	A0A618H7L2_SALER
psiB_ECOLI	A0A625XTJ3_SALER
psiB_ECOLI	A0A629HFH8_SALSE
psiB_ECOLI	A0A629S1I9_SALMO
psiB_ECOLI	A0A650AA29_KLEPN
psiB_ECOLI	A0A6C8S271_ECOLX
psiB_ECOLI	A0A6G4KSL6_ECOLX
psiB_ECOLI	A0A6M1DKT6_ECOLX
psiB_ECOLI	A0A6M9X6B0_ECOLX
psiB_ECOLI	A0A6Y0EDC8_SALEN
psiB_ECOLI	A0A730USS4_SALET
psiB_ECOLI	A0A731Y8F7_SALTM
psiB_ECOLI	A0A739YAT7_SALET
psiB_ECOLI	A0A744U5Y1_SALER
psiB_ECOLI	A0A748N2H7_SALTI
psiB_ECOLI	A0A751BAM4_SALER
psiB_ECOLI	A0A788Y8V9_ECOLX
psiB_ECOLI	A0A789RJK8_ECOLX
psiB_ECOLI	A0A7A5Y8I0_ECOLX
psiB_ECOLI	A0A7D6JNJ5_ECOLX
psiB_ECOLI	A0A7H9M0I4_ECOLX
psiB_ECOLI	A0A7I9AWD4_ECOLX
psiB_ECOLI	A0A7L5VSI0_ECOLX
psiB_ECOLI	A0A7U9BJS9_ECOLX
psiB_ECOLI	A0A7W3ANI8_9ESCH
psiB_ECOLI	A0A7W4KPG8_9ESCH
psiB_ECOLI	A0A7Z1J0M2_SHIFL
psiB_ECOLI	A0A7Z8DWJ6_9ESCH
psiB_ECOLI	A0A826SI64_ECOLX
psiB_ECOLI	A0A826TWU9_ECOLX
psiB_ECOLI	A0A826Y6A7_ECOLX
psiB_ECOLI	A0A827QUE4_ECOLX
psiB_ECOLI	A0A829CI78_ECOLX
psiB_ECOLI	A0A8D4ZEA8_SALET
psiB_ECOLI	A0A8D9UMX2_9ESCH
psiB_ECOLI	A0A8E0FSI9_ECOLX
psiB_ECOLI	A0A8H0NUC2_ECOLX
psiB_ECOLI	A0A8H1I4X6_ECOLX
psiB_ECOLI	A0A8H1MG83_ECOLX
psiB_ECOLI	A0A8H1RJL6_ECOLX
psiB_ECOLI	A0A8H1RP39_ECOLX
psiB_ECOLI	A0A8H9BDZ6_9ESCH
psiB_ECOLI	A0A8H9EYJ0_9ESCH
psiB_ECOLI	A0A8H9JLS1_ECOLX
psiB_ECOLI	A0A8H9KAW4_9ESCH
psiB_ECOLI	A0A8H9SX98_ECOLX
psiB_ECOLI	A0A8S7C2V4_ECOLX
psiB_ECOLI	A0A8S7E7V3_ECOLX
psiB_ECOLI	A0A8S7JVQ2_ECOLX
psiB_ECOLI	A0A8S7SRP7_ECOLX
psiB_ECOLI	A0A8T6QIA3_ECOLX
psiB_ECOLI	D0Z6Q5_ECOH1
psiB_ECOLI	D3H5D7_ECO44
psiB_ECOLI	D8EEF7_ECOLX
psiB_ECOLI	D9Z4X2_ECOLX
psiB_ECOLI	E9T9T2_ECOLX
psiB_ECOLI	H9TJ56_SALET
psiB_ECOLI	PSIB1_ECOLI
psiB_ECOLI	Q08JI5_ECOLX
psiB_ECOLI	Q6XQW8_ECOLX
psiB_ECOLI	T2K1M3_ECOLX
psiB_RHILB	A0A060I7I1_9HYPH
psiB_RHILB	A0A0E0UKS9_SINMB
psiB_RHILB	A0A0N1DJJ1_9HYPH
psiB_RHILB	A0A0T6YHG6_9HYPH
psiB_RHILB	A0A178XIY6_9HYPH
psiB_RHILB	A0A1L3LSQ8_9HYPH
psiB_RHILB	A0A1W6KVS4_9HYPH
psiB_RHILB	A0A1W6PYU4_9HYPH
psiB_RHILB	A0A249Q8P4_RHIFR
psiB_RHILB	A0A2A5KIP0_9HYPH
psiB_RHILB	A0A2L0HB66_RHIFR
psiB_RHILB	A0A2T4ILV3_9HYPH
psiB_RHILB	A0A2U8GGY3_RHIFR
psiB_RHILB	A0A3E1AXZ1_RHILT
psiB_RHILB	A0A439VGR5_9HYPH
psiB_RHILB	A0A440B8W3_9HYPH
psiB_RHILB	A0A508WRT1_9HYPH
psiB_RHILB	A0A526SCA1_9HYPH
psiB_RHILB	A0A528LQS8_9HYPH
psiB_RHILB	A0A6A7ZX04_RHIML
psiB_RHILB	A0A6L3YZ96_BRUAN
psiB_RHILB	A0A7X1M6U3_9HYPH
psiB_RHILB	A0A7X2CP46_RHIML
psiB_RHILB	A0A843ZZU4_RHIML
psiB_RHILB	A0A8B3MB83_RHIML
psiB_RHILB	A0A8E2BXC8_RHIML
psiB_RHILB	F7XEU1_SINMM
psiB_RHILB	PSIB_RHILP
psiB_RHILB	S5SDP0_RHIET

## Sheet: MPS
Mating Pair Stabilization Proteins	Protein ID			Sequences obtained through UniRef50 cluster of each protein in the first column
pilS_TP114	A0A023Q066_SHISO
pilS_TP114	A0A089X5Q6_ECOLX
pilS_TP114	A0A0K9T773_ECOLX
pilS_TP114	A0A1B0Y258_SALER
pilS_TP114	A0A1B1ILN3_9ENTR
pilS_TP114	A0A1B1LNS3_ECOLX
pilS_TP114	A0A1I9ZJ71_CROSK
pilS_TP114	A0A1M0E3B6_ECOLX
pilS_TP114	A0A1P8DN81_SALTM
pilS_TP114	A0A1P8DNF4_SALEN
pilS_TP114	A0A1P8SIG8_SALET
pilS_TP114	A0A1P8SIN9_SALET
pilS_TP114	A0A1P8VP59_ECOLX
pilS_TP114	A0A1U9XGD0_ECOLX
pilS_TP114	A0A1U9Y6Z7_CITBR
pilS_TP114	A0A1X3J5I0_ECOLX
pilS_TP114	A0A1Z1V1B1_ECOLX
pilS_TP114	A0A1Z1VVM1_SHIFL
pilS_TP114	A0A218NEZ3_SHISO
pilS_TP114	A0A220QHT0_ECOLX
pilS_TP114	A0A223DQS7_ECOLI
pilS_TP114	A0A2H4NEW1_KLEAE
pilS_TP114	A0A2I7QFL3_KLEPN
pilS_TP114	A0A3G8EUG0_CITAM
pilS_TP114	A0A3G9GNG6_ECOLX
pilS_TP114	A0A3W5Y804_ECOLX
pilS_TP114	A0A3W8H6Q2_SALER
pilS_TP114	A0A5T3FEY1_SALER
pilS_TP114	A0A5W3RBL1_SALET
pilS_TP114	A0A5W4W2F5_SALET
pilS_TP114	A0A5W9YQ55_SALTM
pilS_TP114	A0A5X2NIJ5_SALET
pilS_TP114	A0A5Y5D5F0_SALER
pilS_TP114	A0A602CMV4_SALNE
pilS_TP114	A0A603M648_SALTM
pilS_TP114	A0A610CDC1_SALET
pilS_TP114	A0A629IIJ4_SALER
pilS_TP114	A0A635MBM7_SALEN
pilS_TP114	A0A6G4MVG6_9ENTR
pilS_TP114	A0A6X6XVH5_SALEN
pilS_TP114	A0A6Y4AZG1_SALDZ
pilS_TP114	A0A6Y4WCA8_SALET
pilS_TP114	A0A740XI12_SALET
pilS_TP114	A0A7G8AI11_ECOLX
pilS_TP114	A0A7L9UZN2_SALET
pilS_TP114	A0A7T8KTG5_ECOLX
pilS_TP114	A0A877HUF2_SALTM
pilS_TP114	A0A8B4CN11_SHISO
pilS_TP114	A0A8F3ENF0_KLEPN
pilS_TP114	A0A8F9C0A7_ECOLX
pilS_TP114	A0A8H8Z4V1_SHIFL
pilS_TP114	H1ZXY3_ECOLX
pilS_TP114	H9TID4_SALET
pilS_TP114	M1EWV2_ECOLX
pilS_TP114	Q9F538_ECOLX
pilS_TP114	U3PI97_KLEPN
pilS_TP114	U9Y693_ECOLX
pilS_TP114	U9YAP4_ECOLX
pilV_KLPN	A0A023PY50_SHISO
pilV_KLPN	A0A0C5B047_ECOLX
pilV_KLPN	A0A0C5B0T8_ECOLX
pilV_KLPN	A0A0D8VVN8_ECOLX
pilV_KLPN	A0A0K9T4D4_ECOLX
pilV_KLPN	A0A0K9T8B1_ECOLX
pilV_KLPN	A0A152IIS4_ECOLX
pilV_KLPN	A0A159X664_ECOLX
pilV_KLPN	A0A160HQC3_ECOLX
pilV_KLPN	A0A168PMK1_ECOLX
pilV_KLPN	A0A1B0Y243_SALER
pilV_KLPN	A0A1B1ILN7_9ENTR
pilV_KLPN	A0A1B1LNJ0_ECOLX
pilV_KLPN	A0A1B1LNS4_ECOLX
pilV_KLPN	A0A1B1LNZ9_ECOLX
pilV_KLPN	A0A1B1LP07_ECOLX
pilV_KLPN	A0A1I9ZJE4_CROSK
pilV_KLPN	A0A1P8DN53_SALTM
pilV_KLPN	A0A1P8DNH7_SALEN
pilV_KLPN	A0A1P8SIH1_SALET
pilV_KLPN	A0A1P8VP56_ECOLX
pilV_KLPN	A0A1S6GK37_ECOLX
pilV_KLPN	A0A1U9XEX6_ECOLX
pilV_KLPN	A0A1U9XFR0_ECOLX
pilV_KLPN	A0A1U9XHQ2_ECOLX
pilV_KLPN	A0A1U9Y6Y9_CITBR
pilV_KLPN	A0A1U9Y6Z3_CITBR
pilV_KLPN	A0A1V0DNJ2_SHISO
pilV_KLPN	A0A1W6F5X7_SHISO
pilV_KLPN	A0A1X9Q9N7_ECOLX
pilV_KLPN	A0A1X9QC24_SHISO
pilV_KLPN	A0A1X9QCA2_SHISO
pilV_KLPN	A0A1X9WIX0_ECOLX
pilV_KLPN	A0A1X9WIX7_ECOLX
pilV_KLPN	A0A1X9WJ95_ECOLX
pilV_KLPN	A0A1X9WJF0_ECOLX
pilV_KLPN	A0A1X9WJF5_ECOLX
pilV_KLPN	A0A1X9WJG2_ECOLX
pilV_KLPN	A0A1X9WJG4_ECOLX
pilV_KLPN	A0A1X9WJN6_ECOLX
pilV_KLPN	A0A1Z1UZG5_ECOLX
pilV_KLPN	A0A1Z1V1A8_ECOLX
pilV_KLPN	A0A1Z1V2F8_ECOLX
pilV_KLPN	A0A1Z1V2H1_ECOLX
pilV_KLPN	A0A1Z1VVL2_SHIFL
pilV_KLPN	A0A218MB71_ECOLX
pilV_KLPN	A0A220QHR3_ECOLX
pilV_KLPN	A0A223DQV8_ECOLI
pilV_KLPN	A0A271QHW5_ECOLX
pilV_KLPN	A0A290GGU0_ECOLX
pilV_KLPN	A0A291R9L6_ECOLX
pilV_KLPN	A0A2H4NF69_ECOLX
pilV_KLPN	A0A2H5CQN8_ECOLX
pilV_KLPN	A0A2P9EEP4_ECOLX
pilV_KLPN	A0A2R4PGY6_ECOLX
pilV_KLPN	A0A2R4PID7_ECOLX
pilV_KLPN	A0A2S1PHQ6_ECOLX
pilV_KLPN	A0A2S7FTH6_ECOLX
pilV_KLPN	A0A2U8T2U2_ECOLX
pilV_KLPN	A0A377EA66_ECOLX
pilV_KLPN	A0A3E1XBI1_SALEN
pilV_KLPN	A0A3G8EUE5_CITAM
pilV_KLPN	A0A3G9GPW7_ECOLX
pilV_KLPN	A0A3I0S5X3_ECOLX
pilV_KLPN	A0A3I0S839_ECOLX
pilV_KLPN	A0A3I1VH53_SALER
pilV_KLPN	A0A3I3S6F9_SALER
pilV_KLPN	A0A3I3S7Q7_SALER
pilV_KLPN	A0A3J8Y0Y7_ECOLX
pilV_KLPN	A0A3K9KGX4_SALER
pilV_KLPN	A0A3L2NRT0_ECOLX
pilV_KLPN	A0A3T8LRR6_SALET
pilV_KLPN	A0A3U1MGJ1_SALET
pilV_KLPN	A0A3U3USL4_SALET
pilV_KLPN	A0A3U3UUV9_SALET
pilV_KLPN	A0A3W5NXZ4_ECOLX
pilV_KLPN	A0A3Y0PBS2_SALET
pilV_KLPN	A0A3Y1S729_SALET
pilV_KLPN	A0A3Y7ISF0_ECOLX
pilV_KLPN	A0A402UMA0_SALER
pilV_KLPN	A0A4Y5T5T8_ECOLX
pilV_KLPN	A0A510ANC0_KLEPN
pilV_KLPN	A0A5E8N298_ECOLX
pilV_KLPN	A0A5F1Q2R4_ECOLX
pilV_KLPN	A0A5F1Q305_ECOLX
pilV_KLPN	A0A5N8H2I2_ECOLX
pilV_KLPN	A0A5V8WIX5_SALTM
pilV_KLPN	A0A5W1WSX6_SALTM
pilV_KLPN	A0A5W3RCS1_SALET
pilV_KLPN	A0A5W3RFI7_SALET
pilV_KLPN	A0A5W4W298_SALET
pilV_KLPN	A0A5W4W2R1_SALET
pilV_KLPN	A0A5W4Z595_SALTM
pilV_KLPN	A0A5W9YQL4_SALTM
pilV_KLPN	A0A5X0V391_SALNE
pilV_KLPN	A0A5X1H1X4_SALTM
pilV_KLPN	A0A5X1H8C1_SALTM
pilV_KLPN	A0A5X2NIU5_SALET
pilV_KLPN	A0A5X2NL57_SALET
pilV_KLPN	A0A5Y4CY54_SALER
pilV_KLPN	A0A5Y8LCE1_SALER
pilV_KLPN	A0A602CMW6_SALNE
pilV_KLPN	A0A604GAY2_SALET
pilV_KLPN	A0A610BZ78_SALET
pilV_KLPN	A0A610C3L7_SALET
pilV_KLPN	A0A610C479_SALET
pilV_KLPN	A0A610C5J1_SALET
pilV_KLPN	A0A616MSZ4_SALET
pilV_KLPN	A0A616MVU2_SALET
pilV_KLPN	A0A629IQW6_SALER
pilV_KLPN	A0A635M743_SALEN
pilV_KLPN	A0A649USC0_ECOLX
pilV_KLPN	A0A657F314_SALEN
pilV_KLPN	A0A6D0DMD9_ECOLX
pilV_KLPN	A0A6D0DW48_ECOLX
pilV_KLPN	A0A6D1NYY5_ECOLX
pilV_KLPN	A0A6D1P2K6_ECOLX
pilV_KLPN	A0A6G9HQR3_ECOLX
pilV_KLPN	A0A6L6IAS7_ECOLX
pilV_KLPN	A0A6L6IBF0_ECOLX
pilV_KLPN	A0A6X6Y9R2_SALEN
pilV_KLPN	A0A6X8JIU1_SALET
pilV_KLPN	A0A6Y4AZL8_SALDZ
pilV_KLPN	A0A6Y4B4G0_SALDZ
pilV_KLPN	A0A6Y4B5U7_SALDZ
pilV_KLPN	A0A6Y4WEB8_SALET
pilV_KLPN	A0A706QBE6_SALTM
pilV_KLPN	A0A708ALE8_SALTM
pilV_KLPN	A0A708AU11_SALTM
pilV_KLPN	A0A708DE32_SALTM
pilV_KLPN	A0A708DKP9_SALTM
pilV_KLPN	A0A709HJC8_SALTM
pilV_KLPN	A0A709HYZ8_SALTM
pilV_KLPN	A0A721YNV8_SALER
pilV_KLPN	A0A726DMS6_SALDZ
pilV_KLPN	A0A737S530_SALET
pilV_KLPN	A0A737SDN1_SALET
pilV_KLPN	A0A737VNV7_SALET
pilV_KLPN	A0A737VRS5_SALET
pilV_KLPN	A0A740XL08_SALET
pilV_KLPN	A0A740XPU1_SALET
pilV_KLPN	A0A741BP31_SALET
pilV_KLPN	A0A749ATU1_SALER
pilV_KLPN	A0A751Y181_SALET
pilV_KLPN	A0A760RFB1_SALER
pilV_KLPN	A0A797CQQ6_ECOLX
pilV_KLPN	A0A7D7KLQ3_ECOLX
pilV_KLPN	A0A7G8AI08_ECOLX
pilV_KLPN	A0A7G8AJR7_ECOLX
pilV_KLPN	A0A7T8KSV8_ECOLX
pilV_KLPN	A0A7T8R0H6_ECOLX
pilV_KLPN	A0A831MPJ4_ECOLX
pilV_KLPN	A0A877HU98_SALTM
pilV_KLPN	A0A8H9DDD0_SHIFL
pilV_KLPN	A0A8H9VWH7_ECOLX
pilV_KLPN	A0A8S7JYB3_ECOLX
pilV_KLPN	A0A8S7N6S4_ECOLX
pilV_KLPN	A0A8T3LGS8_ECOLX
pilV_KLPN	A0A8T3LHG3_ECOLX
pilV_KLPN	H1ZXY0_ECOLX
pilV_KLPN	H9TID7_SALET
pilV_KLPN	M1EXV3_ECOLX
pilV_KLPN	Q04905_ECOLX
pilV_KLPN	U3PE38_KLEPN
pilV_KLPN	U9Y7C9_ECOLX
pilV_KLPN	U9Y7N9_ECOLX
pilV_KLPN	U9Y9D0_ECOLX
pilY1_PSEAE	PILY1_PSEAW
pilY1_PSEAE	PILY1_PSEAE
pilY1_PSEAE	A0A1C7BN18_PSEAI
pilY1_PSEAE	A0A3M5ETQ8_PSEAI
pilY1_PSEAE	A0A0A8RGW8_PSEAI
pilY1_PSEAE	A0A0C2SA84_STUST
pilY1_PSEAE	A0A0D0KW42_9PSED
pilY1_PSEAE	A0A0D6IKZ5_PSEAI
pilY1_PSEAE	A0A0D9ASV7_STUST
pilY1_PSEAE	A0A0F6RV19_PSEAI
pilY1_PSEAE	A0A165NWF3_STUST
pilY1_PSEAE	A0A1F1FFV8_9PSED
pilY1_PSEAE	A0A1G5W3W2_9PSED
pilY1_PSEAE	A0A1G6RV21_9PSED
pilY1_PSEAE	A0A1H2EAA4_9PSED
pilY1_PSEAE	A0A1I5NA65_9PSED
pilY1_PSEAE	A0A2N8SQW6_STUST
pilY1_PSEAE	A0A2R3IQ67_PSEAI
pilY1_PSEAE	A0A2S7FKP0_PSEOL
pilY1_PSEAE	A0A2U9NDI0_9GAMM
pilY1_PSEAE	A0A2W6Z5V3_9CAUL
pilY1_PSEAE	A0A367LXH0_PSEAI
pilY1_PSEAE	A0A367MEU2_PSEAI
pilY1_PSEAE	A0A3B8U030_PSESP
pilY1_PSEAE	A0A3D1VXR3_PSESP
pilY1_PSEAE	A0A3S4MLR7_PSEFL
pilY1_PSEAE	A0A3S4ZR90_STUST
pilY1_PSEAE	A0A431X187_PSEAI
pilY1_PSEAE	A0A4P0TDZ4_PSEAI
pilY1_PSEAE	A0A509JKZ6_PSEAI
pilY1_PSEAE	A0A550L1Z9_PSEAI
pilY1_PSEAE	A0A5C8YEN7_PSEME
pilY1_PSEAE	A0A5D4WFE0_PSEAI
pilY1_PSEAE	A0A5J6QAI7_9PSED
pilY1_PSEAE	A0A5K1SAA4_PSEAI
pilY1_PSEAE	A0A5P9C555_9PSED
pilY1_PSEAE	A0A5P9JN22_9GAMM
pilY1_PSEAE	A0A643EFQ7_PSEAI
pilY1_PSEAE	A0A653B7H4_PSEOL
pilY1_PSEAE	A0A659BKR6_PSEAI
pilY1_PSEAE	A0A6A9K6N1_PSEAI
pilY1_PSEAE	A0A6A9R3W6_STUST
pilY1_PSEAE	A0A6H3G3Z0_PSEAI
pilY1_PSEAE	A0A6N0KDT3_9PSED
pilY1_PSEAE	A0A7T3AVI2_STUST
pilY1_PSEAE	A0A8D5YCH1_STUST
pilY1_PSEAE	A0A8F9NUJ8_PSEAI
pilY1_PSEAE	A0A8G1NB38_PSEAI
pilY1_PSEAE	A0A8G2KS53_PSEAI
pilY1_PSEAE	A0A8G2RY84_PSEAI
pilY1_PSEAE	A0A8G2U9L7_PSEAI
pilY1_PSEAE	A0A8G2XCW6_PSEAI
pilY1_PSEAE	A0A8G3MJG6_PSEAI
pilY1_PSEAE	A0A8G3R2S5_PSEAI
pilY1_PSEAE	A0A8G3WA58_PSEAI
pilY1_PSEAE	A0A8G3YBR3_PSEAI
pilY1_PSEAE	A0A8G4GAB0_PSEAI
pilY1_PSEAE	A0A8G4HU95_PSEAI
pilY1_PSEAE	A0A8G4K2R1_PSEAI
pilY1_PSEAE	A0A8G4KDL3_PSEAI
pilY1_PSEAE	A0A8G4RGE9_PSEAI
pilY1_PSEAE	A0A8G4WWD9_PSEAI
pilY1_PSEAE	A0A8G4YVE8_PSEAI
pilY1_PSEAE	A0A8G5IRX6_PSEAI
pilY1_PSEAE	A0A8G5M5C2_PSEAI
pilY1_PSEAE	A0A8G5RZN8_PSEAI
pilY1_PSEAE	A0A8G6A0A9_PSEAI
pilY1_PSEAE	A0A8G6L4L7_PSEAI
pilY1_PSEAE	A0A8G6SAG3_PSEAI
pilY1_PSEAE	A0A8G7BQ36_PSEAI
pilY1_PSEAE	A0A8G7CM05_PSEAI
pilY1_PSEAE	A0A8G7CNK4_PSEAI
pilY1_PSEAE	A0A8G7CRE9_PSEAI
pilY1_PSEAE	A0A8G7FPU6_PSEAI
pilY1_PSEAE	A0A8G7GEX4_PSEAI
pilY1_PSEAE	A0A8G7HH05_PSEAI
pilY1_PSEAE	A0A8G7MM01_PSEAI
pilY1_PSEAE	A0A8H2F8U1_PSEAI
pilY1_PSEAE	A0A8I0G9I4_9GAMM
pilY1_PSEAE	A0A8S8W6N8_PSEAI
pilY1_PSEAE	A0A8S8WP80_PSEAI
pilY1_PSEAE	A0A8X8FHN8_PSESP
pilY1_PSEAE	A4VI66_PSEU5
pilY1_PSEAE	A6VBU1_PSEA7
pilY1_PSEAE	V6AM34_PSEAI
traN_F	A0A075MCR9_ECOLX
traN_F	A0A075MDR3_ECOLX
traN_F	A0A075MFZ5_ECOLX
traN_F	A0A077ZLT5_TRITR
traN_F	A0A078LMI1_CITKO
traN_F	A0A080I4L8_ECOLX
traN_F	A0A0C5PXV6_SHIFL
traN_F	A0A0D3RK97_KLEPN
traN_F	A0A0D8W3D4_ECOLX
traN_F	A0A0E0SRI2_ECOLX
traN_F	A0A0E0SRZ3_ECOLX
traN_F	A0A0E1M605_ECOLX
traN_F	A0A0E2KWD4_ECOU3
traN_F	A0A0F1EXB0_ENTCL
traN_F	A0A0F6AWA1_SALT1
traN_F	A0A0G3B3K4_9ENTR
traN_F	A0A0G3VKK3_KLEPN
traN_F	A0A0H0GD78_ECOLX
traN_F	A0A0H2XJ23_ECOK1
traN_F	A0A0H3NZZ2_SALTS
traN_F	A0A0J1YJQ9_ECOLX
traN_F	A0A0K2B7D4_ECOLX
traN_F	A0A0K4VEJ5_ECOLX
traN_F	A0A0M4L908_RAOOR
traN_F	A0A0N7IDD3_9BACT
traN_F	A0A0P7KUT4_ECOLX
traN_F	A0A0P7PXU8_ECOLX
traN_F	A0A0P7RB92_ECOLX
traN_F	A0A0P8S2E4_CITFR
traN_F	A0A0S4G9N0_KLEPN
traN_F	A0A0T9YFA1_SALET
traN_F	A0A0U2ZU13_KLEPN
traN_F	A0A0V9HD14_ECOLX
traN_F	A0A0W3Q0F7_SALER
traN_F	A0A136XUF9_ECOLX
traN_F	A0A140JYA0_ECOLX
traN_F	A0A142CLI7_SHIDY
traN_F	A0A142CMV1_SHIDY
traN_F	A0A152BIK6_ECOLX
traN_F	A0A168QCB1_CITFR
traN_F	A0A168QDH2_KLEPN
traN_F	A0A193M1S1_ECOLX
traN_F	A0A1B1LQ56_KLEPN
traN_F	A0A1C7CPC0_ECOLX
traN_F	A0A1D6XU42_ECOLX
traN_F	A0A1H8XHC5_9ENTR
traN_F	A0A1J0AKE0_ECOLX
traN_F	A0A1J8L981_ECOLX
traN_F	A0A1L4J5X6_ECOLX
traN_F	A0A1L5JRK7_ECOLX
traN_F	A0A1Q1PS76_KLEPN
traN_F	A0A1Q6ANT6_ECOLX
traN_F	A0A1Q6ASH8_ECOLX
traN_F	A0A1Q6AV86_ECOLX
traN_F	A0A1Q6BE50_ECOLX
traN_F	A0A1Q8YU93_9ENTR
traN_F	A0A1Q8YV98_9ENTR
traN_F	A0A1S6L5G9_SALTM
traN_F	A0A1S6XY18_ENTCL
traN_F	A0A1S7H7R4_SALTM
traN_F	A0A1U9Y6G1_KLEVA
traN_F	A0A1V2ST04_ECOLX
traN_F	A0A1X3I3K2_ECOLX
traN_F	A0A1X3J4F2_ECOLX
traN_F	A0A1X3J8D4_ECOLX
traN_F	A0A1X3K034_9ESCH
traN_F	A0A1X3KUC8_ECOLX
traN_F	A0A1X3M1I4_ECOLX
traN_F	A0A1Y1CSP1_ECOLX
traN_F	A0A1Z1V2W5_ECOLX
traN_F	A0A221ZN89_KLEAE
traN_F	A0A236M4N7_ECOLX
traN_F	A0A241PXV9_SALET
traN_F	A0A286NCL9_ENTCL
traN_F	A0A288XGS7_ECOLX
traN_F	A0A291R9S7_KLEPN
traN_F	A0A2A2C9V3_ECOLX
traN_F	A0A2A3UPA1_ECOLX
traN_F	A0A2A3WKY7_ECOLX
traN_F	A0A2A7U839_EDWTA
traN_F	A0A2C5TUW6_MORMO
traN_F	A0A2F0PC70_SERMA
traN_F	A0A2H4TK73_ECOLX
traN_F	A0A2H4ZFT0_9BACT
traN_F	A0A2I2C2K3_ECOLX
traN_F	A0A2I6FMX3_ECOLX
traN_F	A0A2J0PWZ1_9ENTR
traN_F	A0A2J1D8U5_ECOLX
traN_F	A0A2K3TMV3_ECOLX
traN_F	A0A2K9V2A1_ECOLX
traN_F	A0A2P9DUW4_ECOLX
traN_F	A0A2P9DWI5_ECOLX
traN_F	A0A2P9DZC6_ECOLX
traN_F	A0A2R4AAX8_ECOLX
traN_F	A0A2R4NG47_KLEAE
traN_F	A0A2T2XWZ2_9ENTR
traN_F	A0A2U8T1M3_PSEAI
traN_F	A0A2U9QII2_ECOLX
traN_F	A0A2V3ZFW4_9GAMM
traN_F	A0A2W6R6T0_ECOLX
traN_F	A0A2X1LBA8_ECOLX
traN_F	A0A2X3JUC2_ECOLX
traN_F	A0A2X5G5Q7_ECOLX
traN_F	A0A2X5PY91_ECOLX
traN_F	A0A2X7GDD8_ECOLX
traN_F	A0A2Z2DCI7_SHIBO
traN_F	A0A2Z3XEK0_9ENTR
traN_F	A0A2Z3XEP1_9ENTR
traN_F	A0A2Z5DZB0_KLEPN
traN_F	A0A2Z5THP4_ECOLX
traN_F	A0A2Z5WS72_ECOLX
traN_F	A0A315FVL6_SALET
traN_F	A0A332KJU8_KLEPN
traN_F	A0A343YQ83_KLEPN
traN_F	A0A369F704_ECOLX
traN_F	A0A370S7J8_SERFO
traN_F	A0A376HD43_ECOLX
traN_F	A0A376J451_9GAMM
traN_F	A0A376JXI1_ECOLX
traN_F	A0A376JYM9_ECOLX
traN_F	A0A376LQI2_ECOLX
traN_F	A0A376YJ77_ECOLX
traN_F	A0A376ZNX3_ECOLX
traN_F	A0A377BV79_ECOLX
traN_F	A0A377HFW2_ECOLX
traN_F	A0A378CM93_KLEPN
traN_F	A0A385EM53_ECOLX
traN_F	A0A385JKE7_SALTM
traN_F	A0A3E1W0Y0_ECOLX
traN_F	A0A3K0WI63_ECOLX
traN_F	A0A3K8YB89_SALER
traN_F	A0A3L9IFX0_ECOLX
traN_F	A0A3N2RSN9_9ENTR
traN_F	A0A3P5HFV8_ECOLX
traN_F	A0A3Q0N5B7_ECOLX
traN_F	A0A3Q8VND0_ECOLX
traN_F	A0A3R0EF71_SALET
traN_F	A0A3R0JNR7_SHIDY
traN_F	A0A3R0MTV0_ECOLX
traN_F	A0A3R0TYB9_SALER
traN_F	A0A3R0YJ85_SALON
traN_F	A0A3S5FQB3_ECOLX
traN_F	A0A3S8XBD8_SALDE
traN_F	A0A3T0VD38_9ENTR
traN_F	A0A3T6V6A5_ECOLX
traN_F	A0A3T7S3Z1_SALET
traN_F	A0A3U5VAE2_SALET
traN_F	A0A3V0JA32_SALTM
traN_F	A0A3W4GPG2_ECOLX
traN_F	A0A3W5Q4U5_ECOLX
traN_F	A0A3Y4SP99_SALTM
traN_F	A0A3Y4Y504_ECOLX
traN_F	A0A3Y5RRT7_SALET
traN_F	A0A3Z2LRD1_SALNE
traN_F	A0A3Z2P2P0_SALEN
traN_F	A0A3Z6J6C9_ECOLX
traN_F	A0A3Z6KJL6_SALTM
traN_F	A0A3Z6QNT9_SALET
traN_F	A0A403FL22_SALEN
traN_F	A0A410J3Q3_KLEPN
traN_F	A0A418H483_ECOLX
traN_F	A0A426EQI6_ECOLX
traN_F	A0A427MX58_ECOLX
traN_F	A0A443UIQ0_ENTCL
traN_F	A0A443W8Z5_9ENTR
traN_F	A0A443XRD9_ENTCL
traN_F	A0A444R0D3_ECOLX
traN_F	A0A444R3N8_ECOLX
traN_F	A0A444R3U7_ECOLX
traN_F	A0A478LND8_ECOLX
traN_F	A0A482M6K2_KLEPN
traN_F	A0A4C9C0E7_ECOLX
traN_F	A0A4C9LLB1_ECOLX
traN_F	A0A4D1P4L5_ECOLX
traN_F	A0A4D9F4H9_ECOLX
traN_F	A0A4D9I3T6_ECOLX
traN_F	A0A4D9XMT1_ECOLX
traN_F	A0A4D9XS16_ECOLX
traN_F	A0A4D9XV51_ECOLX
traN_F	A0A4D9XZ64_ECOLX
traN_F	A0A4D9Y3G4_ECOLX
traN_F	A0A4P7Y1R4_SALET
traN_F	A0A4Q0WKU3_ECOLX
traN_F	A0A4Q2FDR4_STROR
traN_F	A0A4T5KAI8_ECOLX
traN_F	A0A4U9UH13_ECOLX
traN_F	A0A4Y1N974_SALET
traN_F	A0A4Y1YQW5_ECOLX
traN_F	A0A4Y9WRE9_ECOLX
traN_F	A0A509DNL1_ECOLX
traN_F	A0A515D5U3_SERLI
traN_F	A0A516II18_SALET
traN_F	A0A5B9AGH9_ECOLX
traN_F	A0A5C2D0I4_SALEN
traN_F	A0A5D8M5R4_ECOLX
traN_F	A0A5E8NQN2_ECOLX
traN_F	A0A5F1PMK9_ECOLX
traN_F	A0A5F1PMT3_ECOLX
traN_F	A0A5F1Q4A2_ECOLX
traN_F	A0A5H6TC95_SALAB
traN_F	A0A5H8S1V2_SALET
traN_F	A0A5I1M8S3_SALVI
traN_F	A0A5I3ELL0_SALET
traN_F	A0A5I5BHG0_SALET
traN_F	A0A5I6Q497_SALET
traN_F	A0A5M7L358_9GAMM
traN_F	A0A5P0JGZ2_ECOLX
traN_F	A0A5Q8ANQ9_ECOLX
traN_F	A0A5Q8APC1_ECOLX
traN_F	A0A5R1LZ45_ECOLX
traN_F	A0A5R1MD12_ECOLX
traN_F	A0A5S9LZ77_9ENTR
traN_F	A0A5T3E7E6_SALER
traN_F	A0A5T3RDF1_SALER
traN_F	A0A5T4MSW9_SALER
traN_F	A0A5U1RBN1_SALER
traN_F	A0A5U3R4B1_SALER
traN_F	A0A5U3VAT4_SALER
traN_F	A0A5U7RZN8_SALER
traN_F	A0A5U8K977_SALET
traN_F	A0A5U8K9X0_SALET
traN_F	A0A5U8KAA3_SALET
traN_F	A0A5U8V869_SALTM
traN_F	A0A5U8V8H8_SALTM
traN_F	A0A5U9BJV7_SALET
traN_F	A0A5U9SVY6_SALET
traN_F	A0A5V0BUY9_SALEN
traN_F	A0A5V0QAM2_SALER
traN_F	A0A5V0YX24_SALER
traN_F	A0A5V1PI86_SALER
traN_F	A0A5V2QWV5_SALER
traN_F	A0A5V7V285_SALHA
traN_F	A0A5V8HI92_SALEN
traN_F	A0A5V8IXK8_SALET
traN_F	A0A5V9BUR4_SALET
traN_F	A0A5W0LAB7_SALET
traN_F	A0A5W1G0K3_SALTM
traN_F	A0A5W2DWR7_SALTM
traN_F	A0A5W5W436_SALNE
traN_F	A0A5W5ZUL6_SALTM
traN_F	A0A5W6KPN0_SALTM
traN_F	A0A5W8FXF6_SALON
traN_F	A0A5X2B353_SALET
traN_F	A0A5X4PKU9_SALET
traN_F	A0A5X4XE10_SALET
traN_F	A0A5X6SRK2_SALTM
traN_F	A0A5X7K833_SALET
traN_F	A0A5Y0S6A3_SALNE
traN_F	A0A5Y1YF31_SALDZ
traN_F	A0A5Y2EG79_SALET
traN_F	A0A5Y2LX60_SALER
traN_F	A0A5Y2NFT1_SALET
traN_F	A0A5Y3LD82_SALEN
traN_F	A0A5Y3N018_SALER
traN_F	A0A5Y3V2C2_SALER
traN_F	A0A5Y3XES0_SALER
traN_F	A0A5Y4VI11_SALTM
traN_F	A0A5Y4YV53_SALER
traN_F	A0A5Y5JWW8_SALER
traN_F	A0A5Y6JSS0_SALER
traN_F	A0A5Z7TD80_SALER
traN_F	A0A5Z8QTD9_SALET
traN_F	A0A609J3X6_SALTM
traN_F	A0A611L822_SALTM
traN_F	A0A612GMS0_SALET
traN_F	A0A616JDI6_SALET
traN_F	A0A619AKG6_SALET
traN_F	A0A619I134_SALER
traN_F	A0A621VD49_SALER
traN_F	A0A625MFI8_SALTM
traN_F	A0A625MH78_SALTM
traN_F	A0A626G2P7_SALTM
traN_F	A0A626RE66_SALET
traN_F	A0A627FC09_SALER
traN_F	A0A627FCI1_SALER
traN_F	A0A628KAE5_SALEN
traN_F	A0A629HJT6_SALSE
traN_F	A0A629S572_SALMO
traN_F	A0A633B0G8_SALER
traN_F	A0A633B174_SALER
traN_F	A0A633J716_SALER
traN_F	A0A633RFA4_SALER
traN_F	A0A635QGT8_SALTM
traN_F	A0A636DMA8_SALTM
traN_F	A0A636IMR0_SALNE
traN_F	A0A647ANC8_SALTM
traN_F	A0A648FGC6_SALER
traN_F	A0A650ERN7_ECOLX
traN_F	A0A655C8M1_SALET
traN_F	A0A655EEL9_SALET
traN_F	A0A657EY16_SALEN
traN_F	A0A660G2W6_9ENTR
traN_F	A0A6C0L6G6_9ENTR
traN_F	A0A6C7AT05_SALTU
traN_F	A0A6C7H6F5_ECOLX
traN_F	A0A6C7I725_SALTD
traN_F	A0A6C8RNC9_ECOLX
traN_F	A0A6C8S461_ECOLX
traN_F	A0A6C8YIJ9_SALER
traN_F	A0A6C9JQQ8_ECOLX
traN_F	A0A6C9QI82_ECOLX
traN_F	A0A6C9SZE6_ECOLX
traN_F	A0A6D0DM59_ECOLX
traN_F	A0A6D0L1T9_ECOLX
traN_F	A0A6D0XM02_ECOLX
traN_F	A0A6D1LS45_ECOLX
traN_F	A0A6G4CJH8_ECOLX
traN_F	A0A6G4KE44_ECOLX
traN_F	A0A6G6AQQ8_9ENTR
traN_F	A0A6G8FDV1_ECOLX
traN_F	A0A6H0A0K3_ECOLX
traN_F	A0A6H2GRQ4_9ESCH
traN_F	A0A6I5JJE9_BACCE
traN_F	A0A6L6I2Z9_ECOLX
traN_F	A0A6L8VSE2_ECOLX
traN_F	A0A6L9A8Q1_ECOLX
traN_F	A0A6L9A8X4_ECOLX
traN_F	A0A6L9AC83_ECOLX
traN_F	A0A6N8QU27_ECOLX
traN_F	A0A6W0H6N9_SALET
traN_F	A0A6X6QVN7_SALEN
traN_F	A0A6X7AJW3_SALEN
traN_F	A0A6X7K7D4_SALET
traN_F	A0A6X8DWS9_SALET
traN_F	A0A6X9J3L0_SALEN
traN_F	A0A6Y0EBP8_SALEN
traN_F	A0A6Y0UGW3_SALEN
traN_F	A0A6Y2KNN5_SALDZ
traN_F	A0A6Y2ZRQ3_SALVI
traN_F	A0A6Y3HDD0_SALDU
traN_F	A0A6Y4VJ63_SALET
traN_F	A0A702DA20_SALDZ
traN_F	A0A705W629_SALER
traN_F	A0A706FSA0_SALTM
traN_F	A0A706JLM3_SALTM
traN_F	A0A707MXS1_SALTM
traN_F	A0A707MYV7_SALTM
traN_F	A0A708DET7_SALTM
traN_F	A0A708VKX2_SALTM
traN_F	A0A709CBB5_SALTM
traN_F	A0A711EE89_SALET
traN_F	A0A711KI56_SALET
traN_F	A0A718Y463_SALTS
traN_F	A0A719C973_SALTS
traN_F	A0A723D208_SALER
traN_F	A0A723N3E8_SALER
traN_F	A0A723YSC1_SALER
traN_F	A0A724IQH3_SALEP
traN_F	A0A724ZT42_SALEP
traN_F	A0A728QD32_SALER
traN_F	A0A730EDG6_SALON
traN_F	A0A730USU1_SALET
traN_F	A0A734BUR8_SALET
traN_F	A0A736QV06_SALEN
traN_F	A0A737F8H5_SALGL
traN_F	A0A738AXE1_SALAE
traN_F	A0A738YT71_SALET
traN_F	A0A739VR77_SALET
traN_F	A0A742ZNJ4_SALER
traN_F	A0A743YHE4_SALER
traN_F	A0A744CFU4_SALER
traN_F	A0A745I4E5_SALER
traN_F	A0A746ETN4_SALER
traN_F	A0A748F1L6_SALTI
traN_F	A0A748X4C8_SALER
traN_F	A0A749C0D4_SALER
traN_F	A0A751VLQ4_SALER
traN_F	A0A753L983_SALET
traN_F	A0A753XWT3_SALER
traN_F	A0A753YC69_SALER
traN_F	A0A754E3N9_SALER
traN_F	A0A754PKG3_SALER
traN_F	A0A756I8J3_SALER
traN_F	A0A758JEW8_SALER
traN_F	A0A758XZM8_SALER
traN_F	A0A759QZ43_SALER
traN_F	A0A759YM00_SALER
traN_F	A0A760NI90_SALER
traN_F	A0A761YGE1_SALER
traN_F	A0A762J9I5_SALER
traN_F	A0A763SUI3_SALER
traN_F	A0A763SYY0_SALER
traN_F	A0A764Z204_SALER
traN_F	A0A767XXK4_SALTM
traN_F	A0A775TLP8_ECOLX
traN_F	A0A776L123_ECOLX
traN_F	A0A777Y4C3_ECOLX
traN_F	A0A780AWK8_ECOLX
traN_F	A0A782UU93_ECOLX
traN_F	A0A783TMR6_ECOLX
traN_F	A0A797SP66_ECOLX
traN_F	A0A7A2HK41_ECOLX
traN_F	A0A7A2LHV3_ECOLX
traN_F	A0A7A3JN28_ECOLX
traN_F	A0A7A6MSF1_ECOLX
traN_F	A0A7A6RQ46_ECOLX
traN_F	A0A7A6VI50_ECOLX
traN_F	A0A7A6Y7N0_ECOLX
traN_F	A0A7A6ZGT5_ECOLX
traN_F	A0A7A6ZP14_ECOLX
traN_F	A0A7A6ZR74_ECOLX
traN_F	A0A7G3L5M1_KLEPN
traN_F	A0A7G8AJ76_ECOLX
traN_F	A0A7H4YR95_ECOLX
traN_F	A0A7H9GIS5_9ENTR
traN_F	A0A7I0KPZ1_ECOLX
traN_F	A0A7I0L244_ECOLX
traN_F	A0A7I6Y074_9ENTR
traN_F	A0A7I6YE72_9ENTR
traN_F	A0A7I7AGI1_RAOPL
traN_F	A0A7I7E874_9ENTR
traN_F	A0A7I9AYE5_ECOLX
traN_F	A0A7L5VQ60_ECOLX
traN_F	A0A7L9UZV4_SALET
traN_F	A0A7R7EB02_CITFR
traN_F	A0A7U8W5J5_ECOLX
traN_F	A0A7U9A0J2_ECOLX
traN_F	A0A7U9BDH9_ECOLX
traN_F	A0A7U9BH48_ECOLX
traN_F	A0A7U9DIM4_9ESCH
traN_F	A0A7W3HGC1_ENTAS
traN_F	A0A7W4PUK0_9ESCH
traN_F	A0A7X5JRF0_9ENTR
traN_F	A0A7Z1D4G0_SHISO
traN_F	A0A7Z1IXZ6_SHIFL
traN_F	A0A7Z1PXS8_SALET
traN_F	A0A7Z1Q7B7_SALET
traN_F	A0A7Z1Q9F4_SALET
traN_F	A0A7Z1Q9P1_SALET
traN_F	A0A7Z1QAK8_SALET
traN_F	A0A7Z1TGK2_SALET
traN_F	A0A7Z7YI94_9ESCH
traN_F	A0A7Z8BC30_SHISO
traN_F	A0A7Z8DNW4_SHIFL
traN_F	A0A7Z8DWP8_9ESCH
traN_F	A0A809SXU3_KLEPN
traN_F	A0A811VY31_ECOLX
traN_F	A0A822UGX9_ECOLX
traN_F	A0A826J2J8_ECOLX
traN_F	A0A826LAB9_ECOLX
traN_F	A0A826PU01_ECOLX
traN_F	A0A826TQP2_ECOLX
traN_F	A0A826W511_ECOLX
traN_F	A0A826YLF9_ECOLX
traN_F	A0A826Z314_ECOLX
traN_F	A0A826ZQI1_ECOLX
traN_F	A0A827G000_ECOLX
traN_F	A0A827G5F2_ECOLX
traN_F	A0A827GBT7_ECOLX
traN_F	A0A827KHK5_ECOLX
traN_F	A0A827L4Y0_ECOLX
traN_F	A0A827QDF9_ECOLX
traN_F	A0A827S735_ECOLX
traN_F	A0A827UKA2_ECOLX
traN_F	A0A827Y6M1_ECOLX
traN_F	A0A828A917_ECOLX
traN_F	A0A828A9H3_ECOLX
traN_F	A0A828AAL2_ECOLX
traN_F	A0A828AB08_ECOLX
traN_F	A0A828ACM9_ECOLX
traN_F	A0A828ANL0_ECOLX
traN_F	A0A828C1P7_ECOLX
traN_F	A0A828GJP2_ECOLX
traN_F	A0A828HA10_ECOLX
traN_F	A0A828HQ90_ECOLX
traN_F	A0A828LAW2_ECOLX
traN_F	A0A828PAM3_ECOLX
traN_F	A0A828UE83_ECOLX
traN_F	A0A829C8U5_ECOLX
traN_F	A0A829CIR3_ECOLX
traN_F	A0A829FWZ3_ECOLX
traN_F	A0A829IS07_ECOLX
traN_F	A0A829LE39_ECOLX
traN_F	A0A830SL70_ECOLX
traN_F	A0A830V646_ECOLX
traN_F	A0A836N6D1_ECOLX
traN_F	A0A836Z903_ECOLX
traN_F	A0A837B2N5_ECOLX
traN_F	A0A837F5L8_9ENTR
traN_F	A0A837Z751_9ENTR
traN_F	A0A839BL69_9ESCH
traN_F	A0A851GBS8_9ENTR
traN_F	A0A873AM29_9ENTR
traN_F	A0A890DFB7_ECOLX
traN_F	A0A890DGD7_ECOLX
traN_F	A0A896ZFR1_SHIFL
traN_F	A0A8A5TLU7_KLEPN
traN_F	A0A8B2S835_9ENTR
traN_F	A0A8B3KAE2_SHISO
traN_F	A0A8B4L8J7_SHISO
traN_F	A0A8B5KE39_ECOLX
traN_F	A0A8B5RIE5_ECOLX
traN_F	A0A8B6AES0_9ENTR
traN_F	A0A8B6B930_ECOLX
traN_F	A0A8D4ZW19_SALET
traN_F	A0A8D5A0D5_SALET
traN_F	A0A8D5CBC9_SALET
traN_F	A0A8D5R1S2_ECOLX
traN_F	A0A8D9UMN0_9ESCH
traN_F	A0A8E0IUJ6_ECOLX
traN_F	A0A8E0KC01_ECOLX
traN_F	A0A8E2SEF5_ECOLX
traN_F	A0A8E5X922_9ENTR
traN_F	A0A8E6L841_KLEPN
traN_F	A0A8E6NG70_SALTM
traN_F	A0A8E6NW07_9ESCH
traN_F	A0A8E7NAB2_SALET
traN_F	A0A8E7W048_SALER
traN_F	A0A8F2ZU23_SALET
traN_F	A0A8F4PY02_ECOLX
traN_F	A0A8F6FYD1_KLEPN
traN_F	A0A8F8I3V7_ECOLX
traN_F	A0A8F9BQL7_ECOLX
traN_F	A0A8F9I5N3_ECOLX
traN_F	A0A8G1ILC0_SALER
traN_F	A0A8G1N0E2_ECOLX
traN_F	A0A8G1WCE0_ECOLX
traN_F	A0A8G2HV28_ECOLX
traN_F	A0A8G7WDL6_ECOLX
traN_F	A0A8G8C7K4_ECOLX
traN_F	A0A8G8LCW7_ECOLX
traN_F	A0A8G8T3V9_ECOLX
traN_F	A0A8G8YHD2_ECOLX
traN_F	A0A8G9MYN6_ECOLX
traN_F	A0A8G9NE39_ECOLX
traN_F	A0A8G9WD81_ECOLX
traN_F	A0A8H0A4K2_ECOLX
traN_F	A0A8H0E3P5_ECOLX
traN_F	A0A8H0EIJ8_ECOLX
traN_F	A0A8H0IDE0_ECOLX
traN_F	A0A8H0JLJ4_ECOLX
traN_F	A0A8H0MHX0_ECOLX
traN_F	A0A8H0N8H1_ECOLX
traN_F	A0A8H0QPT3_ECOLX
traN_F	A0A8H0R2G0_ECOLX
traN_F	A0A8H0R9F8_ECOLX
traN_F	A0A8H0S778_ECOLX
traN_F	A0A8H1KBS9_ECOLX
traN_F	A0A8H1LRU7_ECOLX
traN_F	A0A8H1N5R4_ECOLX
traN_F	A0A8H1Q5Y9_ECOLX
traN_F	A0A8H1QEM8_ECOLX
traN_F	A0A8H1R7D8_ECOLX
traN_F	A0A8H9A954_ECOLX
traN_F	A0A8H9AI14_SHIBO
traN_F	A0A8H9AVY1_ECOLX
traN_F	A0A8H9DCM3_SHIFL
traN_F	A0A8H9DJA8_SHIDY
traN_F	A0A8H9DVV6_ECOLX
traN_F	A0A8H9EAK4_ECOLX
traN_F	A0A8H9EFM2_9ESCH
traN_F	A0A8H9EYH3_9ESCH
traN_F	A0A8H9EYM5_9ESCH
traN_F	A0A8H9JLW7_ECOLX
traN_F	A0A8H9W350_ECOLX
traN_F	A0A8H9XSA0_ECOLX
traN_F	A0A8I0LLT9_ENTAG
traN_F	A0A8S7B2M0_ECOLX
traN_F	A0A8S7BLA5_ECOLX
traN_F	A0A8S7E542_ECOLX
traN_F	A0A8S7FJY4_ECOLX
traN_F	A0A8S7IE61_ECOLX
traN_F	A0A8S7J7X2_ECOLX
traN_F	A0A8S7JZH5_ECOLX
traN_F	A0A8S7NK67_ECOLX
traN_F	A0A8S7PKW9_ECOLX
traN_F	A0A8S7QR41_ECOLX
traN_F	A0A8S7R2L8_ECOLX
traN_F	A0A8S7RGK4_ECOLX
traN_F	A0A8S7SR28_ECOLX
traN_F	A0A8S7T3L5_ECOLX
traN_F	A0A8S7T7F2_ECOLX
traN_F	A0A8S7V8B8_ECOLX
traN_F	A0A8S7VTN9_ECOLX
traN_F	A0A8S7WFH5_ECOLX
traN_F	A0A8S7XPK8_ECOLX
traN_F	A0A8T5Z8L4_ECOLX
traN_F	A0A8T6BD93_ECOLX
traN_F	A0A8T6PXH9_ECOLX
traN_F	B1LRK3_ECOSM
traN_F	B1P7S1_ECOLX
traN_F	B1VC99_ECOLX
traN_F	B7LI80_ECO45
traN_F	B7LJ39_ECOLU
traN_F	B7UTK4_ECO27
traN_F	C5ZZL2_ECOLX
traN_F	C8CGR3_ECOLX
traN_F	D2D9D0_KLEPN
traN_F	D2U5W3_SHISO
traN_F	D3H570_ECO44
traN_F	D4HR01_KLEPN
traN_F	D8ED28_ECOLX
traN_F	D9Z4V3_ECOLX
traN_F	D9Z592_ECOLX
traN_F	E1IWJ5_ECOLX
traN_F	E1JE82_ECOLX
traN_F	E1QMM0_SALET
traN_F	E3PYJ3_ECOLX
traN_F	E6BS83_ECOLX
traN_F	E8XLE0_SALT4
traN_F	E9TIV9_ECOLX
traN_F	E9XTQ2_ECOLX
traN_F	F0JY02_ESCFE
traN_F	F4SZP9_ECOLX
traN_F	F4T8W7_ECOLX
traN_F	F4TE91_ECOLX
traN_F	F4V9V3_ECOLX
traN_F	G3G3S6_ECOLX
traN_F	G3K1J3_ECOLX
traN_F	G7QEE8_ECOLX
traN_F	G7YYF4_CLOSI
traN_F	G9G1C4_ECOLX
traN_F	H1ZXS6_ECOLX
traN_F	H9ACD0_SALPU
traN_F	H9L4E7_SALTM
traN_F	H9TJI6_SALET
traN_F	I1WZR8_ECOLX
traN_F	I3W016_ECOLX
traN_F	I3W7D0_SALGL
traN_F	K4NSI9_9BACT
traN_F	K4W783_ECOLX
traN_F	K4WEQ9_ECOLX
traN_F	K4WHA5_ECOLX
traN_F	K4XEJ5_ECOLX
traN_F	K4XII3_ECOLX
traN_F	K4XL66_ECOLX
traN_F	L3PHH1_ECOLX
traN_F	L4J018_ECOLX
traN_F	O32544_ECOLX
traN_F	Q08JF7_ECOLX
traN_F	Q0E821_ECOLX
traN_F	Q0H090_ECOLX
traN_F	Q1R1R5_ECOUT
traN_F	Q2TTZ7_ECOLX
traN_F	Q4L1T1_SALDU
traN_F	Q5JBN7_ECOLX
traN_F	Q65AG8_YERPE
traN_F	Q6SJ08_ECOLX
traN_F	Q84A27_ECOLX
traN_F	Q93GM7_SALTY
traN_F	Q9WTC3_SHIFL
traN_F	S1ELC6_ECOLX
traN_F	S1NHE0_ECOLX
traN_F	S4VE34_9BACT
traN_F	V0A934_ECOLX
traN_F	V0VCC5_ECOLX
traN_F	V0X101_ECOLX
traN_F	V0Y244_ECOLX
traN_F	V0YU13_ECOLX
traN_F	W0FWP9_ECOLX
traN_F	W1F9Z0_ECOLX
traN_F	W1WPW9_ECOLX
traN_F	W1X825_ECOLX
traN_F	W1XDX5_ECOLX
traN_F	W1Y425_9ZZZZ
traN_F	W7NCA2_9ENTR
traN_F	W8E6J0_KLEPN

## Sheet: Toxins
TA_ID	Organism	Toxin		Obtained from TADB
T6083	PseudomonasputidaKT2440(chromosome)	PP_1586
T6096	StreptococcussuisSC070731(chromosome)	NJAUSS_0644
T6292	EscherichiacoliEC302/04(chromosome)	C381_p00565
T6293	EscherichiacoliEC302/04(chromosome)	C381_p00140
T6294	EscherichiacoliEC302/04(chromosome)	C381_p00185
T6295	EscherichiacoliEC302/04(chromosome)	C381_p00205
T6296	EscherichiacoliEC302/04(chromosome)	C381_p00900
T6125	Bacteroidesuniformis(plasmidpBUN24)	CDS_3
T6037	Enterococcusfaecium(ICE)	Orf75
T6036	Streptococcuspneumoniae(ICE)	Orf8
T6092	Staphylococcusaureus(Insertion)	zeta
T6090	Staphylococcusequorum(TAlocus)	mazEsa
T6084	Pseudomonasaeruginosa(plasmidpNOR-2000)	Tox1
T6085	Pseudomonasaeruginosa(plasmidpNOR-2000)	t/at2
T6114	unculturedbacteriumclone93(metagenomicgenecluster)
T6095	Providenciarettgeri(plasmidpPrY2001)	09AY2001NDM_044
T6081	Acinetobacterbaumannii(plasmidAbATCC223)	ORF4
T6082	Acinetobacterbaumannii(plasmidAbATCC329)	ORF3
T6025	Pseudomonassp.LM13(transposon)	ORF3
T6291	LactobacillusplantarumplasmidpCD033(plasmid)	AKD43743
T1321	ThermotogamaritimaMSB8(chromosome)	TM0614
T1322	ThermotogamaritimaMSB8(chromosome)	TM0648
T1323	ThermotogamaritimaMSB8(chromosome)	TM1001
T1324	ThermotogamaritimaMSB8(chromosome)	TM1312
T1325	ThermotogamaritimaMSB8(chromosome)	TM1313
T1	AeropyrumpernixK1(chromosome)	APE_0273
T2	AeropyrumpernixK1(chromosome)	APE_0276.1
T3	AeropyrumpernixK1(chromosome)	APE_0279.1
T4	AeropyrumpernixK1(chromosome)	APE_0471a
T5	AeropyrumpernixK1(chromosome)	APE_0761.1
T6	AeropyrumpernixK1(chromosome)	APE_0890
T7	AeropyrumpernixK1(chromosome)	APE_1209b
T8	AeropyrumpernixK1(chromosome)	APE_1270.1
T9	AeropyrumpernixK1(chromosome)	APE_2616
T10	AeropyrumpernixK1(chromosome)	APE_2617.1
T11	AeropyrumpernixK1(chromosome)	APE_2617b
T12	AeropyrumpernixK1(chromosome)	APE_2617d
T979	PyrococcusabyssiGE5(chromosome)	PAB2340
T980	PyrococcusabyssiGE5(chromosome)	PAB2325
T981	PyrococcusabyssiGE5(chromosome)	PAB2271
T982	PyrococcusabyssiGE5(chromosome)	PAB2079
T983	PyrococcusabyssiGE5(chromosome)	PAB0520
T984	PyrococcusabyssiGE5(chromosome)	PAB7218
T985	PyrococcusabyssiGE5(chromosome)	PAB1755
T986	PyrococcusabyssiGE5(chromosome)	PAB1672
T987	PyrococcusabyssiGE5(chromosome)	PAB0786
T988	PyrococcusabyssiGE5(chromosome)	PAB1545
T989	PyrococcusabyssiGE5(chromosome)	PAB0859
T990	PyrococcusabyssiGE5(chromosome)	PAB0898
T991	PyrococcusabyssiGE5(chromosome)	PAB0900
T992	PyrococcusabyssiGE5(chromosome)	PAB1216
T1065	HaemophilusinfluenzaeRdKW20(chromosome)	HI0073
T1066	HaemophilusinfluenzaeRdKW20(chromosome)	HI0322
T1067	HaemophilusinfluenzaeRdKW20(chromosome)	HI0660
T1068	HaemophilusinfluenzaeRdKW20(chromosome)	HI0666
T1069	HaemophilusinfluenzaeRdKW20(chromosome)	HI0711
T1070	HaemophilusinfluenzaeRdKW20(chromosome)	HI0947
T1071	HaemophilusinfluenzaeRdKW20(chromosome)	HI1250
T1072	HaemophilusinfluenzaeRdKW20(chromosome)	HI1419
T6156	HaemophilusinfluenzaeRdKW20(chromosome)	HI0450
T13	MethanocaldococcusjannaschiiDSM2661(chromosome)	MJ_0071
T14	MethanocaldococcusjannaschiiDSM2661(chromosome)	MJ_0126
T15	MethanocaldococcusjannaschiiDSM2661(chromosome)	MJ_0128
T16	MethanocaldococcusjannaschiiDSM2661(chromosome)	MJ_0141
T17	MethanocaldococcusjannaschiiDSM2661(chromosome)	MJ_0435
T18	MethanocaldococcusjannaschiiDSM2661(chromosome)	MJ_0604
T19	MethanocaldococcusjannaschiiDSM2661(chromosome)	MJ_0974
T20	MethanocaldococcusjannaschiiDSM2661(chromosome)	MJ_1121
T21	MethanocaldococcusjannaschiiDSM2661(chromosome)	MJ_1173
T22	MethanocaldococcusjannaschiiDSM2661(chromosome)	MJ_1215
T23	MethanocaldococcusjannaschiiDSM2661(chromosome)	MJ_1305
T24	MethanocaldococcusjannaschiiDSM2661(chromosome)	MJ_1379
T25	MethanocaldococcusjannaschiiDSM2661(chromosome)	MJ_1547
T26	MethanocaldococcusjannaschiiDSM2661(chromosome)	MJ_1680
T958	Synechocystissp.PCC6803(chromosome)	sll1400
T959	Synechocystissp.PCC6803(chromosome)	slr0725
T961	Synechocystissp.PCC6803(chromosome)	ssr1766
T962	Synechocystissp.PCC6803(chromosome)	ssl2923
T963	Synechocystissp.PCC6803(chromosome)	sll1504
T964	Synechocystissp.PCC6803(chromosome)	slr1767
T965	Synechocystissp.PCC6803(chromosome)	sll1912
T966	Synechocystissp.PCC6803(chromosome)	slr1210
T967	Synechocystissp.PCC6803(chromosome)	sll1715
T968	Synechocystissp.PCC6803(chromosome)	sll1130
T969	Synechocystissp.PCC6803(chromosome)	ssl2749
T970	Synechocystissp.PCC6803(chromosome)	slr1327
T971	Synechocystissp.PCC6803(chromosome)	sll1225
T972	Synechocystissp.PCC6803(chromosome)	sll1092
T973	Synechocystissp.PCC6803(chromosome)	slr0771
T974	Synechocystissp.PCC6803(chromosome)	sll0690
T976	Synechocystissp.PCC6803(chromosome)	sll0658
T977	Synechocystissp.PCC6803(chromosome)	sll0525
T978	Synechocystissp.PCC6803(chromosome)	slr0664
T1038	Escherichiacolistr.K-12substr.MG1655(chromosome)	b0225
T1039	Escherichiacolistr.K-12substr.MG1655(chromosome)	b4532
T1040	Escherichiacolistr.K-12substr.MG1655(chromosome)	b1507
T1041	Escherichiacolistr.K-12substr.MG1655(chromosome)	b1563
T1043	Escherichiacolistr.K-12substr.MG1655(chromosome)	b4539
T1044	Escherichiacolistr.K-12substr.MG1655(chromosome)	b2782
T1045	Escherichiacolistr.K-12substr.MG1655(chromosome)	b3022
T1046	Escherichiacolistr.K-12substr.MG1655(chromosome)	b3083
T1047	Escherichiacolistr.K-12substr.MG1655(chromosome)	b3130
T1048	Escherichiacolistr.K-12substr.MG1655(chromosome)	b3361
T1049	Escherichiacolistr.K-12substr.MG1655(chromosome)	b4225
T6077	Escherichiacolistr.K-12substr.MG1655(chromosome)	b2630
T6100	Escherichiacolistr.K-12substr.MG1655(chromosome)	b3022
T6157	Escherichiacolistr.K-12substr.MG1655(chromosome)	b0233
T6279	Escherichiacolistr.K-12substr.MG1655(chromosome)	b4566
T27	Helicobacterpylori26695(chromosome)	HP0892
T28	Helicobacterpylori26695(chromosome)	HP0894
T6116	Helicobacterpylori26695(chromosome)	HP0894
T6127	Helicobacterpylori26695(chromosome)	HP0892
T29	Methanothermobacterthermautotrophicusstr.DeltaH(chromosome)	MTH305
T30	Methanothermobacterthermautotrophicusstr.DeltaH(chromosome)	MTH408
T31	Methanothermobacterthermautotrophicusstr.DeltaH(chromosome)	MTH464
T32	ArchaeoglobusfulgidusDSM4304(chromosome)	AF0065
T33	ArchaeoglobusfulgidusDSM4304(chromosome)	AF0099
T34	ArchaeoglobusfulgidusDSM4304(chromosome)	AF0296
T35	ArchaeoglobusfulgidusDSM4304(chromosome)	AF0299
T36	ArchaeoglobusfulgidusDSM4304(chromosome)	AF0300
T37	ArchaeoglobusfulgidusDSM4304(chromosome)	AF0313
T38	ArchaeoglobusfulgidusDSM4304(chromosome)	AF0315
T39	ArchaeoglobusfulgidusDSM4304(chromosome)	AF0315
T40	ArchaeoglobusfulgidusDSM4304(chromosome)	AF0320
T41	ArchaeoglobusfulgidusDSM4304(chromosome)	AF0594
T42	ArchaeoglobusfulgidusDSM4304(chromosome)	AF0598
T43	ArchaeoglobusfulgidusDSM4304(chromosome)	AF0948
T44	ArchaeoglobusfulgidusDSM4304(chromosome)	AF1075
T45	ArchaeoglobusfulgidusDSM4304(chromosome)	AF1075
T46	ArchaeoglobusfulgidusDSM4304(chromosome)	AF1077
T47	ArchaeoglobusfulgidusDSM4304(chromosome)	AF1080
T48	ArchaeoglobusfulgidusDSM4304(chromosome)	AF1080
T49	ArchaeoglobusfulgidusDSM4304(chromosome)	AF1086m
T50	ArchaeoglobusfulgidusDSM4304(chromosome)	AF1089
T51	ArchaeoglobusfulgidusDSM4304(chromosome)	AF1091
T52	ArchaeoglobusfulgidusDSM4304(chromosome)	AF1093
T53	ArchaeoglobusfulgidusDSM4304(chromosome)	AF1479
T54	ArchaeoglobusfulgidusDSM4304(chromosome)	AF1480
T55	ArchaeoglobusfulgidusDSM4304(chromosome)	AF1586
T56	ArchaeoglobusfulgidusDSM4304(chromosome)	AF1613
T57	ArchaeoglobusfulgidusDSM4304(chromosome)	AF1683
T58	ArchaeoglobusfulgidusDSM4304(chromosome)	AF1690
T59	ArchaeoglobusfulgidusDSM4304(chromosome)	AF1711
T60	ArchaeoglobusfulgidusDSM4304(chromosome)	AF1996
T61	ArchaeoglobusfulgidusDSM4304(chromosome)	AF2012
T62	ArchaeoglobusfulgidusDSM4304(chromosome)	AF2168
T63	ArchaeoglobusfulgidusDSM4304(chromosome)	AF2190
T64	ArchaeoglobusfulgidusDSM4304(chromosome)	AF2213
T65	ArchaeoglobusfulgidusDSM4304(chromosome)	AF2304
T66	ArchaeoglobusfulgidusDSM4304(chromosome)	AF2342
T67	ArchaeoglobusfulgidusDSM4304(chromosome)	AF2360
T68	ArchaeoglobusfulgidusDSM4304(chromosome)	AF2432
T69	HelicobacterpyloriJ99(chromosome)	jhp0831
T71	HelicobacterpyloriJ99(chromosome)	jhp0961
T850	PyrococcushorikoshiiOT3(chromosome)	PH0098
T851	PyrococcushorikoshiiOT3(chromosome)	PH0389
T852	PyrococcushorikoshiiOT3(chromosome)	PH0403
T853	PyrococcushorikoshiiOT3(chromosome)	PHS013
T854	PyrococcushorikoshiiOT3(chromosome)	PH0458
T855	PyrococcushorikoshiiOT3(chromosome)	PH0469
T856	PyrococcushorikoshiiOT3(chromosome)	PH0500
T857	PyrococcushorikoshiiOT3(chromosome)	PH0687.2n
T858	PyrococcushorikoshiiOT3(chromosome)	PH0696
T859	PyrococcushorikoshiiOT3(chromosome)	PH0708
T860	PyrococcushorikoshiiOT3(chromosome)	PHS027.1n
T861	PyrococcushorikoshiiOT3(chromosome)	PHS031a
T862	PyrococcushorikoshiiOT3(chromosome)	PH1295.3n
T72	MycobacteriumtuberculosisH37Rv(chromosome)	Rv0240
T73	MycobacteriumtuberculosisH37Rv(chromosome)	Rv0299
T74	MycobacteriumtuberculosisH37Rv(chromosome)	Rv0301
T75	MycobacteriumtuberculosisH37Rv(chromosome)	Rv0549c
T76	MycobacteriumtuberculosisH37Rv(chromosome)	Rv0582
T77	MycobacteriumtuberculosisH37Rv(chromosome)	Rv0595c
T78	MycobacteriumtuberculosisH37Rv(chromosome)	Rv0598c
T79	MycobacteriumtuberculosisH37Rv(chromosome)	Rv0609
T80	MycobacteriumtuberculosisH37Rv(chromosome)	Rv0617
T81	MycobacteriumtuberculosisH37Rv(chromosome)	Rv0624
T82	MycobacteriumtuberculosisH37Rv(chromosome)	Rv0627
T83	MycobacteriumtuberculosisH37Rv(chromosome)	Rv0656c
T84	MycobacteriumtuberculosisH37Rv(chromosome)	Rv0659c
T85	MycobacteriumtuberculosisH37Rv(chromosome)	Rv0661c
T86	MycobacteriumtuberculosisH37Rv(chromosome)	Rv0665
T87	MycobacteriumtuberculosisH37Rv(chromosome)	Rv0749
T88	MycobacteriumtuberculosisH37Rv(chromosome)	Rv0910
T89	MycobacteriumtuberculosisH37Rv(chromosome)	Rv0919
T90	MycobacteriumtuberculosisH37Rv(chromosome)	Rv1102c
T91	MycobacteriumtuberculosisH37Rv(chromosome)	Rv1114
T92	MycobacteriumtuberculosisH37Rv(chromosome)	Rv1242
T93	MycobacteriumtuberculosisH37Rv(chromosome)	Rv1246c
T94	MycobacteriumtuberculosisH37Rv(chromosome)	Rv1397c
T95	MycobacteriumtuberculosisH37Rv(chromosome)	Rv1495
T96	MycobacteriumtuberculosisH37Rv(chromosome)	Rv1546
T97	MycobacteriumtuberculosisH37Rv(chromosome)	Rv1561
T98	MycobacteriumtuberculosisH37Rv(chromosome)	Rv1720c
T99	MycobacteriumtuberculosisH37Rv(chromosome)	Rv1741
T100	MycobacteriumtuberculosisH37Rv(chromosome)	Rv1838c
T101	MycobacteriumtuberculosisH37Rv(chromosome)	Rv1942c
T102	MycobacteriumtuberculosisH37Rv(chromosome)	Rv1953
T103	MycobacteriumtuberculosisH37Rv(chromosome)	Rv1955
T105	MycobacteriumtuberculosisH37Rv(chromosome)	Rv1959c
T106	MycobacteriumtuberculosisH37Rv(chromosome)	Rv1989c
T107	MycobacteriumtuberculosisH37Rv(chromosome)	Rv2010
T108	MycobacteriumtuberculosisH37Rv(chromosome)	Rv2019
T109	MycobacteriumtuberculosisH37Rv(chromosome)	Rv2022c
T110	MycobacteriumtuberculosisH37Rv(chromosome)	Rv2035
T111	MycobacteriumtuberculosisH37Rv(chromosome)	Rv2103c
T112	MycobacteriumtuberculosisH37Rv(chromosome)	Rv2494
T113	MycobacteriumtuberculosisH37Rv(chromosome)	Rv2527
T114	MycobacteriumtuberculosisH37Rv(chromosome)	Rv2530c
T115	MycobacteriumtuberculosisH37Rv(chromosome)	Rv2546
T116	MycobacteriumtuberculosisH37Rv(chromosome)	Rv2548
T117	MycobacteriumtuberculosisH37Rv(chromosome)	Rv2549c
T118	MycobacteriumtuberculosisH37Rv(chromosome)	Rv2596
T119	MycobacteriumtuberculosisH37Rv(chromosome)	Rv2602
T120	MycobacteriumtuberculosisH37Rv(chromosome)	Rv2653c
T121	MycobacteriumtuberculosisH37Rv(chromosome)	Rv2757c
T122	MycobacteriumtuberculosisH37Rv(chromosome)	Rv2759c
T123	MycobacteriumtuberculosisH37Rv(chromosome)	Rv2829c
T124	MycobacteriumtuberculosisH37Rv(chromosome)	Rv2866
T125	MycobacteriumtuberculosisH37Rv(chromosome)	Rv2872
T126	MycobacteriumtuberculosisH37Rv(chromosome)	Rv3180c
T127	MycobacteriumtuberculosisH37Rv(chromosome)	Rv3182
T128	MycobacteriumtuberculosisH37Rv(chromosome)	Rv3189
T129	MycobacteriumtuberculosisH37Rv(chromosome)	Rv3320c
T130	MycobacteriumtuberculosisH37Rv(chromosome)	Rv3358
T131	MycobacteriumtuberculosisH37Rv(chromosome)	Rv3384c
T132	MycobacteriumtuberculosisH37Rv(chromosome)	Rv3408
T133	MycobacteriumtuberculosisH37Rv(chromosome)	Rv3749c
T6240	MycobacteriumtuberculosisH37Rv(chromosome)	Rv0059
T6241	MycobacteriumtuberculosisH37Rv(chromosome)	Rv0065
T6242	MycobacteriumtuberculosisH37Rv(chromosome)	Rv0456a
T6243	MycobacteriumtuberculosisH37Rv(chromosome)	Rv0836c
T6244	MycobacteriumtuberculosisH37Rv(chromosome)	Rv0960
T6245	MycobacteriumtuberculosisH37Rv(chromosome)	Rv1962c
T6246	MycobacteriumtuberculosisH37Rv(chromosome)	Rv1982c
T6247	MycobacteriumtuberculosisH37Rv(chromosome)	Rv1991c
T6248	MycobacteriumtuberculosisH37Rv(chromosome)	Rv2063A
T6249	MycobacteriumtuberculosisH37Rv(chromosome)	Rv2142c
T6250	MycobacteriumtuberculosisH37Rv(chromosome)	Rv2231A
T6251	MycobacteriumtuberculosisH37Rv(chromosome)	Rv2274c
T6252	MycobacteriumtuberculosisH37Rv(chromosome)	Rv2801c
T6254	MycobacteriumtuberculosisH37Rv(chromosome)	Rv2863
T6255	MycobacteriumtuberculosisH37Rv(chromosome)	Rv2697c
T134	Bacillussubtilissubsp.subtilisstr.168(chromosome)	BSU04660
T135	Bacillussubtilissubsp.subtilisstr.168(chromosome)	BSU04810
T136	Bacillussubtilissubsp.subtilisstr.168(chromosome)	BSU19060
T6029	Bacillussubtilissubsp.subtilisstr.168(chromosome)	BSU12830
T6030	Bacillussubtilissubsp.subtilisstr.168(chromosome)	BSU39300
T137	DeinococcusradioduransR1(chromosome)	DR_0417
T138	DeinococcusradioduransR1(chromosome)	DR_0419
T139	DeinococcusradioduransR1(chromosome)	DR_0660
T140	DeinococcusradioduransR1(chromosome)	DR_0662
T141	DeinococcusradioduransR1(chromosome)	DR_0679
T142	DeinococcusradioduransR1(chromosome)	DR_1530
T143	DeinococcusradioduransR1(chromosome)	DR_1806
T144	DeinococcusradioduransR1(chromosome)	DR_2102
T1730	MethanocaldococcusjannaschiiDSM2661(plasmidlargeECE)	MJECL30
T1731	Halobacteriumsp.NRC-1(plasmidpNRC100)	VNG7131
T6078	EscherichiacoliO157:H7str.Sakai(plasmidpOSAK1)	pOSAK1_02
T1732	EscherichiacoliO157:H7str.Sakai(plasmidpO157)	pO157p29
T1733	EscherichiacoliO157:H7str.Sakai(plasmidpO157)	pO157p70
T1076	Shigellaflexneri2b(plasmidR100)	R100p114
T6151	EscherichiacoliB171(plasmidpB171)	pB171_043
T6145	EscherichiacoliK-12(plasmidF)	D616_p97105
T145	Xylellafastidiosa9a5c(chromosome)	XF0533
T146	Xylellafastidiosa9a5c(chromosome)	XF0721
T147	Xylellafastidiosa9a5c(chromosome)	XF1562
T148	Xylellafastidiosa9a5c(chromosome)	XF1573
T149	Xylellafastidiosa9a5c(chromosome)	XF1589
T150	Xylellafastidiosa9a5c(chromosome)	XF1589
T151	Xylellafastidiosa9a5c(chromosome)	XF1597
T152	Xylellafastidiosa9a5c(chromosome)	XF1678
T153	Xylellafastidiosa9a5c(chromosome)	XF1703
T154	Xylellafastidiosa9a5c(chromosome)	XF1755
T155	Xylellafastidiosa9a5c(chromosome)	XF1862
T156	Xylellafastidiosa9a5c(chromosome)	XF2029
T157	Xylellafastidiosa9a5c(chromosome)	XF2032
T158	Xylellafastidiosa9a5c(chromosome)	XF2066
T159	Xylellafastidiosa9a5c(chromosome)	XF2070
T160	Xylellafastidiosa9a5c(chromosome)	XF2074
T161	Xylellafastidiosa9a5c(chromosome)	XF2080
T162	Xylellafastidiosa9a5c(chromosome)	XF2490
T163	Xylellafastidiosa9a5c(chromosome)	XF2764
T1734	Xylellafastidiosa9a5c(plasmidpXF51)	XFa0025
T1735	Xylellafastidiosa9a5c(plasmidpXF51)	XFa0034
T1736	Xylellafastidiosa9a5c(plasmidpXF51)	XFa0045
T164	VibriocholeraeO1biovarElTorstr.N16961(chromosome)	VCA0311
T165	VibriocholeraeO1biovarElTorstr.N16961(chromosome)	VCA0318
T166	VibriocholeraeO1biovarElTorstr.N16961(chromosome)	VCA0323
T167	VibriocholeraeO1biovarElTorstr.N16961(chromosome)	VCA0332
T168	VibriocholeraeO1biovarElTorstr.N16961(chromosome)	VCA0348
T169	VibriocholeraeO1biovarElTorstr.N16961(chromosome)	VCA0359
T170	VibriocholeraeO1biovarElTorstr.N16961(chromosome)	VCA0385
T171	VibriocholeraeO1biovarElTorstr.N16961(chromosome)	VCA0391
T172	VibriocholeraeO1biovarElTorstr.N16961(chromosome)	VCA0423
T173	VibriocholeraeO1biovarElTorstr.N16961(chromosome)	VCA0444
T174	VibriocholeraeO1biovarElTorstr.N16961(chromosome)	VCA0468
T175	VibriocholeraeO1biovarElTorstr.N16961(chromosome)	VCA0478
T176	VibriocholeraeO1biovarElTorstr.N16961(chromosome)	VCA0481
T177	VibriocholeraeO1biovarElTorstr.N16961(chromosome)	VCA0487
T178	VibriocholeraeO1biovarElTorstr.N16961(chromosome)	VCA0489
T179	VibriocholeraeO1biovarElTorstr.N16961(chromosome)	VCA0503
T180	PseudomonasaeruginosaPAO1(chromosome)	PA0124
T181	PseudomonasaeruginosaPAO1(chromosome)	PA1030
T182	PseudomonasaeruginosaPAO1(chromosome)	PA1878
T183	PseudomonasaeruginosaPAO1(chromosome)	PA3270
T184	BacillushaloduransC-125(chromosome)	BH0522
T185	BacillushaloduransC-125(chromosome)	BH0695
T186	BacillushaloduransC-125(chromosome)	BH1287
T187	BacillushaloduransC-125(chromosome)	BH2087
T188	BacillushaloduransC-125(chromosome)	BH3550
T189	BacillushaloduransC-125(chromosome)	BH3721
T190	EscherichiacoliO157:H7str.EDL933(chromosome)	Z0057
T191	EscherichiacoliO157:H7str.EDL933(chromosome)	Z0284
T192	EscherichiacoliO157:H7str.EDL933(chromosome)	Z0510
T193	EscherichiacoliO157:H7str.EDL933(chromosome)	Z1060
T194	EscherichiacoliO157:H7str.EDL933(chromosome)	Z3230
T195	EscherichiacoliO157:H7str.EDL933(chromosome)	Z4097
T196	EscherichiacoliO157:H7str.EDL933(chromosome)	Z4436
T197	EscherichiacoliO157:H7str.EDL933(chromosome)	Z4482
T198	EscherichiacoliO157:H7str.EDL933(chromosome)	Z4722
T199	EscherichiacoliO157:H7str.EDL933(chromosome)	Z4777
T200	EscherichiacoliO157:H7str.EDL933(chromosome)	Z4832
T201	EscherichiacoliO157:H7str.EDL933(chromosome)	Z4883
T202	EscherichiacoliO157:H7str.EDL933(chromosome)	Z5150
T203	EscherichiacoliO157:H7str.EDL933(chromosome)	Z5836
T1737	Lactococcuslactissubsp.lactisIl1403(chromosome)	L38253
T1738	Lactococcuslactissubsp.lactisIl1403(chromosome)	L39625
T1739	Lactococcuslactissubsp.lactisIl1403(chromosome)	L52331
T1740	Lactococcuslactissubsp.lactisIl1403(chromosome)	L53979
T1741	Lactococcuslactissubsp.lactisIl1403(chromosome)	L198048
T204	MesorhizobiumlotiMAFF303099(chromosome)	mlr0746
T205	MesorhizobiumlotiMAFF303099(chromosome)	msr1301
T206	MesorhizobiumlotiMAFF303099(chromosome)	mlr1576
T207	MesorhizobiumlotiMAFF303099(chromosome)	mll1670
T208	MesorhizobiumlotiMAFF303099(chromosome)	mll1857
T209	MesorhizobiumlotiMAFF303099(chromosome)	mll2066
T210	MesorhizobiumlotiMAFF303099(chromosome)	msr2149
T211	MesorhizobiumlotiMAFF303099(chromosome)	mlr2174
T212	MesorhizobiumlotiMAFF303099(chromosome)	mll2215
T213	MesorhizobiumlotiMAFF303099(chromosome)	mll2253
T214	MesorhizobiumlotiMAFF303099(chromosome)	msl3420
T215	MesorhizobiumlotiMAFF303099(chromosome)	mll3558
T216	MesorhizobiumlotiMAFF303099(chromosome)	mll3774
T217	MesorhizobiumlotiMAFF303099(chromosome)	mll3899
T218	MesorhizobiumlotiMAFF303099(chromosome)	mll5078
T219	MesorhizobiumlotiMAFF303099(chromosome)	mll5358
T220	MesorhizobiumlotiMAFF303099(chromosome)	mlr5903
T221	MesorhizobiumlotiMAFF303099(chromosome)	mll6134
T222	MesorhizobiumlotiMAFF303099(chromosome)	mll6953
T223	MesorhizobiumlotiMAFF303099(chromosome)	mlr8183
T1742	MesorhizobiumlotiMAFF303099(plasmidpMLa)	mlr9079
T1743	MesorhizobiumlotiMAFF303099(plasmidpMLa)	msr9191
T1744	MesorhizobiumlotiMAFF303099(plasmidpMLa)	msr9263
T1745	MesorhizobiumlotiMAFF303099(plasmidpMLa)	mll9357
T1002	EscherichiacoliO157:H7str.Sakai(chromosome)	ECs0053
T1003	EscherichiacoliO157:H7str.Sakai(chromosome)	ECs0252
T1004	EscherichiacoliO157:H7str.Sakai(chromosome)	ECs0462
T1005	EscherichiacoliO157:H7str.Sakai(chromosome)	ECs5400
T1006	EscherichiacoliO157:H7str.Sakai(chromosome)	ECs1067
T1008	EscherichiacoliO157:H7str.Sakai(chromosome)	ECs2281
T1010	EscherichiacoliO157:H7str.Sakai(chromosome)	ECs2869
T1011	EscherichiacoliO157:H7str.Sakai(chromosome)	ECs3642
T1012	EscherichiacoliO157:H7str.Sakai(chromosome)	ECs3965
T1013	EscherichiacoliO157:H7str.Sakai(chromosome)	ECs4008
T1014	EscherichiacoliO157:H7str.Sakai(chromosome)	ECs4212
T1015	EscherichiacoliO157:H7str.Sakai(chromosome)	ECs4262
T1016	EscherichiacoliO157:H7str.Sakai(chromosome)	ECs4307
T1017	EscherichiacoliO157:H7str.Sakai(chromosome)	ECs4357
T1018	EscherichiacoliO157:H7str.Sakai(chromosome)	ECs4597
T1019	EscherichiacoliO157:H7str.Sakai(chromosome)	ECs5203
T224	CaulobactercrescentusCB15(chromosome)	CC_0031
T225	CaulobactercrescentusCB15(chromosome)	CC_0489
T226	CaulobactercrescentusCB15(chromosome)	CC_0802
T227	CaulobactercrescentusCB15(chromosome)	CC_0841
T228	CaulobactercrescentusCB15(chromosome)	CC_0873
T229	CaulobactercrescentusCB15(chromosome)	CC_2513
T230	CaulobactercrescentusCB15(chromosome)	CC_2735
T231	CaulobactercrescentusCB15(chromosome)	CC_2770
T232	CaulobactercrescentusCB15(chromosome)	CC_2880
T233	CaulobactercrescentusCB15(chromosome)	CC_2984
T234	CaulobactercrescentusCB15(chromosome)	CC_3038
T235	CaulobactercrescentusCB15(chromosome)	CC_3080
T236	CaulobactercrescentusCB15(chromosome)	CC_3184
T6148	CaulobactercrescentusCB15(chromosome)	CC_2756
T6147	Shigellaflexneri5astr.M90T(plasmidvirulenceplasmidpWR501)	pWR501_0259
T745	StreptococcuspyogenesM1GAS(chromosome)	SPy_0552
T746	StreptococcuspyogenesM1GAS(chromosome)	SPy_0938
T747	StreptococcuspyogenesM1GAS(chromosome)	SPy_1927
T748	StreptococcuspyogenesM1GAS(chromosome)	SPy_2128
T6153	StreptococcuspyogenesM1GAS(chromosome)	SPy_1248
T1073	Staphylococcusaureussubsp.aureusN315(chromosome)	SA1873
T1074	Staphylococcusaureussubsp.aureusN315(chromosome)	SA2195
T1075	Staphylococcusaureussubsp.aureusN315(chromosome)	SA2245
T942	SulfolobussolfataricusP2(chromosome)	SSO1160
T943	SulfolobussolfataricusP2(chromosome)	SSO1251
T944	SulfolobussolfataricusP2(chromosome)	SSO1471
T945	SulfolobussolfataricusP2(chromosome)	SSO1493
T946	SulfolobussolfataricusP2(chromosome)	SSO1640
T947	SulfolobussolfataricusP2(chromosome)	SSO1657
T948	SulfolobussolfataricusP2(chromosome)	SSO1673
T949	SulfolobussolfataricusP2(chromosome)	SSO1835
T950	SulfolobussolfataricusP2(chromosome)	SSO1868
T951	SulfolobussolfataricusP2(chromosome)	SSO1968
T952	SulfolobussolfataricusP2(chromosome)	SSO2107
T953	SulfolobussolfataricusP2(chromosome)	SSO2529
T954	SulfolobussolfataricusP2(chromosome)	SSO2781
T955	SulfolobussolfataricusP2(chromosome)	SSO2783
T956	SulfolobussolfataricusP2(chromosome)	SSO3078
T957	SulfolobussolfataricusP2(chromosome)	SSO3128
T237	MycobacteriumtuberculosisCDC1551(chromosome)	MT0254
T238	MycobacteriumtuberculosisCDC1551(chromosome)	MT0289
T239	MycobacteriumtuberculosisCDC1551(chromosome)	MT0574
T240	MycobacteriumtuberculosisCDC1551(chromosome)	MT0625
T241	MycobacteriumtuberculosisCDC1551(chromosome)	MT0628
T242	MycobacteriumtuberculosisCDC1551(chromosome)	MT0638
T243	MycobacteriumtuberculosisCDC1551(chromosome)	MT0646
T244	MycobacteriumtuberculosisCDC1551(chromosome)	MT0652
T245	MycobacteriumtuberculosisCDC1551(chromosome)	MT0685
T246	MycobacteriumtuberculosisCDC1551(chromosome)	MT0688
T247	MycobacteriumtuberculosisCDC1551(chromosome)	MT0690
T248	MycobacteriumtuberculosisCDC1551(chromosome)	MT0693
T249	MycobacteriumtuberculosisCDC1551(chromosome)	MT0773
T250	MycobacteriumtuberculosisCDC1551(chromosome)	MT0945
T251	MycobacteriumtuberculosisCDC1551(chromosome)	MT0988
T252	MycobacteriumtuberculosisCDC1551(chromosome)	MT1134
T253	MycobacteriumtuberculosisCDC1551(chromosome)	MT1144
T254	MycobacteriumtuberculosisCDC1551(chromosome)	MT1280
T255	MycobacteriumtuberculosisCDC1551(chromosome)	MT1441
T256	MycobacteriumtuberculosisCDC1551(chromosome)	MT1542
T257	MycobacteriumtuberculosisCDC1551(chromosome)	MT1612
T258	MycobacteriumtuberculosisCDC1551(chromosome)	MT1761
T259	MycobacteriumtuberculosisCDC1551(chromosome)	MT1783
T260	MycobacteriumtuberculosisCDC1551(chromosome)	MT1886
T261	MycobacteriumtuberculosisCDC1551(chromosome)	MT2003
T262	MycobacteriumtuberculosisCDC1551(chromosome)	MT2004
T263	MycobacteriumtuberculosisCDC1551(chromosome)	MT2008
T264	MycobacteriumtuberculosisCDC1551(chromosome)	MT2012
T265	MycobacteriumtuberculosisCDC1551(chromosome)	MT2034
T266	MycobacteriumtuberculosisCDC1551(chromosome)	MT2043
T267	MycobacteriumtuberculosisCDC1551(chromosome)	MT2046
T268	MycobacteriumtuberculosisCDC1551(chromosome)	MT2065
T269	MycobacteriumtuberculosisCDC1551(chromosome)	MT2075
T270	MycobacteriumtuberculosisCDC1551(chromosome)	MT2078
T271	MycobacteriumtuberculosisCDC1551(chromosome)	MT2095
T272	MycobacteriumtuberculosisCDC1551(chromosome)	MT2123
T273	MycobacteriumtuberculosisCDC1551(chromosome)	MT2163
T274	MycobacteriumtuberculosisCDC1551(chromosome)	MT2200
T275	MycobacteriumtuberculosisCDC1551(chromosome)	MT2569
T276	MycobacteriumtuberculosisCDC1551(chromosome)	MT2602
T277	MycobacteriumtuberculosisCDC1551(chromosome)	MT2605
T278	MycobacteriumtuberculosisCDC1551(chromosome)	MT2622
T279	MycobacteriumtuberculosisCDC1551(chromosome)	MT2624
T280	MycobacteriumtuberculosisCDC1551(chromosome)	MT2677
T281	MycobacteriumtuberculosisCDC1551(chromosome)	MT2722
T282	MycobacteriumtuberculosisCDC1551(chromosome)	MT2827
T283	MycobacteriumtuberculosisCDC1551(chromosome)	MT2829
T284	MycobacteriumtuberculosisCDC1551(chromosome)	MT2932
T285	MycobacteriumtuberculosisCDC1551(chromosome)	MT3271
T286	MycobacteriumtuberculosisCDC1551(chromosome)	MT3274
T287	MycobacteriumtuberculosisCDC1551(chromosome)	MT3277
T288	MycobacteriumtuberculosisCDC1551(chromosome)	MT3421
T289	MycobacteriumtuberculosisCDC1551(chromosome)	MT3466
T290	MycobacteriumtuberculosisCDC1551(chromosome)	MT3492
T291	MycobacteriumtuberculosisCDC1551(chromosome)	MT3516
T292	MycobacteriumtuberculosisCDC1551(chromosome)	MT3799
T293	MycobacteriumtuberculosisCDC1551(chromosome)	MT3856
T294	Staphylococcusaureussubsp.aureusMu50(chromosome)	SAV0850
T295	Staphylococcusaureussubsp.aureusMu50(chromosome)	SAV2068
T296	Staphylococcusaureussubsp.aureusMu50(chromosome)	SAV2407
T297	Staphylococcusaureussubsp.aureusMu50(chromosome)	SAV2456
T1329	BordetellabronchisepticaRB50(chromosome)	BB0527
T1330	BordetellabronchisepticaRB50(chromosome)	BB0935
T1331	BordetellabronchisepticaRB50(chromosome)	BB1411
T1332	BordetellabronchisepticaRB50(chromosome)	BB1689
T1333	BordetellabronchisepticaRB50(chromosome)	BB2141
T1334	BordetellabronchisepticaRB50(chromosome)	BB2401
T1335	BordetellabronchisepticaRB50(chromosome)	BB2471
T1336	BordetellabronchisepticaRB50(chromosome)	BB2720
T1337	BordetellabronchisepticaRB50(chromosome)	BB2743
T1338	BordetellabronchisepticaRB50(chromosome)	BB2897
T1339	BordetellabronchisepticaRB50(chromosome)	BB2964
T1340	BordetellabronchisepticaRB50(chromosome)	BB3160
T1287	Bordetellaparapertussis12822(chromosome)	BPP0380
T1288	Bordetellaparapertussis12822(chromosome)	BPP0524
T1289	Bordetellaparapertussis12822(chromosome)	BPP0645
T1290	Bordetellaparapertussis12822(chromosome)	BPP1335
T1291	Bordetellaparapertussis12822(chromosome)	BPP1402
T1292	Bordetellaparapertussis12822(chromosome)	BPP1954
T1293	Bordetellaparapertussis12822(chromosome)	BPP2078
T1294	Bordetellaparapertussis12822(chromosome)	BPP2743
T1295	Bordetellaparapertussis12822(chromosome)	BPP2765
T1296	Bordetellaparapertussis12822(chromosome)	BPP2839
T1297	Bordetellaparapertussis12822(chromosome)	BPP2927
T1298	Bordetellaparapertussis12822(chromosome)	BPP2998
T1299	Bordetellaparapertussis12822(chromosome)	BPP3141
T1746	BordetellapertussisTohamaI(chromosome)	BP0060
T1747	BordetellapertussisTohamaI(chromosome)	BP1291
T1748	BordetellapertussisTohamaI(chromosome)	BP1522
T1749	BordetellapertussisTohamaI(chromosome)	BP1585
T1750	BordetellapertussisTohamaI(chromosome)	BP2144
T1751	BordetellapertussisTohamaI(chromosome)	BP2622
T1752	BordetellapertussisTohamaI(chromosome)	BP3465
T298	ChlorobiumtepidumTLS(chromosome)	CT0333
T299	ChlorobiumtepidumTLS(chromosome)	CT0460
T300	ChlorobiumtepidumTLS(chromosome)	CT0821
T1672	CorynebacteriumdiphtheriaeNCTC13129(chromosome)	DIP0007
T1673	CorynebacteriumdiphtheriaeNCTC13129(chromosome)	DIP0795
T1753	Dehalococcoidesmccartyi195(chromosome)	DET1516
T1663	Desulfovibriovulgarisstr.Hildenborough(chromosome)	DVU0223
T1664	Desulfovibriovulgarisstr.Hildenborough(chromosome)	DVU1509
T1665	Desulfovibriovulgarisstr.Hildenborough(chromosome)	DVU1729
T1666	Desulfovibriovulgarisstr.Hildenborough(chromosome)	DVU1735
T1667	Desulfovibriovulgarisstr.Hildenborough(chromosome)	DVU2035
T1530	GeobactersulfurreducensPCA(chromosome)	GSU0055
T1531	GeobactersulfurreducensPCA(chromosome)	GSU0736
T1532	GeobactersulfurreducensPCA(chromosome)	GSU1354
T1533	GeobactersulfurreducensPCA(chromosome)	GSU1391
T1534	GeobactersulfurreducensPCA(chromosome)	GSU2399
T1535	GeobactersulfurreducensPCA(chromosome)	GSU2439
T1536	GeobactersulfurreducensPCA(chromosome)	GSU2472
T1280	Haemophilusducreyi35000HP(chromosome)	HD0911
T1674	Legionellapneumophilasubsp.pneumophilastr.Philadelphia1	lpg0488
T1675	Legionellapneumophilasubsp.pneumophilastr.Philadelphia1	lpg1604
T1676	Legionellapneumophilasubsp.pneumophilastr.Philadelphia1	lpg1934
T1677	Legionellapneumophilasubsp.pneumophilastr.Philadelphia1	lpg2369
T1678	Legionellapneumophilasubsp.pneumophilastr.Philadelphia1	lpg2378
T1679	Legionellapneumophilasubsp.pneumophilastr.Philadelphia1	lpg2915
T1680	Legionellapneumophilasubsp.pneumophilastr.Philadelphia1	lpg2921
T1326	Mycobacteriumaviumsubsp.paratuberculosisK-10(chromosome)	MAP1640c
T1327	Mycobacteriumaviumsubsp.paratuberculosisK-10(chromosome)	MAP2027c
T1328	Mycobacteriumaviumsubsp.paratuberculosisK-10(chromosome)	MAP4269c
T1121	MycobacteriumbovisAF2122/97(chromosome)	Mb0246
T1122	MycobacteriumbovisAF2122/97(chromosome)	Mb0307
T1123	MycobacteriumbovisAF2122/97(chromosome)	Mb0309
T1124	MycobacteriumbovisAF2122/97(chromosome)	Mb0564c
T1125	MycobacteriumbovisAF2122/97(chromosome)	Mb0597
T1126	MycobacteriumbovisAF2122/97(chromosome)	Mb0611c
T1127	MycobacteriumbovisAF2122/97(chromosome)	Mb0614c
T1128	MycobacteriumbovisAF2122/97(chromosome)	Mb0625
T1129	MycobacteriumbovisAF2122/97(chromosome)	Mb0640
T1130	MycobacteriumbovisAF2122/97(chromosome)	Mb0643
T1131	MycobacteriumbovisAF2122/97(chromosome)	Mb0675c
T1132	MycobacteriumbovisAF2122/97(chromosome)	Mb0678c
T1133	MycobacteriumbovisAF2122/97(chromosome)	Mb0680c
T1134	MycobacteriumbovisAF2122/97(chromosome)	Mb0684
T1135	MycobacteriumbovisAF2122/97(chromosome)	Mb0770
T1136	MycobacteriumbovisAF2122/97(chromosome)	Mb0943
T1137	MycobacteriumbovisAF2122/97(chromosome)	Mb1132c
T1138	MycobacteriumbovisAF2122/97(chromosome)	Mb1144
T1139	MycobacteriumbovisAF2122/97(chromosome)	Mb1274
T1140	MycobacteriumbovisAF2122/97(chromosome)	Mb1278c
T1141	MycobacteriumbovisAF2122/97(chromosome)	Mb1432c
T1142	MycobacteriumbovisAF2122/97(chromosome)	Mb1532
T1143	MycobacteriumbovisAF2122/97(chromosome)	Mb1587
T1144	MycobacteriumbovisAF2122/97(chromosome)	Mb1749c
T1145	MycobacteriumbovisAF2122/97(chromosome)	Mb1770
T1146	MycobacteriumbovisAF2122/97(chromosome)	Mb1869c
T1147	MycobacteriumbovisAF2122/97(chromosome)	Mb1977c
T1148	MycobacteriumbovisAF2122/97(chromosome)	Mb1988
T1149	MycobacteriumbovisAF2122/97(chromosome)	Mb1990
T1150	MycobacteriumbovisAF2122/97(chromosome)	Mb1994c
T1151	MycobacteriumbovisAF2122/97(chromosome)	Mb2011c
T1152	MycobacteriumbovisAF2122/97(chromosome)	Mb2033
T1153	MycobacteriumbovisAF2122/97(chromosome)	Mb2042
T1154	MycobacteriumbovisAF2122/97(chromosome)	Mb2045c
T1155	MycobacteriumbovisAF2122/97(chromosome)	Mb2061
T1156	MycobacteriumbovisAF2122/97(chromosome)	Mb2129c
T1157	MycobacteriumbovisAF2122/97(chromosome)	Mb2522
T1158	MycobacteriumbovisAF2122/97(chromosome)	Mb2556
T1159	MycobacteriumbovisAF2122/97(chromosome)	Mb2559c
T1160	MycobacteriumbovisAF2122/97(chromosome)	Mb2576
T1161	MycobacteriumbovisAF2122/97(chromosome)	Mb2578
T1162	MycobacteriumbovisAF2122/97(chromosome)	Mb2579c
T1163	MycobacteriumbovisAF2122/97(chromosome)	Mb2627
T1164	MycobacteriumbovisAF2122/97(chromosome)	Mb2634
T1165	MycobacteriumbovisAF2122/97(chromosome)	Mb2778c
T1166	MycobacteriumbovisAF2122/97(chromosome)	Mb2780c
T1167	MycobacteriumbovisAF2122/97(chromosome)	Mb2853c
T1168	MycobacteriumbovisAF2122/97(chromosome)	Mb2891
T1169	MycobacteriumbovisAF2122/97(chromosome)	Mb2897
T1170	MycobacteriumbovisAF2122/97(chromosome)	Mb3206c
T1171	MycobacteriumbovisAF2122/97(chromosome)	Mb3208
T1172	MycobacteriumbovisAF2122/97(chromosome)	Mb3211
T1173	MycobacteriumbovisAF2122/97(chromosome)	Mb3349c
T1174	MycobacteriumbovisAF2122/97(chromosome)	Mb3393
T1175	MycobacteriumbovisAF2122/97(chromosome)	Mb3416c
T1176	MycobacteriumbovisAF2122/97(chromosome)	Mb3442
T1177	MycobacteriumbovisAF2122/97(chromosome)	Mb3775c
T1754	NeisseriagonorrhoeaeFA1090(chromosome)	NGO0516
T1755	NeisseriagonorrhoeaeFA1090(chromosome)	NGO0907
T1756	NeisseriagonorrhoeaeFA1090(chromosome)	NGO1628
T301	PseudomonasputidaKT2440(chromosome)	PP_0275
T302	PseudomonasputidaKT2440(chromosome)	PP_0771
T303	PseudomonasputidaKT2440(chromosome)	PP_1199
T304	PseudomonasputidaKT2440(chromosome)	PP_1267
T305	PseudomonasputidaKT2440(chromosome)	PP_1480
T306	PseudomonasputidaKT2440(chromosome)	PP_1586
T307	PseudomonasputidaKT2440(chromosome)	PP_2434
T309	PseudomonasputidaKT2440(chromosome)	PP_2500
T310	PseudomonasputidaKT2440(chromosome)	PP_2939
T311	PseudomonasputidaKT2440(chromosome)	PP_3032
T312	PseudomonasputidaKT2440(chromosome)	PP_3900
T313	PseudomonasputidaKT2440(chromosome)	PP_4152
T314	PseudomonasputidaKT2440(chromosome)	PP_4205
T315	PseudomonasputidaKT2440(chromosome)	PP_4530
T1757	PorphyromonasgingivalisW83(chromosome)	PG0858
T1758	PorphyromonasgingivalisW83(chromosome)	PG0859
T1276	Staphylococcusaureussubsp.aureusCOL(chromosome)	SACOL0889
T1277	Staphylococcusaureussubsp.aureusCOL(chromosome)	SACOL2058
T1278	Staphylococcusaureussubsp.aureusCOL(chromosome)	SACOL2404
T1279	Staphylococcusaureussubsp.aureusCOL(chromosome)	SACOL2464
T1537	Staphylococcusaureussubsp.aureusMRSA252(chromosome)	SAR1557
T1538	Staphylococcusaureussubsp.aureusMRSA252(chromosome)	SAR2156
T1539	Staphylococcusaureussubsp.aureusMRSA252(chromosome)	SAR2497
T1381	Staphylococcusaureussubsp.aureusMSSA476(chromosome)	SAS0896
T1382	Staphylococcusaureussubsp.aureusMSSA476(chromosome)	SAS1973
T1383	Staphylococcusaureussubsp.aureusMSSA476(chromosome)	SAS2298
T1384	Staphylococcusaureussubsp.aureusMSSA476(chromosome)	SAS2348
T1681	TreponemadenticolaATCC35405(chromosome)	TDE0036
T1682	TreponemadenticolaATCC35405(chromosome)	TDE0197
T1683	TreponemadenticolaATCC35405(chromosome)	TDE0236
T1684	TreponemadenticolaATCC35405(chromosome)	TDE0277
T1685	TreponemadenticolaATCC35405(chromosome)	TDE0280
T1686	TreponemadenticolaATCC35405(chromosome)	TDE0303
T1687	TreponemadenticolaATCC35405(chromosome)	TDE0452
T1688	TreponemadenticolaATCC35405(chromosome)	TDE0465
T1689	TreponemadenticolaATCC35405(chromosome)	TDE0482
T1690	TreponemadenticolaATCC35405(chromosome)	TDE0495
T1691	TreponemadenticolaATCC35405(chromosome)	TDE0505
T1692	TreponemadenticolaATCC35405(chromosome)	TDE0599
T1693	TreponemadenticolaATCC35405(chromosome)	TDE0662
T1694	TreponemadenticolaATCC35405(chromosome)	TDE0698
T1695	TreponemadenticolaATCC35405(chromosome)	TDE0735
T1696	TreponemadenticolaATCC35405(chromosome)	TDE0737
T1697	TreponemadenticolaATCC35405(chromosome)	TDE0887
T1698	TreponemadenticolaATCC35405(chromosome)	TDE0989
T1699	TreponemadenticolaATCC35405(chromosome)	TDE1116
T1700	TreponemadenticolaATCC35405(chromosome)	TDE1635
T1701	TreponemadenticolaATCC35405(chromosome)	TDE1648
T1702	TreponemadenticolaATCC35405(chromosome)	TDE1788
T1703	TreponemadenticolaATCC35405(chromosome)	TDE1801
T1704	TreponemadenticolaATCC35405(chromosome)	TDE1807
T1705	TreponemadenticolaATCC35405(chromosome)	TDE1838
T1706	TreponemadenticolaATCC35405(chromosome)	TDE1841
T1707	TreponemadenticolaATCC35405(chromosome)	TDE1961
T1708	TreponemadenticolaATCC35405(chromosome)	TDE1978
T1709	TreponemadenticolaATCC35405(chromosome)	TDE2106
T1710	TreponemadenticolaATCC35405(chromosome)	TDE2127
T1711	TreponemadenticolaATCC35405(chromosome)	TDE2213
T1712	TreponemadenticolaATCC35405(chromosome)	TDE2247
T1713	TreponemadenticolaATCC35405(chromosome)	TDE2252
T1714	TreponemadenticolaATCC35405(chromosome)	TDE2532
T1715	TreponemadenticolaATCC35405(chromosome)	TDE2564
T1716	TreponemadenticolaATCC35405(chromosome)	TDE2577
T1717	TreponemadenticolaATCC35405(chromosome)	TDE2757
T316	CoxiellaburnetiiRSA493(chromosome)	CBU_0284
T317	CoxiellaburnetiiRSA493(chromosome)	CBU_0644
T318	CoxiellaburnetiiRSA493(chromosome)	CBU_1022
T319	CoxiellaburnetiiRSA493(chromosome)	CBU_1294
T320	CoxiellaburnetiiRSA493(chromosome)	CBU_1692
T321	CoxiellaburnetiiRSA493(chromosome)	CBU_1992
T322	CoxiellaburnetiiRSA493(chromosome)	CBU_2084
T1759	Listeriamonocytogenesserotype4bstr.F2365(chromosome)	LMOf2365_0131
T1341	StaphylococcusepidermidisRP62A(chromosome)	SERP1549
T1342	StaphylococcusepidermidisRP62A(chromosome)	SERP1681
T1718	Methylococcuscapsulatusstr.Bath(chromosome)	MCA0270
T1719	Methylococcuscapsulatusstr.Bath(chromosome)	MCA1623
T1720	Methylococcuscapsulatusstr.Bath(chromosome)	MCA2638
T1721	Methylococcuscapsulatusstr.Bath(chromosome)	MCA2653
T1722	Methylococcuscapsulatusstr.Bath(chromosome)	MCA3007
T1493	WolbachiaendosymbiontofDrosophilamelanogaster(chromosome)	WD0122
T1494	WolbachiaendosymbiontofDrosophilamelanogaster(chromosome)	WD0124
T1495	WolbachiaendosymbiontofDrosophilamelanogaster(chromosome)	WD0126
T1496	WolbachiaendosymbiontofDrosophilamelanogaster(chromosome)	WD0269
T1497	WolbachiaendosymbiontofDrosophilamelanogaster(chromosome)	WD0404
T1498	WolbachiaendosymbiontofDrosophilamelanogaster(chromosome)	WD0600
T323	StreptococcuspneumoniaeTIGR4(chromosome)	SP_0276
T324	StreptococcuspneumoniaeTIGR4(chromosome)	SP_0889
T325	StreptococcuspneumoniaeTIGR4(chromosome)	SP_1143
T326	StreptococcuspneumoniaeTIGR4(chromosome)	SP_1223
T327	StreptococcuspneumoniaeTIGR4(chromosome)	SP_1740
T328	StreptococcuspneumoniaeTIGR4(chromosome)	SP_1787
T329	StreptococcuspneumoniaeTIGR4(chromosome)	SP_1935
T330	ClostridiumacetobutylicumATCC824(chromosome)	CA_C0494
T331	ClostridiumacetobutylicumATCC824(chromosome)	CA_C0548
T332	ClostridiumacetobutylicumATCC824(chromosome)	CA_C1945
T6097	Sinorhizobiummeliloti1021(plasmidpSymA)	SMa0473
T863	Sinorhizobiummeliloti1021(chromosome)	SMc00352
T864	Sinorhizobiummeliloti1021(chromosome)	SMc00393
T865	Sinorhizobiummeliloti1021(chromosome)	SMc04431
T866	Sinorhizobiummeliloti1021(chromosome)	SMc00822
T867	Sinorhizobiummeliloti1021(chromosome)	SMc00900
T868	Sinorhizobiummeliloti1021(chromosome)	SMc02461
T869	Sinorhizobiummeliloti1021(chromosome)	SMc02657
T870	Sinorhizobiummeliloti1021(chromosome)	SMc01932
T871	Sinorhizobiummeliloti1021(chromosome)	SMc01177
T872	Sinorhizobiummeliloti1021(chromosome)	SMc04221
T873	Sinorhizobiummeliloti1021(chromosome)	SMc04313
T874	Sinorhizobiummeliloti1021(chromosome)	SMc04161
T875	Sinorhizobiummeliloti1021(chromosome)	SMc04441
T876	Sinorhizobiummeliloti1021(chromosome)	SMc02715
T877	Sinorhizobiummeliloti1021(chromosome)	SMc01521
T878	Sinorhizobiummeliloti1021(chromosome)	SMc01995
T879	Sinorhizobiummeliloti1021(chromosome)	SMc00739
T880	Sinorhizobiummeliloti1021(chromosome)	SMc00694
T881	Sinorhizobiummeliloti1021(chromosome)	SMc00687
T882	Sinorhizobiummeliloti1021(chromosome)	SMc02987
T883	Sinorhizobiummeliloti1021(chromosome)	SMc03137
T884	Sinorhizobiummeliloti1021(chromosome)	SMc02476
T885	Sinorhizobiummeliloti1021(chromosome)	SMc03842
T886	Sinorhizobiummeliloti1021(chromosome)	SMc04881
T333	Agrobacteriumtumefaciensstr.C58(chromosome)	Atu0246
T334	Agrobacteriumtumefaciensstr.C58(chromosome)	Atu0674
T335	Agrobacteriumtumefaciensstr.C58(chromosome)	Atu0809
T336	Agrobacteriumtumefaciensstr.C58(chromosome)	Atu0849
T337	Agrobacteriumtumefaciensstr.C58(chromosome)	Atu0934
T338	Agrobacteriumtumefaciensstr.C58(chromosome)	Atu0940
T339	Agrobacteriumtumefaciensstr.C58(chromosome)	Atu1004
T340	Agrobacteriumtumefaciensstr.C58(chromosome)	Atu1078
T341	Agrobacteriumtumefaciensstr.C58(chromosome)	Atu1311
T342	Agrobacteriumtumefaciensstr.C58(chromosome)	Atu1510
T343	Agrobacteriumtumefaciensstr.C58(chromosome)	Atu1628
T344	Agrobacteriumtumefaciensstr.C58(chromosome)	Atu1782
T345	Agrobacteriumtumefaciensstr.C58(chromosome)	Atu2017
T346	Agrobacteriumtumefaciensstr.C58(chromosome)	Atu8169
T347	Agrobacteriumtumefaciensstr.C58(chromosome)	Atu2033
T348	Agrobacteriumtumefaciensstr.C58(chromosome)	Atu2140
T349	Agrobacteriumtumefaciensstr.C58(chromosome)	Atu2326
T6098	Sinorhizobiummeliloti1021(plasmidpSymB)	SM_b21127
T726	StreptococcuspneumoniaeR6(chromosome)	spr0253
T727	StreptococcuspneumoniaeR6(chromosome)	spr1103
T728	StreptococcuspneumoniaeR6(chromosome)	spr1585
T729	StreptococcuspneumoniaeR6(chromosome)	spr1613
T730	StreptococcuspneumoniaeR6(chromosome)	spr1752
T6282	StreptococcuspneumoniaeR6(chromosome)	spr0952
T350	Rickettsiaconoriistr.Malish7(chromosome)	RC0006
T351	Rickettsiaconoriistr.Malish7(chromosome)	RC0291
T352	Rickettsiaconoriistr.Malish7(chromosome)	RC0379
T353	Rickettsiaconoriistr.Malish7(chromosome)	RC0476
T354	Rickettsiaconoriistr.Malish7(chromosome)	RC0510
T355	Rickettsiaconoriistr.Malish7(chromosome)	RC0600
T356	Rickettsiaconoriistr.Malish7(chromosome)	RC0677
T357	Rickettsiaconoriistr.Malish7(chromosome)	RC0824
T358	Rickettsiaconoriistr.Malish7(chromosome)	RC0927
T359	Rickettsiaconoriistr.Malish7(chromosome)	RC1014
T360	Rickettsiaconoriistr.Malish7(chromosome)	RC1072
T361	Rickettsiaconoriistr.Malish7(chromosome)	RC1143
T362	Rickettsiaconoriistr.Malish7(chromosome)	RC1172
T363	Rickettsiaconoriistr.Malish7(chromosome)	RC1222
T364	Rickettsiaconoriistr.Malish7(chromosome)	RC1248
T365	Rickettsiaconoriistr.Malish7(chromosome)	RC1318
T366	Sulfolobustokodaiistr.7(chromosome)	ST0017
T367	Sulfolobustokodaiistr.7(chromosome)	ST0036
T368	Sulfolobustokodaiistr.7(chromosome)	STS014
T369	Sulfolobustokodaiistr.7(chromosome)	STS036
T370	Sulfolobustokodaiistr.7(chromosome)	ST0337
T371	Sulfolobustokodaiistr.7(chromosome)	ST0662
T372	Sulfolobustokodaiistr.7(chromosome)	STS083
T373	Sulfolobustokodaiistr.7(chromosome)	ST0690
T374	Sulfolobustokodaiistr.7(chromosome)	ST0741
T375	Sulfolobustokodaiistr.7(chromosome)	ST0751
T376	Sulfolobustokodaiistr.7(chromosome)	ST0785
T377	Sulfolobustokodaiistr.7(chromosome)	ST0790
T378	Sulfolobustokodaiistr.7(chromosome)	ST0793
T379	Sulfolobustokodaiistr.7(chromosome)	ST0799
T380	Sulfolobustokodaiistr.7(chromosome)	ST0839
T381	Sulfolobustokodaiistr.7(chromosome)	ST0897
T382	Sulfolobustokodaiistr.7(chromosome)	ST0906
T383	Sulfolobustokodaiistr.7(chromosome)	STS118
T384	Sulfolobustokodaiistr.7(chromosome)	ST1086
T385	Sulfolobustokodaiistr.7(chromosome)	ST1101
T386	Sulfolobustokodaiistr.7(chromosome)	ST1125
T387	Sulfolobustokodaiistr.7(chromosome)	ST1142
T388	Sulfolobustokodaiistr.7(chromosome)	STS143
T389	Sulfolobustokodaiistr.7(chromosome)	ST1572
T390	Sulfolobustokodaiistr.7(chromosome)	ST1573
T391	Sulfolobustokodaiistr.7(chromosome)	ST1593
T392	Sulfolobustokodaiistr.7(chromosome)	ST1628
T393	Sulfolobustokodaiistr.7(chromosome)	ST1639
T394	Sulfolobustokodaiistr.7(chromosome)	ST1642
T395	Sulfolobustokodaiistr.7(chromosome)	ST1687
T396	Sulfolobustokodaiistr.7(chromosome)	ST1713
T397	Sulfolobustokodaiistr.7(chromosome)	ST1758
T398	Sulfolobustokodaiistr.7(chromosome)	ST1932
T399	Sulfolobustokodaiistr.7(chromosome)	ST1943
T400	Sulfolobustokodaiistr.7(chromosome)	ST2012
T401	Sulfolobustokodaiistr.7(chromosome)	ST2191
T402	Sulfolobustokodaiistr.7(chromosome)	ST2228
T403	NeisseriameningitidisMC58(chromosome)	NMB0913
T404	NeisseriameningitidisMC58(chromosome)	NMB1118
T405	NeisseriameningitidisMC58(chromosome)	NMB1265
T406	NeisseriameningitidisMC58(chromosome)	NMB1665
T407	NeisseriameningitidisMC58(chromosome)	NMB1890
T408	NeisseriameningitidisMC58(chromosome)	NMB2038
T1760	YersiniapestisCO92(plasmidpPCP1)	YPPCP1.09c
T1761	YersiniapestisCO92(plasmidpMT1)	YPMT1.69
T409	StreptomycesavermitilisMA-4680=NBRC14893(chromosome)	SAV_219
T410	StreptomycesavermitilisMA-4680=NBRC14893(chromosome)	SAV_829
T411	StreptomycesavermitilisMA-4680=NBRC14893(chromosome)	SAV_1047
T412	StreptomycesavermitilisMA-4680=NBRC14893(chromosome)	SAV_1743
T413	StreptomycesavermitilisMA-4680=NBRC14893(chromosome)	SAV_2176
T414	StreptomycesavermitilisMA-4680=NBRC14893(chromosome)	SAV_2799
T415	StreptomycesavermitilisMA-4680=NBRC14893(chromosome)	SAV_3142
T416	StreptomycesavermitilisMA-4680=NBRC14893(chromosome)	SAV_3205
T417	StreptomycesavermitilisMA-4680=NBRC14893(chromosome)	SAV_3426
T418	StreptomycesavermitilisMA-4680=NBRC14893(chromosome)	SAV_3615
T419	StreptomycesavermitilisMA-4680=NBRC14893(chromosome)	SAV_3784
T420	StreptomycesavermitilisMA-4680=NBRC14893(chromosome)	SAV_4049
T421	StreptomycesavermitilisMA-4680=NBRC14893(chromosome)	SAV_4088
T422	StreptomycesavermitilisMA-4680=NBRC14893(chromosome)	SAV_4431
T423	StreptomycesavermitilisMA-4680=NBRC14893(chromosome)	SAV_4472
T424	StreptomycesavermitilisMA-4680=NBRC14893(chromosome)	SAV_4977
T425	StreptomycesavermitilisMA-4680=NBRC14893(chromosome)	SAV_5012
T426	StreptomycesavermitilisMA-4680=NBRC14893(chromosome)	SAV_5199
T427	StreptomycesavermitilisMA-4680=NBRC14893(chromosome)	SAV_5294
T428	StreptomycesavermitilisMA-4680=NBRC14893(chromosome)	SAV_5407
T429	StreptomycesavermitilisMA-4680=NBRC14893(chromosome)	SAV_5625
T430	StreptomycesavermitilisMA-4680=NBRC14893(chromosome)	SAV_5694
T431	StreptomycesavermitilisMA-4680=NBRC14893(chromosome)	SAV_5753
T432	StreptomycesavermitilisMA-4680=NBRC14893(chromosome)	SAV_5966
T433	StreptomycesavermitilisMA-4680=NBRC14893(chromosome)	SAV_6254
T434	StreptomycesavermitilisMA-4680=NBRC14893(chromosome)	SAV_7087
T435	StreptomycesavermitilisMA-4680=NBRC14893(chromosome)	SAV_7095
T436	Salmonellaentericasubsp.entericaserovarTyphimuriumstr.LT2	STM1550
T437	Salmonellaentericasubsp.entericaserovarTyphimuriumstr.LT2	STM2905
T438	Salmonellaentericasubsp.entericaserovarTyphimuriumstr.LT2	STM2954.1n
T439	Salmonellaentericasubsp.entericaserovarTyphimuriumstr.LT2	STM3033
T440	Salmonellaentericasubsp.entericaserovarTyphimuriumstr.LT2	STM3470
T441	Salmonellaentericasubsp.entericaserovarTyphimuriumstr.LT2	STM3516
T442	Salmonellaentericasubsp.entericaserovarTyphimuriumstr.LT2	STM3558
T443	Salmonellaentericasubsp.entericaserovarTyphimuriumstr.LT2	STM3651
T444	Salmonellaentericasubsp.entericaserovarTyphimuriumstr.LT2	STM3777
T445	Salmonellaentericasubsp.entericaserovarTyphimuriumstr.LT2	STM3906
T446	Salmonellaentericasubsp.entericaserovarTyphimuriumstr.LT2	STM4031
T447	Salmonellaentericasubsp.entericaserovarTyphimuriumstr.LT2	STM4032.2N
T448	Salmonellaentericasubsp.entericaserovarTyphimuriumstr.LT2	STM4318
T449	Salmonellaentericasubsp.entericaserovarTyphimuriumstr.LT2	STM4450
T450	Salmonellaentericasubsp.entericaserovarTyphimuriumstr.LT2	STM4528
T6086	Salmonellaentericasubsp.entericaserovarTyphimuriumstr.LT2	STM4528
T6087	Salmonellaentericasubsp.entericaserovarTyphimuriumstr.LT2	STM4031
T6088	Salmonellaentericasubsp.entericaserovarTyphimuriumstr.LT2	STM4032.2N
T823	Salmonellaentericasubsp.entericaserovarTyphistr.CT18	STY1031
T824	Salmonellaentericasubsp.entericaserovarTyphistr.CT18	STY3027
T825	Salmonellaentericasubsp.entericaserovarTyphistr.CT18	STY3182
T826	Salmonellaentericasubsp.entericaserovarTyphistr.CT18	STY3651
T827	Salmonellaentericasubsp.entericaserovarTyphistr.CT18	STY3844
T828	Salmonellaentericasubsp.entericaserovarTyphistr.CT18	STY3847
T829	Salmonellaentericasubsp.entericaserovarTyphistr.CT18	STY4151
T830	Salmonellaentericasubsp.entericaserovarTyphistr.CT18	STY4326
T831	Salmonellaentericasubsp.entericaserovarTyphistr.CT18	STY4518
T832	Salmonellaentericasubsp.entericaserovarTyphistr.CT18	STY4668
T833	Salmonellaentericasubsp.entericaserovarTyphistr.CT18	STY4789
T834	Salmonellaentericasubsp.entericaserovarTyphistr.CT18	STY4886
T743	ListeriamonocytogenesEGD-e(chromosome)	lmo0113
T744	ListeriamonocytogenesEGD-e(chromosome)	lmo0888
T788	ListeriainnocuaClip11262(chromosome)	lin0160
T789	ListeriainnocuaClip11262(chromosome)	lin0887
T790	ListeriainnocuaClip11262(chromosome)	lin1233
T791	ListeriainnocuaClip11262(chromosome)	lin1763
T792	ListeriainnocuaClip11262(chromosome)	lin2608
T1762	BacteroidesfragilisNCTC9343(chromosome)	BF0344
T1763	BacteroidesfragilisNCTC9343(chromosome)	BF0724
T1764	BacteroidesfragilisNCTC9343(chromosome)	BF1074
T1765	BacteroidesfragilisNCTC9343(chromosome)	BF3476
T1766	Nostocsp.PCC7120(Anabaenasp.PCC7120)(plasmidpCC7120beta)	all7686
T1767	Nostocsp.PCC7120(Anabaenasp.PCC7120)(plasmidpCC7120epsilon)	alr9029
T451	Nostocsp.PCC7120(Anabaenasp.PCC7120)(chromosome)	alr0149
T452	Nostocsp.PCC7120(Anabaenasp.PCC7120)(chromosome)	asl0171
T453	Nostocsp.PCC7120(Anabaenasp.PCC7120)(chromosome)	all0337
T454	Nostocsp.PCC7120(Anabaenasp.PCC7120)(chromosome)	alr0502
T455	Nostocsp.PCC7120(Anabaenasp.PCC7120)(chromosome)	alr0504
T456	Nostocsp.PCC7120(Anabaenasp.PCC7120)(chromosome)	all0604
T457	Nostocsp.PCC7120(Anabaenasp.PCC7120)(chromosome)	alr0683
T458	Nostocsp.PCC7120(Anabaenasp.PCC7120)(chromosome)	all0753
T459	Nostocsp.PCC7120(Anabaenasp.PCC7120)(chromosome)	alr0758
T460	Nostocsp.PCC7120(Anabaenasp.PCC7120)(chromosome)	all1034
T461	Nostocsp.PCC7120(Anabaenasp.PCC7120)(chromosome)	all1495
T462	Nostocsp.PCC7120(Anabaenasp.PCC7120)(chromosome)	alr1560
T463	Nostocsp.PCC7120(Anabaenasp.PCC7120)(chromosome)	asl1720
T464	Nostocsp.PCC7120(Anabaenasp.PCC7120)(chromosome)	asl1824
T466	Nostocsp.PCC7120(Anabaenasp.PCC7120)(chromosome)	alr1977
T467	Nostocsp.PCC7120(Anabaenasp.PCC7120)(chromosome)	asl2100
T468	Nostocsp.PCC7120(Anabaenasp.PCC7120)(chromosome)	alr2173
T469	Nostocsp.PCC7120(Anabaenasp.PCC7120)(chromosome)	asl2181
T470	Nostocsp.PCC7120(Anabaenasp.PCC7120)(chromosome)	all2196
T471	Nostocsp.PCC7120(Anabaenasp.PCC7120)(chromosome)	all2402
T472	Nostocsp.PCC7120(Anabaenasp.PCC7120)(chromosome)	all2421
T473	Nostocsp.PCC7120(Anabaenasp.PCC7120)(chromosome)	all2685
T474	Nostocsp.PCC7120(Anabaenasp.PCC7120)(chromosome)	asl2714
T475	Nostocsp.PCC7120(Anabaenasp.PCC7120)(chromosome)	all2804
T476	Nostocsp.PCC7120(Anabaenasp.PCC7120)(chromosome)	all2924
T477	Nostocsp.PCC7120(Anabaenasp.PCC7120)(chromosome)	asr2959
T478	Nostocsp.PCC7120(Anabaenasp.PCC7120)(chromosome)	asr3006
T479	Nostocsp.PCC7120(Anabaenasp.PCC7120)(chromosome)	asl3128
T480	Nostocsp.PCC7120(Anabaenasp.PCC7120)(chromosome)	all3211
T481	Nostocsp.PCC7120(Anabaenasp.PCC7120)(chromosome)	alr3469
T482	Nostocsp.PCC7120(Anabaenasp.PCC7120)(chromosome)	alr3479
T483	Nostocsp.PCC7120(Anabaenasp.PCC7120)(chromosome)	alr3622
T484	Nostocsp.PCC7120(Anabaenasp.PCC7120)(chromosome)	asr3961
T485	Nostocsp.PCC7120(Anabaenasp.PCC7120)(chromosome)	all3972
T486	Nostocsp.PCC7120(Anabaenasp.PCC7120)(chromosome)	alr4134
T487	Nostocsp.PCC7120(Anabaenasp.PCC7120)(chromosome)	all4135
T488	Nostocsp.PCC7120(Anabaenasp.PCC7120)(chromosome)	asl4138
T489	Nostocsp.PCC7120(Anabaenasp.PCC7120)(chromosome)	asl4362
T490	Nostocsp.PCC7120(Anabaenasp.PCC7120)(chromosome)	all4407
T491	Nostocsp.PCC7120(Anabaenasp.PCC7120)(chromosome)	asr4471
T492	Nostocsp.PCC7120(Anabaenasp.PCC7120)(chromosome)	asl4561
T493	Nostocsp.PCC7120(Anabaenasp.PCC7120)(chromosome)	alr4601
T494	Nostocsp.PCC7120(Anabaenasp.PCC7120)(chromosome)	asl4856
T495	Nostocsp.PCC7120(Anabaenasp.PCC7120)(chromosome)	alr4921
T496	Nostocsp.PCC7120(Anabaenasp.PCC7120)(chromosome)	alr4952
T497	Nostocsp.PCC7120(Anabaenasp.PCC7120)(chromosome)	all5132
T498	Nostocsp.PCC7120(Anabaenasp.PCC7120)(chromosome)	all5132
T499	Nostocsp.PCC7120(Anabaenasp.PCC7120)(chromosome)	alr5181
T500	Nostocsp.PCC7120(Anabaenasp.PCC7120)(chromosome)	asl5277
T1768	Nostocsp.PCC7120(Anabaenasp.PCC7120)(plasmidpCC7120alpha)	all7155
T501	RalstoniasolanacearumGMI1000(chromosome)	RSc0124
T502	RalstoniasolanacearumGMI1000(chromosome)	RSc0263
T503	RalstoniasolanacearumGMI1000(chromosome)	RSc0871
T504	RalstoniasolanacearumGMI1000(chromosome)	RSc0992
T505	RalstoniasolanacearumGMI1000(chromosome)	RSc1446
T506	RalstoniasolanacearumGMI1000(chromosome)	RSc1959
T507	RalstoniasolanacearumGMI1000(chromosome)	RSc3055
T508	RalstoniasolanacearumGMI1000(chromosome)	RSc3133
T509	RalstoniasolanacearumGMI1000(chromosome)	RSc3224
T510	RalstoniasolanacearumGMI1000(chromosome)	RSc3279
T511	Brucellamelitensisbv.1str.16M(chromosome)	BMEI1376
T512	Brucellamelitensisbv.1str.16M(chromosome)	BMEI1526
T513	Pyrobaculumaerophilumstr.IM2(chromosome)	PAE0033
T514	Pyrobaculumaerophilumstr.IM2(chromosome)	PAE0045
T515	Pyrobaculumaerophilumstr.IM2(chromosome)	PAE0101
T516	Pyrobaculumaerophilumstr.IM2(chromosome)	PAE0151
T517	Pyrobaculumaerophilumstr.IM2(chromosome)	PAE0166
T518	Pyrobaculumaerophilumstr.IM2(chromosome)	PAE0167
T519	Pyrobaculumaerophilumstr.IM2(chromosome)	PAE0337
T520	Pyrobaculumaerophilumstr.IM2(chromosome)	PAE0391a
T521	Pyrobaculumaerophilumstr.IM2(chromosome)	PAE0401
T522	Pyrobaculumaerophilumstr.IM2(chromosome)	PAE0498
T523	Pyrobaculumaerophilumstr.IM2(chromosome)	PAE0905
T524	Pyrobaculumaerophilumstr.IM2(chromosome)	PAE1153
T525	Pyrobaculumaerophilumstr.IM2(chromosome)	PAE1311
T526	Pyrobaculumaerophilumstr.IM2(chromosome)	PAE1320
T527	Pyrobaculumaerophilumstr.IM2(chromosome)	PAE1870
T528	Pyrobaculumaerophilumstr.IM2(chromosome)	PAE1891
T529	Pyrobaculumaerophilumstr.IM2(chromosome)	PAE1893
T530	Pyrobaculumaerophilumstr.IM2(chromosome)	PAE1903
T531	Pyrobaculumaerophilumstr.IM2(chromosome)	PAE1951
T532	Pyrobaculumaerophilumstr.IM2(chromosome)	PAE2034
T533	Pyrobaculumaerophilumstr.IM2(chromosome)	PAE2551
T534	Pyrobaculumaerophilumstr.IM2(chromosome)	PAE2676
T535	Pyrobaculumaerophilumstr.IM2(chromosome)	PAE2754
T536	Pyrobaculumaerophilumstr.IM2(chromosome)	PAE2760
T537	Pyrobaculumaerophilumstr.IM2(chromosome)	PAE2784
T538	Pyrobaculumaerophilumstr.IM2(chromosome)	PAE2829
T539	Pyrobaculumaerophilumstr.IM2(chromosome)	PAE2851
T540	Clostridiumperfringensstr.13(chromosome)	CPE0295
T541	Clostridiumperfringensstr.13(chromosome)	CPE0814
T542	PyrococcusfuriosusDSM3638(chromosome)	PF0355
T543	PyrococcusfuriosusDSM3638(chromosome)	PF0574
T544	PyrococcusfuriosusDSM3638(chromosome)	PF0575
T545	PyrococcusfuriosusDSM3638(chromosome)	PF0773
T546	PyrococcusfuriosusDSM3638(chromosome)	PF0776
T547	PyrococcusfuriosusDSM3638(chromosome)	PF0778
T548	PyrococcusfuriosusDSM3638(chromosome)	PF0812
T549	PyrococcusfuriosusDSM3638(chromosome)	PF0839
T550	PyrococcusfuriosusDSM3638(chromosome)	PF0944
T551	PyrococcusfuriosusDSM3638(chromosome)	PF1206
T552	PyrococcusfuriosusDSM3638(chromosome)	PF1223
T554	PyrococcusfuriosusDSM3638(chromosome)	PF1323
T555	PyrococcusfuriosusDSM3638(chromosome)	PF1352
T556	PyrococcusfuriosusDSM3638(chromosome)	PF2057
T557	CorynebacteriumglutamicumATCC13032(chromosome)	NCgl0010
T558	CorynebacteriumglutamicumATCC13032(chromosome)	NCgl1186
T793	Fusobacteriumnucleatumsubsp.nucleatumATCC25586(chromosome)	FN1664
T794	Fusobacteriumnucleatumsubsp.nucleatumATCC25586(chromosome)	FN1998
T795	Fusobacteriumnucleatumsubsp.nucleatumATCC25586(chromosome)	FN2066
T796	Fusobacteriumnucleatumsubsp.nucleatumATCC25586(chromosome)	FN0211
T797	Fusobacteriumnucleatumsubsp.nucleatumATCC25586(chromosome)	FN0497
T798	Fusobacteriumnucleatumsubsp.nucleatumATCC25586(chromosome)	FN1100
T994	StreptococcuspyogenesMGAS8232(chromosome)	spyM18_0339
T995	StreptococcuspyogenesMGAS8232(chromosome)	spyM18_0344
T996	StreptococcuspyogenesMGAS8232(chromosome)	spyM18_0617
T997	StreptococcuspyogenesMGAS8232(chromosome)	spyM18_0723
T998	StreptococcuspyogenesMGAS8232(chromosome)	spyM18_0747
T999	StreptococcuspyogenesMGAS8232(chromosome)	spyM18_1307
T1000	StreptococcuspyogenesMGAS8232(chromosome)	spyM18_1802
T1001	StreptococcuspyogenesMGAS8232(chromosome)	spyM18_1995
T799	MethanosarcinaacetivoransC2A(chromosome)	MA0049
T800	MethanosarcinaacetivoransC2A(chromosome)	MA0100
T801	MethanosarcinaacetivoransC2A(chromosome)	MA0173
T802	MethanosarcinaacetivoransC2A(chromosome)	MA0376
T803	MethanosarcinaacetivoransC2A(chromosome)	MA0480
T805	MethanosarcinaacetivoransC2A(chromosome)	MA0765
T806	MethanosarcinaacetivoransC2A(chromosome)	MA0766
T807	MethanosarcinaacetivoransC2A(chromosome)	MA1295
T808	MethanosarcinaacetivoransC2A(chromosome)	MA1515
T809	MethanosarcinaacetivoransC2A(chromosome)	MA1694
T810	MethanosarcinaacetivoransC2A(chromosome)	MA1853
T811	MethanosarcinaacetivoransC2A(chromosome)	MA2131
T812	MethanosarcinaacetivoransC2A(chromosome)	MA2135
T813	MethanosarcinaacetivoransC2A(chromosome)	MA2160
T814	MethanosarcinaacetivoransC2A(chromosome)	MA2376
T815	MethanosarcinaacetivoransC2A(chromosome)	MA2618
T816	MethanosarcinaacetivoransC2A(chromosome)	MA2815
T817	MethanosarcinaacetivoransC2A(chromosome)	MA3426
T818	MethanosarcinaacetivoransC2A(chromosome)	MA3500
T820	MethanosarcinaacetivoransC2A(chromosome)	MA4126
T821	MethanosarcinaacetivoransC2A(chromosome)	MA4280
T822	MethanosarcinaacetivoransC2A(chromosome)	MA4418
T761	ThermoanaerobactertengcongensisMB4(Caldanaerobactersubterraneus)(chromosome)	TTE0452
T762	ThermoanaerobactertengcongensisMB4(Caldanaerobactersubterraneus)(chromosome)	TTE0710
T763	ThermoanaerobactertengcongensisMB4(Caldanaerobactersubterraneus)(chromosome)	TTE0712
T764	ThermoanaerobactertengcongensisMB4(Caldanaerobactersubterraneus)(chromosome)	TTE0751
T765	ThermoanaerobactertengcongensisMB4(Caldanaerobactersubterraneus)(chromosome)	TTE0859
T766	ThermoanaerobactertengcongensisMB4(Caldanaerobactersubterraneus)(chromosome)	TTE1060
T767	ThermoanaerobactertengcongensisMB4(Caldanaerobactersubterraneus)(chromosome)	TTE1957
T768	ThermoanaerobactertengcongensisMB4(Caldanaerobactersubterraneus)(chromosome)	TTE1988
T769	ThermoanaerobactertengcongensisMB4(Caldanaerobactersubterraneus)(chromosome)	TTE2029
T770	ThermoanaerobactertengcongensisMB4(Caldanaerobactersubterraneus)(chromosome)	TTE2037
T771	ThermoanaerobactertengcongensisMB4(Caldanaerobactersubterraneus)(chromosome)	TTE2126
T772	ThermoanaerobactertengcongensisMB4(Caldanaerobactersubterraneus)(chromosome)	TTE2166
T773	ThermoanaerobactertengcongensisMB4(Caldanaerobactersubterraneus)(chromosome)	TTE2584
T774	ThermoanaerobactertengcongensisMB4(Caldanaerobactersubterraneus)(chromosome)	TTE2607
T775	ThermoanaerobactertengcongensisMB4(Caldanaerobactersubterraneus)(chromosome)	TTE2611
T559	StreptomycescoelicolorA3(2)(chromosome)	SCO0412
T560	StreptomycescoelicolorA3(2)(chromosome)	SCO1248
T561	StreptomycescoelicolorA3(2)(chromosome)	SCO1978
T563	StreptomycescoelicolorA3(2)(chromosome)	SCO2245
T564	StreptomycescoelicolorA3(2)(chromosome)	SCO2252
T565	StreptomycescoelicolorA3(2)(chromosome)	SCO2382
T566	StreptomycescoelicolorA3(2)(chromosome)	SCO2514
T567	StreptomycescoelicolorA3(2)(chromosome)	SCO4058
T568	StreptomycescoelicolorA3(2)(chromosome)	SCO4177
T569	StreptomycescoelicolorA3(2)(chromosome)	SCO4300
T570	StreptomycescoelicolorA3(2)(chromosome)	SCO4442
T571	StreptomycescoelicolorA3(2)(chromosome)	SCO4542
T572	StreptomycescoelicolorA3(2)(chromosome)	SCO4679
T573	StreptomycescoelicolorA3(2)(chromosome)	SCO5124
T574	StreptomycescoelicolorA3(2)(chromosome)	SCO5759
T575	StreptomycescoelicolorA3(2)(chromosome)	SCO5909
T576	StreptomycescoelicolorA3(2)(chromosome)	SCO6128
T577	StreptomycescoelicolorA3(2)(chromosome)	SCO6235
T578	StreptomycescoelicolorA3(2)(chromosome)	SCO6630
T579	StreptomycescoelicolorA3(2)(chromosome)	SCO6803
T580	StreptomycescoelicolorA3(2)(chromosome)	SCO7616
T6122	StreptomycescoelicolorA3(2)(chromosome)	SCO2236
T582	MethanosarcinamazeiGo1(chromosome)	MM_0023
T584	MethanosarcinamazeiGo1(chromosome)	MM_0032
T585	MethanosarcinamazeiGo1(chromosome)	MM_0160
T587	MethanosarcinamazeiGo1(chromosome)	MM_0187
T588	MethanosarcinamazeiGo1(chromosome)	MM_0207
T589	MethanosarcinamazeiGo1(chromosome)	MM_0549
T590	MethanosarcinamazeiGo1(chromosome)	MM_1160
T591	MethanosarcinamazeiGo1(chromosome)	MM_1163
T592	MethanosarcinamazeiGo1(chromosome)	MM_1472
T593	MethanosarcinamazeiGo1(chromosome)	MM_1664
T594	MethanosarcinamazeiGo1(chromosome)	MM_1867
T596	MethanosarcinamazeiGo1(chromosome)	MM_1924
T597	MethanosarcinamazeiGo1(chromosome)	MM_2472
T598	MethanosarcinamazeiGo1(chromosome)	MM_2549
T599	MethanosarcinamazeiGo1(chromosome)	MM_2600
T600	MethanosarcinamazeiGo1(chromosome)	MM_2605
T601	MethanosarcinamazeiGo1(chromosome)	MM_2608
T602	MethanosarcinamazeiGo1(chromosome)	MM_2658
T603	MethanosarcinamazeiGo1(chromosome)	MM_2680
T604	Xanthomonascampestrispv.campestrisstr.ATCC33913(chromosome)	XCC0249
T605	Xanthomonascampestrispv.campestrisstr.ATCC33913(chromosome)	XCC0714
T606	Xanthomonascampestrispv.campestrisstr.ATCC33913(chromosome)	XCC1035
T607	Xanthomonascampestrispv.campestrisstr.ATCC33913(chromosome)	XCC1066
T608	Xanthomonascampestrispv.campestrisstr.ATCC33913(chromosome)	XCC1632
T609	Xanthomonascampestrispv.campestrisstr.ATCC33913(chromosome)	XCC1862
T610	Xanthomonascampestrispv.campestrisstr.ATCC33913(chromosome)	XCC3105
T6146	Proteusvulgaris(plasmidRts1)	ST585_p263
T1348	BacilluscereusATCC10987(chromosome)	BCE_0274
T1349	BacilluscereusATCC10987(chromosome)	BCE_4623
T1350	BacilluscereusATCC10987(chromosome)	BCE_4853
T1769	Colwelliapsychrerythraea34H(chromosome)	CPS_2664
T1770	RuegeriapomeroyiDSS-3(chromosome)	SPO3351
T1511	CampylobacterjejuniRM1221(chromosome)	CJE0568
T1512	CampylobacterjejuniRM1221(chromosome)	CJE1100
T1513	CampylobacterjejuniRM1221(chromosome)	CJE1103
T731	Xanthomonasaxonopodispv.citristr.306(chromosome)	XAC0081
T732	Xanthomonasaxonopodispv.citristr.306(chromosome)	XAC0187
T733	Xanthomonasaxonopodispv.citristr.306(chromosome)	XAC0268
T734	Xanthomonasaxonopodispv.citristr.306(chromosome)	XAC0768
T735	Xanthomonasaxonopodispv.citristr.306(chromosome)	XAC1141
T736	Xanthomonasaxonopodispv.citristr.306(chromosome)	XAC1194
T737	Xanthomonasaxonopodispv.citristr.306(chromosome)	XAC1494
T738	Xanthomonasaxonopodispv.citristr.306(chromosome)	XAC1501
T739	Xanthomonasaxonopodispv.citristr.306(chromosome)	XAC1884
T740	Xanthomonasaxonopodispv.citristr.306(chromosome)	XAC2187
T741	Xanthomonasaxonopodispv.citristr.306(chromosome)	XAC2428
T742	Xanthomonasaxonopodispv.citristr.306(chromosome)	XAC4315
T611	Staphylococcusaureussubsp.aureusMW2(chromosome)	MW1437
T612	Staphylococcusaureussubsp.aureusMW2(chromosome)	MW1992
T613	Staphylococcusaureussubsp.aureusMW2(chromosome)	MW2329
T614	Staphylococcusaureussubsp.aureusMW2(chromosome)	MW2380
T615	Bacillusanthracisstr.Ames(chromosome)	BA_0254
T616	Bacillusanthracisstr.Ames(chromosome)	BA_3827
T617	Bacillusanthracisstr.Ames(chromosome)	BA_3830
T618	Bacillusanthracisstr.Ames(chromosome)	BA_4963
T1771	RhizobiumetliCFN42(plasmidsymbioticplasmidp42d)	RHE_PD00080
T1772	RhizobiumetliCFN42(plasmidsymbioticplasmidp42d)	RHE_PD00154
T619	StreptococcuspyogenesMGAS315(chromosome)	SpyM3_0394
T620	StreptococcuspyogenesMGAS315(chromosome)	SpyM3_0683
T621	StreptococcuspyogenesMGAS315(chromosome)	SpyM3_0687
T622	StreptococcuspyogenesMGAS315(chromosome)	SpyM3_1264
T623	StreptococcuspyogenesMGAS315(chromosome)	SpyM3_1351
T624	StreptococcuspyogenesMGAS315(chromosome)	SpyM3_1456
T625	StreptococcuspyogenesMGAS315(chromosome)	SpyM3_1662
T626	YersiniapestisKIM10+(chromosome)	y0241
T627	YersiniapestisKIM10+(chromosome)	y0698
T628	YersiniapestisKIM10+(chromosome)	y1986
T629	YersiniapestisKIM10+(chromosome)	y2428
T630	YersiniapestisKIM10+(chromosome)	y2489
T1773	ThermosynechococcuselongatusBP-1(chromosome)	tsl2232
T631	Streptococcusagalactiae2603V/R(chromosome)	SAG0228
T632	Streptococcusagalactiae2603V/R(chromosome)	SAG0436
T633	Streptococcusagalactiae2603V/R(chromosome)	SAG0555
T634	Streptococcusagalactiae2603V/R(chromosome)	SAG1836
T635	Streptococcusagalactiae2603V/R(chromosome)	SAG1883
T636	Streptococcusagalactiae2603V/R(chromosome)	SAG2008
T637	Streptococcusagalactiae2603V/R(chromosome)	SAG2119
T1774	PseudomonasprotegensPf-5(chromosome)	PFL_0169
T1775	PseudomonasprotegensPf-5(chromosome)	PFL_0653
T1776	PseudomonasprotegensPf-5(chromosome)	PFL_0749
T1777	PseudomonasprotegensPf-5(chromosome)	PFL_1053
T1779	PseudomonasprotegensPf-5(chromosome)	PFL_2689
T1780	PseudomonasprotegensPf-5(chromosome)	PFL_3910
T1781	PseudomonasprotegensPf-5(chromosome)	PFL_4044
T1782	PseudomonasprotegensPf-5(chromosome)	PFL_5187
T1783	PseudomonasprotegensPf-5(chromosome)	PFL_5368
T1784	PseudomonasprotegensPf-5(chromosome)	PFL_5748
T1785	PseudomonasprotegensPf-5(chromosome)	PFL_6113
T1786	PseudomonasprotegensPf-5(chromosome)	PFL_6156
T638	OceanobacillusiheyensisHTE831(chromosome)	OB0153
T639	OceanobacillusiheyensisHTE831(chromosome)	OB0206
T640	OceanobacillusiheyensisHTE831(chromosome)	OB0623
T641	BifidobacteriumlongumNCC2705(chromosome)	BL1399
T642	BifidobacteriumlongumNCC2705(chromosome)	BL1759
T643	Brucellasuis1330(chromosome)	BR0407
T644	Brucellasuis1330(chromosome)	BR0557
T645	Brucellasuis1330(chromosome)	BR0975
T646	Shigellaflexneri2astr.301(chromosome)	SF0367
T647	Shigellaflexneri2astr.301(chromosome)	SF1548
T648	Shigellaflexneri2astr.301(chromosome)	SF2076
T649	Shigellaflexneri2astr.301(chromosome)	SF3123
T650	Shigellaflexneri2astr.301(chromosome)	SF3380
T651	Shigellaflexneri2astr.301(chromosome)	SF3434
T652	LeptospirainterrogansserovarLaistr.56601(chromosome)	LA_1001
T653	LeptospirainterrogansserovarLaistr.56601(chromosome)	LA_1781
T654	LeptospirainterrogansserovarLaistr.56601(chromosome)	LA_1799
T655	LeptospirainterrogansserovarLaistr.56601(chromosome)	LA_2843
T656	LeptospirainterrogansserovarLaistr.56601(chromosome)	LA_3274
T657	ShewanellaoneidensisMR-1(chromosome)	SO_0636
T658	ShewanellaoneidensisMR-1(chromosome)	SO_0706
T659	ShewanellaoneidensisMR-1(chromosome)	SO_1444
T660	ShewanellaoneidensisMR-1(chromosome)	SO_3165
T661	ShewanellaoneidensisMR-1(chromosome)	SO_3170
T662	ShewanellaoneidensisMR-1(chromosome)	SO_4641
T1787	ShewanellaoneidensisMR-1(plasmidmegaplasmid)	SO_A0022
T1788	ShewanellaoneidensisMR-1(plasmidmegaplasmid)	SO_A0060
T1789	ShewanellaoneidensisMR-1(plasmidmegaplasmid)	SO_A0069
T1790	ShewanellaoneidensisMR-1(plasmidmegaplasmid)	SO_A0072
T1791	ShewanellaoneidensisMR-1(plasmidmegaplasmid)	SO_A0079
T1792	ShewanellaoneidensisMR-1(plasmidmegaplasmid)	SO_A0088
T1793	ShewanellaoneidensisMR-1(plasmidmegaplasmid)	SO_A0152
T663	StreptococcusmutansUA159(chromosome)	SMU_173
T664	StreptococcusmutansUA159(chromosome)	SMU_219
T665	StreptococcusmutansUA159(chromosome)	SMU_896
T666	StreptococcusmutansUA159(chromosome)	SMU_1767c
T887	StreptococcusagalactiaeNEM316(chromosome)	gbs0221
T888	StreptococcusagalactiaeNEM316(chromosome)	gbs0472
T889	StreptococcusagalactiaeNEM316(chromosome)	gbs0474
T667	CorynebacteriumefficiensYS-314(chromosome)	CE0013
T668	CorynebacteriumefficiensYS-314(chromosome)	CE0817
T669	CorynebacteriumefficiensYS-314(chromosome)	CE1256
T670	CorynebacteriumefficiensYS-314(chromosome)	CE2747
T671	EscherichiacoliCFT073(chromosome)	c0060
T672	EscherichiacoliCFT073(chromosome)	c1910
T673	EscherichiacoliCFT073(chromosome)	c1940
T674	EscherichiacoliCFT073(chromosome)	c2544
T675	EscherichiacoliCFT073(chromosome)	c3274
T676	EscherichiacoliCFT073(chromosome)	c3841
T677	EscherichiacoliCFT073(chromosome)	c3885
T678	EscherichiacoliCFT073(chromosome)	c4136
T679	EscherichiacoliCFT073(chromosome)	c4178
T680	EscherichiacoliCFT073(chromosome)	c4837
T681	EscherichiacoliCFT073(chromosome)	c5296
T682	EscherichiacoliCFT073(chromosome)	c5476
T683	EscherichiacoliCFT073(chromosome)	c5476
T6130	ErwiniapyrifoliaeEp1/96(plasmidpEP36)	pEP36_013
T684	VibriovulnificusCMCP6(chromosome)	VV1_0110
T685	VibriovulnificusCMCP6(chromosome)	VV1_0401
T686	VibriovulnificusCMCP6(chromosome)	VV1_2047
T687	VibriovulnificusCMCP6(chromosome)	VV1_2190
T688	VibriovulnificusCMCP6(chromosome)	VV1_2410
T689	VibriovulnificusCMCP6(chromosome)	VV1_2433
T690	VibriovulnificusCMCP6(chromosome)	VV1_2525
T691	VibriovulnificusCMCP6(chromosome)	VV1_2537
T692	VibriovulnificusCMCP6(chromosome)	VV1_2547
T993	StaphylococcusepidermidisATCC12228(chromosome)	SE1672
T835	BradyrhizobiumdiazoefficiensUSDA110(chromosome)	bll0069
T836	BradyrhizobiumdiazoefficiensUSDA110(chromosome)	blr0610
T837	BradyrhizobiumdiazoefficiensUSDA110(chromosome)	blr0847
T838	BradyrhizobiumdiazoefficiensUSDA110(chromosome)	blr1116
T839	BradyrhizobiumdiazoefficiensUSDA110(chromosome)	bll1668
T840	BradyrhizobiumdiazoefficiensUSDA110(chromosome)	bll1687
T841	BradyrhizobiumdiazoefficiensUSDA110(chromosome)	bll1985
T842	BradyrhizobiumdiazoefficiensUSDA110(chromosome)	blr2113
T843	BradyrhizobiumdiazoefficiensUSDA110(chromosome)	bll2434
T844	BradyrhizobiumdiazoefficiensUSDA110(chromosome)	bsl3012
T845	BradyrhizobiumdiazoefficiensUSDA110(chromosome)	blr4003
T846	BradyrhizobiumdiazoefficiensUSDA110(chromosome)	bll5290
T847	BradyrhizobiumdiazoefficiensUSDA110(chromosome)	blr5653
T848	BradyrhizobiumdiazoefficiensUSDA110(chromosome)	blr6751
T849	BradyrhizobiumdiazoefficiensUSDA110(chromosome)	blr7360
T1097	PectobacteriumatrosepticumSCRI1043(chromosome)	ECA0063
T1098	PectobacteriumatrosepticumSCRI1043(chromosome)	ECA0127
T1099	PectobacteriumatrosepticumSCRI1043(chromosome)	ECA0253
T1100	PectobacteriumatrosepticumSCRI1043(chromosome)	ECA0326
T1101	PectobacteriumatrosepticumSCRI1043(chromosome)	ECA0366
T1102	PectobacteriumatrosepticumSCRI1043(chromosome)	ECA0409
T1103	PectobacteriumatrosepticumSCRI1043(chromosome)	ECA0443
T1104	PectobacteriumatrosepticumSCRI1043(chromosome)	ECA0582
T1105	PectobacteriumatrosepticumSCRI1043(chromosome)	ECA0674
T1106	PectobacteriumatrosepticumSCRI1043(chromosome)	ECA0959
T1107	PectobacteriumatrosepticumSCRI1043(chromosome)	ECA1466
T1108	PectobacteriumatrosepticumSCRI1043(chromosome)	ECA1676
T1109	PectobacteriumatrosepticumSCRI1043(chromosome)	ECA2241
T1110	PectobacteriumatrosepticumSCRI1043(chromosome)	ECA2514
T1111	PectobacteriumatrosepticumSCRI1043(chromosome)	ECA2758
T1112	PectobacteriumatrosepticumSCRI1043(chromosome)	ECA2803
T1113	PectobacteriumatrosepticumSCRI1043(chromosome)	ECA2850
T1114	PectobacteriumatrosepticumSCRI1043(chromosome)	ECA3686
T1115	PectobacteriumatrosepticumSCRI1043(chromosome)	ECA4153
T776	XylellafastidiosaTemecula1(chromosome)	PD0368
T777	XylellafastidiosaTemecula1(chromosome)	PD0370
T778	XylellafastidiosaTemecula1(chromosome)	PD0960
T779	XylellafastidiosaTemecula1(chromosome)	PD0967
T780	XylellafastidiosaTemecula1(chromosome)	PD0982
T781	XylellafastidiosaTemecula1(chromosome)	PD0998
T782	XylellafastidiosaTemecula1(chromosome)	PD1100
T783	XylellafastidiosaTemecula1(chromosome)	PD1176
T784	XylellafastidiosaTemecula1(chromosome)	PD1184
T785	XylellafastidiosaTemecula1(chromosome)	PD1340
T786	XylellafastidiosaTemecula1(chromosome)	PD1343
T787	XylellafastidiosaTemecula1(chromosome)	PD1716
T693	ClostridiumtetaniE88(chromosome)	CTC01069
T694	ClostridiumtetaniE88(chromosome)	CTC01415
T695	ClostridiumtetaniE88(chromosome)	CTC01859
T696	LactobacillusplantarumWCFS1(chromosome)	lp_0430
T697	LactobacillusplantarumWCFS1(chromosome)	lp_0630
T698	LactobacillusplantarumWCFS1(chromosome)	lp_2449
T699	LactobacillusplantarumWCFS1(chromosome)	lp_2882
T700	LactobacillusplantarumWCFS1(chromosome)	lp_3390
T701	LactobacillusplantarumWCFS1(chromosome)	lp_3477
T1050	Pseudomonassyringaepv.tomatostr.DC3000(chromosome)	PSPTO_0213
T1051	Pseudomonassyringaepv.tomatostr.DC3000(chromosome)	PSPTO_0241
T1052	Pseudomonassyringaepv.tomatostr.DC3000(chromosome)	PSPTO_0336
T1053	Pseudomonassyringaepv.tomatostr.DC3000(chromosome)	PSPTO_0423
T1054	Pseudomonassyringaepv.tomatostr.DC3000(chromosome)	PSPTO_0522
T1055	Pseudomonassyringaepv.tomatostr.DC3000(chromosome)	PSPTO_0719
T1056	Pseudomonassyringaepv.tomatostr.DC3000(chromosome)	PSPTO_0931
T1057	Pseudomonassyringaepv.tomatostr.DC3000(chromosome)	PSPTO_1037
T1058	Pseudomonassyringaepv.tomatostr.DC3000(chromosome)	PSPTO_1045
T1059	Pseudomonassyringaepv.tomatostr.DC3000(chromosome)	PSPTO_1057
T1060	Pseudomonassyringaepv.tomatostr.DC3000(chromosome)	PSPTO_1634
T1061	Pseudomonassyringaepv.tomatostr.DC3000(chromosome)	PSPTO_1999
T1062	Pseudomonassyringaepv.tomatostr.DC3000(chromosome)	PSPTO_3677
T1063	Pseudomonassyringaepv.tomatostr.DC3000(chromosome)	PSPTO_5374
T1064	Pseudomonassyringaepv.tomatostr.DC3000(chromosome)	PSPTO_5387
T702	VibrioparahaemolyticusRIMD2210633(chromosome)	VP0402
T703	VibrioparahaemolyticusRIMD2210633(chromosome)	VP1820
T704	VibrioparahaemolyticusRIMD2210633(chromosome)	VP1830
T705	VibrioparahaemolyticusRIMD2210633(chromosome)	VP1843
T706	VibrioparahaemolyticusRIMD2210633(chromosome)	VP1884
T707	VibrioparahaemolyticusRIMD2210633(chromosome)	VP1885
T6102	VibrioparahaemolyticusRIMD2210633(chromosome)	VP1843
T708	StreptococcuspyogenesSSI-1(chromosome)	SPs0410
T709	StreptococcuspyogenesSSI-1(chromosome)	SPs0513
T710	StreptococcuspyogenesSSI-1(chromosome)	SPs0599
T711	StreptococcuspyogenesSSI-1(chromosome)	SPs1163
T712	StreptococcuspyogenesSSI-1(chromosome)	SPs1169
T713	StreptococcuspyogenesSSI-1(chromosome)	SPs1460
T714	StreptococcuspyogenesSSI-1(chromosome)	SPs1660
T749	Salmonellaentericasubsp.entericaserovarTyphistr.Ty2	t1909
T750	Salmonellaentericasubsp.entericaserovarTyphistr.Ty2	t2805
T751	Salmonellaentericasubsp.entericaserovarTyphistr.Ty2	t2943
T752	Salmonellaentericasubsp.entericaserovarTyphistr.Ty2	t3392
T753	Salmonellaentericasubsp.entericaserovarTyphistr.Ty2	t3587
T754	Salmonellaentericasubsp.entericaserovarTyphistr.Ty2	t3590
T755	Salmonellaentericasubsp.entericaserovarTyphistr.Ty2	t3868
T756	Salmonellaentericasubsp.entericaserovarTyphistr.Ty2	t4035
T757	Salmonellaentericasubsp.entericaserovarTyphistr.Ty2	t4224
T758	Salmonellaentericasubsp.entericaserovarTyphistr.Ty2	t4359
T759	Salmonellaentericasubsp.entericaserovarTyphistr.Ty2	t4484
T760	Salmonellaentericasubsp.entericaserovarTyphistr.Ty2	t4578
T1794	Pseudomonassyringaepv.tomatostr.DC3000(plasmidpDC3000B)	PSPTO_B0018
T1795	Pseudomonassyringaepv.tomatostr.DC3000(plasmidpDC3000B)	PSPTO_B0025
T1796	Pseudomonassyringaepv.tomatostr.DC3000(plasmidpDC3000B)	PSPTO_B0073
T1797	Pseudomonassyringaepv.tomatostr.DC3000(plasmidpDC3000A)	PSPTOA0057
T715	BacteroidesthetaiotaomicronVPI-5482(chromosome)	BT_0168
T716	BacteroidesthetaiotaomicronVPI-5482(chromosome)	BT_2209
T717	BacteroidesthetaiotaomicronVPI-5482(chromosome)	BT_4530
T718	BacteroidesthetaiotaomicronVPI-5482(chromosome)	BT_4732
T1020	EnterococcusfaecalisV583(chromosome)	EF0128
T1021	EnterococcusfaecalisV583(chromosome)	EF0137
T1022	EnterococcusfaecalisV583(chromosome)	EF0305
T1023	EnterococcusfaecalisV583(chromosome)	EF0379
T1024	EnterococcusfaecalisV583(chromosome)	EF0513
T1025	EnterococcusfaecalisV583(chromosome)	EF1276
T1026	EnterococcusfaecalisV583(chromosome)	EF1421
T1027	EnterococcusfaecalisV583(chromosome)	EF2041
T1028	EnterococcusfaecalisV583(chromosome)	EF2143
T1029	EnterococcusfaecalisV583(chromosome)	EF2535
T1030	EnterococcusfaecalisV583(chromosome)	EF2545
T1031	EnterococcusfaecalisV583(chromosome)	EF2853
T1032	EnterococcusfaecalisV583(chromosome)	EF3262
T1798	EnterococcusfaecalisV583(plasmidpTEF1)	EFA0066
T1799	EnterococcusfaecalisV583(plasmidpTEF1)	EFA0071
T1800	CoxiellaburnetiiRSA493(plasmidpQpH1)	CBUA0028
T719	BacilluscereusATCC14579(chromosome)	BC0266
T720	BacilluscereusATCC14579(chromosome)	BC3702
T721	BacilluscereusATCC14579(chromosome)	BC4709
T6297	BacilluscereusATCC14579(chromosome)	BC2436
T1729	Acidithiobacilluscaldus(plasmidpTC-F14)	pTC-F14_p08
T722	Shigellaflexneri2astr.2457T(chromosome)	S4812
T723	Shigellaflexneri2astr.2457T(chromosome)	S1669
T724	Shigellaflexneri2astr.2457T(chromosome)	S3330
T725	Shigellaflexneri2astr.2457T(chromosome)	S4383
T890	NitrosomonaseuropaeaATCC19718(chromosome)	NE0261
T891	NitrosomonaseuropaeaATCC19718(chromosome)	NE0264
T892	NitrosomonaseuropaeaATCC19718(chromosome)	NE0292
T893	NitrosomonaseuropaeaATCC19718(chromosome)	NE0292
T894	NitrosomonaseuropaeaATCC19718(chromosome)	NE0476
T895	NitrosomonaseuropaeaATCC19718(chromosome)	NE0479
T896	NitrosomonaseuropaeaATCC19718(chromosome)	NE0482
T897	NitrosomonaseuropaeaATCC19718(chromosome)	NE0491
T898	NitrosomonaseuropaeaATCC19718(chromosome)	NE0498
T899	NitrosomonaseuropaeaATCC19718(chromosome)	NE0552
T900	NitrosomonaseuropaeaATCC19718(chromosome)	NE0702
T901	NitrosomonaseuropaeaATCC19718(chromosome)	NE0713
T902	NitrosomonaseuropaeaATCC19718(chromosome)	NE0821
T903	NitrosomonaseuropaeaATCC19718(chromosome)	NE0974
T904	NitrosomonaseuropaeaATCC19718(chromosome)	NE1064
T905	NitrosomonaseuropaeaATCC19718(chromosome)	NE1067
T906	NitrosomonaseuropaeaATCC19718(chromosome)	NE1075
T907	NitrosomonaseuropaeaATCC19718(chromosome)	NE1076
T908	NitrosomonaseuropaeaATCC19718(chromosome)	NE1090
T909	NitrosomonaseuropaeaATCC19718(chromosome)	NE1103
T910	NitrosomonaseuropaeaATCC19718(chromosome)	NE1109
T911	NitrosomonaseuropaeaATCC19718(chromosome)	NE1181
T912	NitrosomonaseuropaeaATCC19718(chromosome)	NE1225
T913	NitrosomonaseuropaeaATCC19718(chromosome)	NE1305
T914	NitrosomonaseuropaeaATCC19718(chromosome)	NE1306
T915	NitrosomonaseuropaeaATCC19718(chromosome)	NE1310
T916	NitrosomonaseuropaeaATCC19718(chromosome)	NE1345
T917	NitrosomonaseuropaeaATCC19718(chromosome)	NE1349
T919	NitrosomonaseuropaeaATCC19718(chromosome)	NE1356
T920	NitrosomonaseuropaeaATCC19718(chromosome)	NE1371
T921	NitrosomonaseuropaeaATCC19718(chromosome)	NE1373
T922	NitrosomonaseuropaeaATCC19718(chromosome)	NE1377
T923	NitrosomonaseuropaeaATCC19718(chromosome)	NE1525
T924	NitrosomonaseuropaeaATCC19718(chromosome)	NE1535
T925	NitrosomonaseuropaeaATCC19718(chromosome)	NE1563
T926	NitrosomonaseuropaeaATCC19718(chromosome)	NE1577
T927	NitrosomonaseuropaeaATCC19718(chromosome)	NE1579
T928	NitrosomonaseuropaeaATCC19718(chromosome)	NE1581
T929	NitrosomonaseuropaeaATCC19718(chromosome)	NE1584
T930	NitrosomonaseuropaeaATCC19718(chromosome)	NE1588
T931	NitrosomonaseuropaeaATCC19718(chromosome)	NE1589
T932	NitrosomonaseuropaeaATCC19718(chromosome)	NE1591
T933	NitrosomonaseuropaeaATCC19718(chromosome)	NE1599
T934	NitrosomonaseuropaeaATCC19718(chromosome)	NE1999
T935	NitrosomonaseuropaeaATCC19718(chromosome)	NE2104
T936	NitrosomonaseuropaeaATCC19718(chromosome)	NE2107
T937	NitrosomonaseuropaeaATCC19718(chromosome)	NE2112
T938	NitrosomonaseuropaeaATCC19718(chromosome)	NE2114
T939	NitrosomonaseuropaeaATCC19718(chromosome)	NE2174
T940	NitrosomonaseuropaeaATCC19718(chromosome)	NE2224
T941	NitrosomonaseuropaeaATCC19718(chromosome)	NE2538
T1801	YersiniapestisKIM10+(plasmidpMT-1)	Y1074
T1347	HelicobacterhepaticusATCC51449(chromosome)	HH0272
T1802	Aeromonassalmonicidasubsp.salmonicidaA449(plasmidpAsa1)	ASA_pAsa102
T6022	Enterococcusfaecium(plasmidpRUM)	pRUM_p06
T1033	RhodopirellulabalticaSH1(chromosome)	RB3257
T1034	RhodopirellulabalticaSH1(chromosome)	RB4029
T1035	RhodopirellulabalticaSH1(chromosome)	RB4643
T1036	RhodopirellulabalticaSH1(chromosome)	RB10182
T1037	RhodopirellulabalticaSH1(chromosome)	RB11363
T1263	Synechococcussp.WH8102(chromosome)	SYNW0071
T1264	Synechococcussp.WH8102(chromosome)	SYNW0214
T1265	Synechococcussp.WH8102(chromosome)	SYNW0466
T1266	Synechococcussp.WH8102(chromosome)	SYNW0468
T1267	Synechococcussp.WH8102(chromosome)	SYNW0470
T1268	Synechococcussp.WH8102(chromosome)	SYNW0474
T1269	Synechococcussp.WH8102(chromosome)	SYNW0481
T1270	Synechococcussp.WH8102(chromosome)	SYNW0569
T1271	Synechococcussp.WH8102(chromosome)	SYNW0573
T1272	Synechococcussp.WH8102(chromosome)	SYNW0575
T1273	Synechococcussp.WH8102(chromosome)	SYNW0580
T1274	Synechococcussp.WH8102(chromosome)	SYNW2381
T1803	ChromobacteriumviolaceumATCC12472(chromosome)	CV_0036
T1408	GloeobacterviolaceusPCC7421(chromosome)	glr0096
T1409	GloeobacterviolaceusPCC7421(chromosome)	glr0126
T1410	GloeobacterviolaceusPCC7421(chromosome)	gsl0167
T1411	GloeobacterviolaceusPCC7421(chromosome)	glr0248
T1412	GloeobacterviolaceusPCC7421(chromosome)	glr0279
T1413	GloeobacterviolaceusPCC7421(chromosome)	glr0357
T1414	GloeobacterviolaceusPCC7421(chromosome)	glr0616
T1415	GloeobacterviolaceusPCC7421(chromosome)	glr0631
T1416	GloeobacterviolaceusPCC7421(chromosome)	gll0632
T1417	GloeobacterviolaceusPCC7421(chromosome)	gll0721
T1418	GloeobacterviolaceusPCC7421(chromosome)	gll0844
T1419	GloeobacterviolaceusPCC7421(chromosome)	glr0977
T1420	GloeobacterviolaceusPCC7421(chromosome)	gll1112
T1421	GloeobacterviolaceusPCC7421(chromosome)	glr1124
T1422	GloeobacterviolaceusPCC7421(chromosome)	glr1164
T1423	GloeobacterviolaceusPCC7421(chromosome)	gll1199
T1424	GloeobacterviolaceusPCC7421(chromosome)	gll1212
T1425	GloeobacterviolaceusPCC7421(chromosome)	gll1332
T1426	GloeobacterviolaceusPCC7421(chromosome)	glr1424
T1427	GloeobacterviolaceusPCC7421(chromosome)	gll1436
T1428	GloeobacterviolaceusPCC7421(chromosome)	gll1573
T1429	GloeobacterviolaceusPCC7421(chromosome)	gsl1627
T1430	GloeobacterviolaceusPCC7421(chromosome)	glr1678
T1431	GloeobacterviolaceusPCC7421(chromosome)	gll1679
T1432	GloeobacterviolaceusPCC7421(chromosome)	glr1691
T1433	GloeobacterviolaceusPCC7421(chromosome)	gll1696
T1434	GloeobacterviolaceusPCC7421(chromosome)	gll1708
T1435	GloeobacterviolaceusPCC7421(chromosome)	glr1723
T1436	GloeobacterviolaceusPCC7421(chromosome)	gsl1824
T1437	GloeobacterviolaceusPCC7421(chromosome)	gll1910
T1438	GloeobacterviolaceusPCC7421(chromosome)	gll2024
T1439	GloeobacterviolaceusPCC7421(chromosome)	gsr2077
T1440	GloeobacterviolaceusPCC7421(chromosome)	gll2160
T1441	GloeobacterviolaceusPCC7421(chromosome)	glr2288
T1442	GloeobacterviolaceusPCC7421(chromosome)	gll2293
T1443	GloeobacterviolaceusPCC7421(chromosome)	gll2300
T1444	GloeobacterviolaceusPCC7421(chromosome)	glr2382
T1445	GloeobacterviolaceusPCC7421(chromosome)	glr2396
T1446	GloeobacterviolaceusPCC7421(chromosome)	gll2429
T1447	GloeobacterviolaceusPCC7421(chromosome)	glr2432
T1448	GloeobacterviolaceusPCC7421(chromosome)	glr2609
T1449	GloeobacterviolaceusPCC7421(chromosome)	gll2687
T1450	GloeobacterviolaceusPCC7421(chromosome)	glr2725
T1451	GloeobacterviolaceusPCC7421(chromosome)	glr2735
T1452	GloeobacterviolaceusPCC7421(chromosome)	gll2899
T1453	GloeobacterviolaceusPCC7421(chromosome)	gll2931
T1454	GloeobacterviolaceusPCC7421(chromosome)	gll2955
T1455	GloeobacterviolaceusPCC7421(chromosome)	gll2982
T1456	GloeobacterviolaceusPCC7421(chromosome)	gsr3132
T1457	GloeobacterviolaceusPCC7421(chromosome)	glr3225
T1458	GloeobacterviolaceusPCC7421(chromosome)	gsr3253
T1459	GloeobacterviolaceusPCC7421(chromosome)	glr3475
T1460	GloeobacterviolaceusPCC7421(chromosome)	gsr3505
T1461	GloeobacterviolaceusPCC7421(chromosome)	gll3524
T1462	GloeobacterviolaceusPCC7421(chromosome)	gsr3528
T1463	GloeobacterviolaceusPCC7421(chromosome)	gll3555
T1464	GloeobacterviolaceusPCC7421(chromosome)	gll3798
T1465	GloeobacterviolaceusPCC7421(chromosome)	glr3875
T1466	GloeobacterviolaceusPCC7421(chromosome)	gll3981
T1467	GloeobacterviolaceusPCC7421(chromosome)	gsr4000
T1468	GloeobacterviolaceusPCC7421(chromosome)	glr4050
T1469	GloeobacterviolaceusPCC7421(chromosome)	gsl4116
T1470	GloeobacterviolaceusPCC7421(chromosome)	gsr4240
T1471	GloeobacterviolaceusPCC7421(chromosome)	glr4343
T1186	Photorhabdusluminescenssubsp.laumondiiTTO1(chromosome)	plu0179
T1187	Photorhabdusluminescenssubsp.laumondiiTTO1(chromosome)	plu0205
T1188	Photorhabdusluminescenssubsp.laumondiiTTO1(chromosome)	plu0251
T1189	Photorhabdusluminescenssubsp.laumondiiTTO1(chromosome)	plu0255
T1190	Photorhabdusluminescenssubsp.laumondiiTTO1(chromosome)	plu0284
T1191	Photorhabdusluminescenssubsp.laumondiiTTO1(chromosome)	plu0442
T1192	Photorhabdusluminescenssubsp.laumondiiTTO1(chromosome)	plu0625
T1193	Photorhabdusluminescenssubsp.laumondiiTTO1(chromosome)	plu0647
T1194	Photorhabdusluminescenssubsp.laumondiiTTO1(chromosome)	plu0707
T1195	Photorhabdusluminescenssubsp.laumondiiTTO1(chromosome)	plu0862
T1196	Photorhabdusluminescenssubsp.laumondiiTTO1(chromosome)	plu0866
T1197	Photorhabdusluminescenssubsp.laumondiiTTO1(chromosome)	plu0896
T1198	Photorhabdusluminescenssubsp.laumondiiTTO1(chromosome)	plu0929
T1199	Photorhabdusluminescenssubsp.laumondiiTTO1(chromosome)	plu0958
T1201	Photorhabdusluminescenssubsp.laumondiiTTO1(chromosome)	plu1065
T1202	Photorhabdusluminescenssubsp.laumondiiTTO1(chromosome)	plu1224
T1203	Photorhabdusluminescenssubsp.laumondiiTTO1(chromosome)	plu1326
T1204	Photorhabdusluminescenssubsp.laumondiiTTO1(chromosome)	plu1618
T1205	Photorhabdusluminescenssubsp.laumondiiTTO1(chromosome)	plu1811
T1206	Photorhabdusluminescenssubsp.laumondiiTTO1(chromosome)	plu1932
T1207	Photorhabdusluminescenssubsp.laumondiiTTO1(chromosome)	plu1974
T1208	Photorhabdusluminescenssubsp.laumondiiTTO1(chromosome)	plu2050
T1209	Photorhabdusluminescenssubsp.laumondiiTTO1(chromosome)	plu2099
T1210	Photorhabdusluminescenssubsp.laumondiiTTO1(chromosome)	plu2105
T1211	Photorhabdusluminescenssubsp.laumondiiTTO1(chromosome)	plu2126
T1212	Photorhabdusluminescenssubsp.laumondiiTTO1(chromosome)	plu2130
T1213	Photorhabdusluminescenssubsp.laumondiiTTO1(chromosome)	plu2155
T1214	Photorhabdusluminescenssubsp.laumondiiTTO1(chromosome)	plu2210
T1215	Photorhabdusluminescenssubsp.laumondiiTTO1(chromosome)	plu2251
T1216	Photorhabdusluminescenssubsp.laumondiiTTO1(chromosome)	plu2255
T1217	Photorhabdusluminescenssubsp.laumondiiTTO1(chromosome)	plu2264
T1218	Photorhabdusluminescenssubsp.laumondiiTTO1(chromosome)	plu2269
T1219	Photorhabdusluminescenssubsp.laumondiiTTO1(chromosome)	plu2279
T1220	Photorhabdusluminescenssubsp.laumondiiTTO1(chromosome)	plu2306
T1221	Photorhabdusluminescenssubsp.laumondiiTTO1(chromosome)	plu2308
T1222	Photorhabdusluminescenssubsp.laumondiiTTO1(chromosome)	plu2358
T1223	Photorhabdusluminescenssubsp.laumondiiTTO1(chromosome)	plu2365
T1224	Photorhabdusluminescenssubsp.laumondiiTTO1(chromosome)	plu2368
T1225	Photorhabdusluminescenssubsp.laumondiiTTO1(chromosome)	plu2372
T1226	Photorhabdusluminescenssubsp.laumondiiTTO1(chromosome)	plu2423
T1227	Photorhabdusluminescenssubsp.laumondiiTTO1(chromosome)	plu2537
T1228	Photorhabdusluminescenssubsp.laumondiiTTO1(chromosome)	plu2537
T1229	Photorhabdusluminescenssubsp.laumondiiTTO1(chromosome)	plu2650
T1230	Photorhabdusluminescenssubsp.laumondiiTTO1(chromosome)	plu2706
T1231	Photorhabdusluminescenssubsp.laumondiiTTO1(chromosome)	plu2845
T1232	Photorhabdusluminescenssubsp.laumondiiTTO1(chromosome)	plu3002
T1233	Photorhabdusluminescenssubsp.laumondiiTTO1(chromosome)	plu3057
T1234	Photorhabdusluminescenssubsp.laumondiiTTO1(chromosome)	plu3316
T1235	Photorhabdusluminescenssubsp.laumondiiTTO1(chromosome)	plu3492
T1236	Photorhabdusluminescenssubsp.laumondiiTTO1(chromosome)	plu3890
T1237	Photorhabdusluminescenssubsp.laumondiiTTO1(chromosome)	plu3944
T1238	Photorhabdusluminescenssubsp.laumondiiTTO1(chromosome)	plu3960
T1239	Photorhabdusluminescenssubsp.laumondiiTTO1(chromosome)	plu3981
T1240	Photorhabdusluminescenssubsp.laumondiiTTO1(chromosome)	plu4196
T1241	Photorhabdusluminescenssubsp.laumondiiTTO1(chromosome)	plu4282
T1242	Photorhabdusluminescenssubsp.laumondiiTTO1(chromosome)	plu4296
T1243	Photorhabdusluminescenssubsp.laumondiiTTO1(chromosome)	plu4353
T1244	Photorhabdusluminescenssubsp.laumondiiTTO1(chromosome)	plu4366
T1245	Photorhabdusluminescenssubsp.laumondiiTTO1(chromosome)	plu4467
T1246	Photorhabdusluminescenssubsp.laumondiiTTO1(chromosome)	plu4594
T1247	Photorhabdusluminescenssubsp.laumondiiTTO1(chromosome)	plu4633
T1248	Photorhabdusluminescenssubsp.laumondiiTTO1(chromosome)	plu4778
T1249	Photorhabdusluminescenssubsp.laumondiiTTO1(chromosome)	plu4781
T1250	Photorhabdusluminescenssubsp.laumondiiTTO1(chromosome)	plu4785
T1251	Photorhabdusluminescenssubsp.laumondiiTTO1(chromosome)	plu4900
T1804	VibriovulnificusYJ016(plasmidpYJ016)	VVP65
T1275	VibriovulnificusYJ016(chromosome)	VVA0314
T1805	Synechocystissp.PCC6803(SynechocystisPCC6803)(plasmidpSYSM)	sll5003
T1806	Synechocystissp.PCC6803(SynechocystisPCC6803)(plasmidpSYSM)	slr5017
T1807	Synechocystissp.PCC6803(SynechocystisPCC6803)(plasmidpSYSM)	ssr5020
T1808	Synechocystissp.PCC6803(SynechocystisPCC6803)(plasmidpSYSM)	sll5094
T1809	Synechocystissp.PCC6803(SynechocystisPCC6803)(plasmidpSYSM)	slr5116
T1810	Synechocystissp.PCC6803(SynechocystisPCC6803)(plasmidpSYSA)	sll7003
T1811	Synechocystissp.PCC6803(SynechocystisPCC6803)(plasmidpSYSA)	ssl7007
T1812	Synechocystissp.PCC6803(SynechocystisPCC6803)(plasmidpSYSA)	sll7030
T1813	Synechocystissp.PCC6803(SynechocystisPCC6803)(plasmidpSYSA)	sll7033
T1814	Synechocystissp.PCC6803(SynechocystisPCC6803)(plasmidpSYSA)	ssl7039
T1815	Synechocystissp.PCC6803(SynechocystisPCC6803)(plasmidpSYSA)	slr7041
T1816	Synechocystissp.PCC6803(SynechocystisPCC6803)(plasmidpSYSG)	sll8007
T1817	Synechocystissp.PCC6803(SynechocystisPCC6803)(plasmidpSYSG)	sll8011
T1818	Synechocystissp.PCC6803(SynechocystisPCC6803)(plasmidpSYSG)	slr8014
T1819	Synechocystissp.PCC6803(SynechocystisPCC6803)(plasmidpSYSG)	sll8027
T1820	Synechocystissp.PCC6803(SynechocystisPCC6803)(plasmidpSYSX)	slr6057
T1821	Synechocystissp.PCC6803(SynechocystisPCC6803)(plasmidpSYSX)	slr6100
T1822	RalstoniaeutrophaH16(plasmidmegaplasmidpHG1)	PHG172
T1823	RalstoniaeutrophaH16(plasmidmegaplasmidpHG1)	PHG194
T1824	RalstoniaeutrophaH16(plasmidmegaplasmidpHG1)	PHG381
T1475	RhodopseudomonaspalustrisCGA009(chromosome)	RPA0276
T1476	RhodopseudomonaspalustrisCGA009(chromosome)	RPA0827
T1477	RhodopseudomonaspalustrisCGA009(chromosome)	RPA0941
T1478	RhodopseudomonaspalustrisCGA009(chromosome)	RPA1281
T1479	RhodopseudomonaspalustrisCGA009(chromosome)	RPA1291
T1480	RhodopseudomonaspalustrisCGA009(chromosome)	RPA1833
T1481	RhodopseudomonaspalustrisCGA009(chromosome)	RPA1992
T1482	RhodopseudomonaspalustrisCGA009(chromosome)	RPA2139
T1483	RhodopseudomonaspalustrisCGA009(chromosome)	RPA2283
T1484	RhodopseudomonaspalustrisCGA009(chromosome)	RPA2819
T1485	RhodopseudomonaspalustrisCGA009(chromosome)	RPA3108
T1486	RhodopseudomonaspalustrisCGA009(chromosome)	RPA3131
T1487	RhodopseudomonaspalustrisCGA009(chromosome)	RPA3167
T1488	RhodopseudomonaspalustrisCGA009(chromosome)	RPA3582
T1489	RhodopseudomonaspalustrisCGA009(chromosome)	RPA3608
T1490	RhodopseudomonaspalustrisCGA009(chromosome)	RPA3826
T1491	RhodopseudomonaspalustrisCGA009(chromosome)	RPA4130
T1492	RhodopseudomonaspalustrisCGA009(chromosome)	RPA4142
T1723	LactobacillusjohnsoniiNCC533(chromosome)	LJ0293
T1724	LactobacillusjohnsoniiNCC533(chromosome)	LJ0295
T1725	LactobacillusjohnsoniiNCC533(chromosome)	LJ1241
T1726	LactobacillusjohnsoniiNCC533(chromosome)	LJ1455
T1727	LactobacillusjohnsoniiNCC533(chromosome)	LJ1458
T1728	LactobacillusjohnsoniiNCC533(chromosome)	LJ0589
T1281	BdellovibriobacteriovorusHD100(chromosome)	Bd1295
T1282	BdellovibriobacteriovorusHD100(chromosome)	Bd1707
T1283	BdellovibriobacteriovorusHD100(chromosome)	Bd3667
T1825	BacilluscereusATCC10987(plasmidpBc10987)	BCE_A0102
T1826	Pseudomonassyringaepv.phaseolicola1448A(chromosome)	PSPPH_0160
T1827	Pseudomonassyringaepv.phaseolicola1448A(chromosome)	PSPPH_0921
T1828	Pseudomonassyringaepv.phaseolicola1448A(chromosome)	PSPPH_1542
T1829	Pseudomonassyringaepv.phaseolicola1448A(chromosome)	PSPPH_1759
T1830	Pseudomonassyringaepv.phaseolicola1448A(chromosome)	PSPPH_3343
T1831	Pseudomonassyringaepv.phaseolicola1448A(chromosome)	PSPPH_4693
T1178	MethanococcusmaripaludisS2(chromosome)	MMP0476
T1179	MethanococcusmaripaludisS2(chromosome)	MMP0530
T1395	YersiniapestisbiovarMicrotusstr.91001(chromosome)	YP_0318
T1396	YersiniapestisbiovarMicrotusstr.91001(chromosome)	YP_0597
T1397	YersiniapestisbiovarMicrotusstr.91001(chromosome)	YP_0597
T1398	YersiniapestisbiovarMicrotusstr.91001(chromosome)	YP_1070
T1399	YersiniapestisbiovarMicrotusstr.91001(chromosome)	YP_1510
T1400	YersiniapestisbiovarMicrotusstr.91001(chromosome)	YP_1559
T1401	YersiniapestisbiovarMicrotusstr.91001(chromosome)	YP_1575
T1402	YersiniapestisbiovarMicrotusstr.91001(chromosome)	YP_2108
T1403	YersiniapestisbiovarMicrotusstr.91001(chromosome)	YP_2133
T1404	YersiniapestisbiovarMicrotusstr.91001(chromosome)	YP_3580
T1405	YersiniapestisbiovarMicrotusstr.91001(chromosome)	YP_3580
T1406	YersiniapestisbiovarMicrotusstr.91001(chromosome)	YP_3582
T1407	YersiniapestisbiovarMicrotusstr.91001(chromosome)	YP_3737
T1832	YersiniapestisbiovarMicrotusstr.91001(plasmidpPCP1)	YP_pPCP10
T1514	LeptospirainterrogansserovarCopenhagenistr.FiocruzL1-130	LIC10866
T1515	LeptospirainterrogansserovarCopenhagenistr.FiocruzL1-130	LIC11165
T1516	LeptospirainterrogansserovarCopenhagenistr.FiocruzL1-130	LIC11193
T1517	LeptospirainterrogansserovarCopenhagenistr.FiocruzL1-130	LIC12116
T1518	LeptospirainterrogansserovarCopenhagenistr.FiocruzL1-130	LIC12660
T1519	LeptospirainterrogansserovarCopenhagenistr.FiocruzL1-130	LIC12713
T1520	LeptospirainterrogansserovarCopenhagenistr.FiocruzL1-130	LIC13407
T1605	ThermusthermophilusHB27(chromosome)	TTC0113
T1606	ThermusthermophilusHB27(chromosome)	TTC0125
T1607	ThermusthermophilusHB27(chromosome)	TTC0266
T1608	ThermusthermophilusHB27(chromosome)	TTC0269
T1609	ThermusthermophilusHB27(chromosome)	TTC0799
T1610	ThermusthermophilusHB27(chromosome)	TTC1207
T1611	ThermusthermophilusHB27(chromosome)	TTC1285
T1613	ThermusthermophilusHB27(chromosome)	TTC1395
T1615	ThermusthermophilusHB27(chromosome)	TTC1549
T1617	ThermusthermophilusHB27(chromosome)	TTC1705
T1618	ThermusthermophilusHB27(chromosome)	TTC1804
T1619	ThermusthermophilusHB27(chromosome)	TTC1959
T1385	CandidatusProtochlamydiaamoebophilaUWE25(chromosome)	pc0990
T1386	CandidatusProtochlamydiaamoebophilaUWE25(chromosome)	pc0995
T1388	CandidatusProtochlamydiaamoebophilaUWE25(chromosome)	pc1017
T1389	CandidatusProtochlamydiaamoebophilaUWE25(chromosome)	pc1021
T1390	CandidatusProtochlamydiaamoebophilaUWE25(chromosome)	pc1442
T1391	CandidatusProtochlamydiaamoebophilaUWE25(chromosome)	pc1456
T1392	CandidatusProtochlamydiaamoebophilaUWE25(chromosome)	pc1474
T1393	CandidatusProtochlamydiaamoebophilaUWE25(chromosome)	pc1912
T1394	CandidatusProtochlamydiaamoebophilaUWE25(chromosome)	pc1923
T1833	Desulfovibriovulgarisstr.Hildenborough(plasmidpDV)	DVUA0152
T1834	PhotobacteriumprofundumSS9(plasmidpPBPR1)	PBPRC0063
T1319	PicrophilustorridusDSM9790(chromosome)	PTO0276
T1320	PicrophilustorridusDSM9790(chromosome)	PTO1512
T1499	Bacillusanthracisstr.Sterne(chromosome)	BAS0240
T1500	Bacillusanthracisstr.Sterne(chromosome)	BAS3543
T1501	Bacillusanthracisstr.Sterne(chromosome)	BAS3546
T1502	Bacillusanthracisstr.Sterne(chromosome)	BAS4607
T1641	Bartonellahenselaestr.Houston-1(chromosome)	BH02920
T1642	Bartonellahenselaestr.Houston-1(chromosome)	BH02960
T1643	Bartonellahenselaestr.Houston-1(chromosome)	BH03210
T1644	Bartonellahenselaestr.Houston-1(chromosome)	BH03370
T1645	Bartonellahenselaestr.Houston-1(chromosome)	BH03410
T1646	Bartonellahenselaestr.Houston-1(chromosome)	BH03520
T1647	Bartonellahenselaestr.Houston-1(chromosome)	BH06630
T1648	Bartonellahenselaestr.Houston-1(chromosome)	BH06810
T1649	Bartonellahenselaestr.Houston-1(chromosome)	BH07010
T1650	Bartonellahenselaestr.Houston-1(chromosome)	BH07060
T1651	Bartonellahenselaestr.Houston-1(chromosome)	BH07080
T1652	Bartonellahenselaestr.Houston-1(chromosome)	BH09480
T1603	Bacillusthuringiensisserovarkonkukianstr.97-27(chromosome)	BT9727_0226
T1604	Bacillusthuringiensisserovarkonkukianstr.97-27(chromosome)	BT9727_4443
T1353	Acinetobactersp.ADP1(chromosome)	ACIAD1637
T1354	Acinetobactersp.ADP1(chromosome)	ACIAD1801
T1355	Acinetobactersp.ADP1(chromosome)	ACIAD2182
T1356	Acinetobactersp.ADP1(chromosome)	ACIAD2379
T1252	PropionibacteriumacnesKPA171202(chromosome)	PPA0653
T1253	PropionibacteriumacnesKPA171202(chromosome)	PPA1449
T1254	PropionibacteriumacnesKPA171202(chromosome)	PPA2073
T1637	StreptococcuspyogenesMGAS10394(chromosome)	M6_Spy0022
T1638	StreptococcuspyogenesMGAS10394(chromosome)	M6_Spy0490
T1639	StreptococcuspyogenesMGAS10394(chromosome)	M6_Spy1650
T1640	StreptococcuspyogenesMGAS10394(chromosome)	M6_Spy1808
T1345	Leifsoniaxylisubsp.xylistr.CTCB07(chromosome)	Lxx22370
T1346	Leifsoniaxylisubsp.xylistr.CTCB07(chromosome)	Lxx22677
T1472	DesulfotaleapsychrophilaLSv54(chromosome)	DP0409
T1473	DesulfotaleapsychrophilaLSv54(chromosome)	DP0410
T1474	DesulfotaleapsychrophilaLSv54(chromosome)	DP2055
T1835	DesulfotaleapsychrophilaLSv54(plasmidlarge)	DPPB47
T1836	YersiniapseudotuberculosisIP32953(plasmidpYV)	pYV0026
T1521	YersiniapseudotuberculosisIP32953(chromosome)	YPTB0488
T1522	YersiniapseudotuberculosisIP32953(chromosome)	YPTB0488
T1523	YersiniapseudotuberculosisIP32953(chromosome)	YPTB0589
T1524	YersiniapseudotuberculosisIP32953(chromosome)	YPTB0763
T1525	YersiniapseudotuberculosisIP32953(chromosome)	YPTB1901
T1526	YersiniapseudotuberculosisIP32953(chromosome)	YPTB2240
T1527	YersiniapseudotuberculosisIP32953(chromosome)	YPTB2264
T1528	YersiniapseudotuberculosisIP32953(chromosome)	YPTB3124
T1529	YersiniapseudotuberculosisIP32953(chromosome)	YPTB3126
T1343	SymbiobacteriumthermophilumIAM14863(chromosome)	STH2148
T1344	SymbiobacteriumthermophilumIAM14863(chromosome)	STH2934
T1284	BacilluslicheniformisDSM13=ATCC14580(chromosome)	BL05041
T1285	BacilluslicheniformisDSM13=ATCC14580(chromosome)	BL03749
T1286	BacilluslicheniformisDSM13=ATCC14580(chromosome)	BL00646
T1357	BacilluscereusE33L(chromosome)	BCZK0228
T1358	BacilluscereusE33L(chromosome)	BCZK3457
T1359	BacilluscereusE33L(chromosome)	BCZK3460
T1360	BacilluscereusE33L(chromosome)	BCZK4461
T1837	BacteroidesfragilisYCH46(plasmidpBFY46)	BFp0024
T1262	MannheimiasucciniciproducensMBEL55E(chromosome)	MS1093
T1300	BacteroidesfragilisYCH46(chromosome)	BF0398
T1301	BacteroidesfragilisYCH46(chromosome)	BF0796
T1302	BacteroidesfragilisYCH46(chromosome)	BF1148
T1303	BacteroidesfragilisYCH46(chromosome)	BF2482
T1304	BacteroidesfragilisYCH46(chromosome)	BF2944
T1305	BacteroidesfragilisYCH46(chromosome)	BF3673
T1306	BacteroidesfragilisYCH46(chromosome)	BF3685
T1307	BacteroidesfragilisYCH46(chromosome)	BF4067
T1838	BurkholderiamalleiATCC23344(chromosome)	BMA2020
T6105	BurkholderiapseudomalleiK96243(chromosome)	BPSL0175
T1546	BurkholderiapseudomalleiK96243(chromosome)	BPSS0390
T1547	BurkholderiapseudomalleiK96243(chromosome)	BPSS0395
T1548	BurkholderiapseudomalleiK96243(chromosome)	BPSS1060
T1550	BurkholderiapseudomalleiK96243(chromosome)	BPSS1584
T1551	BurkholderiapseudomalleiK96243(chromosome)	BPSS1817
T1552	BurkholderiapseudomalleiK96243(chromosome)	BPSS1820
T6106	BurkholderiapseudomalleiK96243(chromosome)	BPSS1060
T6107	BurkholderiapseudomalleiK96243(chromosome)	BPSS0390
T6108	BurkholderiapseudomalleiK96243(chromosome)	BPSS1584
T1079	NocardiafarcinicaIFM10152(chromosome)	nfa3330
T1080	NocardiafarcinicaIFM10152(chromosome)	nfa4170
T1081	NocardiafarcinicaIFM10152(chromosome)	nfa4700
T1082	NocardiafarcinicaIFM10152(chromosome)	nfa4930
T1083	NocardiafarcinicaIFM10152(chromosome)	nfa7690
T1084	NocardiafarcinicaIFM10152(chromosome)	nfa10020
T1085	NocardiafarcinicaIFM10152(chromosome)	nfa19600
T1086	NocardiafarcinicaIFM10152(chromosome)	nfa22970
T1087	NocardiafarcinicaIFM10152(chromosome)	nfa23730
T1088	NocardiafarcinicaIFM10152(chromosome)	nfa26010
T1089	NocardiafarcinicaIFM10152(chromosome)	nfa30860
T1090	NocardiafarcinicaIFM10152(chromosome)	nfa35510
T1091	NocardiafarcinicaIFM10152(chromosome)	nfa37010
T1092	NocardiafarcinicaIFM10152(chromosome)	nfa50940
T1093	NocardiafarcinicaIFM10152(chromosome)	nfa53240
T1094	NocardiafarcinicaIFM10152(chromosome)	nfa56100
T1095	NocardiafarcinicaIFM10152(chromosome)	nfa56410
T1839	Legionellapneumophilastr.Paris(plasmidpLPP)	plpp0089
T1840	Legionellapneumophilastr.Paris(plasmidpLPP)	plpp0092
T1841	Legionellapneumophilastr.Lens(plasmidpLPL)	plpl0035
T1503	Legionellapneumophilastr.Lens(chromosome)	lpl0563
T1504	Legionellapneumophilastr.Lens(chromosome)	lpl1092
T1505	Legionellapneumophilastr.Lens(chromosome)	lpl1421
T1506	Legionellapneumophilastr.Lens(chromosome)	lpl1588
T1507	Legionellapneumophilastr.Lens(chromosome)	lpl1904
T1508	Legionellapneumophilastr.Lens(chromosome)	lpl2291
T1509	Legionellapneumophilastr.Lens(chromosome)	lpl2834
T1510	Legionellapneumophilastr.Lens(chromosome)	lpl2848
T1255	PhotobacteriumprofundumSS9(chromosome)	PBPRB0291
T1256	PhotobacteriumprofundumSS9(chromosome)	PBPRB0418
T1257	PhotobacteriumprofundumSS9(chromosome)	PBPRB0879
T1258	PhotobacteriumprofundumSS9(chromosome)	PBPRB0956
T1259	PhotobacteriumprofundumSS9(chromosome)	PBPRB1201
T1260	PhotobacteriumprofundumSS9(chromosome)	PBPRB1293
T1261	PhotobacteriumprofundumSS9(chromosome)	PBPRB1762
T1540	HaloarculamarismortuiATCC43049(chromosome)	rrnAC0586
T1541	HaloarculamarismortuiATCC43049(chromosome)	rrnAC1048
T1542	HaloarculamarismortuiATCC43049(chromosome)	rrnAC1057
T1543	HaloarculamarismortuiATCC43049(chromosome)	rrnAC1566
T1544	HaloarculamarismortuiATCC43049(chromosome)	rrnAC1674
T1545	HaloarculamarismortuiATCC43049(chromosome)	rrnAC3206
T1096	StreptococcusthermophilusLMG18311(chromosome)	stu0915
T1842	StreptococcusthermophilusCNRZ1066(chromosome)	str0914
T1361	ThermusthermophilusHB8(chromosome)	TTHA0033
T1362	ThermusthermophilusHB8(chromosome)	TTHA0047
T1363	ThermusthermophilusHB8(chromosome)	TTHA0182
T1364	ThermusthermophilusHB8(chromosome)	TTHA0426
T1365	ThermusthermophilusHB8(chromosome)	TTHA0487
T1366	ThermusthermophilusHB8(chromosome)	TTHA0499
T1367	ThermusthermophilusHB8(chromosome)	TTHA0501
T1368	ThermusthermophilusHB8(chromosome)	TTHA0632
T1369	ThermusthermophilusHB8(chromosome)	TTHA0635
T1370	ThermusthermophilusHB8(chromosome)	TTHA0639
T1371	ThermusthermophilusHB8(chromosome)	TTHA0932
T1373	ThermusthermophilusHB8(chromosome)	TTHA1052
T1374	ThermusthermophilusHB8(chromosome)	TTHA1163
T1375	ThermusthermophilusHB8(chromosome)	TTHA1202
T1376	ThermusthermophilusHB8(chromosome)	TTHA1572
T1377	ThermusthermophilusHB8(chromosome)	TTHA1649
T1378	ThermusthermophilusHB8(chromosome)	TTHA1906
T1380	ThermusthermophilusHB8(chromosome)	TTHA1913
T1843	ThermusthermophilusHB8(plasmidpTT27)	TTHB007
T1844	ThermusthermophilusHB8(plasmidpTT27)	TTHB009
T1845	ThermusthermophilusHB8(plasmidpTT27)	TTHB064
T1846	ThermusthermophilusHB8(plasmidpTT27)	TTHB108
T1847	ThermusthermophilusHB8(plasmidpTT27)	TTHB135
T1848	ThermusthermophilusHB8(plasmidpTT27)	TTHB169
T1849	ThermusthermophilusHB8(plasmidpTT27)	TTHB203
T1850	ThermusthermophilusHB8(plasmidpTT27)	TTHB233
T1851	ThermusthermophilusHB8(plasmidpTT8)	TTHC013
T1180	GeobacilluskaustophilusHTA426(chromosome)	GK0233
T1181	GeobacilluskaustophilusHTA426(chromosome)	GK1648
T1182	GeobacilluskaustophilusHTA426(chromosome)	GK1846
T1183	GeobacilluskaustophilusHTA426(chromosome)	GK1949
T1184	GeobacilluskaustophilusHTA426(chromosome)	GK2354
T1185	GeobacilluskaustophilusHTA426(chromosome)	GK3104
T1653	Salmonellaentericasubsp.entericaserovarParatyphiAstr.ATCC	SPA2761
T1654	Salmonellaentericasubsp.entericaserovarParatyphiAstr.ATCC	SPA2901
T1655	Salmonellaentericasubsp.entericaserovarParatyphiAstr.ATCC	SPA3336
T1656	Salmonellaentericasubsp.entericaserovarParatyphiAstr.ATCC	SPA3503
T1657	Salmonellaentericasubsp.entericaserovarParatyphiAstr.ATCC	SPA3745
T1658	Salmonellaentericasubsp.entericaserovarParatyphiAstr.ATCC	SPA3872
T1659	Salmonellaentericasubsp.entericaserovarParatyphiAstr.ATCC	SPA3875
T1660	Salmonellaentericasubsp.entericaserovarParatyphiAstr.ATCC	SPA4135
T1661	Salmonellaentericasubsp.entericaserovarParatyphiAstr.ATCC	SPA4250
T1662	Salmonellaentericasubsp.entericaserovarParatyphiAstr.ATCC	SPA4349
T1308	IdiomarinaloihiensisL2TR(chromosome)	IL0059
T1309	IdiomarinaloihiensisL2TR(chromosome)	IL0286
T1310	IdiomarinaloihiensisL2TR(chromosome)	IL0301
T1311	IdiomarinaloihiensisL2TR(chromosome)	IL0593
T1312	IdiomarinaloihiensisL2TR(chromosome)	IL0911
T1313	IdiomarinaloihiensisL2TR(chromosome)	IL1161
T1314	IdiomarinaloihiensisL2TR(chromosome)	IL1289
T1315	IdiomarinaloihiensisL2TR(chromosome)	IL2055
T1316	IdiomarinaloihiensisL2TR(chromosome)	IL2083
T1317	IdiomarinaloihiensisL2TR(chromosome)	IL2517
T1318	IdiomarinaloihiensisL2TR(chromosome)	IL2520
T1852	LactobacillussalivariusUCC118(plasmidpSF118-20)	pSF118-20_26
T1853	LactobacillussalivariusUCC118(plasmidpSF118-44)	LSL_1995
T1854	LactobacillussalivariusUCC118(plasmidpSF118-44)	LSL_1996
T1855	Francisellatularensissubsp.tularensisSCHUS4(chromosome)	FTT_1076
T1627	SynechococcuselongatusPCC6301(SynechococcusleopoliensisSAG)(chromosome)	syc0004_d
T1628	SynechococcuselongatusPCC6301(SynechococcusleopoliensisSAG)(chromosome)	syc0343_d
T1629	SynechococcuselongatusPCC6301(SynechococcusleopoliensisSAG)(chromosome)	syc0347_d
T1631	SynechococcuselongatusPCC6301(SynechococcusleopoliensisSAG)(chromosome)	syc0670_d
T1632	SynechococcuselongatusPCC6301(SynechococcusleopoliensisSAG)(chromosome)	syc0981_c
T1633	SynechococcuselongatusPCC6301(SynechococcusleopoliensisSAG)(chromosome)	syc0989_d
T1634	SynechococcuselongatusPCC6301(SynechococcusleopoliensisSAG)(chromosome)	syc1026_d
T1635	SynechococcuselongatusPCC6301(SynechococcusleopoliensisSAG)(chromosome)	syc1239_c
T1636	SynechococcuselongatusPCC6301(SynechococcusleopoliensisSAG)(chromosome)	syc1464_d
T1116	BacillusclausiiKSM-K16(chromosome)	ABC0809
T1117	BacillusclausiiKSM-K16(chromosome)	ABC0847
T1118	BacillusclausiiKSM-K16(chromosome)	ABC1017
T1119	BacillusclausiiKSM-K16(chromosome)	ABC1358
T1120	BacillusclausiiKSM-K16(chromosome)	ABC2855
T1553	ThermococcuskodakarensisKOD1(chromosome)	TK2306
T1554	ThermococcuskodakarensisKOD1(chromosome)	TK0016
T1555	ThermococcuskodakarensisKOD1(chromosome)	TK0063
T1556	ThermococcuskodakarensisKOD1(chromosome)	TK0066
T1557	ThermococcuskodakarensisKOD1(chromosome)	TK0128
T1558	ThermococcuskodakarensisKOD1(chromosome)	TK0137
T1559	ThermococcuskodakarensisKOD1(chromosome)	TK0176
T1560	ThermococcuskodakarensisKOD1(chromosome)	TK0191
T1561	ThermococcuskodakarensisKOD1(chromosome)	TK0212
T1562	ThermococcuskodakarensisKOD1(chromosome)	TK0222
T1563	ThermococcuskodakarensisKOD1(chromosome)	TK0334
T1564	ThermococcuskodakarensisKOD1(chromosome)	TK0341
T1565	ThermococcuskodakarensisKOD1(chromosome)	TK0343
T1566	ThermococcuskodakarensisKOD1(chromosome)	TK0371
T1567	ThermococcuskodakarensisKOD1(chromosome)	TK0374
T1568	ThermococcuskodakarensisKOD1(chromosome)	TK0456
T1569	ThermococcuskodakarensisKOD1(chromosome)	TK0542
T1570	ThermococcuskodakarensisKOD1(chromosome)	TK0696
T1571	ThermococcuskodakarensisKOD1(chromosome)	TK0734
T1572	ThermococcuskodakarensisKOD1(chromosome)	TK0791
T1573	ThermococcuskodakarensisKOD1(chromosome)	TK0889
T1574	ThermococcuskodakarensisKOD1(chromosome)	TK0910
T1575	ThermococcuskodakarensisKOD1(chromosome)	TK0918
T1576	ThermococcuskodakarensisKOD1(chromosome)	TK0962
T1577	ThermococcuskodakarensisKOD1(chromosome)	TK0965
T1578	ThermococcuskodakarensisKOD1(chromosome)	TK0972
T1579	ThermococcuskodakarensisKOD1(chromosome)	TK0998
T1580	ThermococcuskodakarensisKOD1(chromosome)	TK1014
T1581	ThermococcuskodakarensisKOD1(chromosome)	TK1027
T1582	ThermococcuskodakarensisKOD1(chromosome)	TK1069
T1583	ThermococcuskodakarensisKOD1(chromosome)	TK1073
T1584	ThermococcuskodakarensisKOD1(chromosome)	TK1075
T1585	ThermococcuskodakarensisKOD1(chromosome)	TK1128
T1586	ThermococcuskodakarensisKOD1(chromosome)	TK1185
T1587	ThermococcuskodakarensisKOD1(chromosome)	TK1256
T1588	ThermococcuskodakarensisKOD1(chromosome)	TK1290
T1589	ThermococcuskodakarensisKOD1(chromosome)	TK1476
T1590	ThermococcuskodakarensisKOD1(chromosome)	TK1510
T1592	ThermococcuskodakarensisKOD1(chromosome)	TK1644
T1593	ThermococcuskodakarensisKOD1(chromosome)	TK1709
T1594	ThermococcuskodakarensisKOD1(chromosome)	TK1751
T1595	ThermococcuskodakarensisKOD1(chromosome)	TK1763
T1596	ThermococcuskodakarensisKOD1(chromosome)	TK1816
T1597	ThermococcuskodakarensisKOD1(chromosome)	TK1995
T1598	ThermococcuskodakarensisKOD1(chromosome)	TK2005
T1599	ThermococcuskodakarensisKOD1(chromosome)	TK2067
T1600	ThermococcuskodakarensisKOD1(chromosome)	TK2155
T1601	ThermococcuskodakarensisKOD1(chromosome)	TK2228
T1602	ThermococcuskodakarensisKOD1(chromosome)	TK2262
T1856	Gluconobacteroxydans621H(plasmidpGOX1)	GOX2554
T1857	Gluconobacteroxydans621H(plasmidpGOX1)	GOX2564
T1858	Gluconobacteroxydans621H(plasmidpGOX2)	GOX2682
T1859	Gluconobacteroxydans621H(plasmidpGOX3)	GOX2706
T1351	Gluconobacteroxydans621H(chromosome)	GOX1501
T1352	Gluconobacteroxydans621H(chromosome)	GOX2472
T1668	LactobacillusacidophilusNCFM(chromosome)	LBA0031
T1669	LactobacillusacidophilusNCFM(chromosome)	LBA1372
T1670	LactobacillusacidophilusNCFM(chromosome)	LBA1402
T1671	LactobacillusacidophilusNCFM(chromosome)	LBA1405
T1860	AromatoleumaromaticumEbN1(plasmid1)	p1B136
T1861	AromatoleumaromaticumEbN1(plasmid1)	p1B244
T1620	XanthomonasoryzaeKACC10331(chromosome)	XOO0163
T1621	XanthomonasoryzaeKACC10331(chromosome)	XOO2863
T1622	XanthomonasoryzaeKACC10331(chromosome)	XOO3444
T1623	XanthomonasoryzaeKACC10331(chromosome)	XOO3459
T1624	XanthomonasoryzaeKACC10331(chromosome)	XOO3465
T1625	XanthomonasoryzaeKACC10331(chromosome)	XOO4468
T1626	XanthomonasoryzaeKACC10331(chromosome)	XOO4507
T1862	VibriofischeriES114(chromosome)	VF_1470
T1863	Salmonellaentericasubsp.entericaserovarCholeraesuisstr.(plasmidpSCV50)	SCV17
T1864	Salmonellaentericasubsp.entericaserovarCholeraesuisstr.(plasmidpSC138)	SC166
T1865	Brucellaabortusbv.1str.9-941(chromosome)	BruAb1_0264
T1866	Brucellaabortusbv.1str.9-941(chromosome)	BruAb1_0430
T1867	Brucellaabortusbv.1str.9-941(chromosome)	BruAb1_0579
T1868	Brucellaabortusbv.1str.9-941(chromosome)	BruAb1_0981
T6024	Streptococcuspyogenes(plasmidpSM19035)	pSM19035_009
T6079	Streptococcuspyogenes(plasmidpSM19035)	pSM19035_012
T6158	Streptococcuspyogenes(plasmidpSM19035)	pSM19035_013
T1869	Pseudomonassyringaepv.syringaeB728a(chromosome)	Psyr_0884
T1870	Pseudomonassyringaepv.syringaeB728a(chromosome)	Psyr_0890
T1871	Pseudomonassyringaepv.syringaeB728a(chromosome)	Psyr_0894
T1872	Pseudomonassyringaepv.syringaeB728a(chromosome)	Psyr_2924
T1873	Pseudomonassyringaepv.syringaeB728a(chromosome)	Psyr_3418
T1874	Pseudomonassyringaepv.syringaeB728a(chromosome)	Psyr_3833
T1875	Pseudomonassyringaepv.syringaeB728a(chromosome)	Psyr_4644
T6032	Pseudomonassyringaepv.syringaeB728a(chromosome)	Psyr_3804
T1876	Xanthomonascampestrispv.campestrisstr.8004(chromosome)	XC_0259
T1877	Xanthomonascampestrispv.campestrisstr.8004(chromosome)	XC_1051
T1878	Xanthomonascampestrispv.campestrisstr.8004(chromosome)	XC_1066
T1879	Xanthomonascampestrispv.campestrisstr.8004(chromosome)	XC_2327
T1880	Xanthomonascampestrispv.campestrisstr.8004(chromosome)	XC_2599
T1881	Xanthomonascampestrispv.campestrisstr.8004(chromosome)	XC_3185
T1882	Xanthomonascampestrispv.campestrisstr.8004(chromosome)	XC_3211
T1883	Xanthomonascampestrispv.campestrisstr.8004(chromosome)	XC_3521
T1884	BacilluscereusE33L(plasmidpE33L466)	pE33L466_0269
T1885	RickettsiafelisURRWXCal2(chromosome)	RF_0016
T1886	RickettsiafelisURRWXCal2(chromosome)	RF_0095
T1887	RickettsiafelisURRWXCal2(chromosome)	RF_0168
T1888	RickettsiafelisURRWXCal2(chromosome)	RF_0215
T1889	RickettsiafelisURRWXCal2(chromosome)	RF_0271
T1890	RickettsiafelisURRWXCal2(chromosome)	RF_0312
T1891	RickettsiafelisURRWXCal2(chromosome)	RF_0334
T1892	RickettsiafelisURRWXCal2(chromosome)	RF_0356
T1893	RickettsiafelisURRWXCal2(chromosome)	RF_0456
T1894	RickettsiafelisURRWXCal2(chromosome)	RF_0490
T1895	RickettsiafelisURRWXCal2(chromosome)	RF_0602
T1896	RickettsiafelisURRWXCal2(chromosome)	RF_0701
T1897	RickettsiafelisURRWXCal2(chromosome)	RF_0732
T1898	RickettsiafelisURRWXCal2(chromosome)	RF_0754
T1899	RickettsiafelisURRWXCal2(chromosome)	RF_0787
T1900	RickettsiafelisURRWXCal2(chromosome)	RF_0898
T1901	RickettsiafelisURRWXCal2(chromosome)	RF_0911
T1902	RickettsiafelisURRWXCal2(chromosome)	RF_0956
T1903	RickettsiafelisURRWXCal2(chromosome)	RF_1206
T1904	RickettsiafelisURRWXCal2(chromosome)	RF_1272
T1905	RickettsiafelisURRWXCal2(chromosome)	RF_1280
T1906	RickettsiafelisURRWXCal2(chromosome)	RF_1286
T1907	RickettsiafelisURRWXCal2(chromosome)	RF_1317
T1908	RickettsiafelisURRWXCal2(chromosome)	RF_1343
T1909	RickettsiafelisURRWXCal2(chromosome)	RF_1368
T1910	Haemophilusinfluenzae86-028NP(chromosome)	NTHI0086
T1911	Haemophilusinfluenzae86-028NP(chromosome)	NTHI0440
T1912	Haemophilusinfluenzae86-028NP(chromosome)	NTHI0781
T1913	Haemophilusinfluenzae86-028NP(chromosome)	NTHI0787
T1914	Haemophilusinfluenzae86-028NP(chromosome)	NTHI0839
T1915	Haemophilusinfluenzae86-028NP(chromosome)	NTHI1120
T1916	Haemophilusinfluenzae86-028NP(chromosome)	NTHI1426
T1917	Haemophilusinfluenzae86-028NP(chromosome)	NTHI1913
T6124	Haemophilusinfluenzae86-028NP(chromosome)	NTHI1913
T1918	StaphylococcushaemolyticusJCSC1435(chromosome)	SH0963
T1919	StaphylococcushaemolyticusJCSC1435(chromosome)	SH1803
T1920	StaphylococcushaemolyticusJCSC1435(chromosome)	SH1806
T1921	SulfolobusacidocaldariusDSM639(chromosome)	Saci_0467
T1922	SulfolobusacidocaldariusDSM639(chromosome)	Saci_1790
T1923	SulfolobusacidocaldariusDSM639(chromosome)	Saci_1813
T1924	SulfolobusacidocaldariusDSM639(chromosome)	Saci_1883
T1925	SulfolobusacidocaldariusDSM639(chromosome)	Saci_1954
T1926	SulfolobusacidocaldariusDSM639(chromosome)	Saci_1978
T1927	SulfolobusacidocaldariusDSM639(chromosome)	Saci_1981
T1928	SulfolobusacidocaldariusDSM639(chromosome)	Saci_1985
T1929	SulfolobusacidocaldariusDSM639(chromosome)	Saci_2002
T1930	SulfolobusacidocaldariusDSM639(chromosome)	Saci_2080
T1931	SulfolobusacidocaldariusDSM639(chromosome)	Saci_2192
T1932	Psychrobacterarcticus273-4(chromosome)	Psyc_0986
T1933	Psychrobacterarcticus273-4(chromosome)	Psyc_1113
T1934	Psychrobacterarcticus273-4(chromosome)	Psyc_1137
T6174	Psychrobacterarcticus273-4(chromosome)	Psyc_1266
T1935	Pseudomonassyringaepv.phaseolicola1448A(plasmidlargeplasmid)	PSPPH_A0005
T1936	Pseudomonassyringaepv.phaseolicola1448A(plasmidlargeplasmid)	PSPPH_A0034
T1937	Pseudomonassyringaepv.phaseolicola1448A(plasmidlargeplasmid)	PSPPH_A0071
T1938	Pseudomonassyringaepv.phaseolicola1448A(plasmidlargeplasmid)	PSPPH_A0095
T1939	Pseudomonassyringaepv.phaseolicola1448A(plasmidlargeplasmid)	PSPPH_A0103
T1940	Pseudomonassyringaepv.phaseolicola1448A(plasmidlargeplasmid)	PSPPH_A0136
T1941	Pseudomonassyringaepv.phaseolicola1448A(plasmidsmallplasmid)	PSPPH_B0006
T1942	Pseudomonassyringaepv.phaseolicola1448A(plasmidsmallplasmid)	PSPPH_B0016
T1943	Pseudomonassyringaepv.phaseolicola1448A(plasmidsmallplasmid)	PSPPH_B0055
T1944	StreptococcuspyogenesMGAS6180(chromosome)	M28_Spy0445
T1945	StreptococcuspyogenesMGAS6180(chromosome)	M28_Spy1031
T1946	StreptococcuspyogenesMGAS6180(chromosome)	M28_Spy1283
T1947	StreptococcuspyogenesMGAS6180(chromosome)	M28_Spy1331
T1948	StreptococcuspyogenesMGAS6180(chromosome)	M28_Spy1333
T1949	StreptococcuspyogenesMGAS6180(chromosome)	M28_Spy1631
T1950	StreptococcuspyogenesMGAS6180(chromosome)	M28_Spy1840
T1951	StreptococcuspyogenesMGAS5005(chromosome)	M5005_Spy_0457
T1952	StreptococcuspyogenesMGAS5005(chromosome)	M5005_Spy_1220
T1953	StreptococcuspyogenesMGAS5005(chromosome)	M5005_Spy_1465
T1954	StreptococcuspyogenesMGAS5005(chromosome)	M5005_Spy_1641
T1955	DechloromonasaromaticaRCB(chromosome)	Daro_0823
T1956	DechloromonasaromaticaRCB(chromosome)	Daro_2534
T1957	DechloromonasaromaticaRCB(chromosome)	Daro_2805
T1958	ThermobifidafuscaYX(chromosome)	Tfu_0091
[truncated: 4,257 more rows]

## Sheet: Antitoxins
TA_ID	Organism	Antitoxin		Obtained from TADB
AT6083	PseudomonasputidaKT2440(chromosome)	PP_1585
AT6096	StreptococcussuisSC070731(chromosome)	NJAUSS_0643
AT6292	EscherichiacoliEC302/04(chromosome)	C381_p00570
AT6293	EscherichiacoliEC302/04(chromosome)	C381_p00145
AT6294	EscherichiacoliEC302/04(chromosome)	C381_p00180
AT6295	EscherichiacoliEC302/04(chromosome)	C381_p00200
AT6296	EscherichiacoliEC302/04(chromosome)	C381_p00905
AT6125	Bacteroidesuniformis(plasmidpBUN24)	CDS_2
AT6037	Enterococcusfaecium(ICE)	Orf76
AT6036	Streptococcuspneumoniae(ICE)	Orf9
AT6092	Staphylococcusaureus(Insertion)	epsilon
AT6090	Staphylococcusequorum(TAlocus)	mazFsa
AT6084	Pseudomonasaeruginosa(plasmidpNOR-2000)	Tox2
AT6085	Pseudomonasaeruginosa(plasmidpNOR-2000)	t/at1
AT6114	unculturedbacteriumclone93(metagenomicgenecluster)
AT6095	Providenciarettgeri(plasmidpPrY2001)	09AY2001NDM_045
AT6081	Acinetobacterbaumannii(plasmidAbATCC223)	ORF3
AT6082	Acinetobacterbaumannii(plasmidAbATCC329)	ORF2
AT6025	Pseudomonassp.LM13(transposon)	ORF4
AT6291	LactobacillusplantarumplasmidpCD033(plasmid)	AKD43744
AT1321	ThermotogamaritimaMSB8(chromosome)	TM0613
AT1322	ThermotogamaritimaMSB8(chromosome)	TM0649
AT1323	ThermotogamaritimaMSB8(chromosome)	TM1000
AT1324	ThermotogamaritimaMSB8(chromosome)	TM1311
AT1325	ThermotogamaritimaMSB8(chromosome)	TM1312
AT1	AeropyrumpernixK1(chromosome)	APE_0273a
AT2	AeropyrumpernixK1(chromosome)	APE_0276a
AT3	AeropyrumpernixK1(chromosome)	APE_0279a.1
AT4	AeropyrumpernixK1(chromosome)	APE_0471b
AT5	AeropyrumpernixK1(chromosome)	APE_0760.1
AT6	AeropyrumpernixK1(chromosome)	APE_0890a.1
AT7	AeropyrumpernixK1(chromosome)	APE_1209c.1
AT8	AeropyrumpernixK1(chromosome)	APE_1272.1
AT9	AeropyrumpernixK1(chromosome)	APE_2616a
AT10	AeropyrumpernixK1(chromosome)	APE_2617a
AT11	AeropyrumpernixK1(chromosome)	APE_2617c
AT12	AeropyrumpernixK1(chromosome)	APE_2617e.1
AT979	PyrococcusabyssiGE5(chromosome)	PAB2339
AT980	PyrococcusabyssiGE5(chromosome)	PAB2324
AT981	PyrococcusabyssiGE5(chromosome)	PAB3032
AT982	PyrococcusabyssiGE5(chromosome)	PAB3103
AT983	PyrococcusabyssiGE5(chromosome)	PAB3187
AT984	PyrococcusabyssiGE5(chromosome)	PAB8218
AT985	PyrococcusabyssiGE5(chromosome)	PAB1754
AT986	PyrococcusabyssiGE5(chromosome)	PAB1672.1n
AT987	PyrococcusabyssiGE5(chromosome)	PAB7298
AT988	PyrococcusabyssiGE5(chromosome)	PAB1546
AT989	PyrococcusabyssiGE5(chromosome)	PAB1517.1n
AT990	PyrococcusabyssiGE5(chromosome)	PAB0897
AT991	PyrococcusabyssiGE5(chromosome)	PAB0899
AT992	PyrococcusabyssiGE5(chromosome)	PAB1216.1n
AT1065	HaemophilusinfluenzaeRdKW20(chromosome)	HI0074
AT1066	HaemophilusinfluenzaeRdKW20(chromosome)	HI0321
AT1067	HaemophilusinfluenzaeRdKW20(chromosome)	HI0659
AT1068	HaemophilusinfluenzaeRdKW20(chromosome)	HI0666.1
AT1069	HaemophilusinfluenzaeRdKW20(chromosome)	HI0710
AT1070	HaemophilusinfluenzaeRdKW20(chromosome)	HI0948
AT1071	HaemophilusinfluenzaeRdKW20(chromosome)	HI1251
AT1072	HaemophilusinfluenzaeRdKW20(chromosome)	HI1420
AT6156	HaemophilusinfluenzaeRdKW20(chromosome)	HI0451
AT13	MethanocaldococcusjannaschiiDSM2661(chromosome)	MJ_0070
AT14	MethanocaldococcusjannaschiiDSM2661(chromosome)	MJ_0125
AT15	MethanocaldococcusjannaschiiDSM2661(chromosome)	MJ_0127
AT16	MethanocaldococcusjannaschiiDSM2661(chromosome)	MJ_0142
AT17	MethanocaldococcusjannaschiiDSM2661(chromosome)	MJ_0434
AT18	MethanocaldococcusjannaschiiDSM2661(chromosome)	MJ_0605
AT19	MethanocaldococcusjannaschiiDSM2661(chromosome)	MJ_0975
AT20	MethanocaldococcusjannaschiiDSM2661(chromosome)	MJ_1122
AT21	MethanocaldococcusjannaschiiDSM2661(chromosome)	MJ_1172
AT22	MethanocaldococcusjannaschiiDSM2661(chromosome)	MJ_1216
AT23	MethanocaldococcusjannaschiiDSM2661(chromosome)	MJ_1304
AT24	MethanocaldococcusjannaschiiDSM2661(chromosome)	MJ_1380
AT25	MethanocaldococcusjannaschiiDSM2661(chromosome)	MJ_1548
AT26	MethanocaldococcusjannaschiiDSM2661(chromosome)	MJ_1679
AT958	Synechocystissp.PCC6803(chromosome)	ssl2733
AT959	Synechocystissp.PCC6803(chromosome)	slr0724
AT961	Synechocystissp.PCC6803(chromosome)	ssr1765
AT962	Synechocystissp.PCC6803(chromosome)	ssl2922
AT963	Synechocystissp.PCC6803(chromosome)	sll1505
AT964	Synechocystissp.PCC6803(chromosome)	ssr2962
AT965	Synechocystissp.PCC6803(chromosome)	ssl3615
AT966	Synechocystissp.PCC6803(chromosome)	slr1209
AT967	Synechocystissp.PCC6803(chromosome)	sll1714
AT968	Synechocystissp.PCC6803(chromosome)	ssl2245
AT969	Synechocystissp.PCC6803(chromosome)	sll1411
AT970	Synechocystissp.PCC6803(chromosome)	ssr2201
AT971	Synechocystissp.PCC6803(chromosome)	ssl2420
AT972	Synechocystissp.PCC6803(chromosome)	ssl2138
AT973	Synechocystissp.PCC6803(chromosome)	slr0770
AT974	Synechocystissp.PCC6803(chromosome)	ssl1300
AT976	Synechocystissp.PCC6803(chromosome)	ssl1255
AT977	Synechocystissp.PCC6803(chromosome)	ssl1004
AT978	Synechocystissp.PCC6803(chromosome)	ssr1114
AT1038	Escherichiacolistr.K-12substr.MG1655(chromosome)	b0226
AT1039	Escherichiacolistr.K-12substr.MG1655(chromosome)	b1438
AT1040	Escherichiacolistr.K-12substr.MG1655(chromosome)	b1508
AT1041	Escherichiacolistr.K-12substr.MG1655(chromosome)	b1564
AT1043	Escherichiacolistr.K-12substr.MG1655(chromosome)	b2017
AT1044	Escherichiacolistr.K-12substr.MG1655(chromosome)	b2783
AT1045	Escherichiacolistr.K-12substr.MG1655(chromosome)	b3021
AT1046	Escherichiacolistr.K-12substr.MG1655(chromosome)	b3082
AT1047	Escherichiacolistr.K-12substr.MG1655(chromosome)	b3129
AT1048	Escherichiacolistr.K-12substr.MG1655(chromosome)	b3362
AT1049	Escherichiacolistr.K-12substr.MG1655(chromosome)	b4224
AT6077	Escherichiacolistr.K-12substr.MG1655(chromosome)	b2631
AT6100	Escherichiacolistr.K-12substr.MG1655(chromosome)	b3021
AT6157	Escherichiacolistr.K-12substr.MG1655(chromosome)	b0232
AT6279	Escherichiacolistr.K-12substr.MG1655(chromosome)	b4307
AT27	Helicobacterpylori26695(chromosome)	HP0893
AT28	Helicobacterpylori26695(chromosome)	HP0895
AT6116	Helicobacterpylori26695(chromosome)	HP0895
AT6127	Helicobacterpylori26695(chromosome)	HP0893
AT29	Methanothermobacterthermautotrophicusstr.DeltaH(chromosome)	MTH304
AT30	Methanothermobacterthermautotrophicusstr.DeltaH(chromosome)	MTH409
AT31	Methanothermobacterthermautotrophicusstr.DeltaH(chromosome)	MTH463
AT32	ArchaeoglobusfulgidusDSM4304(chromosome)	AF0066
AT33	ArchaeoglobusfulgidusDSM4304(chromosome)	AF0100
AT34	ArchaeoglobusfulgidusDSM4304(chromosome)	AF0295
AT35	ArchaeoglobusfulgidusDSM4304(chromosome)	AF0298
AT36	ArchaeoglobusfulgidusDSM4304(chromosome)	AF0301
AT37	ArchaeoglobusfulgidusDSM4304(chromosome)	AF0314
AT38	ArchaeoglobusfulgidusDSM4304(chromosome)	AF0314
AT39	ArchaeoglobusfulgidusDSM4304(chromosome)	AF0316
AT40	ArchaeoglobusfulgidusDSM4304(chromosome)	AF0319
AT41	ArchaeoglobusfulgidusDSM4304(chromosome)	AF0593
AT42	ArchaeoglobusfulgidusDSM4304(chromosome)	AF0597
AT43	ArchaeoglobusfulgidusDSM4304(chromosome)	AF0947
AT44	ArchaeoglobusfulgidusDSM4304(chromosome)	AF1076
AT45	ArchaeoglobusfulgidusDSM4304(chromosome)	AF1074
AT46	ArchaeoglobusfulgidusDSM4304(chromosome)	AF1078
AT47	ArchaeoglobusfulgidusDSM4304(chromosome)	AF1081
AT48	ArchaeoglobusfulgidusDSM4304(chromosome)	AF1079
AT49	ArchaeoglobusfulgidusDSM4304(chromosome)	AF1084
AT50	ArchaeoglobusfulgidusDSM4304(chromosome)	AF1090
AT51	ArchaeoglobusfulgidusDSM4304(chromosome)	AF1092
AT52	ArchaeoglobusfulgidusDSM4304(chromosome)	AF1094
AT53	ArchaeoglobusfulgidusDSM4304(chromosome)	AF1478
AT54	ArchaeoglobusfulgidusDSM4304(chromosome)	AF1481
AT55	ArchaeoglobusfulgidusDSM4304(chromosome)	AF1585
AT56	ArchaeoglobusfulgidusDSM4304(chromosome)	AF1614
AT57	ArchaeoglobusfulgidusDSM4304(chromosome)	AF1682
AT58	ArchaeoglobusfulgidusDSM4304(chromosome)	AF1689
AT59	ArchaeoglobusfulgidusDSM4304(chromosome)	AF1712
AT60	ArchaeoglobusfulgidusDSM4304(chromosome)	AF1997
AT61	ArchaeoglobusfulgidusDSM4304(chromosome)	AF2011
AT62	ArchaeoglobusfulgidusDSM4304(chromosome)	AF2169
AT63	ArchaeoglobusfulgidusDSM4304(chromosome)	AF2189
AT64	ArchaeoglobusfulgidusDSM4304(chromosome)	AF2212
AT65	ArchaeoglobusfulgidusDSM4304(chromosome)	AF2305
AT66	ArchaeoglobusfulgidusDSM4304(chromosome)	AF2343
AT67	ArchaeoglobusfulgidusDSM4304(chromosome)	AF2359
AT68	ArchaeoglobusfulgidusDSM4304(chromosome)	AF2433
AT69	HelicobacterpyloriJ99(chromosome)	jhp0832
AT71	HelicobacterpyloriJ99(chromosome)	jhp0960
AT850	PyrococcushorikoshiiOT3(chromosome)	PH0097.2n
AT851	PyrococcushorikoshiiOT3(chromosome)	PH0389.1n
AT852	PyrococcushorikoshiiOT3(chromosome)	PH0402
AT853	PyrococcushorikoshiiOT3(chromosome)	PHS014
AT854	PyrococcushorikoshiiOT3(chromosome)	PH0457.1n
AT855	PyrococcushorikoshiiOT3(chromosome)	PH0468
AT856	PyrococcushorikoshiiOT3(chromosome)	PH0500.1n
AT857	PyrococcushorikoshiiOT3(chromosome)	PH0690
AT858	PyrococcushorikoshiiOT3(chromosome)	PH0696.1n
AT859	PyrococcushorikoshiiOT3(chromosome)	PH0707.2n
AT860	PyrococcushorikoshiiOT3(chromosome)	PHS027
AT861	PyrococcushorikoshiiOT3(chromosome)	PHS031
AT862	PyrococcushorikoshiiOT3(chromosome)	PH1297
AT72	MycobacteriumtuberculosisH37Rv(chromosome)	Rv0239
AT73	MycobacteriumtuberculosisH37Rv(chromosome)	Rv0298
AT74	MycobacteriumtuberculosisH37Rv(chromosome)	Rv0300
AT75	MycobacteriumtuberculosisH37Rv(chromosome)	Rv0550c
AT76	MycobacteriumtuberculosisH37Rv(chromosome)	Rv0581
AT77	MycobacteriumtuberculosisH37Rv(chromosome)	Rv0596c
AT78	MycobacteriumtuberculosisH37Rv(chromosome)	Rv0599c
AT79	MycobacteriumtuberculosisH37Rv(chromosome)	Rv0608
AT80	MycobacteriumtuberculosisH37Rv(chromosome)	Rv0616c
AT81	MycobacteriumtuberculosisH37Rv(chromosome)	Rv0623
AT82	MycobacteriumtuberculosisH37Rv(chromosome)	Rv0626
AT83	MycobacteriumtuberculosisH37Rv(chromosome)	Rv0657c
AT84	MycobacteriumtuberculosisH37Rv(chromosome)	Rv0660c
AT85	MycobacteriumtuberculosisH37Rv(chromosome)	Rv0662c
AT86	MycobacteriumtuberculosisH37Rv(chromosome)	Rv0664
AT87	MycobacteriumtuberculosisH37Rv(chromosome)	Rv0748
AT88	MycobacteriumtuberculosisH37Rv(chromosome)	Rv0909
AT89	MycobacteriumtuberculosisH37Rv(chromosome)	Rv0918
AT90	MycobacteriumtuberculosisH37Rv(chromosome)	Rv1103c
AT91	MycobacteriumtuberculosisH37Rv(chromosome)	Rv1113
AT92	MycobacteriumtuberculosisH37Rv(chromosome)	Rv1241
AT93	MycobacteriumtuberculosisH37Rv(chromosome)	Rv1247c
AT94	MycobacteriumtuberculosisH37Rv(chromosome)	Rv1398c
AT95	MycobacteriumtuberculosisH37Rv(chromosome)	Rv1494
AT96	MycobacteriumtuberculosisH37Rv(chromosome)	Rv1545
AT97	MycobacteriumtuberculosisH37Rv(chromosome)	Rv1560
AT98	MycobacteriumtuberculosisH37Rv(chromosome)	Rv1721c
AT99	MycobacteriumtuberculosisH37Rv(chromosome)	Rv1740
AT100	MycobacteriumtuberculosisH37Rv(chromosome)	Rv1839c
AT101	MycobacteriumtuberculosisH37Rv(chromosome)	Rv1943c
AT102	MycobacteriumtuberculosisH37Rv(chromosome)	Rv1952
AT103	MycobacteriumtuberculosisH37Rv(chromosome)	Rv1956
AT105	MycobacteriumtuberculosisH37Rv(chromosome)	Rv1960c
AT106	MycobacteriumtuberculosisH37Rv(chromosome)	Rv1990c
AT107	MycobacteriumtuberculosisH37Rv(chromosome)	Rv2009
AT108	MycobacteriumtuberculosisH37Rv(chromosome)	Rv2018
AT109	MycobacteriumtuberculosisH37Rv(chromosome)	Rv2021c
AT110	MycobacteriumtuberculosisH37Rv(chromosome)	Rv2034
AT111	MycobacteriumtuberculosisH37Rv(chromosome)	Rv2104c
AT112	MycobacteriumtuberculosisH37Rv(chromosome)	Rv2493
AT113	MycobacteriumtuberculosisH37Rv(chromosome)	Rv2526
AT114	MycobacteriumtuberculosisH37Rv(chromosome)	Rv2530A
AT115	MycobacteriumtuberculosisH37Rv(chromosome)	Rv2545
AT116	MycobacteriumtuberculosisH37Rv(chromosome)	Rv2547
AT117	MycobacteriumtuberculosisH37Rv(chromosome)	Rv2550c
AT118	MycobacteriumtuberculosisH37Rv(chromosome)	Rv2595
AT119	MycobacteriumtuberculosisH37Rv(chromosome)	Rv2601A
AT120	MycobacteriumtuberculosisH37Rv(chromosome)	Rv2654c
AT121	MycobacteriumtuberculosisH37Rv(chromosome)	Rv2758c
AT122	MycobacteriumtuberculosisH37Rv(chromosome)	Rv2760c
AT123	MycobacteriumtuberculosisH37Rv(chromosome)	Rv2830c
AT124	MycobacteriumtuberculosisH37Rv(chromosome)	Rv2865
AT125	MycobacteriumtuberculosisH37Rv(chromosome)	Rv2871
AT126	MycobacteriumtuberculosisH37Rv(chromosome)	Rv3181c
AT127	MycobacteriumtuberculosisH37Rv(chromosome)	Rv3183
AT128	MycobacteriumtuberculosisH37Rv(chromosome)	Rv3188
AT129	MycobacteriumtuberculosisH37Rv(chromosome)	Rv3321c
AT130	MycobacteriumtuberculosisH37Rv(chromosome)	Rv3357
AT131	MycobacteriumtuberculosisH37Rv(chromosome)	Rv3385c
AT132	MycobacteriumtuberculosisH37Rv(chromosome)	Rv3407
AT133	MycobacteriumtuberculosisH37Rv(chromosome)	Rv3750c
AT6240	MycobacteriumtuberculosisH37Rv(chromosome)	Rv0060
AT6241	MycobacteriumtuberculosisH37Rv(chromosome)	Rv0064A
AT6242	MycobacteriumtuberculosisH37Rv(chromosome)	Rv0456B
AT6243	MycobacteriumtuberculosisH37Rv(chromosome)	Rv0837c
AT6244	MycobacteriumtuberculosisH37Rv(chromosome)	Rv0959A
AT6245	MycobacteriumtuberculosisH37Rv(chromosome)	Rv1963c
AT6246	MycobacteriumtuberculosisH37Rv(chromosome)	Rv1982a
AT6247	MycobacteriumtuberculosisH37Rv(chromosome)	Rv1991a
AT6248	MycobacteriumtuberculosisH37Rv(chromosome)	Rv2063
AT6249	MycobacteriumtuberculosisH37Rv(chromosome)	Rv2142A
AT6250	MycobacteriumtuberculosisH37Rv(chromosome)	Rv2231B
AT6251	MycobacteriumtuberculosisH37Rv(chromosome)	Rv2274A
AT6252	MycobacteriumtuberculosisH37Rv(chromosome)	Rv2801A
AT6254	MycobacteriumtuberculosisH37Rv(chromosome)	Rv2862A
AT6255	MycobacteriumtuberculosisH37Rv(chromosome)	Rv3697A
AT134	Bacillussubtilissubsp.subtilisstr.168(chromosome)	BSU04650
AT135	Bacillussubtilissubsp.subtilisstr.168(chromosome)	BSU04820
AT136	Bacillussubtilissubsp.subtilisstr.168(chromosome)	BSU19050
AT6029	Bacillussubtilissubsp.subtilisstr.168(chromosome)	BSU12820
AT6030	Bacillussubtilissubsp.subtilisstr.168(chromosome)	BSU39290
AT137	DeinococcusradioduransR1(chromosome)	DR_0416
AT138	DeinococcusradioduransR1(chromosome)	DR_0418
AT139	DeinococcusradioduransR1(chromosome)	DR_0661
AT140	DeinococcusradioduransR1(chromosome)	DR_0661
AT141	DeinococcusradioduransR1(chromosome)	DR_0680
AT142	DeinococcusradioduransR1(chromosome)	DR_1531
AT143	DeinococcusradioduransR1(chromosome)	DR_1807
AT144	DeinococcusradioduransR1(chromosome)	DR_2103
AT1730	MethanocaldococcusjannaschiiDSM2661(plasmidlargeECE)	MJECL31
AT1731	Halobacteriumsp.NRC-1(plasmidpNRC100)	VNG7130
AT6078	EscherichiacoliO157:H7str.Sakai(plasmidpOSAK1)	pOSAK1_03
AT1732	EscherichiacoliO157:H7str.Sakai(plasmidpO157)	pO157p28
AT1733	EscherichiacoliO157:H7str.Sakai(plasmidpO157)	pO157p69
AT1076	Shigellaflexneri2b(plasmidR100)	R100p113
AT6151	EscherichiacoliB171(plasmidpB171)	pB171_044
AT6145	EscherichiacoliK-12(plasmidF)	D616_p97106
AT145	Xylellafastidiosa9a5c(chromosome)	XF0532
AT146	Xylellafastidiosa9a5c(chromosome)	XF0720
AT147	Xylellafastidiosa9a5c(chromosome)	XF1563
AT148	Xylellafastidiosa9a5c(chromosome)	XF1572
AT149	Xylellafastidiosa9a5c(chromosome)	XF1590
AT150	Xylellafastidiosa9a5c(chromosome)	XF1588
AT151	Xylellafastidiosa9a5c(chromosome)	XF1596
AT152	Xylellafastidiosa9a5c(chromosome)	XF1677
AT153	Xylellafastidiosa9a5c(chromosome)	XF1702
AT154	Xylellafastidiosa9a5c(chromosome)	XF1754
AT155	Xylellafastidiosa9a5c(chromosome)	XF1863
AT156	Xylellafastidiosa9a5c(chromosome)	XF2030
AT157	Xylellafastidiosa9a5c(chromosome)	XF2031
AT158	Xylellafastidiosa9a5c(chromosome)	XF2067
AT159	Xylellafastidiosa9a5c(chromosome)	XF2071
AT160	Xylellafastidiosa9a5c(chromosome)	XF2075
AT161	Xylellafastidiosa9a5c(chromosome)	XF2081
AT162	Xylellafastidiosa9a5c(chromosome)	XF2491
AT163	Xylellafastidiosa9a5c(chromosome)	XF2763
AT1734	Xylellafastidiosa9a5c(plasmidpXF51)	XFa0024
AT1735	Xylellafastidiosa9a5c(plasmidpXF51)	XFa0035
AT1736	Xylellafastidiosa9a5c(plasmidpXF51)	XFa0046
AT164	VibriocholeraeO1biovarElTorstr.N16961(chromosome)	VCA0312
AT165	VibriocholeraeO1biovarElTorstr.N16961(chromosome)	VCA0319
AT166	VibriocholeraeO1biovarElTorstr.N16961(chromosome)	VCA0324
AT167	VibriocholeraeO1biovarElTorstr.N16961(chromosome)	VCA0333
AT168	VibriocholeraeO1biovarElTorstr.N16961(chromosome)	VCA0349
AT169	VibriocholeraeO1biovarElTorstr.N16961(chromosome)	VCA0360
AT170	VibriocholeraeO1biovarElTorstr.N16961(chromosome)	VCA0386
AT171	VibriocholeraeO1biovarElTorstr.N16961(chromosome)	VCA0392
AT172	VibriocholeraeO1biovarElTorstr.N16961(chromosome)	VCA0422
AT173	VibriocholeraeO1biovarElTorstr.N16961(chromosome)	VCA0445
AT174	VibriocholeraeO1biovarElTorstr.N16961(chromosome)	VCA0469
AT175	VibriocholeraeO1biovarElTorstr.N16961(chromosome)	VCA0477
AT176	VibriocholeraeO1biovarElTorstr.N16961(chromosome)	VCA0482
AT177	VibriocholeraeO1biovarElTorstr.N16961(chromosome)	VCA0486
AT178	VibriocholeraeO1biovarElTorstr.N16961(chromosome)	VCA0488
AT179	VibriocholeraeO1biovarElTorstr.N16961(chromosome)	VCA0504
AT180	PseudomonasaeruginosaPAO1(chromosome)	PA0125
AT181	PseudomonasaeruginosaPAO1(chromosome)	PA1029
AT182	PseudomonasaeruginosaPAO1(chromosome)	PA1879
AT183	PseudomonasaeruginosaPAO1(chromosome)	PA3269
AT184	BacillushaloduransC-125(chromosome)	BH0521
AT185	BacillushaloduransC-125(chromosome)	BH0694
AT186	BacillushaloduransC-125(chromosome)	BH1288
AT187	BacillushaloduransC-125(chromosome)	BH2086
AT188	BacillushaloduransC-125(chromosome)	BH3549
AT189	BacillushaloduransC-125(chromosome)	BH3720
AT190	EscherichiacoliO157:H7str.EDL933(chromosome)	Z0056
AT191	EscherichiacoliO157:H7str.EDL933(chromosome)	Z0285
AT192	EscherichiacoliO157:H7str.EDL933(chromosome)	Z0509
AT193	EscherichiacoliO157:H7str.EDL933(chromosome)	Z1059
AT194	EscherichiacoliO157:H7str.EDL933(chromosome)	Z3231
AT195	EscherichiacoliO157:H7str.EDL933(chromosome)	Z4098
AT196	EscherichiacoliO157:H7str.EDL933(chromosome)	Z4435
AT197	EscherichiacoliO157:H7str.EDL933(chromosome)	Z4481
AT198	EscherichiacoliO157:H7str.EDL933(chromosome)	Z4723
AT199	EscherichiacoliO157:H7str.EDL933(chromosome)	Z4776
AT200	EscherichiacoliO157:H7str.EDL933(chromosome)	Z4833
AT201	EscherichiacoliO157:H7str.EDL933(chromosome)	Z4882
AT202	EscherichiacoliO157:H7str.EDL933(chromosome)	Z5151
AT203	EscherichiacoliO157:H7str.EDL933(chromosome)	Z5835
AT1737	Lactococcuslactissubsp.lactisIl1403(chromosome)	L38687
AT1738	Lactococcuslactissubsp.lactisIl1403(chromosome)	L39394
AT1739	Lactococcuslactissubsp.lactisIl1403(chromosome)	L53055
AT1740	Lactococcuslactissubsp.lactisIl1403(chromosome)	L53427
AT1741	Lactococcuslactissubsp.lactisIl1403(chromosome)	L197116
AT204	MesorhizobiumlotiMAFF303099(chromosome)	mlr0745
AT205	MesorhizobiumlotiMAFF303099(chromosome)	mlr1300
AT206	MesorhizobiumlotiMAFF303099(chromosome)	mlr1577
AT207	MesorhizobiumlotiMAFF303099(chromosome)	mll1671
AT208	MesorhizobiumlotiMAFF303099(chromosome)	mll1856
AT209	MesorhizobiumlotiMAFF303099(chromosome)	mll2068
AT210	MesorhizobiumlotiMAFF303099(chromosome)	mlr2150
AT211	MesorhizobiumlotiMAFF303099(chromosome)	mlr2173
AT212	MesorhizobiumlotiMAFF303099(chromosome)	mll2216
AT213	MesorhizobiumlotiMAFF303099(chromosome)	mll2255
AT214	MesorhizobiumlotiMAFF303099(chromosome)	msl3422
AT215	MesorhizobiumlotiMAFF303099(chromosome)	mll3559
AT216	MesorhizobiumlotiMAFF303099(chromosome)	mll3772
AT217	MesorhizobiumlotiMAFF303099(chromosome)	msl3900
AT218	MesorhizobiumlotiMAFF303099(chromosome)	msl5079
AT219	MesorhizobiumlotiMAFF303099(chromosome)	mll5360
AT220	MesorhizobiumlotiMAFF303099(chromosome)	msr5902
AT221	MesorhizobiumlotiMAFF303099(chromosome)	mll6136
AT222	MesorhizobiumlotiMAFF303099(chromosome)	msl6954
AT223	MesorhizobiumlotiMAFF303099(chromosome)	mlr8182
AT1742	MesorhizobiumlotiMAFF303099(plasmidpMLa)	mlr9078
AT1743	MesorhizobiumlotiMAFF303099(plasmidpMLa)	mlr9190
AT1744	MesorhizobiumlotiMAFF303099(plasmidpMLa)	mlr9262
AT1745	MesorhizobiumlotiMAFF303099(plasmidpMLa)	msl9358
AT1002	EscherichiacoliO157:H7str.Sakai(chromosome)	ECs0052
AT1003	EscherichiacoliO157:H7str.Sakai(chromosome)	ECs0253
AT1004	EscherichiacoliO157:H7str.Sakai(chromosome)	ECs0461
AT1005	EscherichiacoliO157:H7str.Sakai(chromosome)	ECs5399
AT1006	EscherichiacoliO157:H7str.Sakai(chromosome)	ECs1068
AT1008	EscherichiacoliO157:H7str.Sakai(chromosome)	ECs2280
AT1010	EscherichiacoliO157:H7str.Sakai(chromosome)	ECs2870
AT1011	EscherichiacoliO157:H7str.Sakai(chromosome)	ECs3643
AT1012	EscherichiacoliO157:H7str.Sakai(chromosome)	ECs3964
AT1013	EscherichiacoliO157:H7str.Sakai(chromosome)	ECs4007
AT1014	EscherichiacoliO157:H7str.Sakai(chromosome)	ECs4213
AT1015	EscherichiacoliO157:H7str.Sakai(chromosome)	ECs4261
AT1016	EscherichiacoliO157:H7str.Sakai(chromosome)	ECs4308
AT1017	EscherichiacoliO157:H7str.Sakai(chromosome)	ECs4356
AT1018	EscherichiacoliO157:H7str.Sakai(chromosome)	ECs4598
AT1019	EscherichiacoliO157:H7str.Sakai(chromosome)	ECs5202
AT224	CaulobactercrescentusCB15(chromosome)	CC_0032
AT225	CaulobactercrescentusCB15(chromosome)	CC_0488
AT226	CaulobactercrescentusCB15(chromosome)	CC_0803
AT227	CaulobactercrescentusCB15(chromosome)	CC_0842
AT228	CaulobactercrescentusCB15(chromosome)	CC_0874
AT229	CaulobactercrescentusCB15(chromosome)	CC_2514
AT230	CaulobactercrescentusCB15(chromosome)	CC_2736
AT231	CaulobactercrescentusCB15(chromosome)	CC_2771
AT232	CaulobactercrescentusCB15(chromosome)	CC_2879
AT233	CaulobactercrescentusCB15(chromosome)	CC_2985
AT234	CaulobactercrescentusCB15(chromosome)	CC_3037
AT235	CaulobactercrescentusCB15(chromosome)	CC_3079
AT236	CaulobactercrescentusCB15(chromosome)	CC_3185
AT6148	CaulobactercrescentusCB15(chromosome)	CC_2757
AT6147	Shigellaflexneri5astr.M90T(plasmidvirulenceplasmidpWR501)	pWR501_0258
AT745	StreptococcuspyogenesM1GAS(chromosome)	SPy_0550
AT746	StreptococcuspyogenesM1GAS(chromosome)	SPy_0939
AT747	StreptococcuspyogenesM1GAS(chromosome)	SPy_1926
AT748	StreptococcuspyogenesM1GAS(chromosome)	SPy_2127
AT6153	StreptococcuspyogenesM1GAS(chromosome)	SPy_1249
AT1073	Staphylococcusaureussubsp.aureusN315(chromosome)	SAS067
AT1074	Staphylococcusaureussubsp.aureusN315(chromosome)	SA2196
AT1075	Staphylococcusaureussubsp.aureusN315(chromosome)	SA2246
AT942	SulfolobussolfataricusP2(chromosome)	SSO1161
AT943	SulfolobussolfataricusP2(chromosome)	SSO1252
AT944	SulfolobussolfataricusP2(chromosome)	SSO1470
AT945	SulfolobussolfataricusP2(chromosome)	SSO1494
AT946	SulfolobussolfataricusP2(chromosome)	SSO1641
AT947	SulfolobussolfataricusP2(chromosome)	SSO8620
AT948	SulfolobussolfataricusP2(chromosome)	SSO1674
AT949	SulfolobussolfataricusP2(chromosome)	SSO1834
AT950	SulfolobussolfataricusP2(chromosome)	SSO1867
AT951	SulfolobussolfataricusP2(chromosome)	SSO9378
AT952	SulfolobussolfataricusP2(chromosome)	SSO2106
AT953	SulfolobussolfataricusP2(chromosome)	SSO2530
AT954	SulfolobussolfataricusP2(chromosome)	SSO2780
AT955	SulfolobussolfataricusP2(chromosome)	SSO11133
AT956	SulfolobussolfataricusP2(chromosome)	SSO11914
AT957	SulfolobussolfataricusP2(chromosome)	SSO12018
AT237	MycobacteriumtuberculosisCDC1551(chromosome)	MT0253
AT238	MycobacteriumtuberculosisCDC1551(chromosome)	MT0290
AT239	MycobacteriumtuberculosisCDC1551(chromosome)	MT0575
AT240	MycobacteriumtuberculosisCDC1551(chromosome)	MT0626
AT241	MycobacteriumtuberculosisCDC1551(chromosome)	MT0629
AT242	MycobacteriumtuberculosisCDC1551(chromosome)	MT0637
AT243	MycobacteriumtuberculosisCDC1551(chromosome)	MT0645.2
AT244	MycobacteriumtuberculosisCDC1551(chromosome)	MT0651
AT245	MycobacteriumtuberculosisCDC1551(chromosome)	MT0686
AT246	MycobacteriumtuberculosisCDC1551(chromosome)	MT0689
AT247	MycobacteriumtuberculosisCDC1551(chromosome)	MT0691
AT248	MycobacteriumtuberculosisCDC1551(chromosome)	MT0692.1
AT249	MycobacteriumtuberculosisCDC1551(chromosome)	MT0772.6
AT250	MycobacteriumtuberculosisCDC1551(chromosome)	MT0944
AT251	MycobacteriumtuberculosisCDC1551(chromosome)	MT0987
AT252	MycobacteriumtuberculosisCDC1551(chromosome)	MT1135
AT253	MycobacteriumtuberculosisCDC1551(chromosome)	MT1143.1
AT254	MycobacteriumtuberculosisCDC1551(chromosome)	MT1279
AT255	MycobacteriumtuberculosisCDC1551(chromosome)	MT1442
AT256	MycobacteriumtuberculosisCDC1551(chromosome)	MT1541
AT257	MycobacteriumtuberculosisCDC1551(chromosome)	MT1611
AT258	MycobacteriumtuberculosisCDC1551(chromosome)	MT1762
AT259	MycobacteriumtuberculosisCDC1551(chromosome)	MT1782
AT260	MycobacteriumtuberculosisCDC1551(chromosome)	MT1887
AT261	MycobacteriumtuberculosisCDC1551(chromosome)	MT2002
AT262	MycobacteriumtuberculosisCDC1551(chromosome)	MT2005
AT263	MycobacteriumtuberculosisCDC1551(chromosome)	MT2009
AT264	MycobacteriumtuberculosisCDC1551(chromosome)	MT2013
AT265	MycobacteriumtuberculosisCDC1551(chromosome)	MT2035
AT266	MycobacteriumtuberculosisCDC1551(chromosome)	MT2044
AT267	MycobacteriumtuberculosisCDC1551(chromosome)	MT2047
AT268	MycobacteriumtuberculosisCDC1551(chromosome)	MT2064.1
AT269	MycobacteriumtuberculosisCDC1551(chromosome)	MT2074
AT270	MycobacteriumtuberculosisCDC1551(chromosome)	MT2077
AT271	MycobacteriumtuberculosisCDC1551(chromosome)	MT2094
AT272	MycobacteriumtuberculosisCDC1551(chromosome)	MT2122
AT273	MycobacteriumtuberculosisCDC1551(chromosome)	MT2164
AT274	MycobacteriumtuberculosisCDC1551(chromosome)	MT2201
AT275	MycobacteriumtuberculosisCDC1551(chromosome)	MT2568
AT276	MycobacteriumtuberculosisCDC1551(chromosome)	MT2601.2
AT277	MycobacteriumtuberculosisCDC1551(chromosome)	MT2606
AT278	MycobacteriumtuberculosisCDC1551(chromosome)	MT2621
AT279	MycobacteriumtuberculosisCDC1551(chromosome)	MT2623
AT280	MycobacteriumtuberculosisCDC1551(chromosome)	MT2676
AT281	MycobacteriumtuberculosisCDC1551(chromosome)	MT2721
AT282	MycobacteriumtuberculosisCDC1551(chromosome)	MT2828
AT283	MycobacteriumtuberculosisCDC1551(chromosome)	MT2830
AT284	MycobacteriumtuberculosisCDC1551(chromosome)	MT2931
AT285	MycobacteriumtuberculosisCDC1551(chromosome)	MT3272
AT286	MycobacteriumtuberculosisCDC1551(chromosome)	MT3275
AT287	MycobacteriumtuberculosisCDC1551(chromosome)	MT3276
AT288	MycobacteriumtuberculosisCDC1551(chromosome)	MT3422
AT289	MycobacteriumtuberculosisCDC1551(chromosome)	MT3465
AT290	MycobacteriumtuberculosisCDC1551(chromosome)	MT3493
AT291	MycobacteriumtuberculosisCDC1551(chromosome)	MT3515
AT292	MycobacteriumtuberculosisCDC1551(chromosome)	MT3800
AT293	MycobacteriumtuberculosisCDC1551(chromosome)	MT3857
AT294	Staphylococcusaureussubsp.aureusMu50(chromosome)	SAV0851
AT295	Staphylococcusaureussubsp.aureusMu50(chromosome)	SAV2069
AT296	Staphylococcusaureussubsp.aureusMu50(chromosome)	SAV2408
AT297	Staphylococcusaureussubsp.aureusMu50(chromosome)	SAV2457
AT1329	BordetellabronchisepticaRB50(chromosome)	BB0528
AT1330	BordetellabronchisepticaRB50(chromosome)	BB0936
AT1331	BordetellabronchisepticaRB50(chromosome)	BB1412
AT1332	BordetellabronchisepticaRB50(chromosome)	BB1688
AT1333	BordetellabronchisepticaRB50(chromosome)	BB2140
AT1334	BordetellabronchisepticaRB50(chromosome)	BB2400
AT1335	BordetellabronchisepticaRB50(chromosome)	BB2472
AT1336	BordetellabronchisepticaRB50(chromosome)	BB2721
AT1337	BordetellabronchisepticaRB50(chromosome)	BB2742
AT1338	BordetellabronchisepticaRB50(chromosome)	BB2898
AT1339	BordetellabronchisepticaRB50(chromosome)	BB2965
AT1340	BordetellabronchisepticaRB50(chromosome)	BB3159
AT1287	Bordetellaparapertussis12822(chromosome)	BPP0379
AT1288	Bordetellaparapertussis12822(chromosome)	BPP0523
AT1289	Bordetellaparapertussis12822(chromosome)	BPP0646
AT1290	Bordetellaparapertussis12822(chromosome)	BPP1334
AT1291	Bordetellaparapertussis12822(chromosome)	BPP1403
AT1292	Bordetellaparapertussis12822(chromosome)	BPP1953
AT1293	Bordetellaparapertussis12822(chromosome)	BPP2077
AT1294	Bordetellaparapertussis12822(chromosome)	BPP2744
AT1295	Bordetellaparapertussis12822(chromosome)	BPP2764
AT1296	Bordetellaparapertussis12822(chromosome)	BPP2838
AT1297	Bordetellaparapertussis12822(chromosome)	BPP2928
AT1298	Bordetellaparapertussis12822(chromosome)	BPP2999
AT1299	Bordetellaparapertussis12822(chromosome)	BPP3142
AT1746	BordetellapertussisTohamaI(chromosome)	BP0061
AT1747	BordetellapertussisTohamaI(chromosome)	BP1290
AT1748	BordetellapertussisTohamaI(chromosome)	BP1523
AT1749	BordetellapertussisTohamaI(chromosome)	BP1584
AT1750	BordetellapertussisTohamaI(chromosome)	BP2145
AT1751	BordetellapertussisTohamaI(chromosome)	BP2623
AT1752	BordetellapertussisTohamaI(chromosome)	BP3466
AT298	ChlorobiumtepidumTLS(chromosome)	CT0332
AT299	ChlorobiumtepidumTLS(chromosome)	CT0461
AT300	ChlorobiumtepidumTLS(chromosome)	CT0820
AT1672	CorynebacteriumdiphtheriaeNCTC13129(chromosome)	DIP0008
AT1673	CorynebacteriumdiphtheriaeNCTC13129(chromosome)	DIP0796
AT1753	Dehalococcoidesmccartyi195(chromosome)	DET1517
AT1663	Desulfovibriovulgarisstr.Hildenborough(chromosome)	DVU0224
AT1664	Desulfovibriovulgarisstr.Hildenborough(chromosome)	DVU1510
AT1665	Desulfovibriovulgarisstr.Hildenborough(chromosome)	DVU1730
AT1666	Desulfovibriovulgarisstr.Hildenborough(chromosome)	DVU1736
AT1667	Desulfovibriovulgarisstr.Hildenborough(chromosome)	DVU2036
AT1530	GeobactersulfurreducensPCA(chromosome)	-
AT1531	GeobactersulfurreducensPCA(chromosome)	-
AT1532	GeobactersulfurreducensPCA(chromosome)	GSU1353
AT1533	GeobactersulfurreducensPCA(chromosome)	GSU1390
AT1534	GeobactersulfurreducensPCA(chromosome)	GSU2398
AT1535	GeobactersulfurreducensPCA(chromosome)	GSU2438
AT1536	GeobactersulfurreducensPCA(chromosome)	GSU2473
AT1280	Haemophilusducreyi35000HP(chromosome)	HD0910
AT1674	Legionellapneumophilasubsp.pneumophilastr.Philadelphia1	lpg0489
AT1675	Legionellapneumophilasubsp.pneumophilastr.Philadelphia1	lpg1605
AT1676	Legionellapneumophilasubsp.pneumophilastr.Philadelphia1	lpg1935
AT1677	Legionellapneumophilasubsp.pneumophilastr.Philadelphia1	lpg2368
AT1678	Legionellapneumophilasubsp.pneumophilastr.Philadelphia1	lpg2377
AT1679	Legionellapneumophilasubsp.pneumophilastr.Philadelphia1	lpg2914
AT1680	Legionellapneumophilasubsp.pneumophilastr.Philadelphia1	lpg2920
AT1326	Mycobacteriumaviumsubsp.paratuberculosisK-10(chromosome)	MAP1641c
AT1327	Mycobacteriumaviumsubsp.paratuberculosisK-10(chromosome)	MAP2028c
AT1328	Mycobacteriumaviumsubsp.paratuberculosisK-10(chromosome)	MAP4268c
AT1121	MycobacteriumbovisAF2122/97(chromosome)	Mb0245
AT1122	MycobacteriumbovisAF2122/97(chromosome)	Mb0306
AT1123	MycobacteriumbovisAF2122/97(chromosome)	Mb0308
AT1124	MycobacteriumbovisAF2122/97(chromosome)	Mb0565c
AT1125	MycobacteriumbovisAF2122/97(chromosome)	Mb0596
AT1126	MycobacteriumbovisAF2122/97(chromosome)	Mb0612c
AT1127	MycobacteriumbovisAF2122/97(chromosome)	Mb0615c
AT1128	MycobacteriumbovisAF2122/97(chromosome)	Mb0624
AT1129	MycobacteriumbovisAF2122/97(chromosome)	Mb0639
AT1130	MycobacteriumbovisAF2122/97(chromosome)	Mb0642
AT1131	MycobacteriumbovisAF2122/97(chromosome)	Mb0676c
AT1132	MycobacteriumbovisAF2122/97(chromosome)	Mb0679c
AT1133	MycobacteriumbovisAF2122/97(chromosome)	Mb0681c
AT1134	MycobacteriumbovisAF2122/97(chromosome)	Mb0683
AT1135	MycobacteriumbovisAF2122/97(chromosome)	Mb0769
AT1136	MycobacteriumbovisAF2122/97(chromosome)	Mb0942
AT1137	MycobacteriumbovisAF2122/97(chromosome)	Mb1133c
AT1138	MycobacteriumbovisAF2122/97(chromosome)	Mb1143
AT1139	MycobacteriumbovisAF2122/97(chromosome)	Mb1273
AT1140	MycobacteriumbovisAF2122/97(chromosome)	Mb1279c
AT1141	MycobacteriumbovisAF2122/97(chromosome)	Mb1433c
AT1142	MycobacteriumbovisAF2122/97(chromosome)	Mb1531
AT1143	MycobacteriumbovisAF2122/97(chromosome)	Mb1586
AT1144	MycobacteriumbovisAF2122/97(chromosome)	Mb1750c
AT1145	MycobacteriumbovisAF2122/97(chromosome)	Mb1769
AT1146	MycobacteriumbovisAF2122/97(chromosome)	Mb1870c
AT1147	MycobacteriumbovisAF2122/97(chromosome)	Mb1978c
AT1148	MycobacteriumbovisAF2122/97(chromosome)	Mb1987
AT1149	MycobacteriumbovisAF2122/97(chromosome)	Mb1991
AT1150	MycobacteriumbovisAF2122/97(chromosome)	Mb1995c
AT1151	MycobacteriumbovisAF2122/97(chromosome)	Mb2012c
AT1152	MycobacteriumbovisAF2122/97(chromosome)	Mb2032
AT1153	MycobacteriumbovisAF2122/97(chromosome)	Mb2041
AT1154	MycobacteriumbovisAF2122/97(chromosome)	Mb2044c
AT1155	MycobacteriumbovisAF2122/97(chromosome)	Mb2060
AT1156	MycobacteriumbovisAF2122/97(chromosome)	Mb2130c
AT1157	MycobacteriumbovisAF2122/97(chromosome)	Mb2521
AT1158	MycobacteriumbovisAF2122/97(chromosome)	Mb2555
AT1159	MycobacteriumbovisAF2122/97(chromosome)	Mb2559Ac
AT1160	MycobacteriumbovisAF2122/97(chromosome)	Mb2575
AT1161	MycobacteriumbovisAF2122/97(chromosome)	Mb2577
AT1162	MycobacteriumbovisAF2122/97(chromosome)	Mb2580c
AT1163	MycobacteriumbovisAF2122/97(chromosome)	Mb2626
AT1164	MycobacteriumbovisAF2122/97(chromosome)	Mb2633
AT1165	MycobacteriumbovisAF2122/97(chromosome)	Mb2779c
AT1166	MycobacteriumbovisAF2122/97(chromosome)	Mb2781c
AT1167	MycobacteriumbovisAF2122/97(chromosome)	Mb2854c
AT1168	MycobacteriumbovisAF2122/97(chromosome)	Mb2890
AT1169	MycobacteriumbovisAF2122/97(chromosome)	Mb2896
AT1170	MycobacteriumbovisAF2122/97(chromosome)	Mb3207c
AT1171	MycobacteriumbovisAF2122/97(chromosome)	Mb3209
AT1172	MycobacteriumbovisAF2122/97(chromosome)	Mb3210
AT1173	MycobacteriumbovisAF2122/97(chromosome)	Mb3350c
AT1174	MycobacteriumbovisAF2122/97(chromosome)	Mb3392
AT1175	MycobacteriumbovisAF2122/97(chromosome)	Mb3417c
AT1176	MycobacteriumbovisAF2122/97(chromosome)	Mb3441
AT1177	MycobacteriumbovisAF2122/97(chromosome)	Mb3776c
AT1754	NeisseriagonorrhoeaeFA1090(chromosome)	NGO0517
AT1755	NeisseriagonorrhoeaeFA1090(chromosome)	NGO0908
AT1756	NeisseriagonorrhoeaeFA1090(chromosome)	NGO1627
AT301	PseudomonasputidaKT2440(chromosome)	PP_0274
AT302	PseudomonasputidaKT2440(chromosome)	PP_0770
AT303	PseudomonasputidaKT2440(chromosome)	PP_1198
AT304	PseudomonasputidaKT2440(chromosome)	PP_1268
AT305	PseudomonasputidaKT2440(chromosome)	PP_1479
AT306	PseudomonasputidaKT2440(chromosome)	PP_1585
AT307	PseudomonasputidaKT2440(chromosome)	PP_2433
AT309	PseudomonasputidaKT2440(chromosome)	PP_2499
AT310	PseudomonasputidaKT2440(chromosome)	PP_2940
AT311	PseudomonasputidaKT2440(chromosome)	PP_3033
AT312	PseudomonasputidaKT2440(chromosome)	PP_3899
AT313	PseudomonasputidaKT2440(chromosome)	PP_4151
AT314	PseudomonasputidaKT2440(chromosome)	PP_4204
AT315	PseudomonasputidaKT2440(chromosome)	PP_4529
AT1757	PorphyromonasgingivalisW83(chromosome)	PG0857
AT1758	PorphyromonasgingivalisW83(chromosome)	PG0860
AT1276	Staphylococcusaureussubsp.aureusCOL(chromosome)	SACOL0890
AT1277	Staphylococcusaureussubsp.aureusCOL(chromosome)	SACOL2059
AT1278	Staphylococcusaureussubsp.aureusCOL(chromosome)	SACOL2405
AT1279	Staphylococcusaureussubsp.aureusCOL(chromosome)	SACOL2465
AT1537	Staphylococcusaureussubsp.aureusMRSA252(chromosome)	SAR1556
AT1538	Staphylococcusaureussubsp.aureusMRSA252(chromosome)	SAR2157
AT1539	Staphylococcusaureussubsp.aureusMRSA252(chromosome)	SAR2498
AT1381	Staphylococcusaureussubsp.aureusMSSA476(chromosome)	SAS0897
AT1382	Staphylococcusaureussubsp.aureusMSSA476(chromosome)	SAS1974
AT1383	Staphylococcusaureussubsp.aureusMSSA476(chromosome)	SAS2299
AT1384	Staphylococcusaureussubsp.aureusMSSA476(chromosome)	SAS2349
AT1681	TreponemadenticolaATCC35405(chromosome)	TDE0037
AT1682	TreponemadenticolaATCC35405(chromosome)	TDE0196
AT1683	TreponemadenticolaATCC35405(chromosome)	TDE0235
AT1684	TreponemadenticolaATCC35405(chromosome)	TDE0278
AT1685	TreponemadenticolaATCC35405(chromosome)	TDE0281
AT1686	TreponemadenticolaATCC35405(chromosome)	TDE0302
AT1687	TreponemadenticolaATCC35405(chromosome)	TDE0453
AT1688	TreponemadenticolaATCC35405(chromosome)	TDE0466
AT1689	TreponemadenticolaATCC35405(chromosome)	TDE0481
AT1690	TreponemadenticolaATCC35405(chromosome)	TDE0496
AT1691	TreponemadenticolaATCC35405(chromosome)	TDE0506
AT1692	TreponemadenticolaATCC35405(chromosome)	TDE0600
AT1693	TreponemadenticolaATCC35405(chromosome)	TDE0663
AT1694	TreponemadenticolaATCC35405(chromosome)	TDE0699
AT1695	TreponemadenticolaATCC35405(chromosome)	TDE0736
AT1696	TreponemadenticolaATCC35405(chromosome)	TDE0738
AT1697	TreponemadenticolaATCC35405(chromosome)	TDE0888
AT1698	TreponemadenticolaATCC35405(chromosome)	TDE0990
AT1699	TreponemadenticolaATCC35405(chromosome)	TDE1115
AT1700	TreponemadenticolaATCC35405(chromosome)	TDE1634
AT1701	TreponemadenticolaATCC35405(chromosome)	TDE1647
AT1702	TreponemadenticolaATCC35405(chromosome)	TDE1787
AT1703	TreponemadenticolaATCC35405(chromosome)	TDE1800
AT1704	TreponemadenticolaATCC35405(chromosome)	TDE1806
AT1705	TreponemadenticolaATCC35405(chromosome)	TDE1837
AT1706	TreponemadenticolaATCC35405(chromosome)	TDE1840
AT1707	TreponemadenticolaATCC35405(chromosome)	TDE1962
AT1708	TreponemadenticolaATCC35405(chromosome)	TDE1979
AT1709	TreponemadenticolaATCC35405(chromosome)	TDE2105
AT1710	TreponemadenticolaATCC35405(chromosome)	TDE2126
AT1711	TreponemadenticolaATCC35405(chromosome)	TDE2214
AT1712	TreponemadenticolaATCC35405(chromosome)	TDE2246
AT1713	TreponemadenticolaATCC35405(chromosome)	TDE2253
AT1714	TreponemadenticolaATCC35405(chromosome)	TDE2531
AT1715	TreponemadenticolaATCC35405(chromosome)	TDE2563
AT1716	TreponemadenticolaATCC35405(chromosome)	TDE2578
AT1717	TreponemadenticolaATCC35405(chromosome)	TDE2758
AT316	CoxiellaburnetiiRSA493(chromosome)	CBU_0285
AT317	CoxiellaburnetiiRSA493(chromosome)	CBU_0645
AT318	CoxiellaburnetiiRSA493(chromosome)	CBU_1021
AT319	CoxiellaburnetiiRSA493(chromosome)	CBU_1295
AT320	CoxiellaburnetiiRSA493(chromosome)	CBU_1691
AT321	CoxiellaburnetiiRSA493(chromosome)	CBU_1991
AT322	CoxiellaburnetiiRSA493(chromosome)	CBU_2085
AT1759	Listeriamonocytogenesserotype4bstr.F2365(chromosome)	LMOf2365_0132
AT1341	StaphylococcusepidermidisRP62A(chromosome)	SERP1550
AT1342	StaphylococcusepidermidisRP62A(chromosome)	SERP1682
AT1718	Methylococcuscapsulatusstr.Bath(chromosome)	MCA0271
AT1719	Methylococcuscapsulatusstr.Bath(chromosome)	MCA1622
AT1720	Methylococcuscapsulatusstr.Bath(chromosome)	MCA2639
AT1721	Methylococcuscapsulatusstr.Bath(chromosome)	MCA2652
AT1722	Methylococcuscapsulatusstr.Bath(chromosome)	MCA3006
AT1493	WolbachiaendosymbiontofDrosophilamelanogaster(chromosome)	WD0123
AT1494	WolbachiaendosymbiontofDrosophilamelanogaster(chromosome)	WD0125
AT1495	WolbachiaendosymbiontofDrosophilamelanogaster(chromosome)	WD0127
AT1496	WolbachiaendosymbiontofDrosophilamelanogaster(chromosome)	WD0268
AT1497	WolbachiaendosymbiontofDrosophilamelanogaster(chromosome)	WD0403
AT1498	WolbachiaendosymbiontofDrosophilamelanogaster(chromosome)	WD0599
AT323	StreptococcuspneumoniaeTIGR4(chromosome)	SP_0275
AT324	StreptococcuspneumoniaeTIGR4(chromosome)	SP_0888
AT325	StreptococcuspneumoniaeTIGR4(chromosome)	SP_1144
AT326	StreptococcuspneumoniaeTIGR4(chromosome)	SP_1224
AT327	StreptococcuspneumoniaeTIGR4(chromosome)	SP_1741
AT328	StreptococcuspneumoniaeTIGR4(chromosome)	SP_1786
AT329	StreptococcuspneumoniaeTIGR4(chromosome)	SP_1936
AT330	ClostridiumacetobutylicumATCC824(chromosome)	CA_C0493
AT331	ClostridiumacetobutylicumATCC824(chromosome)	CA_C0549
AT332	ClostridiumacetobutylicumATCC824(chromosome)	CA_C1946
AT6097	Sinorhizobiummeliloti1021(plasmidpSymA)	SMa0471
AT863	Sinorhizobiummeliloti1021(chromosome)	SMc00351
AT864	Sinorhizobiummeliloti1021(chromosome)	SMc00392
AT865	Sinorhizobiummeliloti1021(chromosome)	SMc04432
AT866	Sinorhizobiummeliloti1021(chromosome)	SMc00823
AT867	Sinorhizobiummeliloti1021(chromosome)	SMc00899
AT868	Sinorhizobiummeliloti1021(chromosome)	SMc02394
AT869	Sinorhizobiummeliloti1021(chromosome)	SMc02658
AT870	Sinorhizobiummeliloti1021(chromosome)	SMc01933
AT871	Sinorhizobiummeliloti1021(chromosome)	SMc01176
AT872	Sinorhizobiummeliloti1021(chromosome)	SMc04222
AT873	Sinorhizobiummeliloti1021(chromosome)	SMc04312
AT874	Sinorhizobiummeliloti1021(chromosome)	SMc04162
AT875	Sinorhizobiummeliloti1021(chromosome)	SMc04269
AT876	Sinorhizobiummeliloti1021(chromosome)	SMc02716
AT877	Sinorhizobiummeliloti1021(chromosome)	SMc03949
AT878	Sinorhizobiummeliloti1021(chromosome)	SMc01836
AT879	Sinorhizobiummeliloti1021(chromosome)	SMc00740
AT880	Sinorhizobiummeliloti1021(chromosome)	SMc00693
AT881	Sinorhizobiummeliloti1021(chromosome)	SMc00686
AT882	Sinorhizobiummeliloti1021(chromosome)	SMc02988
AT883	Sinorhizobiummeliloti1021(chromosome)	SMc03136
AT884	Sinorhizobiummeliloti1021(chromosome)	SMc02477
AT885	Sinorhizobiummeliloti1021(chromosome)	SMc03843
AT886	Sinorhizobiummeliloti1021(chromosome)	SMc04408
AT333	Agrobacteriumtumefaciensstr.C58(chromosome)	Atu0245
AT334	Agrobacteriumtumefaciensstr.C58(chromosome)	Atu0675
AT335	Agrobacteriumtumefaciensstr.C58(chromosome)	Atu0810
AT336	Agrobacteriumtumefaciensstr.C58(chromosome)	Atu0848
AT337	Agrobacteriumtumefaciensstr.C58(chromosome)	Atu0935
AT338	Agrobacteriumtumefaciensstr.C58(chromosome)	Atu0939
AT339	Agrobacteriumtumefaciensstr.C58(chromosome)	Atu1005
AT340	Agrobacteriumtumefaciensstr.C58(chromosome)	Atu1079
AT341	Agrobacteriumtumefaciensstr.C58(chromosome)	Atu1312
AT342	Agrobacteriumtumefaciensstr.C58(chromosome)	Atu1511
AT343	Agrobacteriumtumefaciensstr.C58(chromosome)	Atu1629
AT344	Agrobacteriumtumefaciensstr.C58(chromosome)	Atu1783
AT345	Agrobacteriumtumefaciensstr.C58(chromosome)	Atu2018
AT346	Agrobacteriumtumefaciensstr.C58(chromosome)	Atu2028
AT347	Agrobacteriumtumefaciensstr.C58(chromosome)	Atu2034
AT348	Agrobacteriumtumefaciensstr.C58(chromosome)	Atu2141
AT349	Agrobacteriumtumefaciensstr.C58(chromosome)	Atu2325
AT6098	Sinorhizobiummeliloti1021(plasmidpSymB)	SM_b21128
AT726	StreptococcuspneumoniaeR6(chromosome)	spr0252
AT727	StreptococcuspneumoniaeR6(chromosome)	spr1104
AT728	StreptococcuspneumoniaeR6(chromosome)	spr1586
AT729	StreptococcuspneumoniaeR6(chromosome)	spr1612
AT730	StreptococcuspneumoniaeR6(chromosome)	spr1753
AT6282	StreptococcuspneumoniaeR6(chromosome)	spr0951
AT350	Rickettsiaconoriistr.Malish7(chromosome)	RC0007
AT351	Rickettsiaconoriistr.Malish7(chromosome)	RC0290
AT352	Rickettsiaconoriistr.Malish7(chromosome)	RC0380
AT353	Rickettsiaconoriistr.Malish7(chromosome)	RC0477
AT354	Rickettsiaconoriistr.Malish7(chromosome)	RC0511
AT355	Rickettsiaconoriistr.Malish7(chromosome)	RC0601
AT356	Rickettsiaconoriistr.Malish7(chromosome)	RC0676
AT357	Rickettsiaconoriistr.Malish7(chromosome)	RC0825
AT358	Rickettsiaconoriistr.Malish7(chromosome)	RC0926
AT359	Rickettsiaconoriistr.Malish7(chromosome)	RC1013
AT360	Rickettsiaconoriistr.Malish7(chromosome)	RC1071
AT361	Rickettsiaconoriistr.Malish7(chromosome)	RC1154
AT362	Rickettsiaconoriistr.Malish7(chromosome)	RC1173
AT363	Rickettsiaconoriistr.Malish7(chromosome)	RC1223
AT364	Rickettsiaconoriistr.Malish7(chromosome)	RC1247
AT365	Rickettsiaconoriistr.Malish7(chromosome)	RC1319
AT366	Sulfolobustokodaiistr.7(chromosome)	STS008
AT367	Sulfolobustokodaiistr.7(chromosome)	STS011
AT368	Sulfolobustokodaiistr.7(chromosome)	STS013
AT369	Sulfolobustokodaiistr.7(chromosome)	STS035
AT370	Sulfolobustokodaiistr.7(chromosome)	ST0338
AT371	Sulfolobustokodaiistr.7(chromosome)	ST0663
AT372	Sulfolobustokodaiistr.7(chromosome)	STS084
AT373	Sulfolobustokodaiistr.7(chromosome)	ST0689
AT374	Sulfolobustokodaiistr.7(chromosome)	STS089
AT375	Sulfolobustokodaiistr.7(chromosome)	ST0750
AT376	Sulfolobustokodaiistr.7(chromosome)	ST0786
AT377	Sulfolobustokodaiistr.7(chromosome)	ST0791
AT378	Sulfolobustokodaiistr.7(chromosome)	ST0792
AT379	Sulfolobustokodaiistr.7(chromosome)	ST0800
AT380	Sulfolobustokodaiistr.7(chromosome)	STS097
AT381	Sulfolobustokodaiistr.7(chromosome)	STS101
AT382	Sulfolobustokodaiistr.7(chromosome)	STS102
AT383	Sulfolobustokodaiistr.7(chromosome)	STS119
AT384	Sulfolobustokodaiistr.7(chromosome)	ST1085
AT385	Sulfolobustokodaiistr.7(chromosome)	STS126
AT386	Sulfolobustokodaiistr.7(chromosome)	STS128
AT387	Sulfolobustokodaiistr.7(chromosome)	ST1141
AT388	Sulfolobustokodaiistr.7(chromosome)	STS144
AT389	Sulfolobustokodaiistr.7(chromosome)	STS183
AT390	Sulfolobustokodaiistr.7(chromosome)	ST1574
AT391	Sulfolobustokodaiistr.7(chromosome)	ST1594
AT392	Sulfolobustokodaiistr.7(chromosome)	STS188
AT393	Sulfolobustokodaiistr.7(chromosome)	ST1640
AT394	Sulfolobustokodaiistr.7(chromosome)	ST1641
AT395	Sulfolobustokodaiistr.7(chromosome)	ST1688
AT396	Sulfolobustokodaiistr.7(chromosome)	ST1714
AT397	Sulfolobustokodaiistr.7(chromosome)	ST1759
AT398	Sulfolobustokodaiistr.7(chromosome)	ST1931
AT399	Sulfolobustokodaiistr.7(chromosome)	STS208
AT400	Sulfolobustokodaiistr.7(chromosome)	STS214
AT401	Sulfolobustokodaiistr.7(chromosome)	STS233
AT402	Sulfolobustokodaiistr.7(chromosome)	STS235
AT403	NeisseriameningitidisMC58(chromosome)	NMB0914
AT404	NeisseriameningitidisMC58(chromosome)	NMB1117
AT405	NeisseriameningitidisMC58(chromosome)	NMB1264
AT406	NeisseriameningitidisMC58(chromosome)	NMB1666
AT407	NeisseriameningitidisMC58(chromosome)	NMB1891
AT408	NeisseriameningitidisMC58(chromosome)	NMB2037
AT1760	YersiniapestisCO92(plasmidpPCP1)	YPPCP1.08c
AT1761	YersiniapestisCO92(plasmidpMT1)	YPMT1.68A
AT409	StreptomycesavermitilisMA-4680=NBRC14893(chromosome)	SAV_218
AT410	StreptomycesavermitilisMA-4680=NBRC14893(chromosome)	SAV_830
AT411	StreptomycesavermitilisMA-4680=NBRC14893(chromosome)	SAV_1048
AT412	StreptomycesavermitilisMA-4680=NBRC14893(chromosome)	SAV_1742
AT413	StreptomycesavermitilisMA-4680=NBRC14893(chromosome)	SAV_2175
AT414	StreptomycesavermitilisMA-4680=NBRC14893(chromosome)	SAV_2798
AT415	StreptomycesavermitilisMA-4680=NBRC14893(chromosome)	SAV_3141
AT416	StreptomycesavermitilisMA-4680=NBRC14893(chromosome)	SAV_3206
AT417	StreptomycesavermitilisMA-4680=NBRC14893(chromosome)	SAV_3425
AT418	StreptomycesavermitilisMA-4680=NBRC14893(chromosome)	SAV_3617
AT419	StreptomycesavermitilisMA-4680=NBRC14893(chromosome)	SAV_3783
AT420	StreptomycesavermitilisMA-4680=NBRC14893(chromosome)	SAV_4050
AT421	StreptomycesavermitilisMA-4680=NBRC14893(chromosome)	SAV_4087
AT422	StreptomycesavermitilisMA-4680=NBRC14893(chromosome)	SAV_4430
AT423	StreptomycesavermitilisMA-4680=NBRC14893(chromosome)	SAV_4471
AT424	StreptomycesavermitilisMA-4680=NBRC14893(chromosome)	SAV_4976
AT425	StreptomycesavermitilisMA-4680=NBRC14893(chromosome)	SAV_5013
AT426	StreptomycesavermitilisMA-4680=NBRC14893(chromosome)	SAV_5200
AT427	StreptomycesavermitilisMA-4680=NBRC14893(chromosome)	SAV_5295
AT428	StreptomycesavermitilisMA-4680=NBRC14893(chromosome)	SAV_5408
AT429	StreptomycesavermitilisMA-4680=NBRC14893(chromosome)	SAV_5626
AT430	StreptomycesavermitilisMA-4680=NBRC14893(chromosome)	SAV_5693
AT431	StreptomycesavermitilisMA-4680=NBRC14893(chromosome)	SAV_5754
AT432	StreptomycesavermitilisMA-4680=NBRC14893(chromosome)	SAV_5968
AT433	StreptomycesavermitilisMA-4680=NBRC14893(chromosome)	SAV_6253
AT434	StreptomycesavermitilisMA-4680=NBRC14893(chromosome)	SAV_7086
AT435	StreptomycesavermitilisMA-4680=NBRC14893(chromosome)	SAV_7096
AT436	Salmonellaentericasubsp.entericaserovarTyphimuriumstr.LT2	STM1551
AT437	Salmonellaentericasubsp.entericaserovarTyphimuriumstr.LT2	STM2904
AT438	Salmonellaentericasubsp.entericaserovarTyphimuriumstr.LT2	STM2955.S
AT439	Salmonellaentericasubsp.entericaserovarTyphimuriumstr.LT2	STM3034
AT440	Salmonellaentericasubsp.entericaserovarTyphimuriumstr.LT2	STM3471
AT441	Salmonellaentericasubsp.entericaserovarTyphimuriumstr.LT2	STM3517
AT442	Salmonellaentericasubsp.entericaserovarTyphimuriumstr.LT2	STM3559
AT443	Salmonellaentericasubsp.entericaserovarTyphimuriumstr.LT2	STM3652
AT444	Salmonellaentericasubsp.entericaserovarTyphimuriumstr.LT2	STM3778
AT445	Salmonellaentericasubsp.entericaserovarTyphimuriumstr.LT2	STM3907
AT446	Salmonellaentericasubsp.entericaserovarTyphimuriumstr.LT2	STM4030.S
AT447	Salmonellaentericasubsp.entericaserovarTyphimuriumstr.LT2	STM4033
AT448	Salmonellaentericasubsp.entericaserovarTyphimuriumstr.LT2	STM4317
AT449	Salmonellaentericasubsp.entericaserovarTyphimuriumstr.LT2	STM4449
AT450	Salmonellaentericasubsp.entericaserovarTyphimuriumstr.LT2	STM4529
AT6086	Salmonellaentericasubsp.entericaserovarTyphimuriumstr.LT2	STM4529
AT6087	Salmonellaentericasubsp.entericaserovarTyphimuriumstr.LT2	STM4030.S
AT6088	Salmonellaentericasubsp.entericaserovarTyphimuriumstr.LT2	STM4033
AT823	Salmonellaentericasubsp.entericaserovarTyphistr.CT18	-
AT824	Salmonellaentericasubsp.entericaserovarTyphistr.CT18	STY3026
AT825	Salmonellaentericasubsp.entericaserovarTyphistr.CT18	STY3183
AT826	Salmonellaentericasubsp.entericaserovarTyphistr.CT18	STY3650
AT827	Salmonellaentericasubsp.entericaserovarTyphistr.CT18	STY3845
AT828	Salmonellaentericasubsp.entericaserovarTyphistr.CT18	STY3848
AT829	Salmonellaentericasubsp.entericaserovarTyphistr.CT18	STY4150
AT830	Salmonellaentericasubsp.entericaserovarTyphistr.CT18	STY4325
AT831	Salmonellaentericasubsp.entericaserovarTyphistr.CT18	STY4517
AT832	Salmonellaentericasubsp.entericaserovarTyphistr.CT18	STY4667
AT833	Salmonellaentericasubsp.entericaserovarTyphistr.CT18	STY4788
AT834	Salmonellaentericasubsp.entericaserovarTyphistr.CT18	STY4887
AT743	ListeriamonocytogenesEGD-e(chromosome)	lmo0114
AT744	ListeriamonocytogenesEGD-e(chromosome)	lmo0887
AT788	ListeriainnocuaClip11262(chromosome)	lin0161
AT789	ListeriainnocuaClip11262(chromosome)	lin0886
AT790	ListeriainnocuaClip11262(chromosome)	lin1234
AT791	ListeriainnocuaClip11262(chromosome)	lin1762
AT792	ListeriainnocuaClip11262(chromosome)	lin2607
AT1762	BacteroidesfragilisNCTC9343(chromosome)	BF0343
AT1763	BacteroidesfragilisNCTC9343(chromosome)	BF0726
AT1764	BacteroidesfragilisNCTC9343(chromosome)	BF1076
AT1765	BacteroidesfragilisNCTC9343(chromosome)	BF3477
AT1766	Nostocsp.PCC7120(Anabaenasp.PCC7120)(plasmidpCC7120beta)	all7501
AT1767	Nostocsp.PCC7120(Anabaenasp.PCC7120)(plasmidpCC7120epsilon)	asr9028
AT451	Nostocsp.PCC7120(Anabaenasp.PCC7120)(chromosome)	asr0148
AT452	Nostocsp.PCC7120(Anabaenasp.PCC7120)(chromosome)	all0172
AT453	Nostocsp.PCC7120(Anabaenasp.PCC7120)(chromosome)	asl0338
AT454	Nostocsp.PCC7120(Anabaenasp.PCC7120)(chromosome)	alr0501
AT455	Nostocsp.PCC7120(Anabaenasp.PCC7120)(chromosome)	asr0503
AT456	Nostocsp.PCC7120(Anabaenasp.PCC7120)(chromosome)	all0603
AT457	Nostocsp.PCC7120(Anabaenasp.PCC7120)(chromosome)	asr0682
AT458	Nostocsp.PCC7120(Anabaenasp.PCC7120)(chromosome)	all0754
AT459	Nostocsp.PCC7120(Anabaenasp.PCC7120)(chromosome)	asr0757
AT460	Nostocsp.PCC7120(Anabaenasp.PCC7120)(chromosome)	all1033
AT461	Nostocsp.PCC7120(Anabaenasp.PCC7120)(chromosome)	asl1496
AT462	Nostocsp.PCC7120(Anabaenasp.PCC7120)(chromosome)	asr1559
AT463	Nostocsp.PCC7120(Anabaenasp.PCC7120)(chromosome)	all1719
AT464	Nostocsp.PCC7120(Anabaenasp.PCC7120)(chromosome)	asl1825
AT466	Nostocsp.PCC7120(Anabaenasp.PCC7120)(chromosome)	alr1976
AT467	Nostocsp.PCC7120(Anabaenasp.PCC7120)(chromosome)	asl2101
AT468	Nostocsp.PCC7120(Anabaenasp.PCC7120)(chromosome)	asr2172
AT469	Nostocsp.PCC7120(Anabaenasp.PCC7120)(chromosome)	asl2182
AT470	Nostocsp.PCC7120(Anabaenasp.PCC7120)(chromosome)	asl2197
AT471	Nostocsp.PCC7120(Anabaenasp.PCC7120)(chromosome)	asl2401
AT472	Nostocsp.PCC7120(Anabaenasp.PCC7120)(chromosome)	all2422
AT473	Nostocsp.PCC7120(Anabaenasp.PCC7120)(chromosome)	asl2686
AT474	Nostocsp.PCC7120(Anabaenasp.PCC7120)(chromosome)	asl2713
AT475	Nostocsp.PCC7120(Anabaenasp.PCC7120)(chromosome)	asl2805
AT476	Nostocsp.PCC7120(Anabaenasp.PCC7120)(chromosome)	asl2923
AT477	Nostocsp.PCC7120(Anabaenasp.PCC7120)(chromosome)	asr2958
AT478	Nostocsp.PCC7120(Anabaenasp.PCC7120)(chromosome)	asr3005
AT479	Nostocsp.PCC7120(Anabaenasp.PCC7120)(chromosome)	asl3129
AT480	Nostocsp.PCC7120(Anabaenasp.PCC7120)(chromosome)	asl3212
AT481	Nostocsp.PCC7120(Anabaenasp.PCC7120)(chromosome)	asr3468
AT482	Nostocsp.PCC7120(Anabaenasp.PCC7120)(chromosome)	asr3478
AT483	Nostocsp.PCC7120(Anabaenasp.PCC7120)(chromosome)	asr3621
AT484	Nostocsp.PCC7120(Anabaenasp.PCC7120)(chromosome)	asr3960
AT485	Nostocsp.PCC7120(Anabaenasp.PCC7120)(chromosome)	asl3973
AT486	Nostocsp.PCC7120(Anabaenasp.PCC7120)(chromosome)	asr4133
AT487	Nostocsp.PCC7120(Anabaenasp.PCC7120)(chromosome)	asl4136
AT488	Nostocsp.PCC7120(Anabaenasp.PCC7120)(chromosome)	asl4137
AT489	Nostocsp.PCC7120(Anabaenasp.PCC7120)(chromosome)	asl4361
AT490	Nostocsp.PCC7120(Anabaenasp.PCC7120)(chromosome)	all4408
AT491	Nostocsp.PCC7120(Anabaenasp.PCC7120)(chromosome)	asr4470
AT492	Nostocsp.PCC7120(Anabaenasp.PCC7120)(chromosome)	asl4562
AT493	Nostocsp.PCC7120(Anabaenasp.PCC7120)(chromosome)	asr4600
AT494	Nostocsp.PCC7120(Anabaenasp.PCC7120)(chromosome)	all4855
AT495	Nostocsp.PCC7120(Anabaenasp.PCC7120)(chromosome)	asr4920
AT496	Nostocsp.PCC7120(Anabaenasp.PCC7120)(chromosome)	asr4951
AT497	Nostocsp.PCC7120(Anabaenasp.PCC7120)(chromosome)	all5133
AT498	Nostocsp.PCC7120(Anabaenasp.PCC7120)(chromosome)	all5131
AT499	Nostocsp.PCC7120(Anabaenasp.PCC7120)(chromosome)	alr5180
AT500	Nostocsp.PCC7120(Anabaenasp.PCC7120)(chromosome)	all5276
AT1768	Nostocsp.PCC7120(Anabaenasp.PCC7120)(plasmidpCC7120alpha)	asl7156
AT501	RalstoniasolanacearumGMI1000(chromosome)	RSc0125
AT502	RalstoniasolanacearumGMI1000(chromosome)	RSc0264
AT503	RalstoniasolanacearumGMI1000(chromosome)	RSc0872
AT504	RalstoniasolanacearumGMI1000(chromosome)	RSc0993
AT505	RalstoniasolanacearumGMI1000(chromosome)	RSc1447
AT506	RalstoniasolanacearumGMI1000(chromosome)	RSc1960
AT507	RalstoniasolanacearumGMI1000(chromosome)	RSc3056
AT508	RalstoniasolanacearumGMI1000(chromosome)	RSc3132
AT509	RalstoniasolanacearumGMI1000(chromosome)	RSc3225
AT510	RalstoniasolanacearumGMI1000(chromosome)	RSc3278
AT511	Brucellamelitensisbv.1str.16M(chromosome)	BMEI1375
AT512	Brucellamelitensisbv.1str.16M(chromosome)	BMEI1525
AT513	Pyrobaculumaerophilumstr.IM2(chromosome)	PAE0030a
AT514	Pyrobaculumaerophilumstr.IM2(chromosome)	PAE0044
AT515	Pyrobaculumaerophilumstr.IM2(chromosome)	PAE0100
AT516	Pyrobaculumaerophilumstr.IM2(chromosome)	PAE0152
AT517	Pyrobaculumaerophilumstr.IM2(chromosome)	PAE0165
AT518	Pyrobaculumaerophilumstr.IM2(chromosome)	PAE0168
AT519	Pyrobaculumaerophilumstr.IM2(chromosome)	PAE0335
AT520	Pyrobaculumaerophilumstr.IM2(chromosome)	PAE0393
AT521	Pyrobaculumaerophilumstr.IM2(chromosome)	PAE0399
AT522	Pyrobaculumaerophilumstr.IM2(chromosome)	PAE0497
AT523	Pyrobaculumaerophilumstr.IM2(chromosome)	PAE0904
AT524	Pyrobaculumaerophilumstr.IM2(chromosome)	PAE1155
AT525	Pyrobaculumaerophilumstr.IM2(chromosome)	PAE1310
AT526	Pyrobaculumaerophilumstr.IM2(chromosome)	PAE1319
AT527	Pyrobaculumaerophilumstr.IM2(chromosome)	PAE1869
AT528	Pyrobaculumaerophilumstr.IM2(chromosome)	PAE1890
AT529	Pyrobaculumaerophilumstr.IM2(chromosome)	PAE1894
AT530	Pyrobaculumaerophilumstr.IM2(chromosome)	PAE1902
AT531	Pyrobaculumaerophilumstr.IM2(chromosome)	PAE1949
AT532	Pyrobaculumaerophilumstr.IM2(chromosome)	PAE2032
AT533	Pyrobaculumaerophilumstr.IM2(chromosome)	PAE2550
AT534	Pyrobaculumaerophilumstr.IM2(chromosome)	PAE2678
AT535	Pyrobaculumaerophilumstr.IM2(chromosome)	PAE2755
AT536	Pyrobaculumaerophilumstr.IM2(chromosome)	PAE2759
AT537	Pyrobaculumaerophilumstr.IM2(chromosome)	PAE2783
AT538	Pyrobaculumaerophilumstr.IM2(chromosome)	PAE2828
AT539	Pyrobaculumaerophilumstr.IM2(chromosome)	PAE2849
AT540	Clostridiumperfringensstr.13(chromosome)	CPE0294
AT541	Clostridiumperfringensstr.13(chromosome)	CPE0815
AT542	PyrococcusfuriosusDSM3638(chromosome)	PF0355.1n
AT543	PyrococcusfuriosusDSM3638(chromosome)	PF0573
AT544	PyrococcusfuriosusDSM3638(chromosome)	PF0576
AT545	PyrococcusfuriosusDSM3638(chromosome)	PF0774
AT546	PyrococcusfuriosusDSM3638(chromosome)	PF0775
AT547	PyrococcusfuriosusDSM3638(chromosome)	PF0779
AT548	PyrococcusfuriosusDSM3638(chromosome)	PF0813
AT549	PyrococcusfuriosusDSM3638(chromosome)	PF0838
AT550	PyrococcusfuriosusDSM3638(chromosome)	PF0943
AT551	PyrococcusfuriosusDSM3638(chromosome)	PF1207
AT552	PyrococcusfuriosusDSM3638(chromosome)	PF1222
AT554	PyrococcusfuriosusDSM3638(chromosome)	PF1322
AT555	PyrococcusfuriosusDSM3638(chromosome)	PF1353
AT556	PyrococcusfuriosusDSM3638(chromosome)	PF2058
AT557	CorynebacteriumglutamicumATCC13032(chromosome)	NCgl0011
AT558	CorynebacteriumglutamicumATCC13032(chromosome)	NCgl1187
AT793	Fusobacteriumnucleatumsubsp.nucleatumATCC25586(chromosome)	FN1665
AT794	Fusobacteriumnucleatumsubsp.nucleatumATCC25586(chromosome)	FN1997
AT795	Fusobacteriumnucleatumsubsp.nucleatumATCC25586(chromosome)	FN2065
AT796	Fusobacteriumnucleatumsubsp.nucleatumATCC25586(chromosome)	FN0210
AT797	Fusobacteriumnucleatumsubsp.nucleatumATCC25586(chromosome)	FN0496
AT798	Fusobacteriumnucleatumsubsp.nucleatumATCC25586(chromosome)	FN1099
AT994	StreptococcuspyogenesMGAS8232(chromosome)	spyM18_0340
AT995	StreptococcuspyogenesMGAS8232(chromosome)	spyM18_0345
AT996	StreptococcuspyogenesMGAS8232(chromosome)	spyM18_0616
AT997	StreptococcuspyogenesMGAS8232(chromosome)	spyM18_0722
AT998	StreptococcuspyogenesMGAS8232(chromosome)	spyM18_0746
AT999	StreptococcuspyogenesMGAS8232(chromosome)	spyM18_1306
AT1000	StreptococcuspyogenesMGAS8232(chromosome)	spyM18_1804
AT1001	StreptococcuspyogenesMGAS8232(chromosome)	spyM18_1994
AT799	MethanosarcinaacetivoransC2A(chromosome)	MA0048
AT800	MethanosarcinaacetivoransC2A(chromosome)	MA0101
AT801	MethanosarcinaacetivoransC2A(chromosome)	MA0174
AT802	MethanosarcinaacetivoransC2A(chromosome)	MA0375
AT803	MethanosarcinaacetivoransC2A(chromosome)	MA0481
AT805	MethanosarcinaacetivoransC2A(chromosome)	MA0764
AT806	MethanosarcinaacetivoransC2A(chromosome)	MA0767
AT807	MethanosarcinaacetivoransC2A(chromosome)	MA1296
AT808	MethanosarcinaacetivoransC2A(chromosome)	MA1514
AT809	MethanosarcinaacetivoransC2A(chromosome)	MA1693
AT810	MethanosarcinaacetivoransC2A(chromosome)	MA1852
AT811	MethanosarcinaacetivoransC2A(chromosome)	MA2130
AT812	MethanosarcinaacetivoransC2A(chromosome)	MA2136
AT813	MethanosarcinaacetivoransC2A(chromosome)	MA2159
AT814	MethanosarcinaacetivoransC2A(chromosome)	MA2377
AT815	MethanosarcinaacetivoransC2A(chromosome)	MA2617
AT816	MethanosarcinaacetivoransC2A(chromosome)	MA2814
AT817	MethanosarcinaacetivoransC2A(chromosome)	MA3427
AT818	MethanosarcinaacetivoransC2A(chromosome)	MA3499
AT820	MethanosarcinaacetivoransC2A(chromosome)	MA4125
AT821	MethanosarcinaacetivoransC2A(chromosome)	MA4281
AT822	MethanosarcinaacetivoransC2A(chromosome)	MA4417
AT761	ThermoanaerobactertengcongensisMB4(Caldanaerobactersubterraneus)(chromosome)	TTE0453
AT762	ThermoanaerobactertengcongensisMB4(Caldanaerobactersubterraneus)(chromosome)	TTE0711
AT763	ThermoanaerobactertengcongensisMB4(Caldanaerobactersubterraneus)(chromosome)	TTE0713
AT764	ThermoanaerobactertengcongensisMB4(Caldanaerobactersubterraneus)(chromosome)	TTE0752
AT765	ThermoanaerobactertengcongensisMB4(Caldanaerobactersubterraneus)(chromosome)	TTE0858
AT766	ThermoanaerobactertengcongensisMB4(Caldanaerobactersubterraneus)(chromosome)	TTE1059
AT767	ThermoanaerobactertengcongensisMB4(Caldanaerobactersubterraneus)(chromosome)	TTE1958
AT768	ThermoanaerobactertengcongensisMB4(Caldanaerobactersubterraneus)(chromosome)	TTE1987
AT769	ThermoanaerobactertengcongensisMB4(Caldanaerobactersubterraneus)(chromosome)	TTE2030
AT770	ThermoanaerobactertengcongensisMB4(Caldanaerobactersubterraneus)(chromosome)	TTE2038
AT771	ThermoanaerobactertengcongensisMB4(Caldanaerobactersubterraneus)(chromosome)	TTE2125
AT772	ThermoanaerobactertengcongensisMB4(Caldanaerobactersubterraneus)(chromosome)	TTE2167
AT773	ThermoanaerobactertengcongensisMB4(Caldanaerobactersubterraneus)(chromosome)	TTE2583
AT774	ThermoanaerobactertengcongensisMB4(Caldanaerobactersubterraneus)(chromosome)	TTE2608
AT775	ThermoanaerobactertengcongensisMB4(Caldanaerobactersubterraneus)(chromosome)	TTE2612
AT559	StreptomycescoelicolorA3(2)(chromosome)	SCO0411
AT560	StreptomycescoelicolorA3(2)(chromosome)	SCO1249
AT561	StreptomycescoelicolorA3(2)(chromosome)	SCO1979
AT563	StreptomycescoelicolorA3(2)(chromosome)	SCO2246
AT564	StreptomycescoelicolorA3(2)(chromosome)	SCO2253
AT565	StreptomycescoelicolorA3(2)(chromosome)	SCO2381
AT566	StreptomycescoelicolorA3(2)(chromosome)	SCO2513
AT567	StreptomycescoelicolorA3(2)(chromosome)	SCO4059
AT568	StreptomycescoelicolorA3(2)(chromosome)	SCO4176
AT569	StreptomycescoelicolorA3(2)(chromosome)	SCO4301
AT570	StreptomycescoelicolorA3(2)(chromosome)	SCO4441
AT571	StreptomycescoelicolorA3(2)(chromosome)	SCO4543
AT572	StreptomycescoelicolorA3(2)(chromosome)	SCO4678
AT573	StreptomycescoelicolorA3(2)(chromosome)	SCO5125
AT574	StreptomycescoelicolorA3(2)(chromosome)	SCO5758
AT575	StreptomycescoelicolorA3(2)(chromosome)	SCO5908
AT576	StreptomycescoelicolorA3(2)(chromosome)	SCO6129
AT577	StreptomycescoelicolorA3(2)(chromosome)	SCO6236
AT578	StreptomycescoelicolorA3(2)(chromosome)	SCO6629
AT579	StreptomycescoelicolorA3(2)(chromosome)	SCO6802
AT580	StreptomycescoelicolorA3(2)(chromosome)	SCO7615
AT6122	StreptomycescoelicolorA3(2)(chromosome)	SCO2235
AT582	MethanosarcinamazeiGo1(chromosome)	MM_0022
AT584	MethanosarcinamazeiGo1(chromosome)	MM_0031
AT585	MethanosarcinamazeiGo1(chromosome)	MM_0161
AT587	MethanosarcinamazeiGo1(chromosome)	MM_0188
AT588	MethanosarcinamazeiGo1(chromosome)	MM_0208
AT589	MethanosarcinamazeiGo1(chromosome)	MM_0550
AT590	MethanosarcinamazeiGo1(chromosome)	MM_1161
AT591	MethanosarcinamazeiGo1(chromosome)	MM_1164
AT592	MethanosarcinamazeiGo1(chromosome)	MM_1473
AT593	MethanosarcinamazeiGo1(chromosome)	MM_1665
AT594	MethanosarcinamazeiGo1(chromosome)	MM_1868
AT596	MethanosarcinamazeiGo1(chromosome)	MM_1923
AT597	MethanosarcinamazeiGo1(chromosome)	MM_2473
AT598	MethanosarcinamazeiGo1(chromosome)	MM_2550
AT599	MethanosarcinamazeiGo1(chromosome)	MM_2599
AT600	MethanosarcinamazeiGo1(chromosome)	MM_2604
AT601	MethanosarcinamazeiGo1(chromosome)	MM_2607
AT602	MethanosarcinamazeiGo1(chromosome)	MM_2657
AT603	MethanosarcinamazeiGo1(chromosome)	MM_2681
AT604	Xanthomonascampestrispv.campestrisstr.ATCC33913(chromosome)	XCC0248
AT605	Xanthomonascampestrispv.campestrisstr.ATCC33913(chromosome)	XCC0715
AT606	Xanthomonascampestrispv.campestrisstr.ATCC33913(chromosome)	XCC1034
AT607	Xanthomonascampestrispv.campestrisstr.ATCC33913(chromosome)	XCC1065
AT608	Xanthomonascampestrispv.campestrisstr.ATCC33913(chromosome)	XCC1631
AT609	Xanthomonascampestrispv.campestrisstr.ATCC33913(chromosome)	XCC1861
AT610	Xanthomonascampestrispv.campestrisstr.ATCC33913(chromosome)	XCC3104
AT6146	Proteusvulgaris(plasmidRts1)	ST585_p264
AT1348	BacilluscereusATCC10987(chromosome)	BCE_0273
AT1349	BacilluscereusATCC10987(chromosome)	BCE_4622
AT1350	BacilluscereusATCC10987(chromosome)	BCE_4852
AT1769	Colwelliapsychrerythraea34H(chromosome)	CPS_2665
AT1770	RuegeriapomeroyiDSS-3(chromosome)	SPO3352
AT1511	CampylobacterjejuniRM1221(chromosome)	CJE0569
AT1512	CampylobacterjejuniRM1221(chromosome)	CJE1101
AT1513	CampylobacterjejuniRM1221(chromosome)	CJE1102
AT731	Xanthomonasaxonopodispv.citristr.306(chromosome)	XAC0080
AT732	Xanthomonasaxonopodispv.citristr.306(chromosome)	XAC0188
AT733	Xanthomonasaxonopodispv.citristr.306(chromosome)	XAC0267
AT734	Xanthomonasaxonopodispv.citristr.306(chromosome)	XAC0769
AT735	Xanthomonasaxonopodispv.citristr.306(chromosome)	XAC1140
AT736	Xanthomonasaxonopodispv.citristr.306(chromosome)	XAC1195
AT737	Xanthomonasaxonopodispv.citristr.306(chromosome)	XAC1493
AT738	Xanthomonasaxonopodispv.citristr.306(chromosome)	XAC1499
AT739	Xanthomonasaxonopodispv.citristr.306(chromosome)	XAC1883
AT740	Xanthomonasaxonopodispv.citristr.306(chromosome)	XAC2188
AT741	Xanthomonasaxonopodispv.citristr.306(chromosome)	XAC2429
AT742	Xanthomonasaxonopodispv.citristr.306(chromosome)	XAC4314
AT611	Staphylococcusaureussubsp.aureusMW2(chromosome)	MW1436
AT612	Staphylococcusaureussubsp.aureusMW2(chromosome)	MW1993
AT613	Staphylococcusaureussubsp.aureusMW2(chromosome)	MW2330
AT614	Staphylococcusaureussubsp.aureusMW2(chromosome)	MW2381
AT615	Bacillusanthracisstr.Ames(chromosome)	BA_0253
AT616	Bacillusanthracisstr.Ames(chromosome)	BA_3828
AT617	Bacillusanthracisstr.Ames(chromosome)	BA_3829
AT618	Bacillusanthracisstr.Ames(chromosome)	BA_4962
AT1771	RhizobiumetliCFN42(plasmidsymbioticplasmidp42d)	RHE_PD00081
AT1772	RhizobiumetliCFN42(plasmidsymbioticplasmidp42d)	RHE_PD00155
AT619	StreptococcuspyogenesMGAS315(chromosome)	SpyM3_0393
AT620	StreptococcuspyogenesMGAS315(chromosome)	SpyM3_0684
AT621	StreptococcuspyogenesMGAS315(chromosome)	SpyM3_0688
AT622	StreptococcuspyogenesMGAS315(chromosome)	SpyM3_1263
AT623	StreptococcuspyogenesMGAS315(chromosome)	SpyM3_1350
AT624	StreptococcuspyogenesMGAS315(chromosome)	SpyM3_1455
AT625	StreptococcuspyogenesMGAS315(chromosome)	SpyM3_1661
AT626	YersiniapestisKIM10+(chromosome)	y0240
AT627	YersiniapestisKIM10+(chromosome)	y0699
AT628	YersiniapestisKIM10+(chromosome)	y1987
AT629	YersiniapestisKIM10+(chromosome)	y2427
AT630	YersiniapestisKIM10+(chromosome)	y2490
AT1773	ThermosynechococcuselongatusBP-1(chromosome)	tll2231
AT631	Streptococcusagalactiae2603V/R(chromosome)	SAG0229
AT632	Streptococcusagalactiae2603V/R(chromosome)	SAG0435
AT633	Streptococcusagalactiae2603V/R(chromosome)	SAG0554
AT634	Streptococcusagalactiae2603V/R(chromosome)	SAG1835
AT635	Streptococcusagalactiae2603V/R(chromosome)	SAG1882
AT636	Streptococcusagalactiae2603V/R(chromosome)	SAG2009
AT637	Streptococcusagalactiae2603V/R(chromosome)	SAG2118
AT1774	PseudomonasprotegensPf-5(chromosome)	PFL_0170
AT1775	PseudomonasprotegensPf-5(chromosome)	PFL_0652
AT1776	PseudomonasprotegensPf-5(chromosome)	PFL_0750
AT1777	PseudomonasprotegensPf-5(chromosome)	PFL_1052
AT1779	PseudomonasprotegensPf-5(chromosome)	PFL_2688
AT1780	PseudomonasprotegensPf-5(chromosome)	PFL_3911
AT1781	PseudomonasprotegensPf-5(chromosome)	PFL_4043
AT1782	PseudomonasprotegensPf-5(chromosome)	PFL_5188
AT1783	PseudomonasprotegensPf-5(chromosome)	PFL_5369
AT1784	PseudomonasprotegensPf-5(chromosome)	PFL_5749
AT1785	PseudomonasprotegensPf-5(chromosome)	PFL_6112
AT1786	PseudomonasprotegensPf-5(chromosome)	PFL_6155
AT638	OceanobacillusiheyensisHTE831(chromosome)	OB0154
AT639	OceanobacillusiheyensisHTE831(chromosome)	OB0207
AT640	OceanobacillusiheyensisHTE831(chromosome)	OB0622
AT641	BifidobacteriumlongumNCC2705(chromosome)	BL1398
AT642	BifidobacteriumlongumNCC2705(chromosome)	BL1760
AT643	Brucellasuis1330(chromosome)	BR0408
AT644	Brucellasuis1330(chromosome)	BR0558
AT645	Brucellasuis1330(chromosome)	BR0974
AT646	Shigellaflexneri2astr.301(chromosome)	SF0368
AT647	Shigellaflexneri2astr.301(chromosome)	SF1549
AT648	Shigellaflexneri2astr.301(chromosome)	SF2079
AT649	Shigellaflexneri2astr.301(chromosome)	SF3122
AT650	Shigellaflexneri2astr.301(chromosome)	SF3381
AT651	Shigellaflexneri2astr.301(chromosome)	SF3433
AT652	LeptospirainterrogansserovarLaistr.56601(chromosome)	LA_1002
AT653	LeptospirainterrogansserovarLaistr.56601(chromosome)	LA_1780
AT654	LeptospirainterrogansserovarLaistr.56601(chromosome)	LA_1798
AT655	LeptospirainterrogansserovarLaistr.56601(chromosome)	LA_2844
AT656	LeptospirainterrogansserovarLaistr.56601(chromosome)	LA_3275
AT657	ShewanellaoneidensisMR-1(chromosome)	SO_0637
AT658	ShewanellaoneidensisMR-1(chromosome)	SO_0705
AT659	ShewanellaoneidensisMR-1(chromosome)	SO_1445
AT660	ShewanellaoneidensisMR-1(chromosome)	SO_3166
AT661	ShewanellaoneidensisMR-1(chromosome)	SO_3169
AT662	ShewanellaoneidensisMR-1(chromosome)	SO_4642
AT1787	ShewanellaoneidensisMR-1(plasmidmegaplasmid)	SO_A0023
AT1788	ShewanellaoneidensisMR-1(plasmidmegaplasmid)	SO_A0059
AT1789	ShewanellaoneidensisMR-1(plasmidmegaplasmid)	SO_A0068
AT1790	ShewanellaoneidensisMR-1(plasmidmegaplasmid)	SO_A0071
AT1791	ShewanellaoneidensisMR-1(plasmidmegaplasmid)	SO_A0078
AT1792	ShewanellaoneidensisMR-1(plasmidmegaplasmid)	SO_A0087
AT1793	ShewanellaoneidensisMR-1(plasmidmegaplasmid)	SO_A0185
AT663	StreptococcusmutansUA159(chromosome)	SMU_172
AT664	StreptococcusmutansUA159(chromosome)	SMU_218
AT665	StreptococcusmutansUA159(chromosome)	SMU_895
AT666	StreptococcusmutansUA159(chromosome)	SMU_1768c
AT887	StreptococcusagalactiaeNEM316(chromosome)	gbs0222
AT888	StreptococcusagalactiaeNEM316(chromosome)	gbs0471
AT889	StreptococcusagalactiaeNEM316(chromosome)	gbs0475
AT667	CorynebacteriumefficiensYS-314(chromosome)	CE0014
AT668	CorynebacteriumefficiensYS-314(chromosome)	CE0818
AT669	CorynebacteriumefficiensYS-314(chromosome)	CE1255
AT670	CorynebacteriumefficiensYS-314(chromosome)	CE2748
AT671	EscherichiacoliCFT073(chromosome)	c0059
AT672	EscherichiacoliCFT073(chromosome)	c1909
AT673	EscherichiacoliCFT073(chromosome)	c1941
AT674	EscherichiacoliCFT073(chromosome)	c2545
AT675	EscherichiacoliCFT073(chromosome)	c3273
AT676	EscherichiacoliCFT073(chromosome)	c3840
AT677	EscherichiacoliCFT073(chromosome)	c3884
AT678	EscherichiacoliCFT073(chromosome)	c4137
AT679	EscherichiacoliCFT073(chromosome)	c4179
AT680	EscherichiacoliCFT073(chromosome)	c4838
AT681	EscherichiacoliCFT073(chromosome)	c5295
AT682	EscherichiacoliCFT073(chromosome)	c5477
AT683	EscherichiacoliCFT073(chromosome)	c5475
AT6130	ErwiniapyrifoliaeEp1/96(plasmidpEP36)	pEP36_012
AT684	VibriovulnificusCMCP6(chromosome)	VV1_0111
AT685	VibriovulnificusCMCP6(chromosome)	VV1_0402
AT686	VibriovulnificusCMCP6(chromosome)	VV1_2046
AT687	VibriovulnificusCMCP6(chromosome)	VV1_2191
AT688	VibriovulnificusCMCP6(chromosome)	VV1_2409
AT689	VibriovulnificusCMCP6(chromosome)	VV1_2432
AT690	VibriovulnificusCMCP6(chromosome)	VV1_2526
AT691	VibriovulnificusCMCP6(chromosome)	VV1_2538
AT692	VibriovulnificusCMCP6(chromosome)	VV1_2546
AT993	StaphylococcusepidermidisATCC12228(chromosome)	SE1673
AT835	BradyrhizobiumdiazoefficiensUSDA110(chromosome)	bll0070
AT836	BradyrhizobiumdiazoefficiensUSDA110(chromosome)	blr0609
AT837	BradyrhizobiumdiazoefficiensUSDA110(chromosome)	blr0846
AT838	BradyrhizobiumdiazoefficiensUSDA110(chromosome)	blr1115
AT839	BradyrhizobiumdiazoefficiensUSDA110(chromosome)	bll1669
AT840	BradyrhizobiumdiazoefficiensUSDA110(chromosome)	bll1688
AT841	BradyrhizobiumdiazoefficiensUSDA110(chromosome)	bsl1986
AT842	BradyrhizobiumdiazoefficiensUSDA110(chromosome)	blr2114
AT843	BradyrhizobiumdiazoefficiensUSDA110(chromosome)	bsl2435
AT844	BradyrhizobiumdiazoefficiensUSDA110(chromosome)	bll3011
AT845	BradyrhizobiumdiazoefficiensUSDA110(chromosome)	blr4004
AT846	BradyrhizobiumdiazoefficiensUSDA110(chromosome)	bll5291
AT847	BradyrhizobiumdiazoefficiensUSDA110(chromosome)	blr5652
AT848	BradyrhizobiumdiazoefficiensUSDA110(chromosome)	blr6750
AT849	BradyrhizobiumdiazoefficiensUSDA110(chromosome)	blr7359
AT1097	PectobacteriumatrosepticumSCRI1043(chromosome)	ECA0064
AT1098	PectobacteriumatrosepticumSCRI1043(chromosome)	ECA0126
AT1099	PectobacteriumatrosepticumSCRI1043(chromosome)	ECA0254
AT1100	PectobacteriumatrosepticumSCRI1043(chromosome)	ECA0325
AT1101	PectobacteriumatrosepticumSCRI1043(chromosome)	ECA0367
AT1102	PectobacteriumatrosepticumSCRI1043(chromosome)	ECA0408
AT1103	PectobacteriumatrosepticumSCRI1043(chromosome)	ECA0444
AT1104	PectobacteriumatrosepticumSCRI1043(chromosome)	ECA0583
AT1105	PectobacteriumatrosepticumSCRI1043(chromosome)	ECA0673
AT1106	PectobacteriumatrosepticumSCRI1043(chromosome)	ECA0958
AT1107	PectobacteriumatrosepticumSCRI1043(chromosome)	ECA1467
AT1108	PectobacteriumatrosepticumSCRI1043(chromosome)	ECA1677
AT1109	PectobacteriumatrosepticumSCRI1043(chromosome)	ECA2242
AT1110	PectobacteriumatrosepticumSCRI1043(chromosome)	ECA2513
AT1111	PectobacteriumatrosepticumSCRI1043(chromosome)	ECA2757
AT1112	PectobacteriumatrosepticumSCRI1043(chromosome)	ECA2804
AT1113	PectobacteriumatrosepticumSCRI1043(chromosome)	ECA2851
AT1114	PectobacteriumatrosepticumSCRI1043(chromosome)	ECA3687
AT1115	PectobacteriumatrosepticumSCRI1043(chromosome)	ECA4154
AT776	XylellafastidiosaTemecula1(chromosome)	PD0369
AT777	XylellafastidiosaTemecula1(chromosome)	PD0371
AT778	XylellafastidiosaTemecula1(chromosome)	PD0961
AT779	XylellafastidiosaTemecula1(chromosome)	PD0968
AT780	XylellafastidiosaTemecula1(chromosome)	PD0983
AT781	XylellafastidiosaTemecula1(chromosome)	PD0997
AT782	XylellafastidiosaTemecula1(chromosome)	PD1099
AT783	XylellafastidiosaTemecula1(chromosome)	PD1177
AT784	XylellafastidiosaTemecula1(chromosome)	PD1183
AT785	XylellafastidiosaTemecula1(chromosome)	PD1341
AT786	XylellafastidiosaTemecula1(chromosome)	PD1342
AT787	XylellafastidiosaTemecula1(chromosome)	PD1717
AT693	ClostridiumtetaniE88(chromosome)	CTC01070
AT694	ClostridiumtetaniE88(chromosome)	CTC01416
AT695	ClostridiumtetaniE88(chromosome)	CTC01858
AT696	LactobacillusplantarumWCFS1(chromosome)	lp_0431
AT697	LactobacillusplantarumWCFS1(chromosome)	lp_0631
AT698	LactobacillusplantarumWCFS1(chromosome)	lp_2448
AT699	LactobacillusplantarumWCFS1(chromosome)	lp_2883
AT700	LactobacillusplantarumWCFS1(chromosome)	lp_3389
AT701	LactobacillusplantarumWCFS1(chromosome)	lp_3478
AT1050	Pseudomonassyringaepv.tomatostr.DC3000(chromosome)	PSPTO_0214
AT1051	Pseudomonassyringaepv.tomatostr.DC3000(chromosome)	PSPTO_0240
AT1052	Pseudomonassyringaepv.tomatostr.DC3000(chromosome)	PSPTO_0337
AT1053	Pseudomonassyringaepv.tomatostr.DC3000(chromosome)	PSPTO_0422
AT1054	Pseudomonassyringaepv.tomatostr.DC3000(chromosome)	PSPTO_0521
AT1055	Pseudomonassyringaepv.tomatostr.DC3000(chromosome)	PSPTO_0720
AT1056	Pseudomonassyringaepv.tomatostr.DC3000(chromosome)	PSPTO_0930
AT1057	Pseudomonassyringaepv.tomatostr.DC3000(chromosome)	PSPTO_1038
AT1058	Pseudomonassyringaepv.tomatostr.DC3000(chromosome)	PSPTO_1046
AT1059	Pseudomonassyringaepv.tomatostr.DC3000(chromosome)	PSPTO_1058
AT1060	Pseudomonassyringaepv.tomatostr.DC3000(chromosome)	PSPTO_1635
AT1061	Pseudomonassyringaepv.tomatostr.DC3000(chromosome)	PSPTO_2000
AT1062	Pseudomonassyringaepv.tomatostr.DC3000(chromosome)	PSPTO_3676
AT1063	Pseudomonassyringaepv.tomatostr.DC3000(chromosome)	PSPTO_5375
AT1064	Pseudomonassyringaepv.tomatostr.DC3000(chromosome)	PSPTO_5388
AT702	VibrioparahaemolyticusRIMD2210633(chromosome)	VP0403
AT703	VibrioparahaemolyticusRIMD2210633(chromosome)	VP1821
AT704	VibrioparahaemolyticusRIMD2210633(chromosome)	VP1829
AT705	VibrioparahaemolyticusRIMD2210633(chromosome)	VP1842
AT706	VibrioparahaemolyticusRIMD2210633(chromosome)	VP1885
AT707	VibrioparahaemolyticusRIMD2210633(chromosome)	VP1886
AT6102	VibrioparahaemolyticusRIMD2210633(chromosome)	VP1842
AT708	StreptococcuspyogenesSSI-1(chromosome)	SPs0411
AT709	StreptococcuspyogenesSSI-1(chromosome)	SPs0514
AT710	StreptococcuspyogenesSSI-1(chromosome)	SPs0600
AT711	StreptococcuspyogenesSSI-1(chromosome)	SPs1162
AT712	StreptococcuspyogenesSSI-1(chromosome)	SPs1168
AT713	StreptococcuspyogenesSSI-1(chromosome)	SPs1461
AT714	StreptococcuspyogenesSSI-1(chromosome)	SPs1659
AT749	Salmonellaentericasubsp.entericaserovarTyphistr.Ty2	t1910
AT750	Salmonellaentericasubsp.entericaserovarTyphistr.Ty2	t2804
AT751	Salmonellaentericasubsp.entericaserovarTyphistr.Ty2	t2944
AT752	Salmonellaentericasubsp.entericaserovarTyphistr.Ty2	t3391
AT753	Salmonellaentericasubsp.entericaserovarTyphistr.Ty2	t3588
AT754	Salmonellaentericasubsp.entericaserovarTyphistr.Ty2	t3591
AT755	Salmonellaentericasubsp.entericaserovarTyphistr.Ty2	t3867
AT756	Salmonellaentericasubsp.entericaserovarTyphistr.Ty2	t4034
AT757	Salmonellaentericasubsp.entericaserovarTyphistr.Ty2	t4223
AT758	Salmonellaentericasubsp.entericaserovarTyphistr.Ty2	t4358
AT759	Salmonellaentericasubsp.entericaserovarTyphistr.Ty2	t4483
AT760	Salmonellaentericasubsp.entericaserovarTyphistr.Ty2	t4579
AT1794	Pseudomonassyringaepv.tomatostr.DC3000(plasmidpDC3000B)	PSPTO_B0019
AT1795	Pseudomonassyringaepv.tomatostr.DC3000(plasmidpDC3000B)	PSPTO_B0026
AT1796	Pseudomonassyringaepv.tomatostr.DC3000(plasmidpDC3000B)	PSPTO_B0074
AT1797	Pseudomonassyringaepv.tomatostr.DC3000(plasmidpDC3000A)	PSPTOA0058
AT715	BacteroidesthetaiotaomicronVPI-5482(chromosome)	BT_0167
AT716	BacteroidesthetaiotaomicronVPI-5482(chromosome)	BT_2210
AT717	BacteroidesthetaiotaomicronVPI-5482(chromosome)	BT_4529
AT718	BacteroidesthetaiotaomicronVPI-5482(chromosome)	BT_4733
AT1020	EnterococcusfaecalisV583(chromosome)	EF0129
AT1021	EnterococcusfaecalisV583(chromosome)	EF0138
AT1022	EnterococcusfaecalisV583(chromosome)	EF0306
AT1023	EnterococcusfaecalisV583(chromosome)	EF0380
AT1024	EnterococcusfaecalisV583(chromosome)	EF0512
AT1025	EnterococcusfaecalisV583(chromosome)	EF1277
AT1026	EnterococcusfaecalisV583(chromosome)	EF1422
AT1027	EnterococcusfaecalisV583(chromosome)	EF2040
AT1028	EnterococcusfaecalisV583(chromosome)	EF2142
AT1029	EnterococcusfaecalisV583(chromosome)	EF2534
AT1030	EnterococcusfaecalisV583(chromosome)	EF2544
AT1031	EnterococcusfaecalisV583(chromosome)	EF2852
AT1032	EnterococcusfaecalisV583(chromosome)	EF3261
AT1798	EnterococcusfaecalisV583(plasmidpTEF1)	EFA0065
AT1799	EnterococcusfaecalisV583(plasmidpTEF1)	EFA0072
AT1800	CoxiellaburnetiiRSA493(plasmidpQpH1)	CBUA0027
AT719	BacilluscereusATCC14579(chromosome)	BC0265
AT720	BacilluscereusATCC14579(chromosome)	BC3703
AT721	BacilluscereusATCC14579(chromosome)	BC4708
AT6297	BacilluscereusATCC14579(chromosome)	BC2437
AT1729	Acidithiobacilluscaldus(plasmidpTC-F14)	pTC-F14_p07
AT722	Shigellaflexneri2astr.2457T(chromosome)	S0373
AT723	Shigellaflexneri2astr.2457T(chromosome)	S1670
AT724	Shigellaflexneri2astr.2457T(chromosome)	S3329
AT725	Shigellaflexneri2astr.2457T(chromosome)	S4382
AT890	NitrosomonaseuropaeaATCC19718(chromosome)	NE0262
AT891	NitrosomonaseuropaeaATCC19718(chromosome)	NE0263
AT892	NitrosomonaseuropaeaATCC19718(chromosome)	NE0293
AT893	NitrosomonaseuropaeaATCC19718(chromosome)	NE0289
AT894	NitrosomonaseuropaeaATCC19718(chromosome)	NE0475
AT895	NitrosomonaseuropaeaATCC19718(chromosome)	NE0478
AT896	NitrosomonaseuropaeaATCC19718(chromosome)	NE0481
AT897	NitrosomonaseuropaeaATCC19718(chromosome)	NE0490
AT898	NitrosomonaseuropaeaATCC19718(chromosome)	NE0497
AT899	NitrosomonaseuropaeaATCC19718(chromosome)	NE0551
AT900	NitrosomonaseuropaeaATCC19718(chromosome)	NE0703
AT901	NitrosomonaseuropaeaATCC19718(chromosome)	NE0712
AT902	NitrosomonaseuropaeaATCC19718(chromosome)	NE0822
AT903	NitrosomonaseuropaeaATCC19718(chromosome)	NE0975
AT904	NitrosomonaseuropaeaATCC19718(chromosome)	NE1065
AT905	NitrosomonaseuropaeaATCC19718(chromosome)	NE1066
AT906	NitrosomonaseuropaeaATCC19718(chromosome)	NE1074
AT907	NitrosomonaseuropaeaATCC19718(chromosome)	NE1077
AT908	NitrosomonaseuropaeaATCC19718(chromosome)	NE1091
AT909	NitrosomonaseuropaeaATCC19718(chromosome)	NE1104
AT910	NitrosomonaseuropaeaATCC19718(chromosome)	NE1110
AT911	NitrosomonaseuropaeaATCC19718(chromosome)	NE1182
AT912	NitrosomonaseuropaeaATCC19718(chromosome)	NE1224
AT913	NitrosomonaseuropaeaATCC19718(chromosome)	NE1304
AT914	NitrosomonaseuropaeaATCC19718(chromosome)	NE1307
AT915	NitrosomonaseuropaeaATCC19718(chromosome)	NE1311
AT916	NitrosomonaseuropaeaATCC19718(chromosome)	NE1346
AT917	NitrosomonaseuropaeaATCC19718(chromosome)	NE1350
AT919	NitrosomonaseuropaeaATCC19718(chromosome)	NE1355
AT920	NitrosomonaseuropaeaATCC19718(chromosome)	NE1372
AT921	NitrosomonaseuropaeaATCC19718(chromosome)	NE1374
AT922	NitrosomonaseuropaeaATCC19718(chromosome)	NE1376
AT923	NitrosomonaseuropaeaATCC19718(chromosome)	NE1524
AT924	NitrosomonaseuropaeaATCC19718(chromosome)	NE1534
AT925	NitrosomonaseuropaeaATCC19718(chromosome)	NE1562
AT926	NitrosomonaseuropaeaATCC19718(chromosome)	NE1578
AT927	NitrosomonaseuropaeaATCC19718(chromosome)	NE1580
AT928	NitrosomonaseuropaeaATCC19718(chromosome)	NE1582
AT929	NitrosomonaseuropaeaATCC19718(chromosome)	NE1583
AT930	NitrosomonaseuropaeaATCC19718(chromosome)	NE1587
AT931	NitrosomonaseuropaeaATCC19718(chromosome)	NE1590
AT932	NitrosomonaseuropaeaATCC19718(chromosome)	NE1592
AT933	NitrosomonaseuropaeaATCC19718(chromosome)	NE1598
AT934	NitrosomonaseuropaeaATCC19718(chromosome)	NE1998
AT935	NitrosomonaseuropaeaATCC19718(chromosome)	NE2103
AT936	NitrosomonaseuropaeaATCC19718(chromosome)	NE2106
AT937	NitrosomonaseuropaeaATCC19718(chromosome)	NE2111
AT938	NitrosomonaseuropaeaATCC19718(chromosome)	NE2115
AT939	NitrosomonaseuropaeaATCC19718(chromosome)	NE2175
AT940	NitrosomonaseuropaeaATCC19718(chromosome)	NE2225
AT941	NitrosomonaseuropaeaATCC19718(chromosome)	NE2537
AT1801	YersiniapestisKIM10+(plasmidpMT-1)	Y1075
AT1347	HelicobacterhepaticusATCC51449(chromosome)	HH0273
AT1802	Aeromonassalmonicidasubsp.salmonicidaA449(plasmidpAsa1)	ASA_pAsa101
AT6022	Enterococcusfaecium(plasmidpRUM)	pRUM_p07
AT1033	RhodopirellulabalticaSH1(chromosome)	RB3259
AT1034	RhodopirellulabalticaSH1(chromosome)	RB4026
AT1035	RhodopirellulabalticaSH1(chromosome)	RB4642
AT1036	RhodopirellulabalticaSH1(chromosome)	RB10184
AT1037	RhodopirellulabalticaSH1(chromosome)	RB11366
AT1263	Synechococcussp.WH8102(chromosome)	SYNW0072
AT1264	Synechococcussp.WH8102(chromosome)	SYNW0215
AT1265	Synechococcussp.WH8102(chromosome)	SYNW0465
AT1266	Synechococcussp.WH8102(chromosome)	SYNW0467
AT1267	Synechococcussp.WH8102(chromosome)	SYNW0469
AT1268	Synechococcussp.WH8102(chromosome)	SYNW0473
AT1269	Synechococcussp.WH8102(chromosome)	SYNW0480
AT1270	Synechococcussp.WH8102(chromosome)	SYNW0570
AT1271	Synechococcussp.WH8102(chromosome)	SYNW0572
AT1272	Synechococcussp.WH8102(chromosome)	SYNW0576
AT1273	Synechococcussp.WH8102(chromosome)	SYNW0579
AT1274	Synechococcussp.WH8102(chromosome)	SYNW2380
AT1803	ChromobacteriumviolaceumATCC12472(chromosome)	CV_0035
AT1408	GloeobacterviolaceusPCC7421(chromosome)	gsr0095
AT1409	GloeobacterviolaceusPCC7421(chromosome)	gsr0125
AT1410	GloeobacterviolaceusPCC7421(chromosome)	gsl0168
AT1411	GloeobacterviolaceusPCC7421(chromosome)	gsr0247
AT1412	GloeobacterviolaceusPCC7421(chromosome)	gsr0278
AT1413	GloeobacterviolaceusPCC7421(chromosome)	gsr0356
AT1414	GloeobacterviolaceusPCC7421(chromosome)	gsr0615
AT1415	GloeobacterviolaceusPCC7421(chromosome)	gsr0630
AT1416	GloeobacterviolaceusPCC7421(chromosome)	gsl0633
AT1417	GloeobacterviolaceusPCC7421(chromosome)	gsl0722
AT1418	GloeobacterviolaceusPCC7421(chromosome)	gsl0845
AT1419	GloeobacterviolaceusPCC7421(chromosome)	glr0978
AT1420	GloeobacterviolaceusPCC7421(chromosome)	gsl1111
AT1421	GloeobacterviolaceusPCC7421(chromosome)	gsr1125
AT1422	GloeobacterviolaceusPCC7421(chromosome)	glr1165
AT1423	GloeobacterviolaceusPCC7421(chromosome)	gsl1200
AT1424	GloeobacterviolaceusPCC7421(chromosome)	gll1213
AT1425	GloeobacterviolaceusPCC7421(chromosome)	gll1333
AT1426	GloeobacterviolaceusPCC7421(chromosome)	glr1425
AT1427	GloeobacterviolaceusPCC7421(chromosome)	gll1437
AT1428	GloeobacterviolaceusPCC7421(chromosome)	gsl1574
AT1429	GloeobacterviolaceusPCC7421(chromosome)	gll1628
AT1430	GloeobacterviolaceusPCC7421(chromosome)	gsr1677
AT1431	GloeobacterviolaceusPCC7421(chromosome)	gsl1680
AT1432	GloeobacterviolaceusPCC7421(chromosome)	gsr1690
AT1433	GloeobacterviolaceusPCC7421(chromosome)	gll1697
AT1434	GloeobacterviolaceusPCC7421(chromosome)	gsl1709
AT1435	GloeobacterviolaceusPCC7421(chromosome)	glr1722
AT1436	GloeobacterviolaceusPCC7421(chromosome)	gsl1825
AT1437	GloeobacterviolaceusPCC7421(chromosome)	gsl1911
AT1438	GloeobacterviolaceusPCC7421(chromosome)	gsl2025
AT1439	GloeobacterviolaceusPCC7421(chromosome)	gsr2076
AT1440	GloeobacterviolaceusPCC7421(chromosome)	gll2161
AT1441	GloeobacterviolaceusPCC7421(chromosome)	gsr2287
AT1442	GloeobacterviolaceusPCC7421(chromosome)	gll2292
AT1443	GloeobacterviolaceusPCC7421(chromosome)	gsl2301
AT1444	GloeobacterviolaceusPCC7421(chromosome)	gsr2381
AT1445	GloeobacterviolaceusPCC7421(chromosome)	gsr2395
AT1446	GloeobacterviolaceusPCC7421(chromosome)	gsl2430
AT1447	GloeobacterviolaceusPCC7421(chromosome)	gsr2431
AT1448	GloeobacterviolaceusPCC7421(chromosome)	glr2608
AT1449	GloeobacterviolaceusPCC7421(chromosome)	gsl2688
AT1450	GloeobacterviolaceusPCC7421(chromosome)	glr2724
AT1451	GloeobacterviolaceusPCC7421(chromosome)	gsr2734
AT1452	GloeobacterviolaceusPCC7421(chromosome)	gsl2900
AT1453	GloeobacterviolaceusPCC7421(chromosome)	gll2932
AT1454	GloeobacterviolaceusPCC7421(chromosome)	gll2956
AT1455	GloeobacterviolaceusPCC7421(chromosome)	gsl2983
AT1456	GloeobacterviolaceusPCC7421(chromosome)	glr3131
AT1457	GloeobacterviolaceusPCC7421(chromosome)	gsr3224
AT1458	GloeobacterviolaceusPCC7421(chromosome)	glr3254
AT1459	GloeobacterviolaceusPCC7421(chromosome)	gsr3474
AT1460	GloeobacterviolaceusPCC7421(chromosome)	gsr3504
AT1461	GloeobacterviolaceusPCC7421(chromosome)	gsl3523
AT1462	GloeobacterviolaceusPCC7421(chromosome)	gsr3527
AT1463	GloeobacterviolaceusPCC7421(chromosome)	gsl3556
AT1464	GloeobacterviolaceusPCC7421(chromosome)	gsl3799
AT1465	GloeobacterviolaceusPCC7421(chromosome)	gsr3874
AT1466	GloeobacterviolaceusPCC7421(chromosome)	gll3982
AT1467	GloeobacterviolaceusPCC7421(chromosome)	gsr3999
AT1468	GloeobacterviolaceusPCC7421(chromosome)	gsr4049
AT1469	GloeobacterviolaceusPCC7421(chromosome)	gsl4117
AT1470	GloeobacterviolaceusPCC7421(chromosome)	glr4239
AT1471	GloeobacterviolaceusPCC7421(chromosome)	gsr4342
AT1186	Photorhabdusluminescenssubsp.laumondiiTTO1(chromosome)	plu0180
AT1187	Photorhabdusluminescenssubsp.laumondiiTTO1(chromosome)	plu0206
AT1188	Photorhabdusluminescenssubsp.laumondiiTTO1(chromosome)	plu0252
AT1189	Photorhabdusluminescenssubsp.laumondiiTTO1(chromosome)	plu0254
AT1190	Photorhabdusluminescenssubsp.laumondiiTTO1(chromosome)	plu0283
AT1191	Photorhabdusluminescenssubsp.laumondiiTTO1(chromosome)	plu0443
AT1192	Photorhabdusluminescenssubsp.laumondiiTTO1(chromosome)	plu0624
AT1193	Photorhabdusluminescenssubsp.laumondiiTTO1(chromosome)	plu0646
AT1194	Photorhabdusluminescenssubsp.laumondiiTTO1(chromosome)	plu0706
AT1195	Photorhabdusluminescenssubsp.laumondiiTTO1(chromosome)	plu0861
AT1196	Photorhabdusluminescenssubsp.laumondiiTTO1(chromosome)	plu0865
AT1197	Photorhabdusluminescenssubsp.laumondiiTTO1(chromosome)	plu0895
AT1198	Photorhabdusluminescenssubsp.laumondiiTTO1(chromosome)	plu0928
AT1199	Photorhabdusluminescenssubsp.laumondiiTTO1(chromosome)	plu0959
AT1201	Photorhabdusluminescenssubsp.laumondiiTTO1(chromosome)	plu1064
AT1202	Photorhabdusluminescenssubsp.laumondiiTTO1(chromosome)	plu1223
AT1203	Photorhabdusluminescenssubsp.laumondiiTTO1(chromosome)	plu1325
AT1204	Photorhabdusluminescenssubsp.laumondiiTTO1(chromosome)	plu1617
AT1205	Photorhabdusluminescenssubsp.laumondiiTTO1(chromosome)	plu1812
AT1206	Photorhabdusluminescenssubsp.laumondiiTTO1(chromosome)	plu1931
AT1207	Photorhabdusluminescenssubsp.laumondiiTTO1(chromosome)	plu1973
AT1208	Photorhabdusluminescenssubsp.laumondiiTTO1(chromosome)	plu2051
AT1209	Photorhabdusluminescenssubsp.laumondiiTTO1(chromosome)	plu2098
AT1210	Photorhabdusluminescenssubsp.laumondiiTTO1(chromosome)	plu2104
AT1211	Photorhabdusluminescenssubsp.laumondiiTTO1(chromosome)	plu2127
AT1212	Photorhabdusluminescenssubsp.laumondiiTTO1(chromosome)	plu2131
AT1213	Photorhabdusluminescenssubsp.laumondiiTTO1(chromosome)	plu2154
AT1214	Photorhabdusluminescenssubsp.laumondiiTTO1(chromosome)	plu2211
AT1215	Photorhabdusluminescenssubsp.laumondiiTTO1(chromosome)	plu2250
AT1216	Photorhabdusluminescenssubsp.laumondiiTTO1(chromosome)	plu2254
AT1217	Photorhabdusluminescenssubsp.laumondiiTTO1(chromosome)	plu2265
AT1218	Photorhabdusluminescenssubsp.laumondiiTTO1(chromosome)	plu2270
AT1219	Photorhabdusluminescenssubsp.laumondiiTTO1(chromosome)	plu2278
AT1220	Photorhabdusluminescenssubsp.laumondiiTTO1(chromosome)	plu2305
AT1221	Photorhabdusluminescenssubsp.laumondiiTTO1(chromosome)	plu2309
AT1222	Photorhabdusluminescenssubsp.laumondiiTTO1(chromosome)	plu2357
AT1223	Photorhabdusluminescenssubsp.laumondiiTTO1(chromosome)	plu2366
AT1224	Photorhabdusluminescenssubsp.laumondiiTTO1(chromosome)	plu2369
AT1225	Photorhabdusluminescenssubsp.laumondiiTTO1(chromosome)	plu2371
AT1226	Photorhabdusluminescenssubsp.laumondiiTTO1(chromosome)	plu2422
AT1227	Photorhabdusluminescenssubsp.laumondiiTTO1(chromosome)	plu2538
AT1228	Photorhabdusluminescenssubsp.laumondiiTTO1(chromosome)	plu2536
AT1229	Photorhabdusluminescenssubsp.laumondiiTTO1(chromosome)	plu2651
AT1230	Photorhabdusluminescenssubsp.laumondiiTTO1(chromosome)	plu2705
AT1231	Photorhabdusluminescenssubsp.laumondiiTTO1(chromosome)	plu2846
AT1232	Photorhabdusluminescenssubsp.laumondiiTTO1(chromosome)	plu3003
AT1233	Photorhabdusluminescenssubsp.laumondiiTTO1(chromosome)	plu3058
AT1234	Photorhabdusluminescenssubsp.laumondiiTTO1(chromosome)	plu3315
AT1235	Photorhabdusluminescenssubsp.laumondiiTTO1(chromosome)	plu3491
AT1236	Photorhabdusluminescenssubsp.laumondiiTTO1(chromosome)	plu3889
AT1237	Photorhabdusluminescenssubsp.laumondiiTTO1(chromosome)	plu3943
AT1238	Photorhabdusluminescenssubsp.laumondiiTTO1(chromosome)	plu3959
AT1239	Photorhabdusluminescenssubsp.laumondiiTTO1(chromosome)	plu3982
AT1240	Photorhabdusluminescenssubsp.laumondiiTTO1(chromosome)	plu4195
AT1241	Photorhabdusluminescenssubsp.laumondiiTTO1(chromosome)	plu4283
AT1242	Photorhabdusluminescenssubsp.laumondiiTTO1(chromosome)	plu4295
AT1243	Photorhabdusluminescenssubsp.laumondiiTTO1(chromosome)	plu4354
AT1244	Photorhabdusluminescenssubsp.laumondiiTTO1(chromosome)	plu4365
AT1245	Photorhabdusluminescenssubsp.laumondiiTTO1(chromosome)	plu4466
AT1246	Photorhabdusluminescenssubsp.laumondiiTTO1(chromosome)	plu4593
AT1247	Photorhabdusluminescenssubsp.laumondiiTTO1(chromosome)	plu4634
AT1248	Photorhabdusluminescenssubsp.laumondiiTTO1(chromosome)	plu4779
AT1249	Photorhabdusluminescenssubsp.laumondiiTTO1(chromosome)	plu4782
AT1250	Photorhabdusluminescenssubsp.laumondiiTTO1(chromosome)	plu4784
AT1251	Photorhabdusluminescenssubsp.laumondiiTTO1(chromosome)	plu4901
AT1804	VibriovulnificusYJ016(plasmidpYJ016)	VVP66
AT1275	VibriovulnificusYJ016(chromosome)	VVA0313
AT1805	Synechocystissp.PCC6803(SynechocystisPCC6803)(plasmidpSYSM)	sll5004
AT1806	Synechocystissp.PCC6803(SynechocystisPCC6803)(plasmidpSYSM)	slr5018
AT1807	Synechocystissp.PCC6803(SynechocystisPCC6803)(plasmidpSYSM)	slr5021
AT1808	Synechocystissp.PCC6803(SynechocystisPCC6803)(plasmidpSYSM)	ssl5095
AT1809	Synechocystissp.PCC6803(SynechocystisPCC6803)(plasmidpSYSM)	ssr5117
AT1810	Synechocystissp.PCC6803(SynechocystisPCC6803)(plasmidpSYSA)	ssl7004
AT1811	Synechocystissp.PCC6803(SynechocystisPCC6803)(plasmidpSYSA)	sll7006
AT1812	Synechocystissp.PCC6803(SynechocystisPCC6803)(plasmidpSYSA)	sll7031
AT1813	Synechocystissp.PCC6803(SynechocystisPCC6803)(plasmidpSYSA)	sll7034
AT1814	Synechocystissp.PCC6803(SynechocystisPCC6803)(plasmidpSYSA)	ssl7038
AT1815	Synechocystissp.PCC6803(SynechocystisPCC6803)(plasmidpSYSA)	ssr7040
AT1816	Synechocystissp.PCC6803(SynechocystisPCC6803)(plasmidpSYSG)	ssl8008
AT1817	Synechocystissp.PCC6803(SynechocystisPCC6803)(plasmidpSYSG)	sll8012
AT1818	Synechocystissp.PCC6803(SynechocystisPCC6803)(plasmidpSYSG)	ssr8013
AT1819	Synechocystissp.PCC6803(SynechocystisPCC6803)(plasmidpSYSG)	ssl8028
AT1820	Synechocystissp.PCC6803(SynechocystisPCC6803)(plasmidpSYSX)	slr6056
AT1821	Synechocystissp.PCC6803(SynechocystisPCC6803)(plasmidpSYSX)	slr6101
AT1822	RalstoniaeutrophaH16(plasmidmegaplasmidpHG1)	PHG171
AT1823	RalstoniaeutrophaH16(plasmidmegaplasmidpHG1)	PHG193
AT1824	RalstoniaeutrophaH16(plasmidmegaplasmidpHG1)	PHG380
AT1475	RhodopseudomonaspalustrisCGA009(chromosome)	RPA0277
AT1476	RhodopseudomonaspalustrisCGA009(chromosome)	RPA0826
AT1477	RhodopseudomonaspalustrisCGA009(chromosome)	RPA0942
AT1478	RhodopseudomonaspalustrisCGA009(chromosome)	RPA1282
AT1479	RhodopseudomonaspalustrisCGA009(chromosome)	RPA1290
AT1480	RhodopseudomonaspalustrisCGA009(chromosome)	RPA1834
AT1481	RhodopseudomonaspalustrisCGA009(chromosome)	RPA1993
AT1482	RhodopseudomonaspalustrisCGA009(chromosome)	RPA2140
AT1483	RhodopseudomonaspalustrisCGA009(chromosome)	RPA2282
AT1484	RhodopseudomonaspalustrisCGA009(chromosome)	RPA2820
AT1485	RhodopseudomonaspalustrisCGA009(chromosome)	RPA3109
AT1486	RhodopseudomonaspalustrisCGA009(chromosome)	RPA3130
AT1487	RhodopseudomonaspalustrisCGA009(chromosome)	RPA3166
AT1488	RhodopseudomonaspalustrisCGA009(chromosome)	RPA3583
AT1489	RhodopseudomonaspalustrisCGA009(chromosome)	RPA3607
AT1490	RhodopseudomonaspalustrisCGA009(chromosome)	RPA3827
AT1491	RhodopseudomonaspalustrisCGA009(chromosome)	RPA4129
AT1492	RhodopseudomonaspalustrisCGA009(chromosome)	RPA4141
AT1723	LactobacillusjohnsoniiNCC533(chromosome)	LJ0294
AT1724	LactobacillusjohnsoniiNCC533(chromosome)	LJ0294b
AT1725	LactobacillusjohnsoniiNCC533(chromosome)	LJ1240
AT1726	LactobacillusjohnsoniiNCC533(chromosome)	LJ1456
AT1727	LactobacillusjohnsoniiNCC533(chromosome)	LJ1457
AT1728	LactobacillusjohnsoniiNCC533(chromosome)	LJ0588
AT1281	BdellovibriobacteriovorusHD100(chromosome)	Bd1294
AT1282	BdellovibriobacteriovorusHD100(chromosome)	Bd1706
AT1283	BdellovibriobacteriovorusHD100(chromosome)	Bd3666
AT1825	BacilluscereusATCC10987(plasmidpBc10987)	BCE_A0103
AT1826	Pseudomonassyringaepv.phaseolicola1448A(chromosome)	PSPPH_0159
AT1827	Pseudomonassyringaepv.phaseolicola1448A(chromosome)	PSPPH_0922
AT1828	Pseudomonassyringaepv.phaseolicola1448A(chromosome)	PSPPH_1543
AT1829	Pseudomonassyringaepv.phaseolicola1448A(chromosome)	PSPPH_1760
AT1830	Pseudomonassyringaepv.phaseolicola1448A(chromosome)	PSPPH_3342
AT1831	Pseudomonassyringaepv.phaseolicola1448A(chromosome)	PSPPH_4692
AT1178	MethanococcusmaripaludisS2(chromosome)	MMP0477
AT1179	MethanococcusmaripaludisS2(chromosome)	MMP0531
AT1395	YersiniapestisbiovarMicrotusstr.91001(chromosome)	YP_0317
AT1396	YersiniapestisbiovarMicrotusstr.91001(chromosome)	YP_0596
AT1397	YersiniapestisbiovarMicrotusstr.91001(chromosome)	YP_0598
AT1398	YersiniapestisbiovarMicrotusstr.91001(chromosome)	YP_1069
AT1399	YersiniapestisbiovarMicrotusstr.91001(chromosome)	YP_1509
AT1400	YersiniapestisbiovarMicrotusstr.91001(chromosome)	YP_1560
AT1401	YersiniapestisbiovarMicrotusstr.91001(chromosome)	YP_1576
AT1402	YersiniapestisbiovarMicrotusstr.91001(chromosome)	YP_2107
AT1403	YersiniapestisbiovarMicrotusstr.91001(chromosome)	YP_2132
AT1404	YersiniapestisbiovarMicrotusstr.91001(chromosome)	YP_3579
AT1405	YersiniapestisbiovarMicrotusstr.91001(chromosome)	YP_3581
AT1406	YersiniapestisbiovarMicrotusstr.91001(chromosome)	YP_3581
AT1407	YersiniapestisbiovarMicrotusstr.91001(chromosome)	YP_3738
AT1832	YersiniapestisbiovarMicrotusstr.91001(plasmidpPCP1)	YP_pPCP09
AT1514	LeptospirainterrogansserovarCopenhagenistr.FiocruzL1-130	LIC10867
AT1515	LeptospirainterrogansserovarCopenhagenistr.FiocruzL1-130	LIC11164
AT1516	LeptospirainterrogansserovarCopenhagenistr.FiocruzL1-130	LIC11192
AT1517	LeptospirainterrogansserovarCopenhagenistr.FiocruzL1-130	LIC12117
AT1518	LeptospirainterrogansserovarCopenhagenistr.FiocruzL1-130	LIC12659
AT1519	LeptospirainterrogansserovarCopenhagenistr.FiocruzL1-130	LIC12712
AT1520	LeptospirainterrogansserovarCopenhagenistr.FiocruzL1-130	LIC13408
AT1605	ThermusthermophilusHB27(chromosome)	TTC0114
AT1606	ThermusthermophilusHB27(chromosome)	TTC0126
AT1607	ThermusthermophilusHB27(chromosome)	TTC0267
AT1608	ThermusthermophilusHB27(chromosome)	TTC0270
AT1609	ThermusthermophilusHB27(chromosome)	TTC0798
AT1610	ThermusthermophilusHB27(chromosome)	TTC1208
AT1611	ThermusthermophilusHB27(chromosome)	TTC1284
AT1613	ThermusthermophilusHB27(chromosome)	TTC1394
AT1615	ThermusthermophilusHB27(chromosome)	TTC1548
AT1617	ThermusthermophilusHB27(chromosome)	TTC1704
AT1618	ThermusthermophilusHB27(chromosome)	TTC1805
AT1619	ThermusthermophilusHB27(chromosome)	TTC1958
AT1385	CandidatusProtochlamydiaamoebophilaUWE25(chromosome)	pc0989
AT1386	CandidatusProtochlamydiaamoebophilaUWE25(chromosome)	pc0996
AT1388	CandidatusProtochlamydiaamoebophilaUWE25(chromosome)	pc1018
AT1389	CandidatusProtochlamydiaamoebophilaUWE25(chromosome)	pc1022
AT1390	CandidatusProtochlamydiaamoebophilaUWE25(chromosome)	pc1443
AT1391	CandidatusProtochlamydiaamoebophilaUWE25(chromosome)	pc1457
AT1392	CandidatusProtochlamydiaamoebophilaUWE25(chromosome)	pc1473
AT1393	CandidatusProtochlamydiaamoebophilaUWE25(chromosome)	pc1913
AT1394	CandidatusProtochlamydiaamoebophilaUWE25(chromosome)	pc1922
AT1833	Desulfovibriovulgarisstr.Hildenborough(plasmidpDV)	DVUA0151
AT1834	PhotobacteriumprofundumSS9(plasmidpPBPR1)	PBPRC0062
AT1319	PicrophilustorridusDSM9790(chromosome)	PTO0277
AT1320	PicrophilustorridusDSM9790(chromosome)	PTO1513
AT1499	Bacillusanthracisstr.Sterne(chromosome)	BAS0239
AT1500	Bacillusanthracisstr.Sterne(chromosome)	BAS3544
AT1501	Bacillusanthracisstr.Sterne(chromosome)	BAS3545
AT1502	Bacillusanthracisstr.Sterne(chromosome)	BAS4606
AT1641	Bartonellahenselaestr.Houston-1(chromosome)	BH02910
AT1642	Bartonellahenselaestr.Houston-1(chromosome)	BH02970
AT1643	Bartonellahenselaestr.Houston-1(chromosome)	BH03220
AT1644	Bartonellahenselaestr.Houston-1(chromosome)	BH03380
AT1645	Bartonellahenselaestr.Houston-1(chromosome)	BH03400
AT1646	Bartonellahenselaestr.Houston-1(chromosome)	BH03510
AT1647	Bartonellahenselaestr.Houston-1(chromosome)	BH06620
AT1648	Bartonellahenselaestr.Houston-1(chromosome)	BH06820
AT1649	Bartonellahenselaestr.Houston-1(chromosome)	BH07020
AT1650	Bartonellahenselaestr.Houston-1(chromosome)	BH07050
AT1651	Bartonellahenselaestr.Houston-1(chromosome)	BH07070
AT1652	Bartonellahenselaestr.Houston-1(chromosome)	BH09490
AT1603	Bacillusthuringiensisserovarkonkukianstr.97-27(chromosome)	BT9727_0225
AT1604	Bacillusthuringiensisserovarkonkukianstr.97-27(chromosome)	BT9727_4442
AT1353	Acinetobactersp.ADP1(chromosome)	ACIAD1638
AT1354	Acinetobactersp.ADP1(chromosome)	ACIAD1802
AT1355	Acinetobactersp.ADP1(chromosome)	ACIAD2181
AT1356	Acinetobactersp.ADP1(chromosome)	ACIAD2378
AT1252	PropionibacteriumacnesKPA171202(chromosome)	PPA0655
AT1253	PropionibacteriumacnesKPA171202(chromosome)	PPA1450
AT1254	PropionibacteriumacnesKPA171202(chromosome)	PPA2075
AT1637	StreptococcuspyogenesMGAS10394(chromosome)	M6_Spy0023
AT1638	StreptococcuspyogenesMGAS10394(chromosome)	M6_Spy0488
AT1639	StreptococcuspyogenesMGAS10394(chromosome)	M6_Spy1649
AT1640	StreptococcuspyogenesMGAS10394(chromosome)	M6_Spy1807
AT1345	Leifsoniaxylisubsp.xylistr.CTCB07(chromosome)	Lxx22360
AT1346	Leifsoniaxylisubsp.xylistr.CTCB07(chromosome)	Lxx22678
AT1472	DesulfotaleapsychrophilaLSv54(chromosome)	DP0408
AT1473	DesulfotaleapsychrophilaLSv54(chromosome)	DP0409
AT1474	DesulfotaleapsychrophilaLSv54(chromosome)	DP2056
AT1835	DesulfotaleapsychrophilaLSv54(plasmidlarge)	DPPB46
AT1836	YersiniapseudotuberculosisIP32953(plasmidpYV)	pYV0027
AT1521	YersiniapseudotuberculosisIP32953(chromosome)	YPTB0487
AT1522	YersiniapseudotuberculosisIP32953(chromosome)	YPTB0489
AT1523	YersiniapseudotuberculosisIP32953(chromosome)	YPTB0588
AT1524	YersiniapseudotuberculosisIP32953(chromosome)	YPTB0762
AT1525	YersiniapseudotuberculosisIP32953(chromosome)	YPTB1902
AT1526	YersiniapseudotuberculosisIP32953(chromosome)	YPTB2239
AT1527	YersiniapseudotuberculosisIP32953(chromosome)	YPTB2263
AT1528	YersiniapseudotuberculosisIP32953(chromosome)	YPTB3123
AT1529	YersiniapseudotuberculosisIP32953(chromosome)	YPTB3125
AT1343	SymbiobacteriumthermophilumIAM14863(chromosome)	STH2149
AT1344	SymbiobacteriumthermophilumIAM14863(chromosome)	STH2935
AT1284	BacilluslicheniformisDSM13=ATCC14580(chromosome)	BL02805
AT1285	BacilluslicheniformisDSM13=ATCC14580(chromosome)	BL03748
AT1286	BacilluslicheniformisDSM13=ATCC14580(chromosome)	BL00645
AT1357	BacilluscereusE33L(chromosome)	BCZK0227
AT1358	BacilluscereusE33L(chromosome)	BCZK3458
AT1359	BacilluscereusE33L(chromosome)	BCZK3459
AT1360	BacilluscereusE33L(chromosome)	BCZK4460
AT1837	BacteroidesfragilisYCH46(plasmidpBFY46)	BFp0025
AT1262	MannheimiasucciniciproducensMBEL55E(chromosome)	MS1094
AT1300	BacteroidesfragilisYCH46(chromosome)	BF0397
AT1301	BacteroidesfragilisYCH46(chromosome)	BF0797
AT1302	BacteroidesfragilisYCH46(chromosome)	BF1147
AT1303	BacteroidesfragilisYCH46(chromosome)	BF2483
AT1304	BacteroidesfragilisYCH46(chromosome)	BF2945
AT1305	BacteroidesfragilisYCH46(chromosome)	BF3674
AT1306	BacteroidesfragilisYCH46(chromosome)	BF3686
AT1307	BacteroidesfragilisYCH46(chromosome)	BF4068
AT1838	BurkholderiamalleiATCC23344(chromosome)	BMA2019
AT6105	BurkholderiapseudomalleiK96243(chromosome)	BPSL0174
AT1546	BurkholderiapseudomalleiK96243(chromosome)	BPSS0391
AT1547	BurkholderiapseudomalleiK96243(chromosome)	BPSS0394
AT1548	BurkholderiapseudomalleiK96243(chromosome)	BPSS1061
AT1550	BurkholderiapseudomalleiK96243(chromosome)	BPSS1583
AT1551	BurkholderiapseudomalleiK96243(chromosome)	BPSS1816
AT1552	BurkholderiapseudomalleiK96243(chromosome)	BPSS1821
AT6106	BurkholderiapseudomalleiK96243(chromosome)	BPSS1059
AT6107	BurkholderiapseudomalleiK96243(chromosome)	BPSS0391
AT6108	BurkholderiapseudomalleiK96243(chromosome)	BPSS1583
AT1079	NocardiafarcinicaIFM10152(chromosome)	nfa3320
AT1080	NocardiafarcinicaIFM10152(chromosome)	nfa4160
AT1081	NocardiafarcinicaIFM10152(chromosome)	nfa4690
AT1082	NocardiafarcinicaIFM10152(chromosome)	nfa4940
AT1083	NocardiafarcinicaIFM10152(chromosome)	nfa7700
AT1084	NocardiafarcinicaIFM10152(chromosome)	nfa10030
AT1085	NocardiafarcinicaIFM10152(chromosome)	nfa19590
AT1086	NocardiafarcinicaIFM10152(chromosome)	nfa22980
AT1087	NocardiafarcinicaIFM10152(chromosome)	nfa23740
AT1088	NocardiafarcinicaIFM10152(chromosome)	nfa26020
AT1089	NocardiafarcinicaIFM10152(chromosome)	nfa30870
AT1090	NocardiafarcinicaIFM10152(chromosome)	nfa35500
AT1091	NocardiafarcinicaIFM10152(chromosome)	nfa37000
AT1092	NocardiafarcinicaIFM10152(chromosome)	nfa50950
AT1093	NocardiafarcinicaIFM10152(chromosome)	nfa53250
AT1094	NocardiafarcinicaIFM10152(chromosome)	nfa56110
AT1095	NocardiafarcinicaIFM10152(chromosome)	nfa56420
AT1839	Legionellapneumophilastr.Paris(plasmidpLPP)	plpp0090
AT1840	Legionellapneumophilastr.Paris(plasmidpLPP)	plpp0093
AT1841	Legionellapneumophilastr.Lens(plasmidpLPL)	plpl0034
AT1503	Legionellapneumophilastr.Lens(chromosome)	lpl0564
AT1504	Legionellapneumophilastr.Lens(chromosome)	lpl1093
AT1505	Legionellapneumophilastr.Lens(chromosome)	lpl1420
AT1506	Legionellapneumophilastr.Lens(chromosome)	lpl1587
AT1507	Legionellapneumophilastr.Lens(chromosome)	lpl1905
AT1508	Legionellapneumophilastr.Lens(chromosome)	lpl2290
AT1509	Legionellapneumophilastr.Lens(chromosome)	lpl2833
AT1510	Legionellapneumophilastr.Lens(chromosome)	lpl2847
AT1255	PhotobacteriumprofundumSS9(chromosome)	PBPRB0292
AT1256	PhotobacteriumprofundumSS9(chromosome)	PBPRB0419
AT1257	PhotobacteriumprofundumSS9(chromosome)	PBPRB0880
AT1258	PhotobacteriumprofundumSS9(chromosome)	PBPRB0955
AT1259	PhotobacteriumprofundumSS9(chromosome)	PBPRB1200
AT1260	PhotobacteriumprofundumSS9(chromosome)	PBPRB1292
AT1261	PhotobacteriumprofundumSS9(chromosome)	PBPRB1763
AT1540	HaloarculamarismortuiATCC43049(chromosome)	rrnAC0588
AT1541	HaloarculamarismortuiATCC43049(chromosome)	rrnAC1049
AT1542	HaloarculamarismortuiATCC43049(chromosome)	rrnAC1056
AT1543	HaloarculamarismortuiATCC43049(chromosome)	rrnAC1567
AT1544	HaloarculamarismortuiATCC43049(chromosome)	rrnAC1673
AT1545	HaloarculamarismortuiATCC43049(chromosome)	rrnAC3205
AT1096	StreptococcusthermophilusLMG18311(chromosome)	stu0916
AT1842	StreptococcusthermophilusCNRZ1066(chromosome)	str0916
AT1361	ThermusthermophilusHB8(chromosome)	TTHA0032
AT1362	ThermusthermophilusHB8(chromosome)	TTHA0048
AT1363	ThermusthermophilusHB8(chromosome)	TTHA0181
AT1364	ThermusthermophilusHB8(chromosome)	TTHA0427
AT1365	ThermusthermophilusHB8(chromosome)	TTHA0488
AT1366	ThermusthermophilusHB8(chromosome)	TTHA0498
AT1367	ThermusthermophilusHB8(chromosome)	TTHA0502
AT1368	ThermusthermophilusHB8(chromosome)	TTHA0633
AT1369	ThermusthermophilusHB8(chromosome)	TTHA0636
AT1370	ThermusthermophilusHB8(chromosome)	TTHA0640
AT1371	ThermusthermophilusHB8(chromosome)	TTHA0933
AT1373	ThermusthermophilusHB8(chromosome)	TTHA1051
AT1374	ThermusthermophilusHB8(chromosome)	TTHA1162
AT1375	ThermusthermophilusHB8(chromosome)	TTHA1201
AT1376	ThermusthermophilusHB8(chromosome)	TTHA1573
AT1377	ThermusthermophilusHB8(chromosome)	TTHA1648
AT1378	ThermusthermophilusHB8(chromosome)	TTHA1905
AT1380	ThermusthermophilusHB8(chromosome)	TTHA1912
AT1843	ThermusthermophilusHB8(plasmidpTT27)	TTHB006
AT1844	ThermusthermophilusHB8(plasmidpTT27)	TTHB008
AT1845	ThermusthermophilusHB8(plasmidpTT27)	TTHB063
AT1846	ThermusthermophilusHB8(plasmidpTT27)	TTHB107
AT1847	ThermusthermophilusHB8(plasmidpTT27)	TTHB136
AT1848	ThermusthermophilusHB8(plasmidpTT27)	TTHB168
AT1849	ThermusthermophilusHB8(plasmidpTT27)	TTHB204
AT1850	ThermusthermophilusHB8(plasmidpTT27)	TTHB234
AT1851	ThermusthermophilusHB8(plasmidpTT8)	TTHC012
AT1180	GeobacilluskaustophilusHTA426(chromosome)	GK0232
AT1181	GeobacilluskaustophilusHTA426(chromosome)	GK1647
AT1182	GeobacilluskaustophilusHTA426(chromosome)	GK1845
AT1183	GeobacilluskaustophilusHTA426(chromosome)	GK1950
AT1184	GeobacilluskaustophilusHTA426(chromosome)	GK2355
AT1185	GeobacilluskaustophilusHTA426(chromosome)	GK3105
AT1653	Salmonellaentericasubsp.entericaserovarParatyphiAstr.ATCC	SPA2760
AT1654	Salmonellaentericasubsp.entericaserovarParatyphiAstr.ATCC	SPA2902
AT1655	Salmonellaentericasubsp.entericaserovarParatyphiAstr.ATCC	SPA3337
AT1656	Salmonellaentericasubsp.entericaserovarParatyphiAstr.ATCC	SPA3504
AT1657	Salmonellaentericasubsp.entericaserovarParatyphiAstr.ATCC	SPA3746
AT1658	Salmonellaentericasubsp.entericaserovarParatyphiAstr.ATCC	SPA3871
AT1659	Salmonellaentericasubsp.entericaserovarParatyphiAstr.ATCC	SPA3874
AT1660	Salmonellaentericasubsp.entericaserovarParatyphiAstr.ATCC	SPA4134
AT1661	Salmonellaentericasubsp.entericaserovarParatyphiAstr.ATCC	SPA4249
AT1662	Salmonellaentericasubsp.entericaserovarParatyphiAstr.ATCC	SPA4350
AT1308	IdiomarinaloihiensisL2TR(chromosome)	IL0058
AT1309	IdiomarinaloihiensisL2TR(chromosome)	IL0285
AT1310	IdiomarinaloihiensisL2TR(chromosome)	IL0302
AT1311	IdiomarinaloihiensisL2TR(chromosome)	IL0592
AT1312	IdiomarinaloihiensisL2TR(chromosome)	IL0912
AT1313	IdiomarinaloihiensisL2TR(chromosome)	IL1162
AT1314	IdiomarinaloihiensisL2TR(chromosome)	IL1290
AT1315	IdiomarinaloihiensisL2TR(chromosome)	IL2056
AT1316	IdiomarinaloihiensisL2TR(chromosome)	IL2084
AT1317	IdiomarinaloihiensisL2TR(chromosome)	IL2516
AT1318	IdiomarinaloihiensisL2TR(chromosome)	IL2521
AT1852	LactobacillussalivariusUCC118(plasmidpSF118-20)	pSF118-20_25
AT1853	LactobacillussalivariusUCC118(plasmidpSF118-44)	LSL_1994
AT1854	LactobacillussalivariusUCC118(plasmidpSF118-44)	LSL_1997
AT1855	Francisellatularensissubsp.tularensisSCHUS4(chromosome)	FTT_1075
AT1627	SynechococcuselongatusPCC6301(SynechococcusleopoliensisSAG)(chromosome)	syc0003_d
AT1628	SynechococcuselongatusPCC6301(SynechococcusleopoliensisSAG)(chromosome)	syc0342_d
AT1629	SynechococcuselongatusPCC6301(SynechococcusleopoliensisSAG)(chromosome)	syc0346_d
AT1631	SynechococcuselongatusPCC6301(SynechococcusleopoliensisSAG)(chromosome)	syc0669_d
AT1632	SynechococcuselongatusPCC6301(SynechococcusleopoliensisSAG)(chromosome)	syc0980_c
AT1633	SynechococcuselongatusPCC6301(SynechococcusleopoliensisSAG)(chromosome)	syc0988_d
AT1634	SynechococcuselongatusPCC6301(SynechococcusleopoliensisSAG)(chromosome)	syc1025_d
AT1635	SynechococcuselongatusPCC6301(SynechococcusleopoliensisSAG)(chromosome)	syc1238_c
AT1636	SynechococcuselongatusPCC6301(SynechococcusleopoliensisSAG)(chromosome)	syc1465_d
AT1116	BacillusclausiiKSM-K16(chromosome)	ABC0808
AT1117	BacillusclausiiKSM-K16(chromosome)	ABC0848
AT1118	BacillusclausiiKSM-K16(chromosome)	ABC1016
AT1119	BacillusclausiiKSM-K16(chromosome)	ABC1359
AT1120	BacillusclausiiKSM-K16(chromosome)	ABC2856
AT1553	ThermococcuskodakarensisKOD1(chromosome)	TK2305
AT1554	ThermococcuskodakarensisKOD1(chromosome)	TK0017
AT1555	ThermococcuskodakarensisKOD1(chromosome)	TK0064
AT1556	ThermococcuskodakarensisKOD1(chromosome)	TK0065
AT1557	ThermococcuskodakarensisKOD1(chromosome)	TK0127
AT1558	ThermococcuskodakarensisKOD1(chromosome)	TK0138
AT1559	ThermococcuskodakarensisKOD1(chromosome)	TK0177
AT1560	ThermococcuskodakarensisKOD1(chromosome)	TK0192
AT1561	ThermococcuskodakarensisKOD1(chromosome)	TK0213
AT1562	ThermococcuskodakarensisKOD1(chromosome)	TK0221
AT1563	ThermococcuskodakarensisKOD1(chromosome)	TK0335
AT1564	ThermococcuskodakarensisKOD1(chromosome)	TK0340
AT1565	ThermococcuskodakarensisKOD1(chromosome)	TK0344
AT1566	ThermococcuskodakarensisKOD1(chromosome)	TK0372
AT1567	ThermococcuskodakarensisKOD1(chromosome)	TK0373
AT1568	ThermococcuskodakarensisKOD1(chromosome)	TK0457
AT1569	ThermococcuskodakarensisKOD1(chromosome)	TK0543
AT1570	ThermococcuskodakarensisKOD1(chromosome)	TK0695
AT1571	ThermococcuskodakarensisKOD1(chromosome)	TK0733
AT1572	ThermococcuskodakarensisKOD1(chromosome)	TK0792
AT1573	ThermococcuskodakarensisKOD1(chromosome)	TK0888
AT1574	ThermococcuskodakarensisKOD1(chromosome)	TK0909
AT1575	ThermococcuskodakarensisKOD1(chromosome)	TK0917
AT1576	ThermococcuskodakarensisKOD1(chromosome)	TK0963
AT1577	ThermococcuskodakarensisKOD1(chromosome)	TK0966
AT1578	ThermococcuskodakarensisKOD1(chromosome)	TK0973
AT1579	ThermococcuskodakarensisKOD1(chromosome)	TK0997
AT1580	ThermococcuskodakarensisKOD1(chromosome)	TK1013
AT1581	ThermococcuskodakarensisKOD1(chromosome)	TK1028
AT1582	ThermococcuskodakarensisKOD1(chromosome)	TK1068
AT1583	ThermococcuskodakarensisKOD1(chromosome)	TK1072
AT1584	ThermococcuskodakarensisKOD1(chromosome)	TK1076
AT1585	ThermococcuskodakarensisKOD1(chromosome)	TK1127
AT1586	ThermococcuskodakarensisKOD1(chromosome)	TK1184
AT1587	ThermococcuskodakarensisKOD1(chromosome)	TK1255
AT1588	ThermococcuskodakarensisKOD1(chromosome)	TK1291
AT1589	ThermococcuskodakarensisKOD1(chromosome)	TK1475
AT1590	ThermococcuskodakarensisKOD1(chromosome)	TK1511
AT1592	ThermococcuskodakarensisKOD1(chromosome)	TK1645
AT1593	ThermococcuskodakarensisKOD1(chromosome)	TK1710
AT1594	ThermococcuskodakarensisKOD1(chromosome)	TK1752
AT1595	ThermococcuskodakarensisKOD1(chromosome)	TK1762
AT1596	ThermococcuskodakarensisKOD1(chromosome)	TK1815
AT1597	ThermococcuskodakarensisKOD1(chromosome)	TK1996
AT1598	ThermococcuskodakarensisKOD1(chromosome)	TK2006
AT1599	ThermococcuskodakarensisKOD1(chromosome)	TK2068
AT1600	ThermococcuskodakarensisKOD1(chromosome)	TK2154
AT1601	ThermococcuskodakarensisKOD1(chromosome)	TK2229
AT1602	ThermococcuskodakarensisKOD1(chromosome)	TK2261
AT1856	Gluconobacteroxydans621H(plasmidpGOX1)	GOX2553
AT1857	Gluconobacteroxydans621H(plasmidpGOX1)	GOX2565
AT1858	Gluconobacteroxydans621H(plasmidpGOX2)	GOX2681
AT1859	Gluconobacteroxydans621H(plasmidpGOX3)	GOX2707
AT1351	Gluconobacteroxydans621H(chromosome)	GOX1500
AT1352	Gluconobacteroxydans621H(chromosome)	GOX2471
AT1668	LactobacillusacidophilusNCFM(chromosome)	LBA0030
AT1669	LactobacillusacidophilusNCFM(chromosome)	LBA1371
AT1670	LactobacillusacidophilusNCFM(chromosome)	LBA1403
AT1671	LactobacillusacidophilusNCFM(chromosome)	LBA1406
AT1860	AromatoleumaromaticumEbN1(plasmid1)	p1B137
AT1861	AromatoleumaromaticumEbN1(plasmid1)	p1B245
AT1620	XanthomonasoryzaeKACC10331(chromosome)	XOO0164
AT1621	XanthomonasoryzaeKACC10331(chromosome)	XOO2864
AT1622	XanthomonasoryzaeKACC10331(chromosome)	XOO3443
AT1623	XanthomonasoryzaeKACC10331(chromosome)	XOO3460
AT1624	XanthomonasoryzaeKACC10331(chromosome)	YXOOp02
AT1625	XanthomonasoryzaeKACC10331(chromosome)	XOO4467
AT1626	XanthomonasoryzaeKACC10331(chromosome)	XOO4506
AT1862	VibriofischeriES114(chromosome)	VF_1469
AT1863	Salmonellaentericasubsp.entericaserovarCholeraesuisstr.(plasmidpSCV50)	SCV18
AT1864	Salmonellaentericasubsp.entericaserovarCholeraesuisstr.(plasmidpSC138)	SC165
AT1865	Brucellaabortusbv.1str.9-941(chromosome)	BruAb1_0263
AT1866	Brucellaabortusbv.1str.9-941(chromosome)	BruAb1_0431
AT1867	Brucellaabortusbv.1str.9-941(chromosome)	BruAb1_0580
AT1868	Brucellaabortusbv.1str.9-941(chromosome)	BruAb1_0980
AT6024	Streptococcuspyogenes(plasmidpSM19035)	pSM19035_008
AT6079	Streptococcuspyogenes(plasmidpSM19035)	pSM19035_013
AT6158	Streptococcuspyogenes(plasmidpSM19035)	pSM19035_012
AT1869	Pseudomonassyringaepv.syringaeB728a(chromosome)	Psyr_0885
AT1870	Pseudomonassyringaepv.syringaeB728a(chromosome)	Psyr_0889
AT1871	Pseudomonassyringaepv.syringaeB728a(chromosome)	Psyr_0895
AT1872	Pseudomonassyringaepv.syringaeB728a(chromosome)	Psyr_2925
AT1873	Pseudomonassyringaepv.syringaeB728a(chromosome)	Psyr_3417
AT1874	Pseudomonassyringaepv.syringaeB728a(chromosome)	Psyr_3832
AT1875	Pseudomonassyringaepv.syringaeB728a(chromosome)	Psyr_4645
AT6032	Pseudomonassyringaepv.syringaeB728a(chromosome)	Psyr_3805
AT1876	Xanthomonascampestrispv.campestrisstr.8004(chromosome)	XC_0258
AT1877	Xanthomonascampestrispv.campestrisstr.8004(chromosome)	XC_1052
AT1878	Xanthomonascampestrispv.campestrisstr.8004(chromosome)	XC_1065
AT1879	Xanthomonascampestrispv.campestrisstr.8004(chromosome)	XC_2328
AT1880	Xanthomonascampestrispv.campestrisstr.8004(chromosome)	XC_2600
AT1881	Xanthomonascampestrispv.campestrisstr.8004(chromosome)	XC_3186
AT1882	Xanthomonascampestrispv.campestrisstr.8004(chromosome)	XC_3212
AT1883	Xanthomonascampestrispv.campestrisstr.8004(chromosome)	XC_3520
AT1884	BacilluscereusE33L(plasmidpE33L466)	pE33L466_0270
AT1885	RickettsiafelisURRWXCal2(chromosome)	RF_0015
AT1886	RickettsiafelisURRWXCal2(chromosome)	RF_0094
AT1887	RickettsiafelisURRWXCal2(chromosome)	RF_0169
AT1888	RickettsiafelisURRWXCal2(chromosome)	RF_0216
AT1889	RickettsiafelisURRWXCal2(chromosome)	RF_0272
AT1890	RickettsiafelisURRWXCal2(chromosome)	RF_0311
AT1891	RickettsiafelisURRWXCal2(chromosome)	RF_0335
AT1892	RickettsiafelisURRWXCal2(chromosome)	RF_0357
AT1893	RickettsiafelisURRWXCal2(chromosome)	RF_0457
AT1894	RickettsiafelisURRWXCal2(chromosome)	RF_0489
AT1895	RickettsiafelisURRWXCal2(chromosome)	RF_0601
AT1896	RickettsiafelisURRWXCal2(chromosome)	RF_0702
AT1897	RickettsiafelisURRWXCal2(chromosome)	RF_0731
AT1898	RickettsiafelisURRWXCal2(chromosome)	RF_0753
AT1899	RickettsiafelisURRWXCal2(chromosome)	RF_0788
AT1900	RickettsiafelisURRWXCal2(chromosome)	RF_0899
AT1901	RickettsiafelisURRWXCal2(chromosome)	RF_0910
AT1902	RickettsiafelisURRWXCal2(chromosome)	RF_0957
AT1903	RickettsiafelisURRWXCal2(chromosome)	RF_1207
AT1904	RickettsiafelisURRWXCal2(chromosome)	RF_1273
AT1905	RickettsiafelisURRWXCal2(chromosome)	RF_1279
AT1906	RickettsiafelisURRWXCal2(chromosome)	RF_1287
AT1907	RickettsiafelisURRWXCal2(chromosome)	RF_1316
AT1908	RickettsiafelisURRWXCal2(chromosome)	RF_1342
AT1909	RickettsiafelisURRWXCal2(chromosome)	RF_1369
AT1910	Haemophilusinfluenzae86-028NP(chromosome)	NTHI0087
AT1911	Haemophilusinfluenzae86-028NP(chromosome)	NTHI0439
AT1912	Haemophilusinfluenzae86-028NP(chromosome)	NTHI0780
AT1913	Haemophilusinfluenzae86-028NP(chromosome)	NTHI0788
AT1914	Haemophilusinfluenzae86-028NP(chromosome)	NTHI0838
AT1915	Haemophilusinfluenzae86-028NP(chromosome)	NTHI1121
AT1916	Haemophilusinfluenzae86-028NP(chromosome)	NTHI1427
AT1917	Haemophilusinfluenzae86-028NP(chromosome)	NTHI1912
AT6124	Haemophilusinfluenzae86-028NP(chromosome)	NTHI1912
AT1918	StaphylococcushaemolyticusJCSC1435(chromosome)	SH0962
AT1919	StaphylococcushaemolyticusJCSC1435(chromosome)	SH1804
AT1920	StaphylococcushaemolyticusJCSC1435(chromosome)	SH1805
AT1921	SulfolobusacidocaldariusDSM639(chromosome)	Saci_0468
AT1922	SulfolobusacidocaldariusDSM639(chromosome)	Saci_1791
AT1923	SulfolobusacidocaldariusDSM639(chromosome)	Saci_1812
AT1924	SulfolobusacidocaldariusDSM639(chromosome)	Saci_1882
AT1925	SulfolobusacidocaldariusDSM639(chromosome)	Saci_1955
AT1926	SulfolobusacidocaldariusDSM639(chromosome)	Saci_1977
AT1927	SulfolobusacidocaldariusDSM639(chromosome)	Saci_1980
AT1928	SulfolobusacidocaldariusDSM639(chromosome)	Saci_1984
AT1929	SulfolobusacidocaldariusDSM639(chromosome)	Saci_2003
AT1930	SulfolobusacidocaldariusDSM639(chromosome)	Saci_2079
AT1931	SulfolobusacidocaldariusDSM639(chromosome)	Saci_2193
AT1932	Psychrobacterarcticus273-4(chromosome)	Psyc_0985
AT1933	Psychrobacterarcticus273-4(chromosome)	Psyc_1114
AT1934	Psychrobacterarcticus273-4(chromosome)	Psyc_1136
AT6174	Psychrobacterarcticus273-4(chromosome)	Psyc_1265
AT1935	Pseudomonassyringaepv.phaseolicola1448A(plasmidlargeplasmid)	PSPPH_A0004
AT1936	Pseudomonassyringaepv.phaseolicola1448A(plasmidlargeplasmid)	PSPPH_A0035
AT1937	Pseudomonassyringaepv.phaseolicola1448A(plasmidlargeplasmid)	PSPPH_A0070
AT1938	Pseudomonassyringaepv.phaseolicola1448A(plasmidlargeplasmid)	PSPPH_A0094
AT1939	Pseudomonassyringaepv.phaseolicola1448A(plasmidlargeplasmid)	PSPPH_A0102
AT1940	Pseudomonassyringaepv.phaseolicola1448A(plasmidlargeplasmid)	PSPPH_A0137
AT1941	Pseudomonassyringaepv.phaseolicola1448A(plasmidsmallplasmid)	PSPPH_B0005
AT1942	Pseudomonassyringaepv.phaseolicola1448A(plasmidsmallplasmid)	PSPPH_B0015
AT1943	Pseudomonassyringaepv.phaseolicola1448A(plasmidsmallplasmid)	PSPPH_B0056
AT1944	StreptococcuspyogenesMGAS6180(chromosome)	M28_Spy0444
AT1945	StreptococcuspyogenesMGAS6180(chromosome)	M28_Spy1030
AT1946	StreptococcuspyogenesMGAS6180(chromosome)	M28_Spy1282
AT1947	StreptococcuspyogenesMGAS6180(chromosome)	M28_Spy1330
AT1948	StreptococcuspyogenesMGAS6180(chromosome)	M28_Spy1334
AT1949	StreptococcuspyogenesMGAS6180(chromosome)	M28_Spy1630
AT1950	StreptococcuspyogenesMGAS6180(chromosome)	M28_Spy1841
AT1951	StreptococcuspyogenesMGAS5005(chromosome)	M5005_Spy_0456
AT1952	StreptococcuspyogenesMGAS5005(chromosome)	M5005_Spy_1219
AT1953	StreptococcuspyogenesMGAS5005(chromosome)	M5005_Spy_1464
AT1954	StreptococcuspyogenesMGAS5005(chromosome)	M5005_Spy_1640
AT1955	DechloromonasaromaticaRCB(chromosome)	Daro_0824
AT1956	DechloromonasaromaticaRCB(chromosome)	Daro_2535
AT1957	DechloromonasaromaticaRCB(chromosome)	Daro_2804
AT1958	ThermobifidafuscaYX(chromosome)	Tfu_0090
[truncated: 4,257 more rows]
